# Supplementary material
Source: PubMed Central journal article supplement (PMC3664191)

# Small-molecule pyrimidine inhibitors of the cdc2-like (Clk) and dual specificity tyrosine phosphorylation-regulated (Dyrk) kinases: Development of chemical probe ML315

## Supporting Information

Thomas C. Coombs,<sup>a</sup> Cordelle Tanega,<sup>b</sup> Min Shen,<sup>b</sup> Jenna L. Wang,<sup>a</sup> Douglas S. Auld,<sup>b</sup> Samuel W. Gerritz,<sup>c</sup> Frank J. Schoenen,<sup>a</sup> Craig J. Thomas,<sup>b</sup> and Jeffrey Aubé<sup>a,d\*</sup>

<sup>a</sup>University of Kansas Specialized Chemistry Center, University of Kansas, Lawrence, KS 66047, USA

<sup>b</sup>NIH Chemical Genomics Center, National Human Genome Research Institute, NIH 9800 Medical Center Drive, MSC 3370 Bethesda, MD 20892-3370, USA

<sup>c</sup>Bristol-Myers Squibb Research, 5 Research Parkway, Wallingford, CT 06492, USA

<sup>d</sup>Department of Medicinal Chemistry, University of Kansas, Lawrence, KS 66047, USA

\*Corresponding author: Tel.: 785-864-4496; Fax: 785-864-5326

*Email address:* [jaube@ku.edu](mailto:jaube@ku.edu)

---

### Table of Contents

Copies of <sup>1</sup>H and <sup>13</sup>C NMR spectra for all synthesized compounds

SI-B -2

---

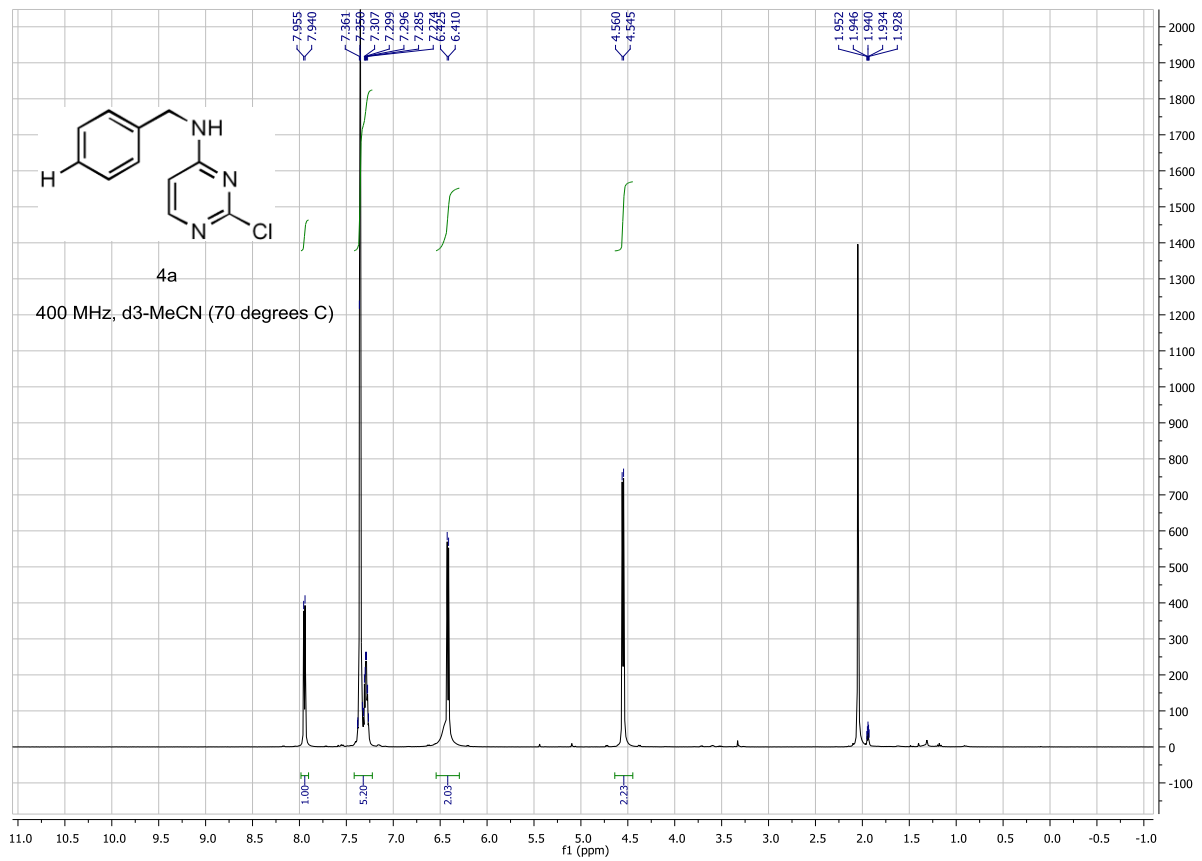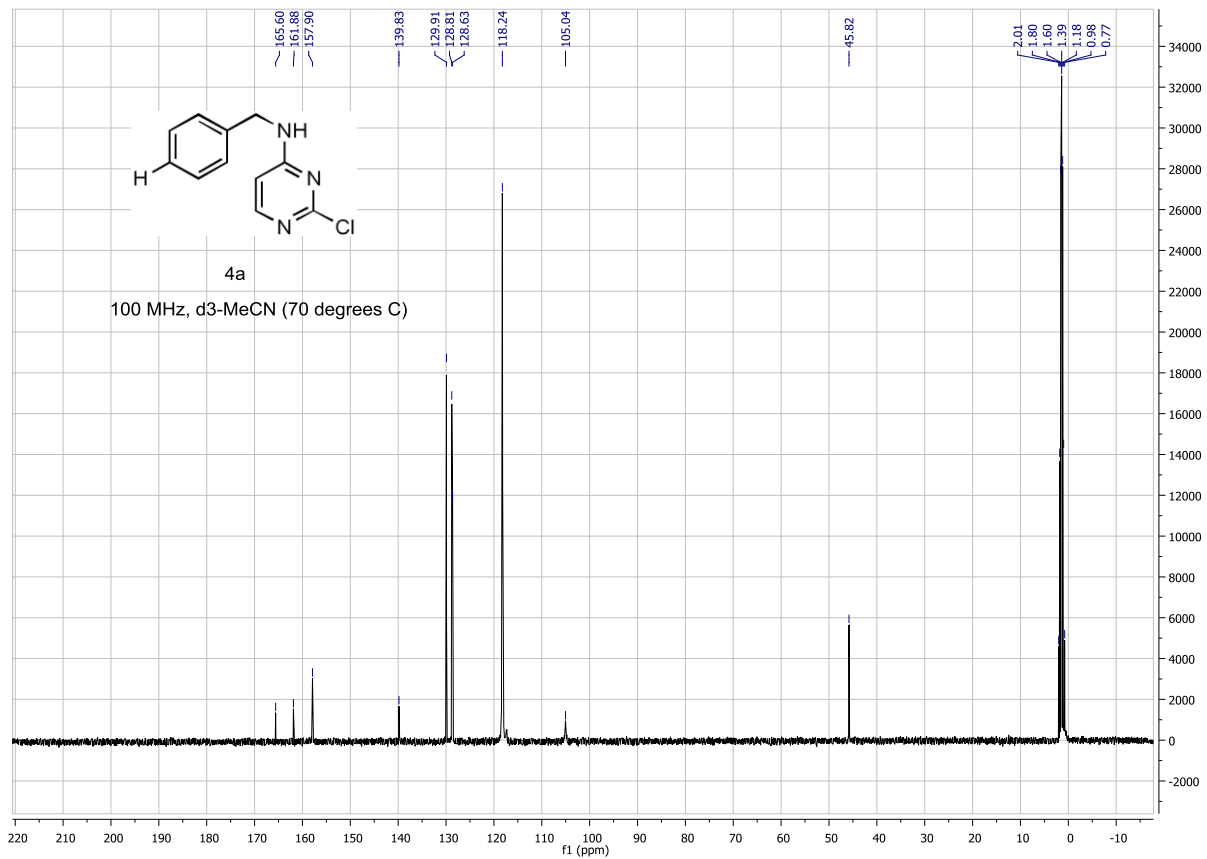

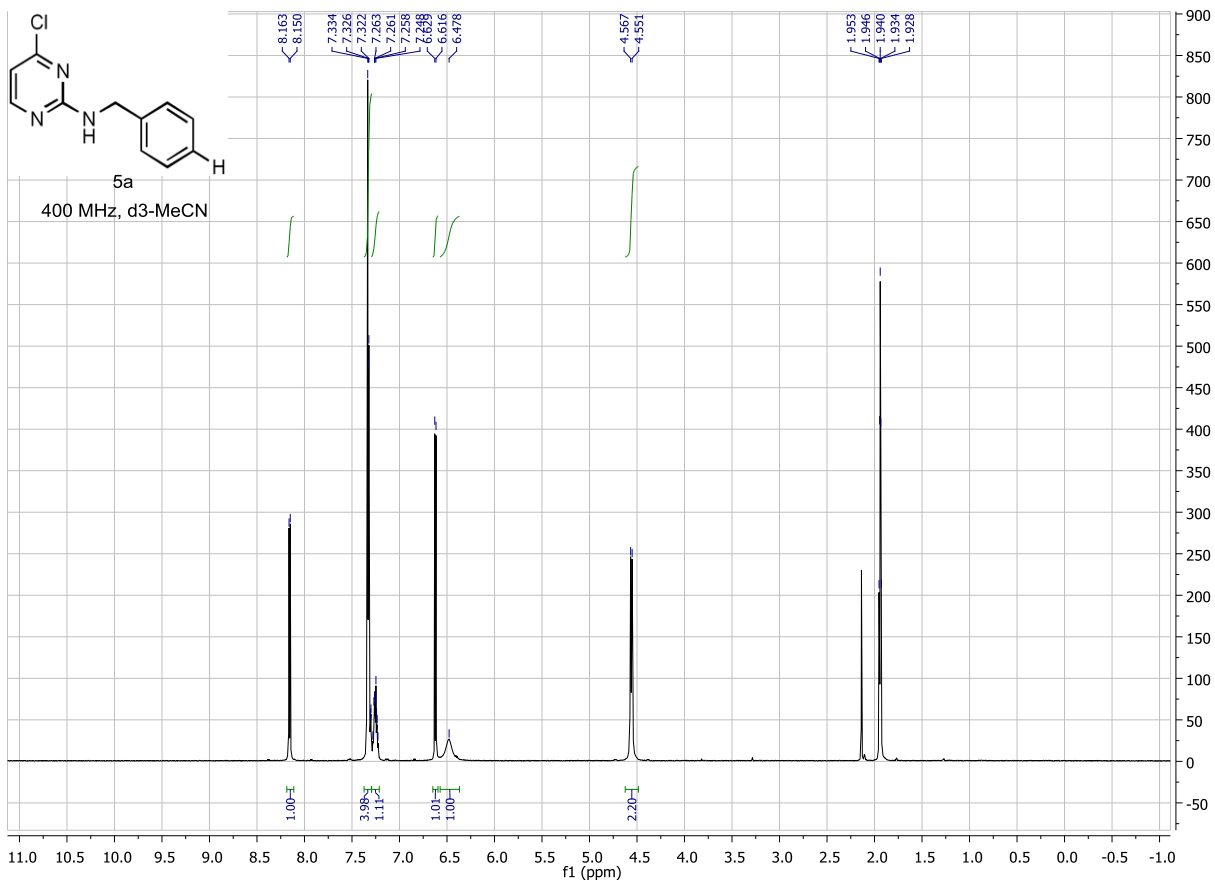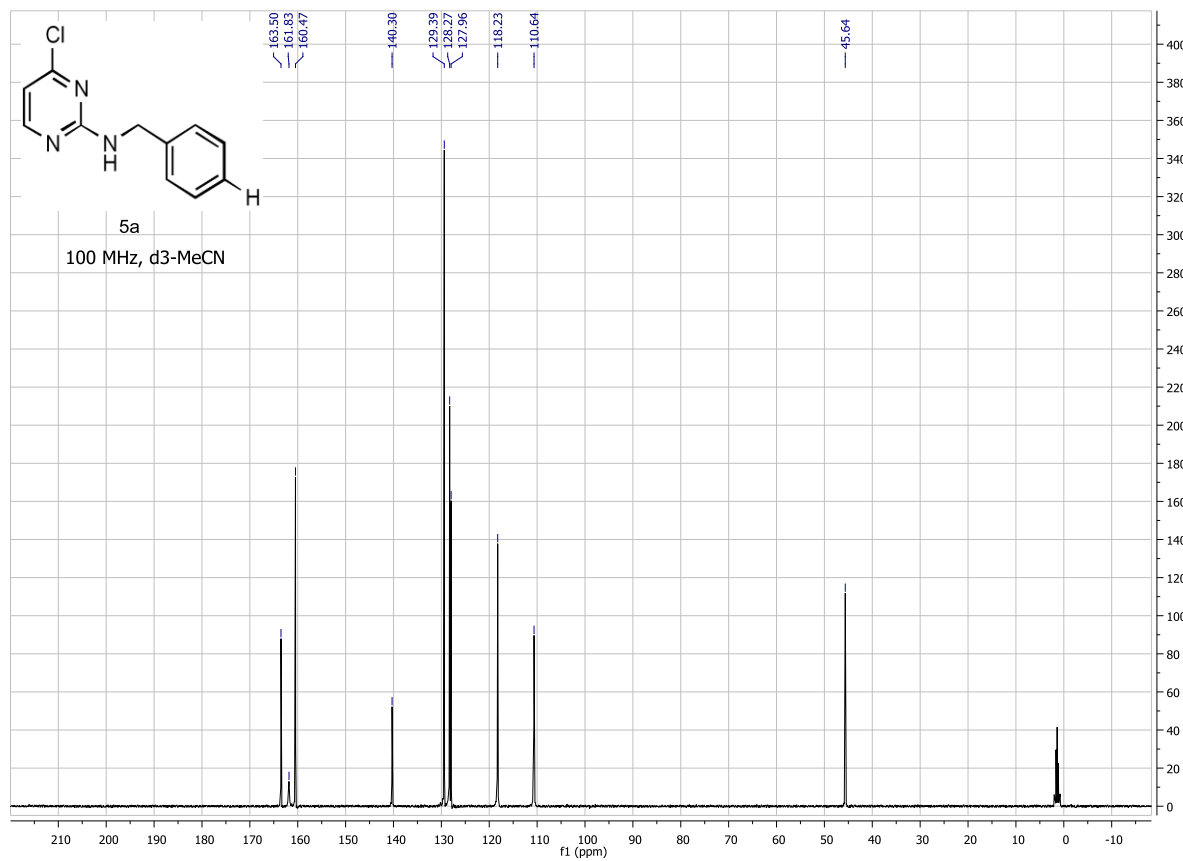

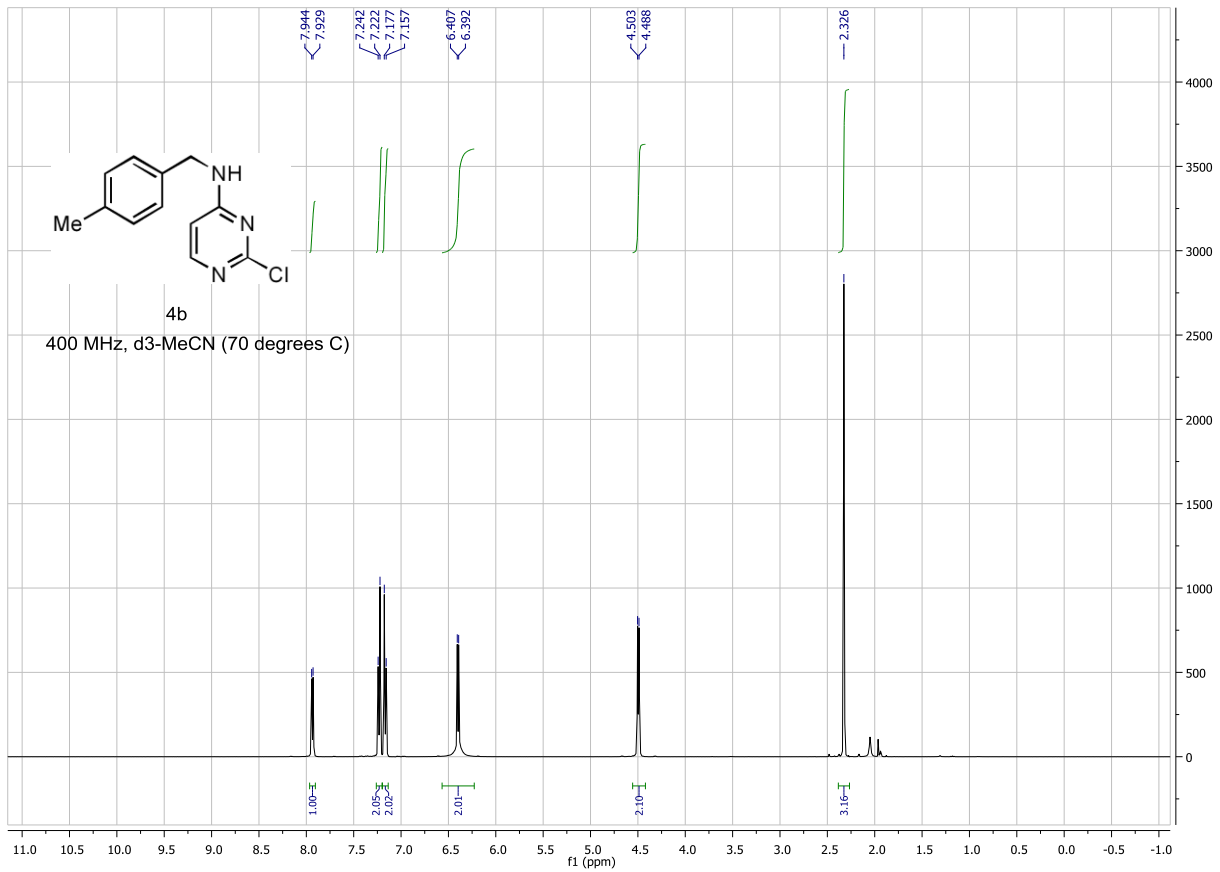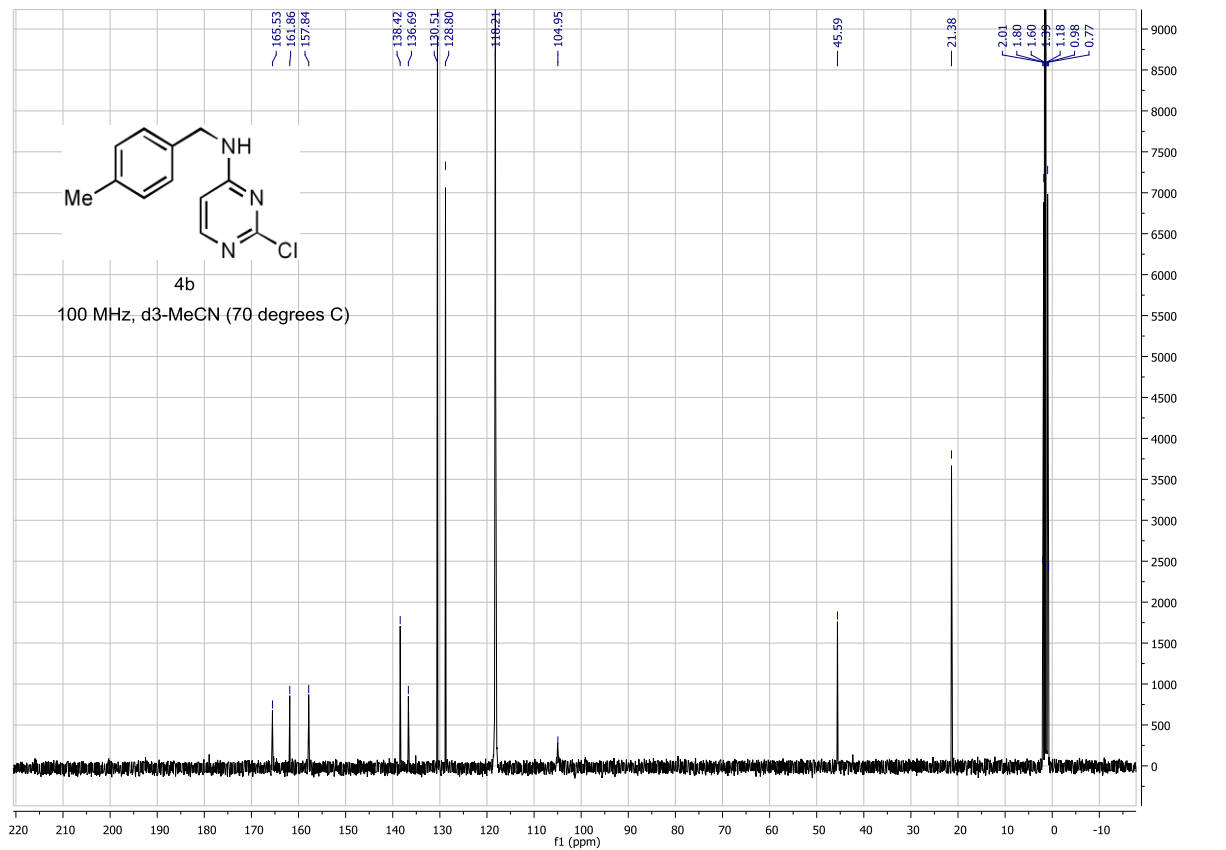

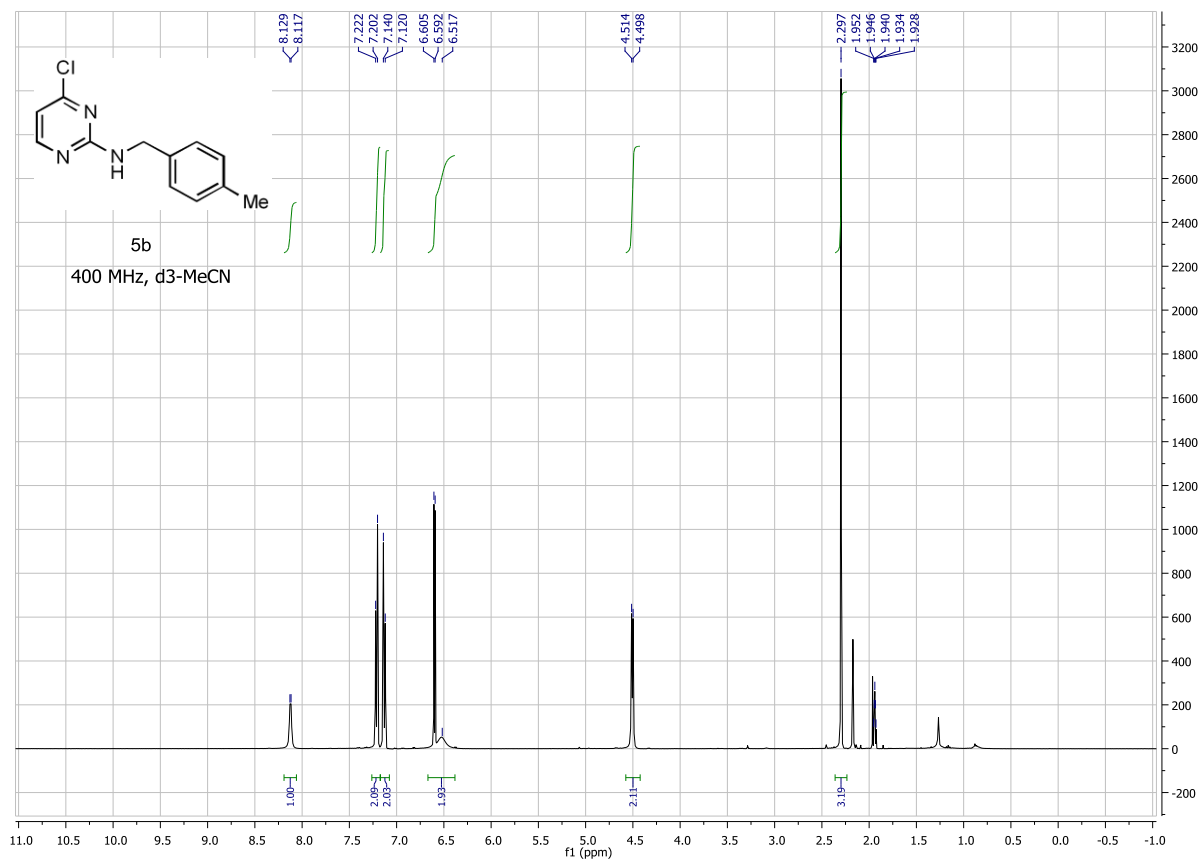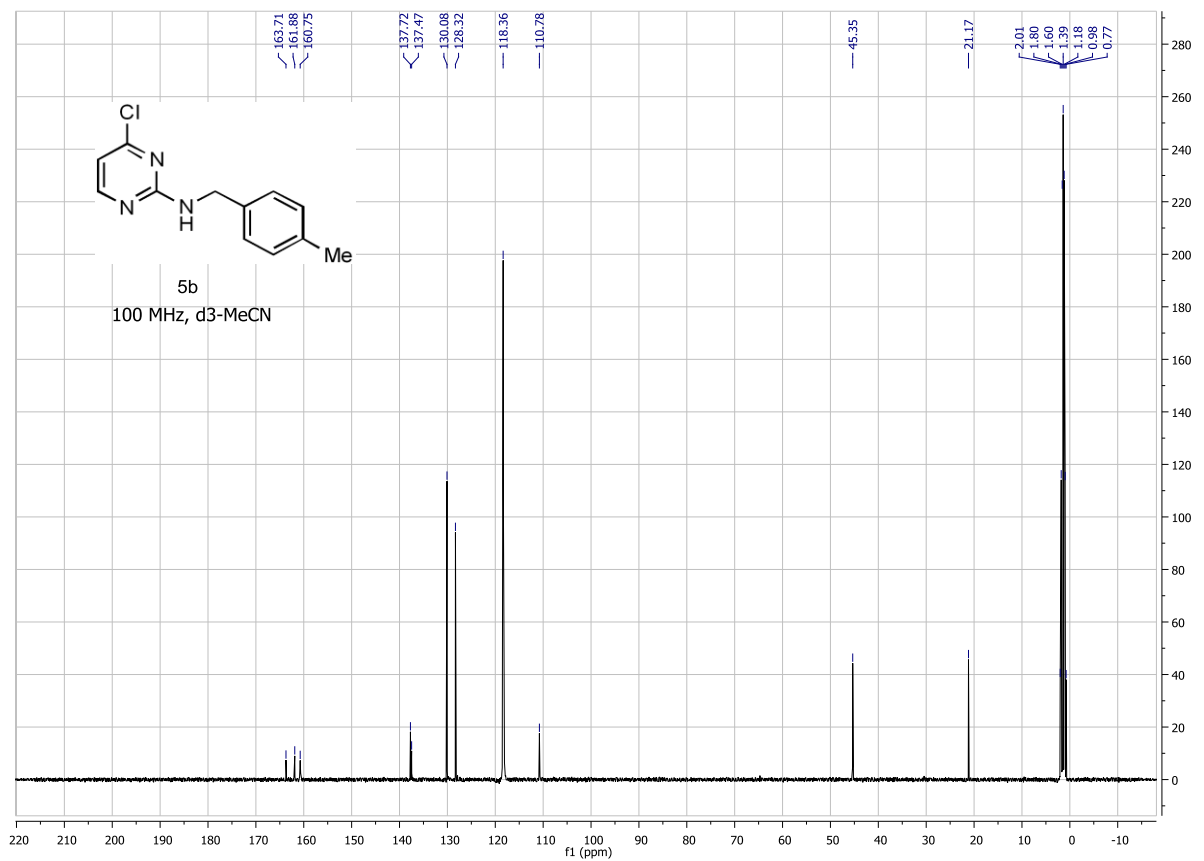

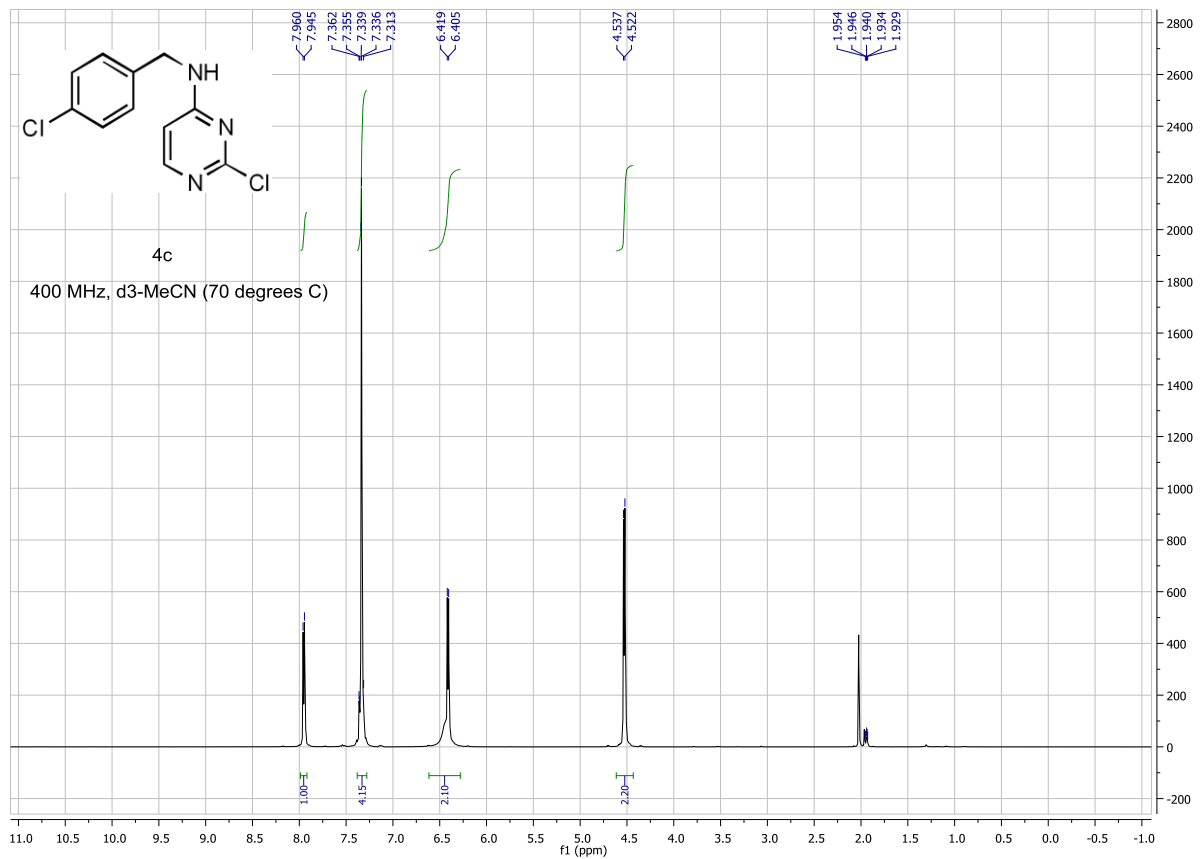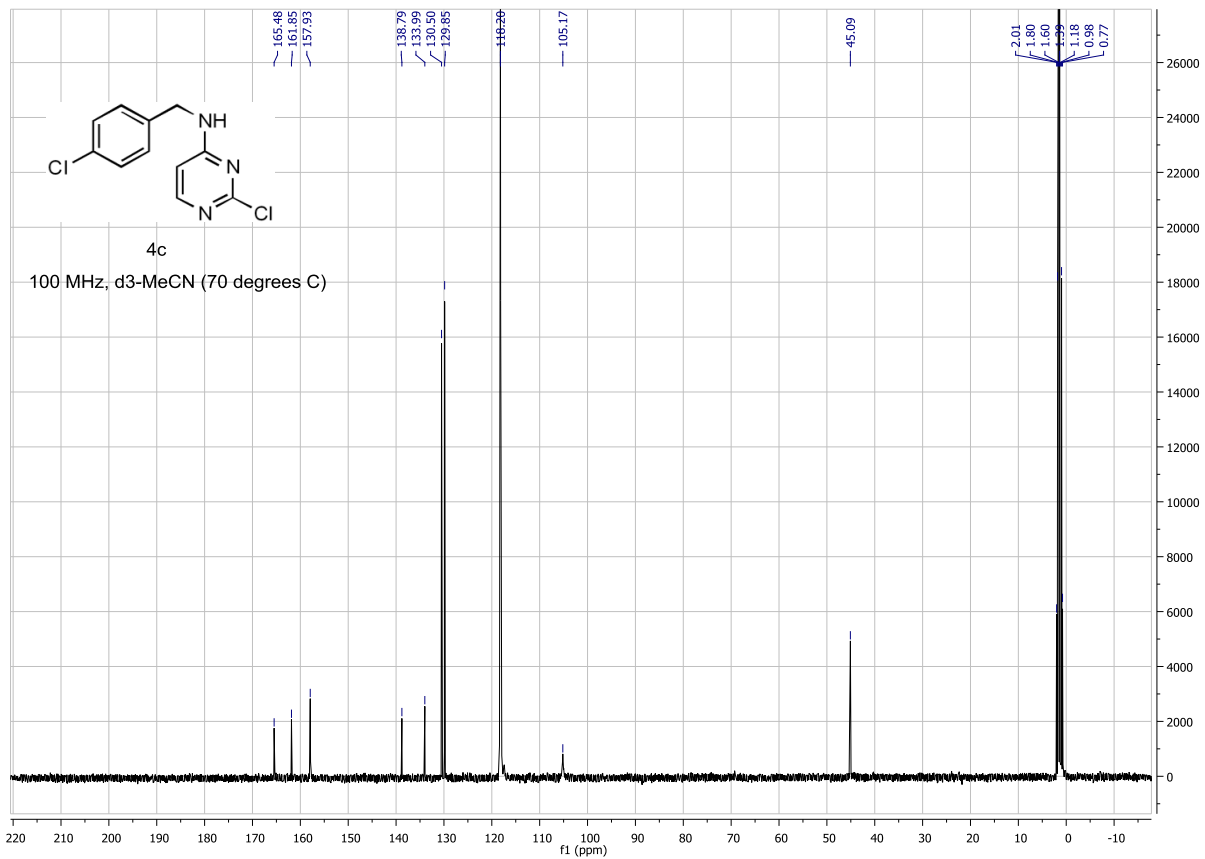

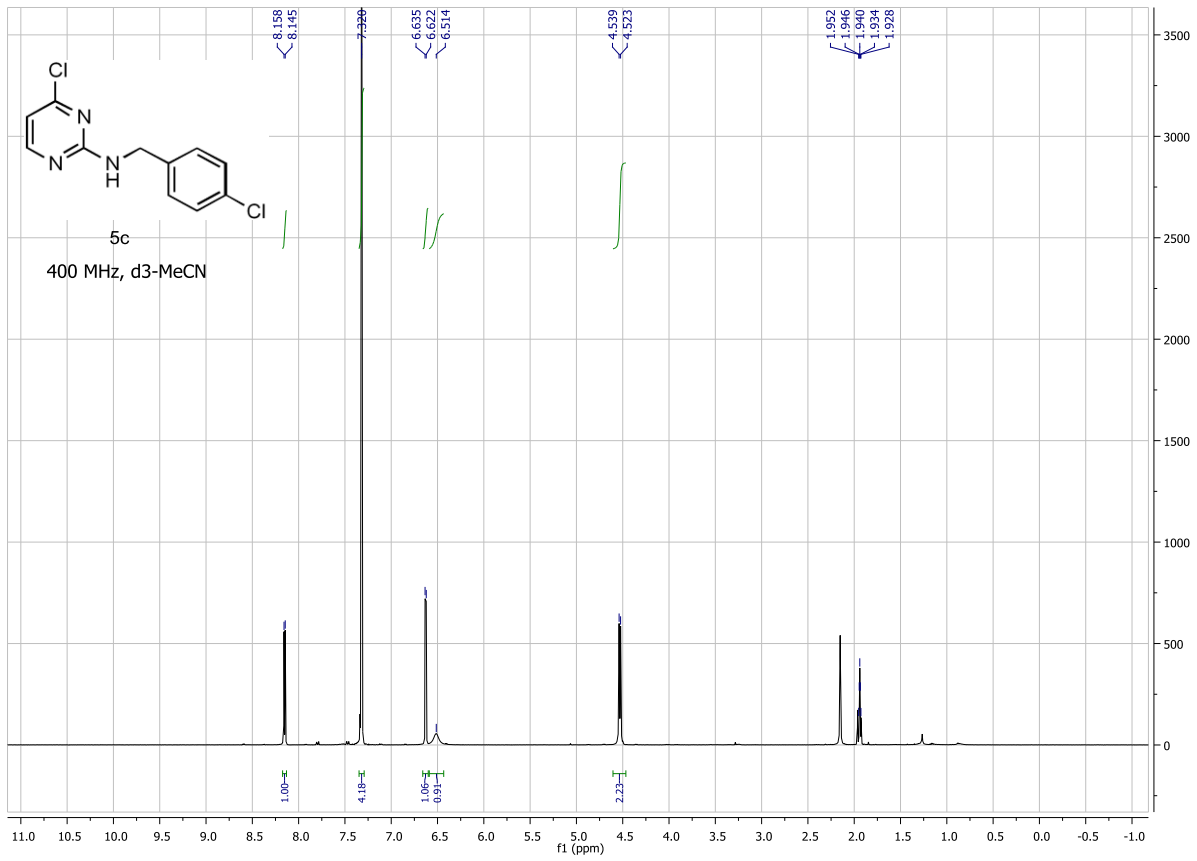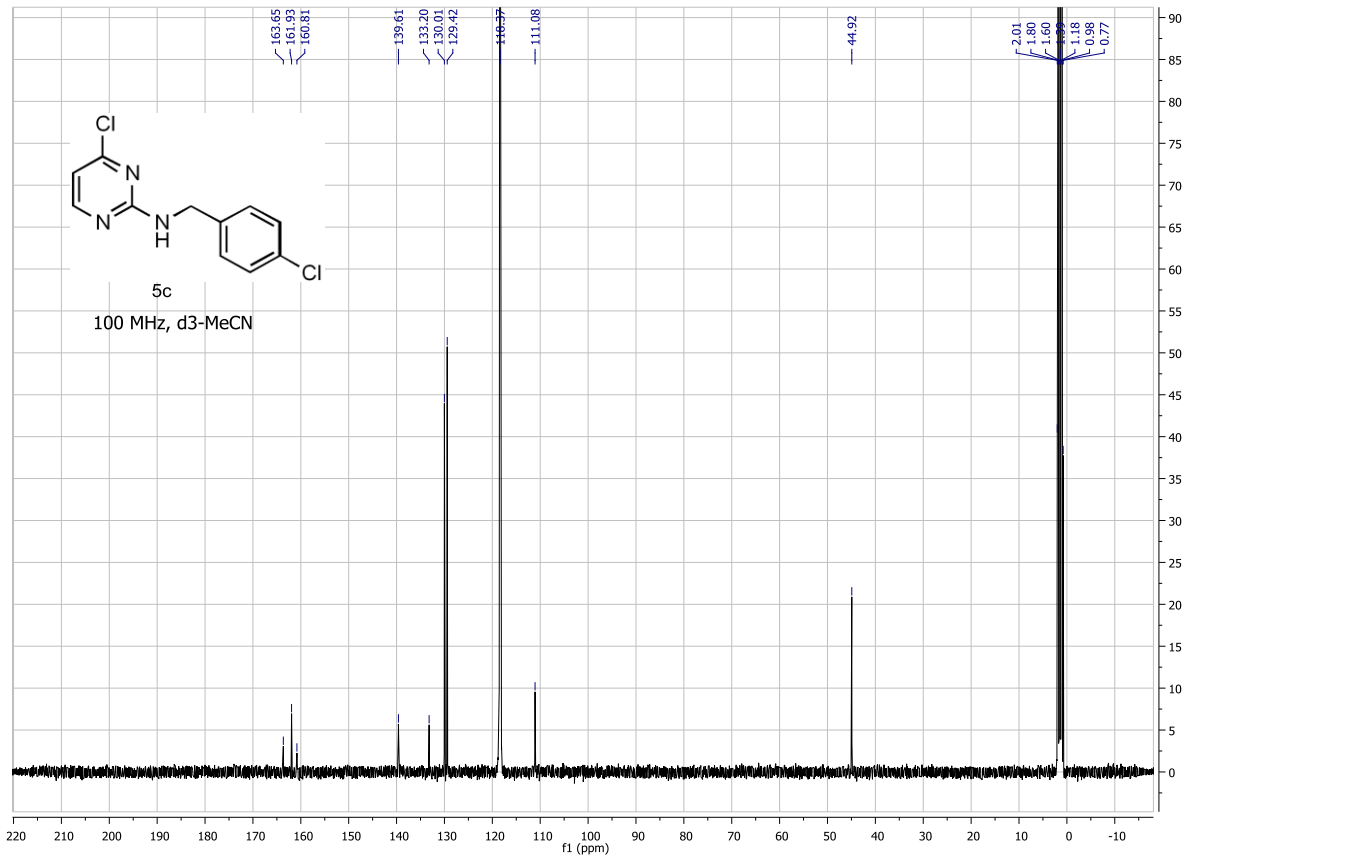

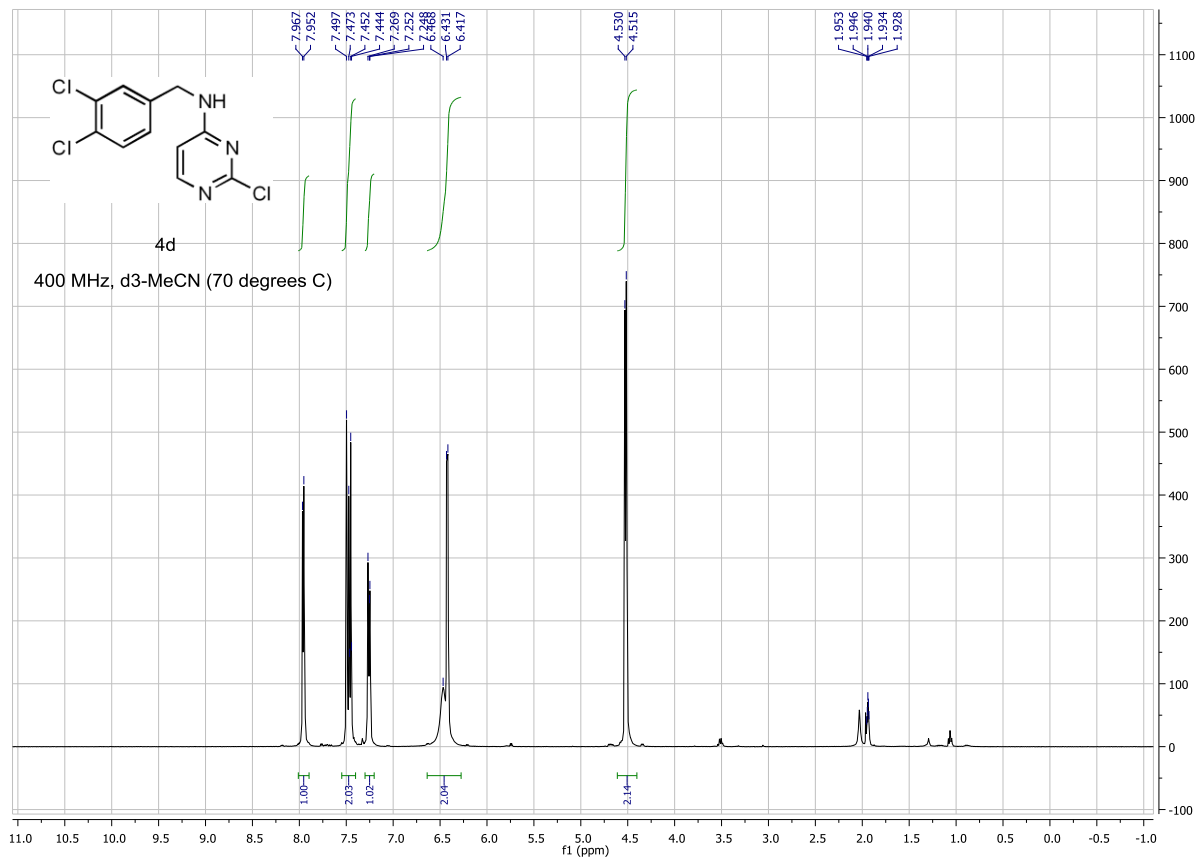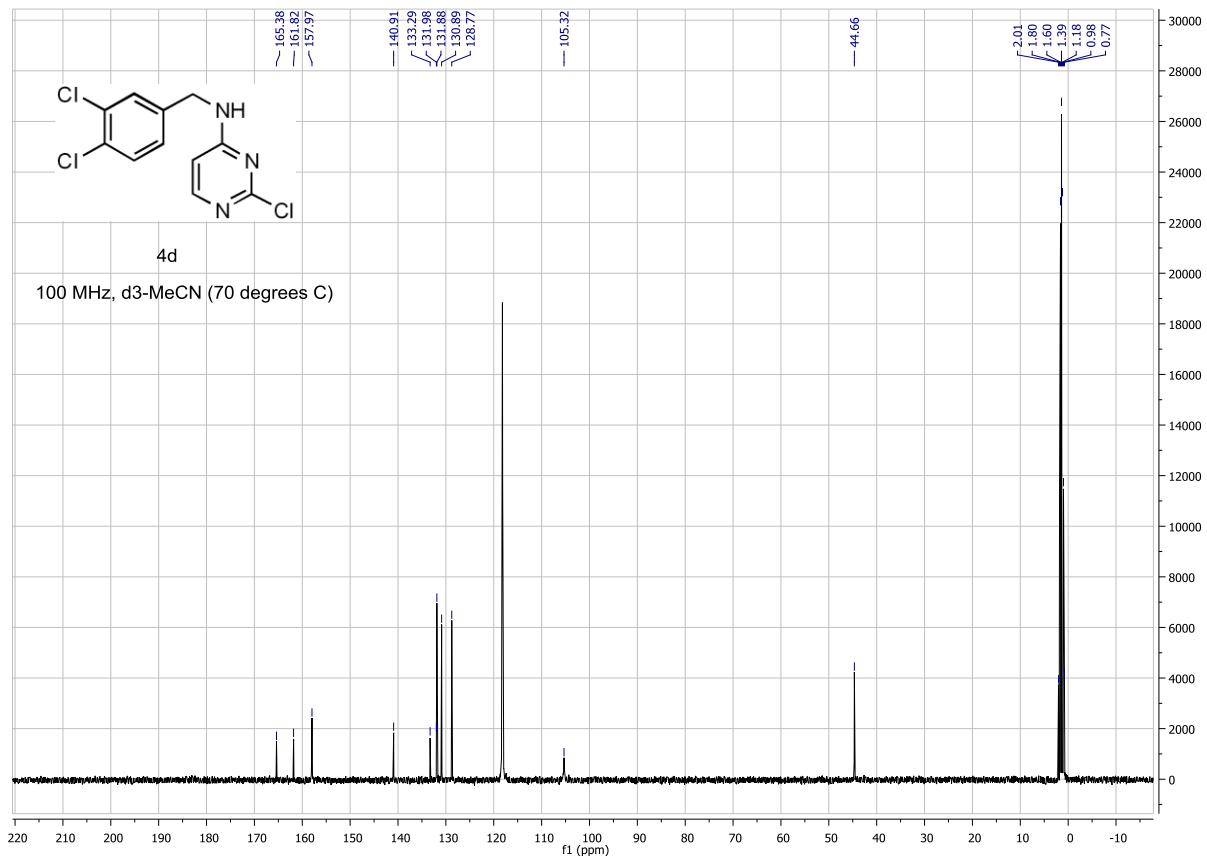



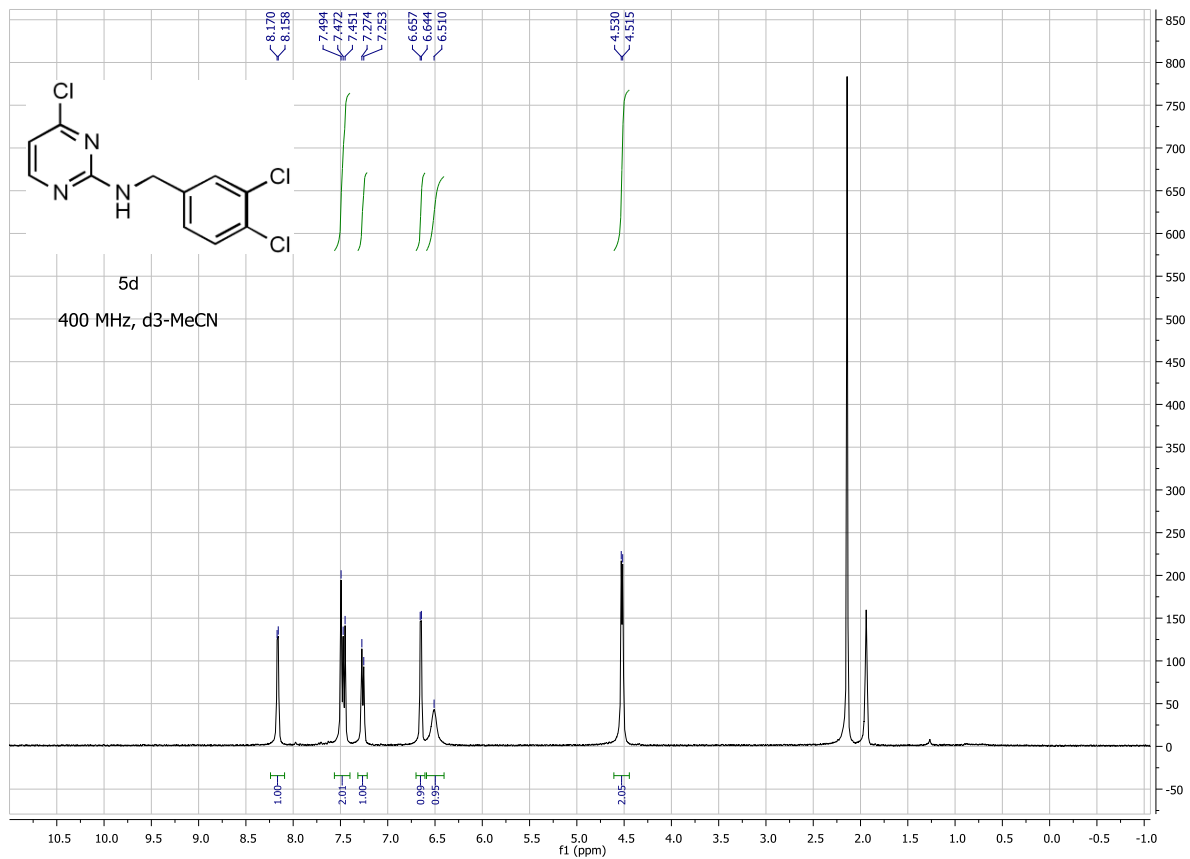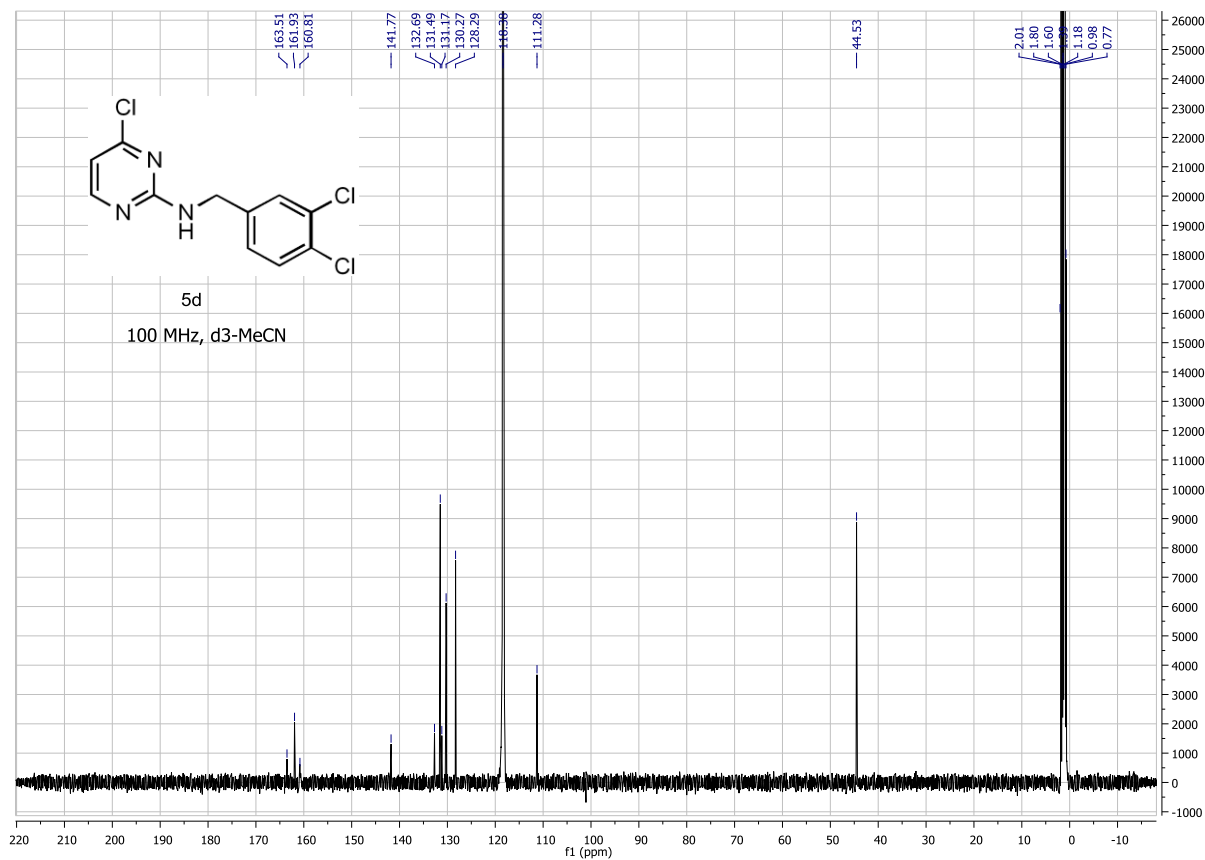

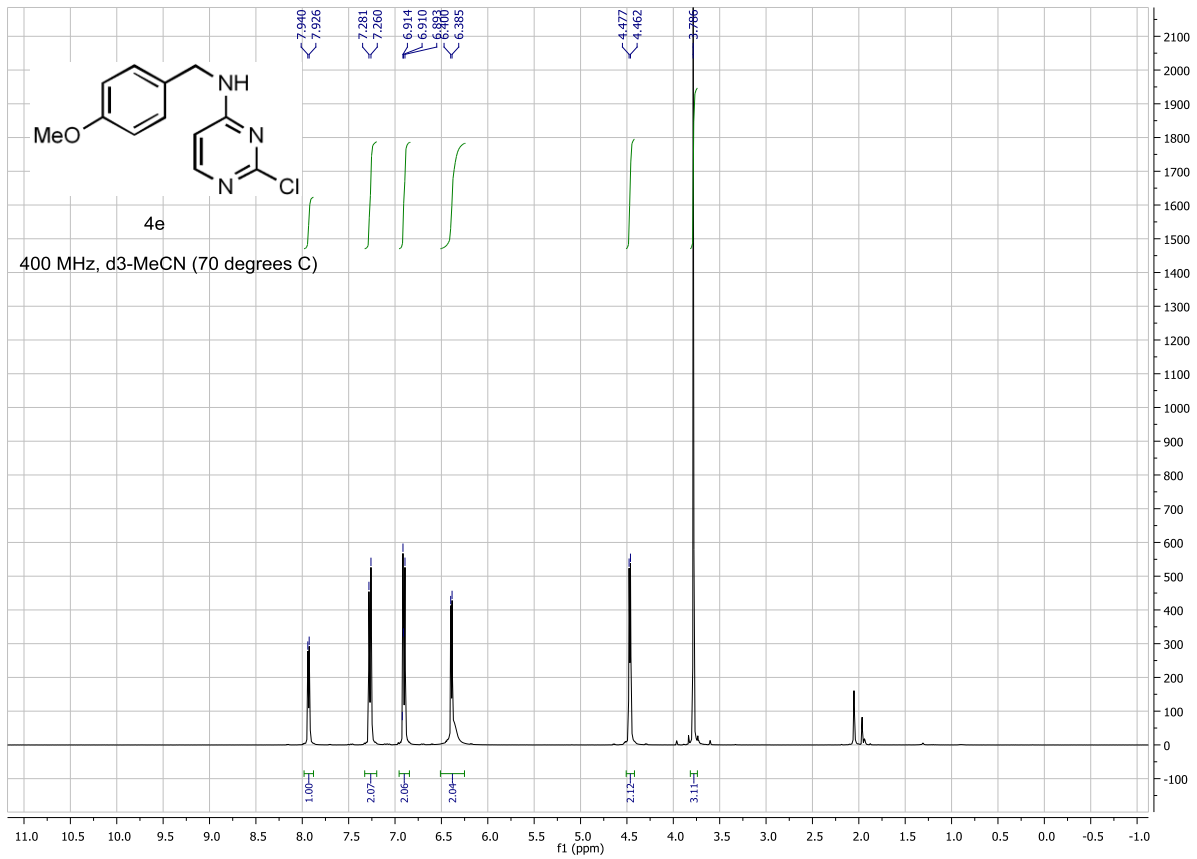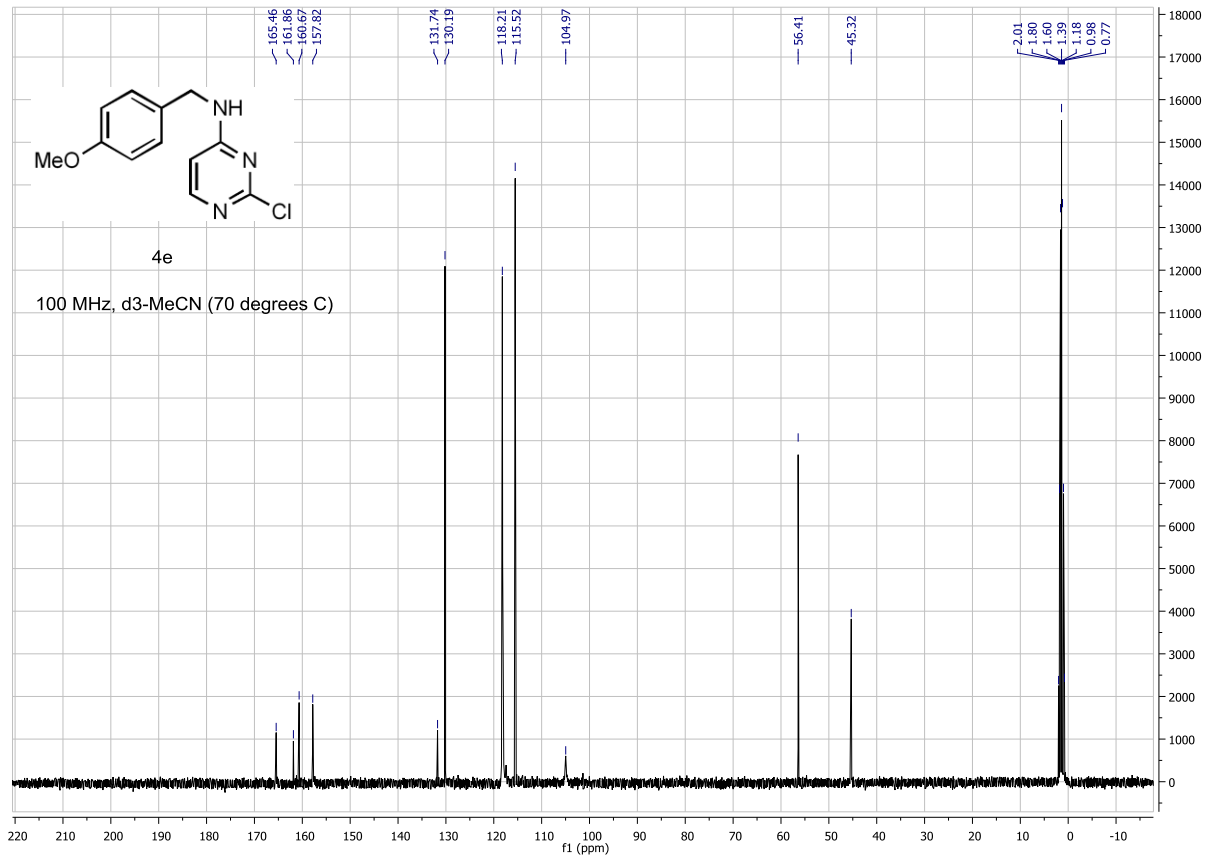

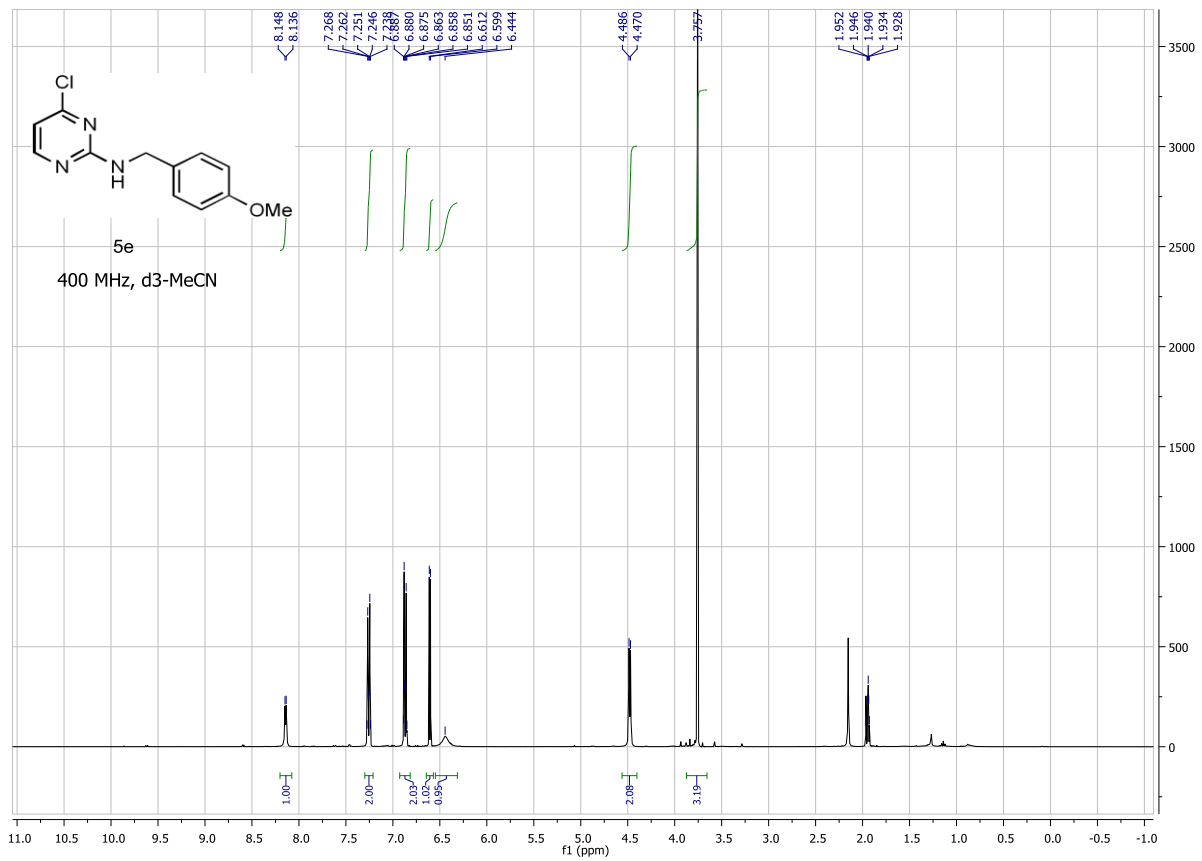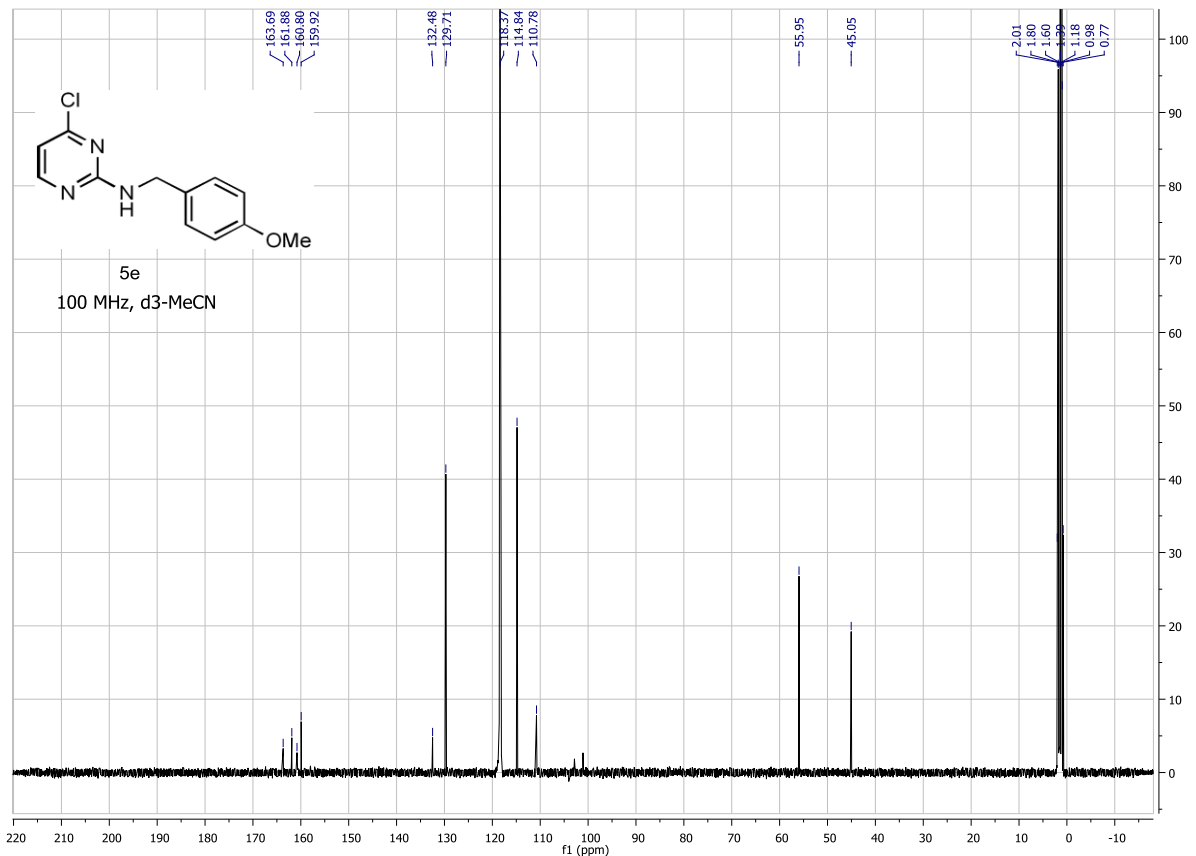

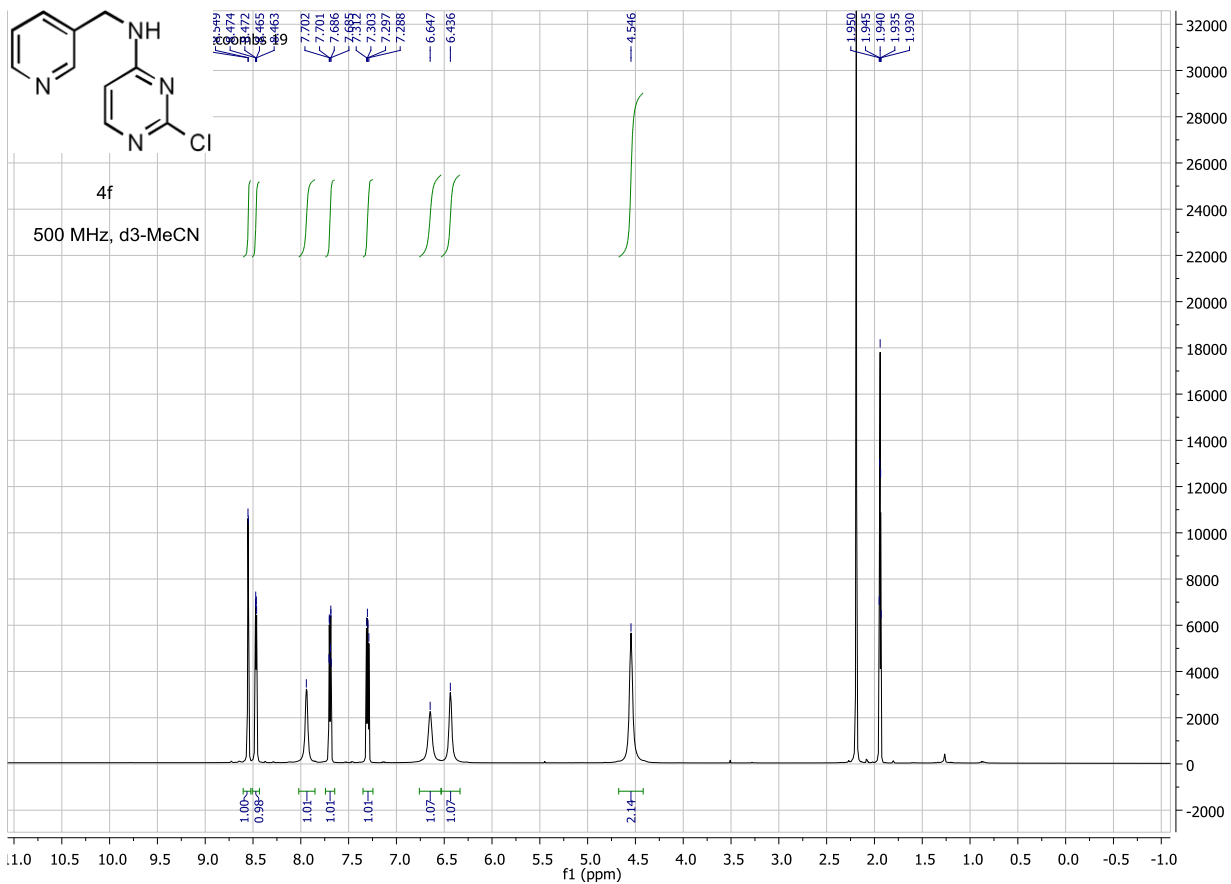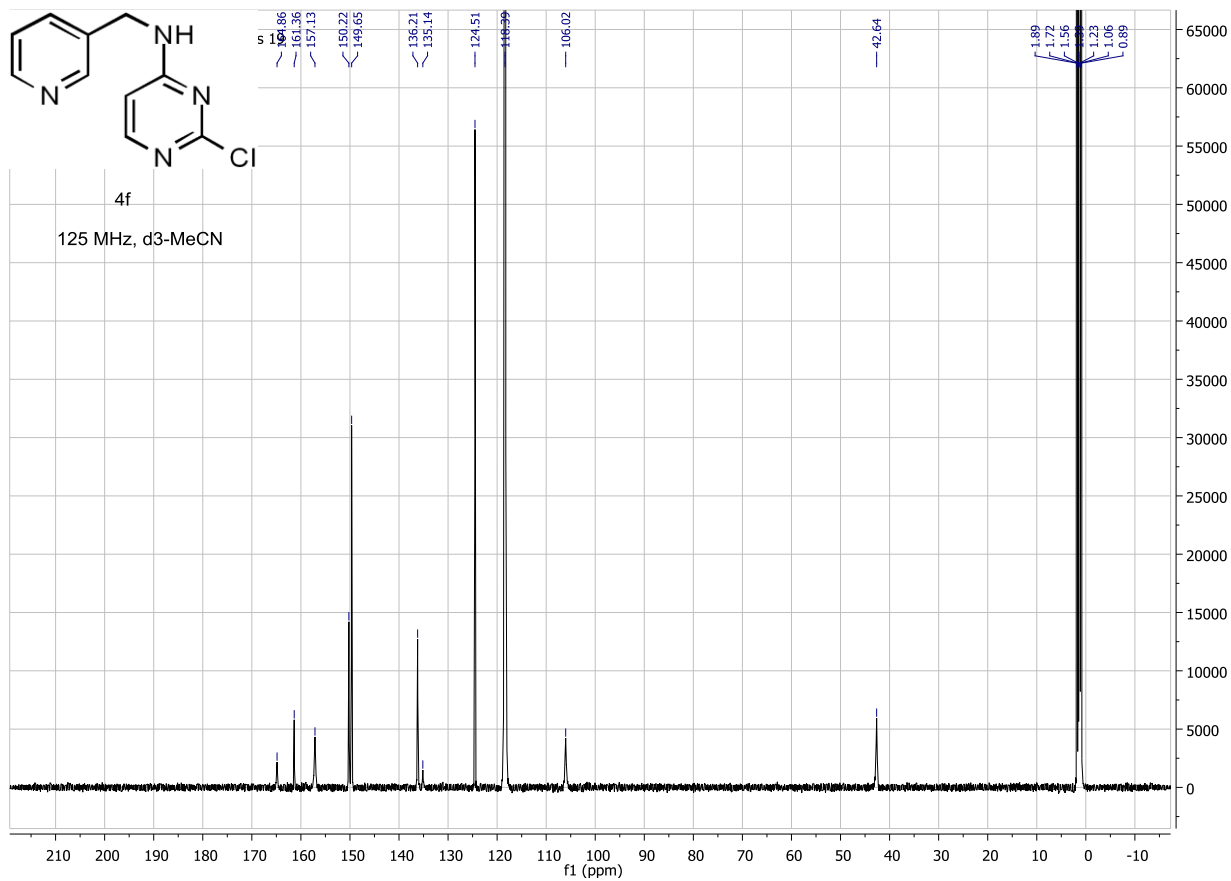

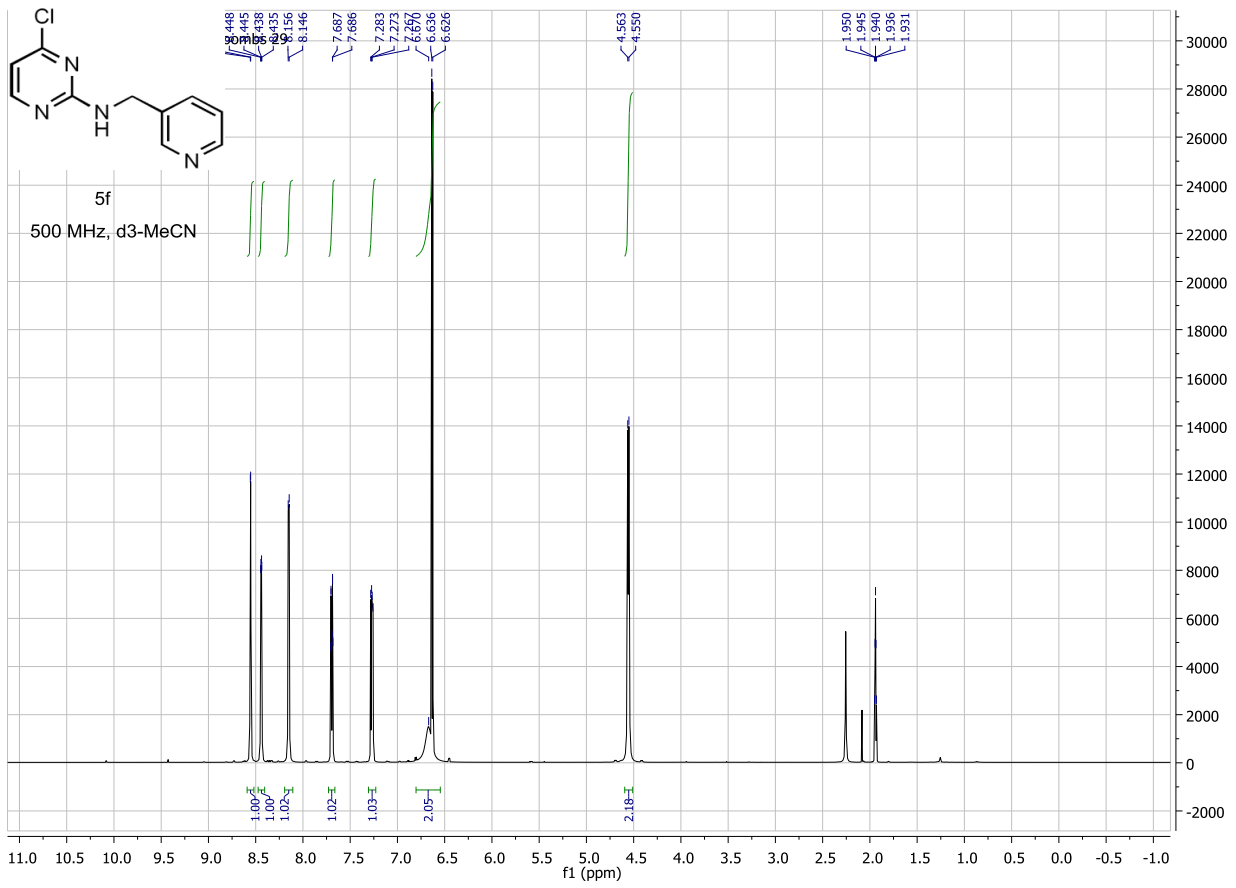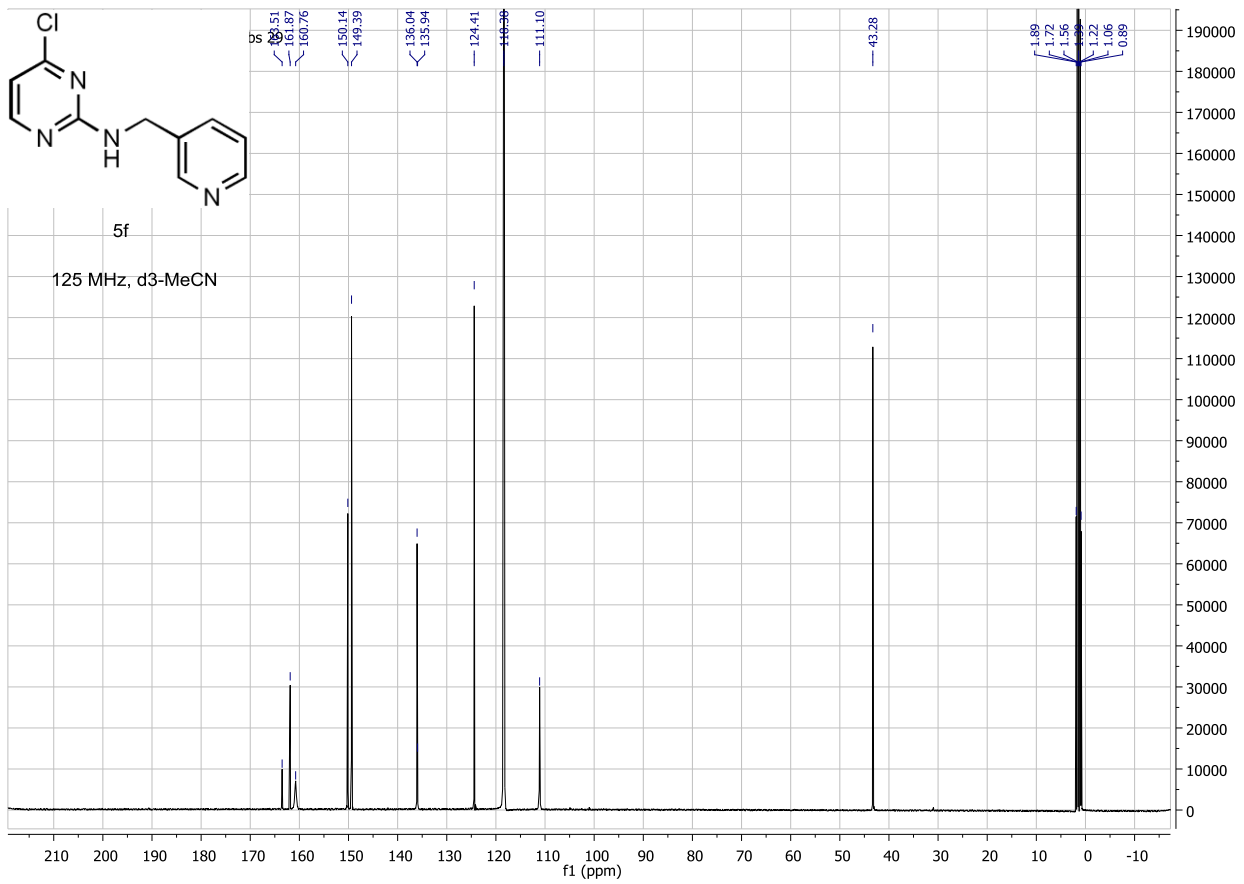

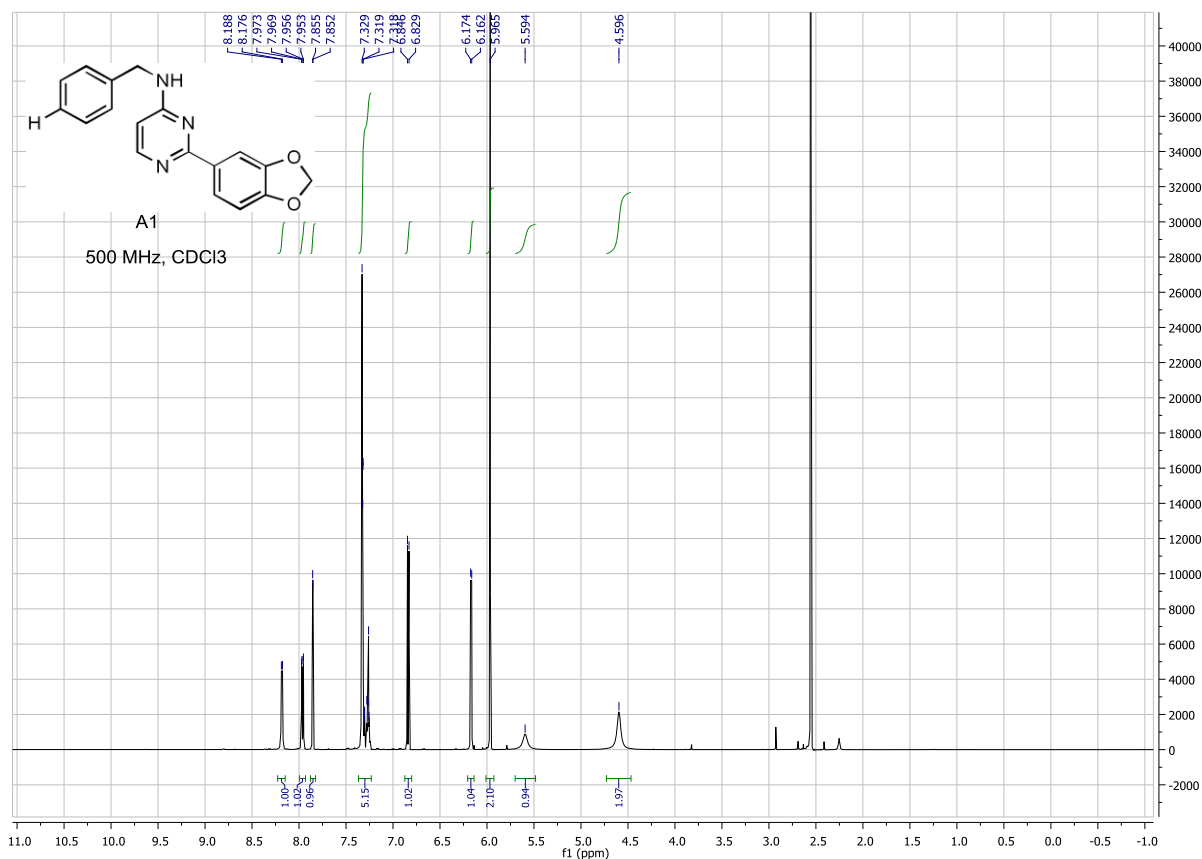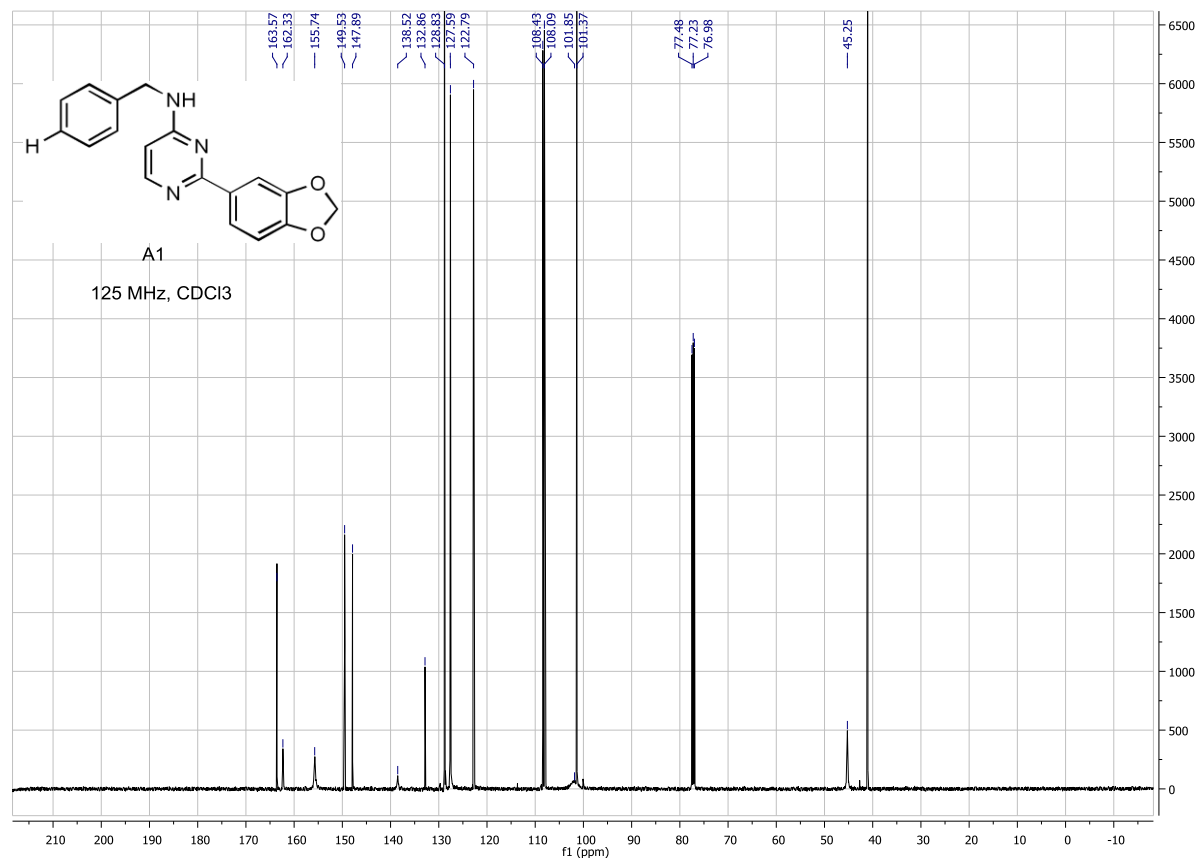

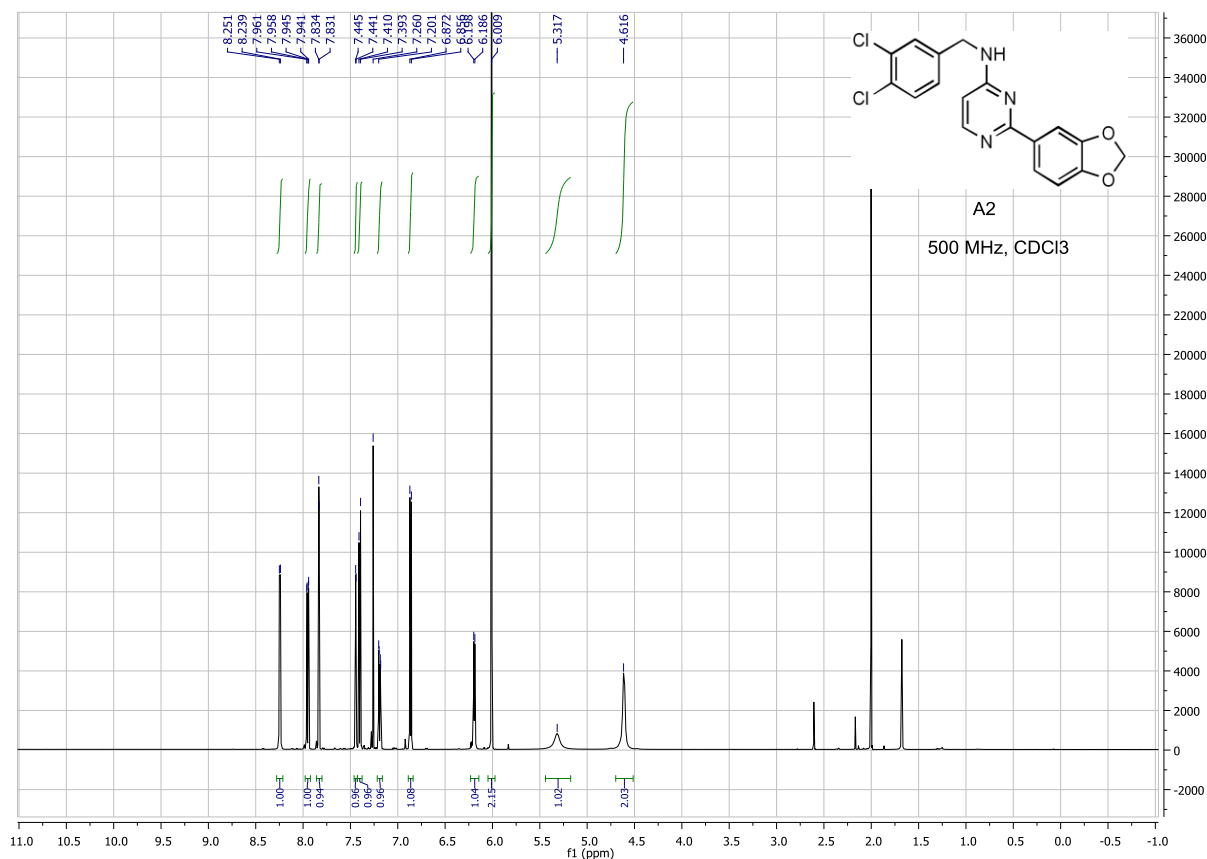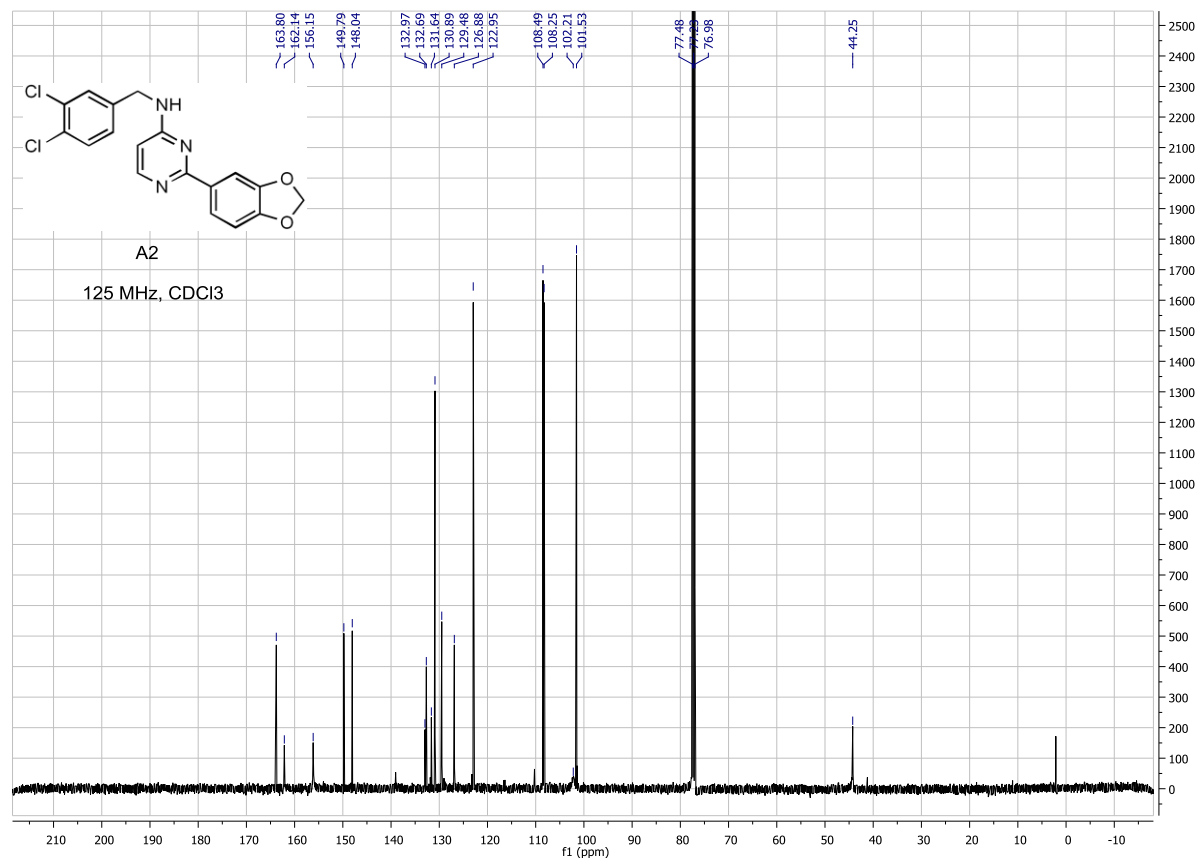





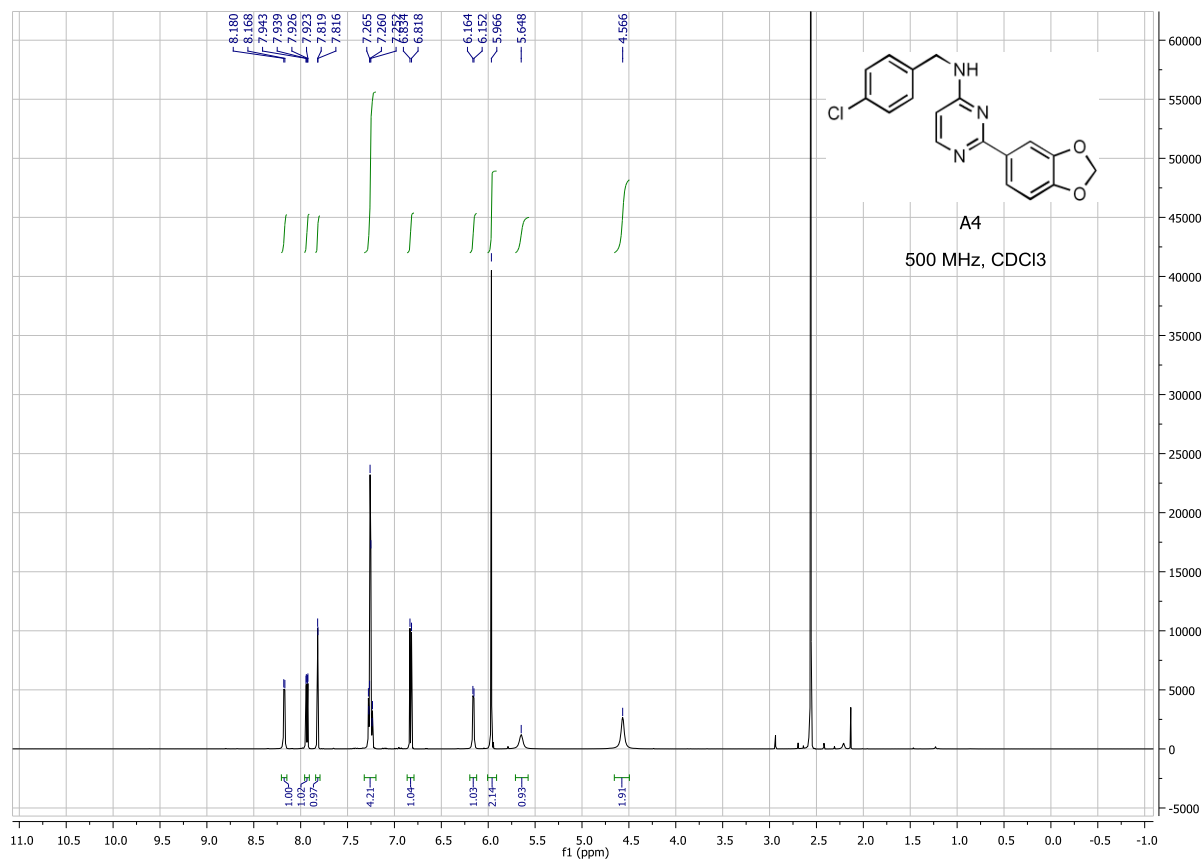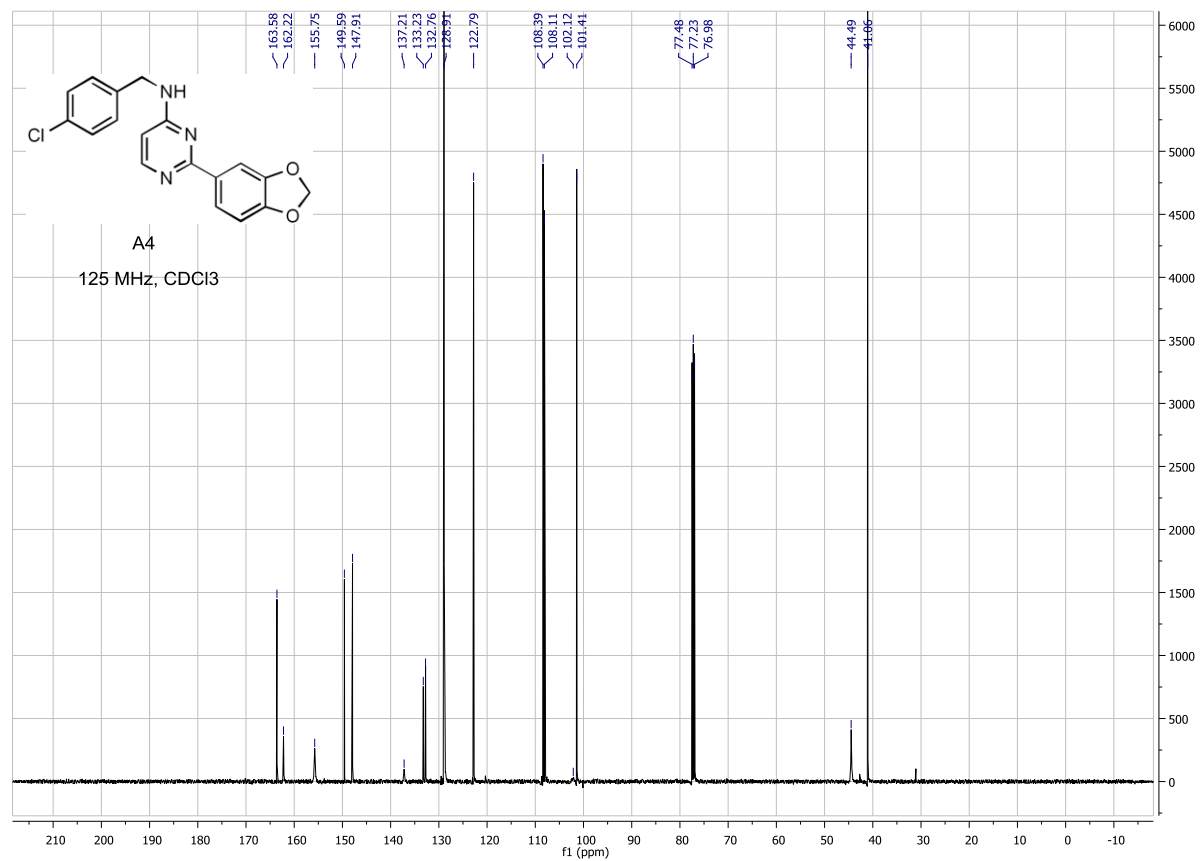

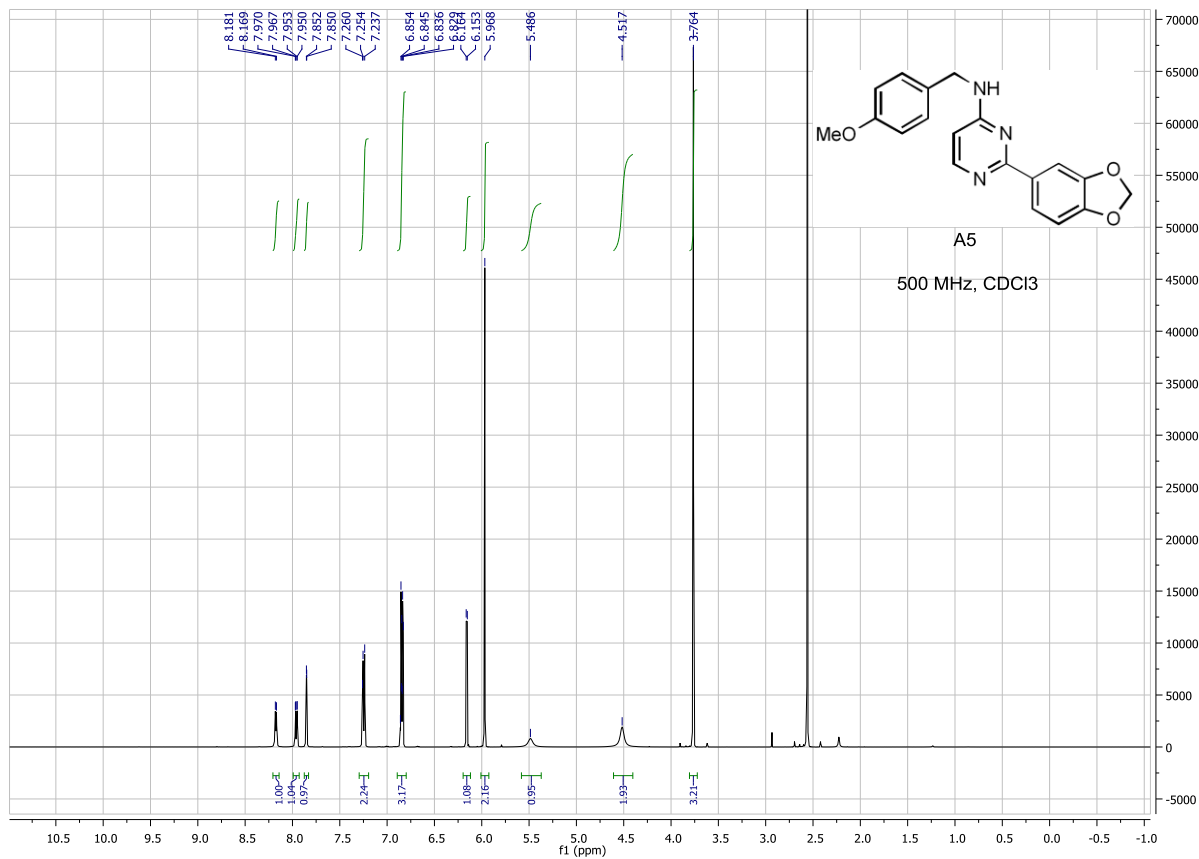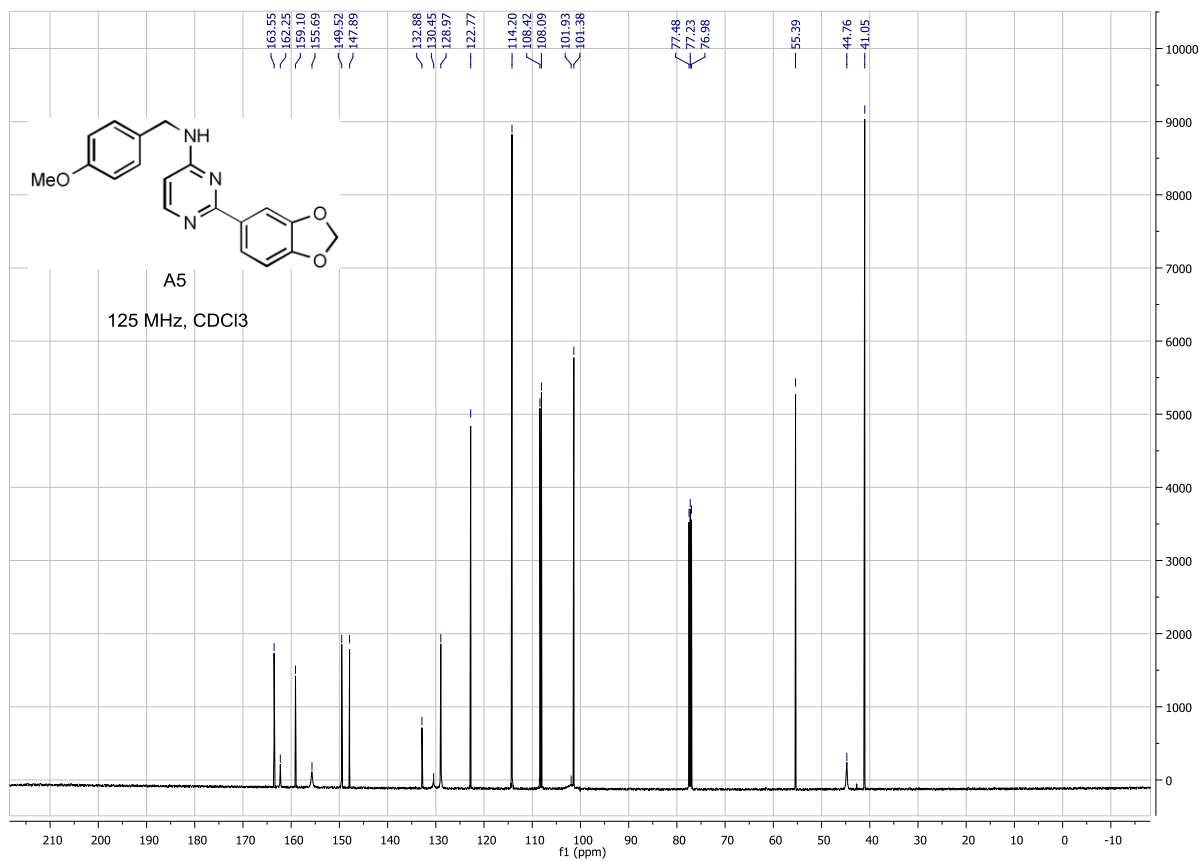

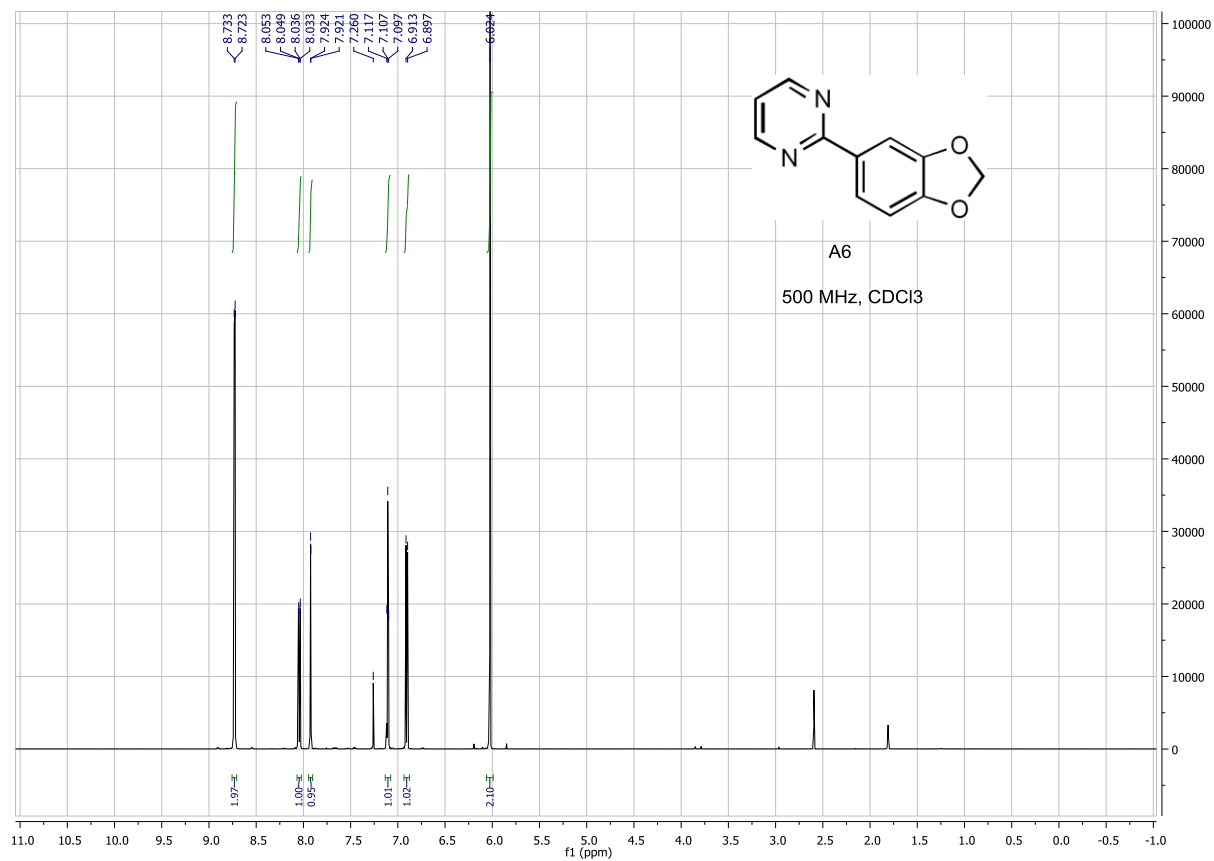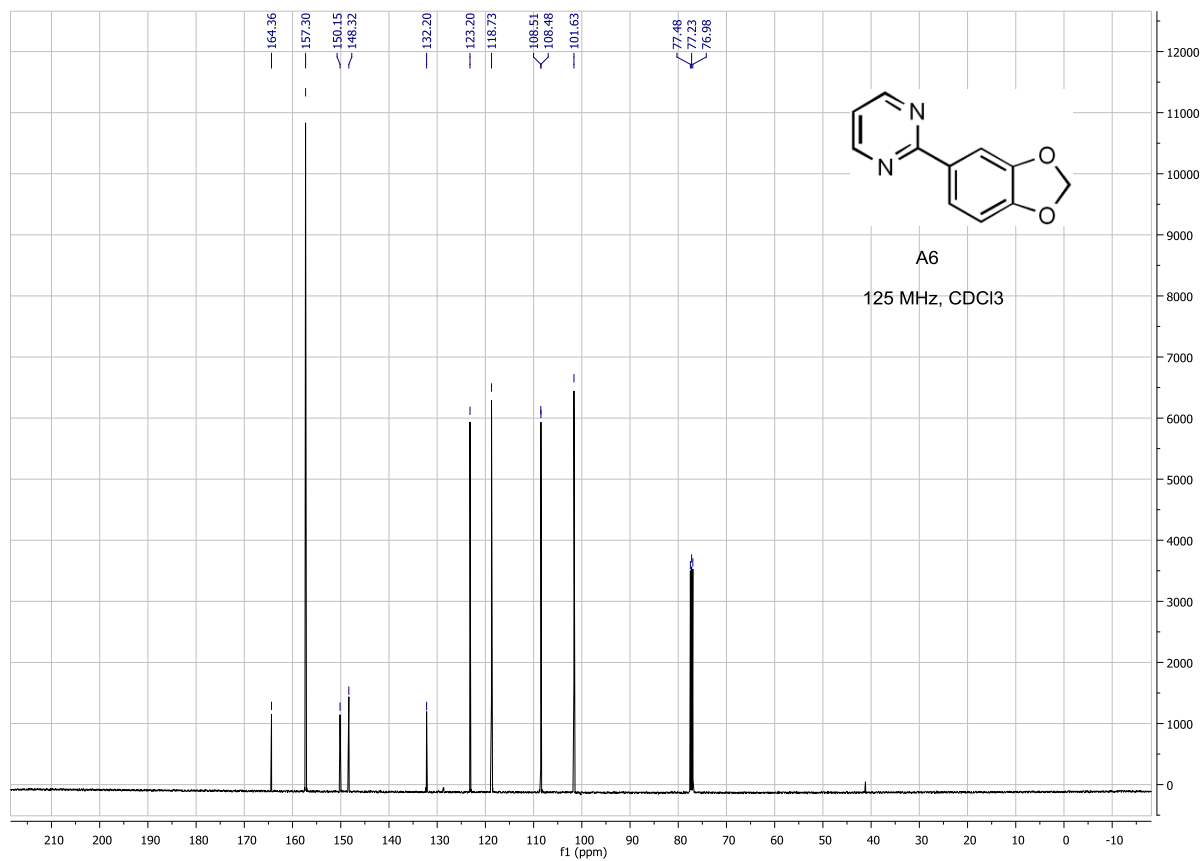

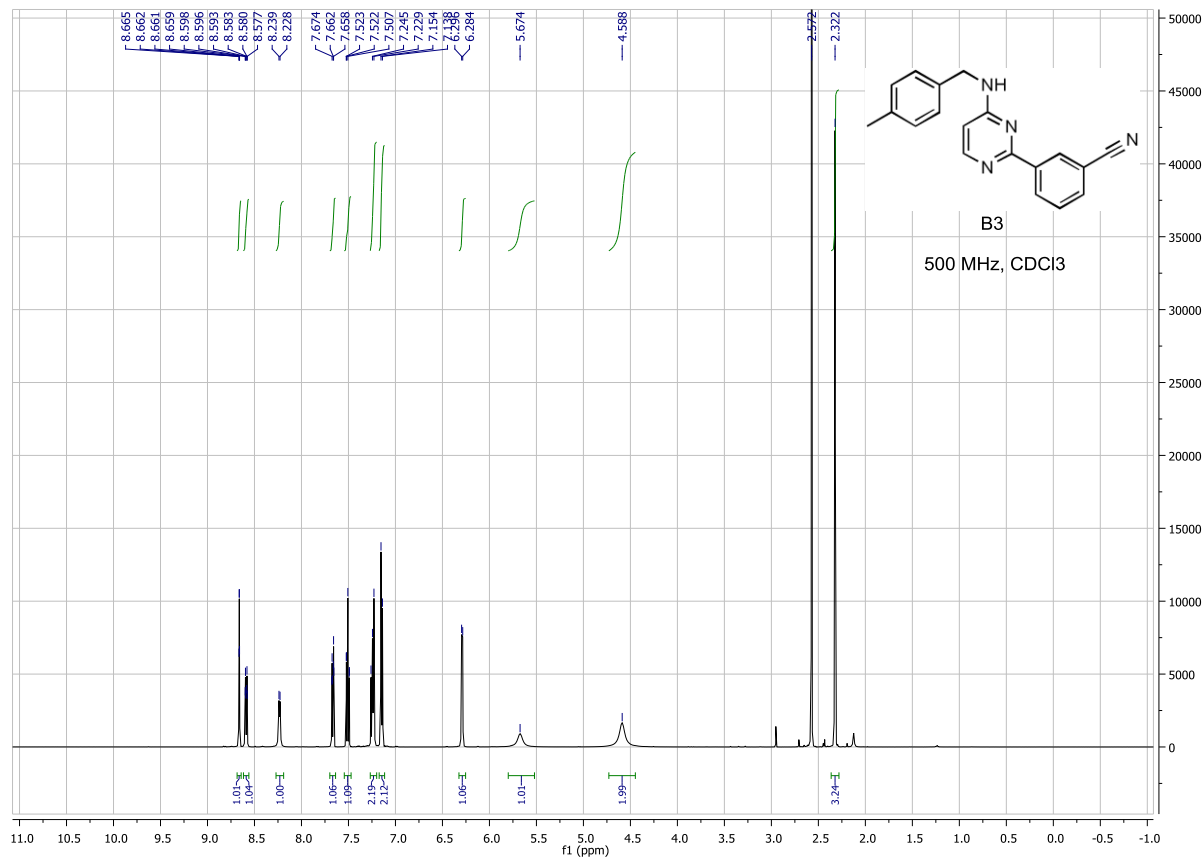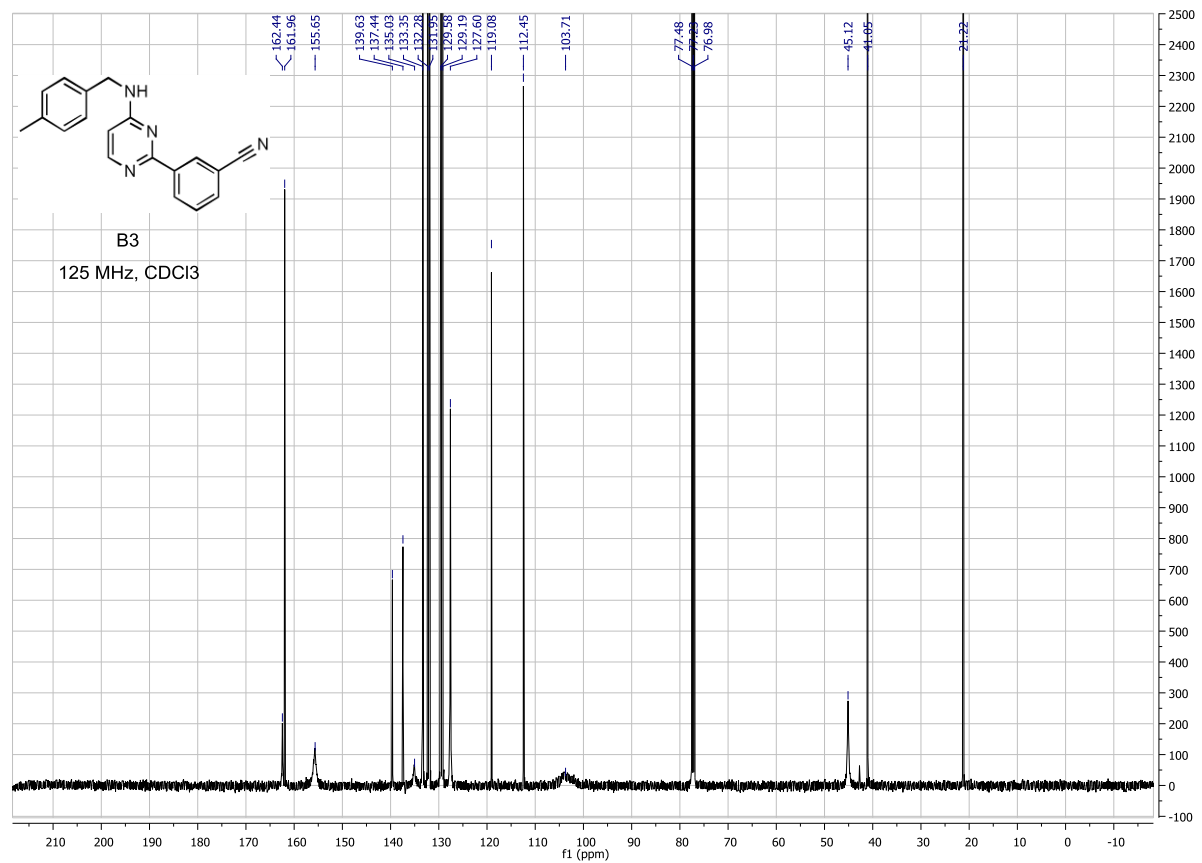

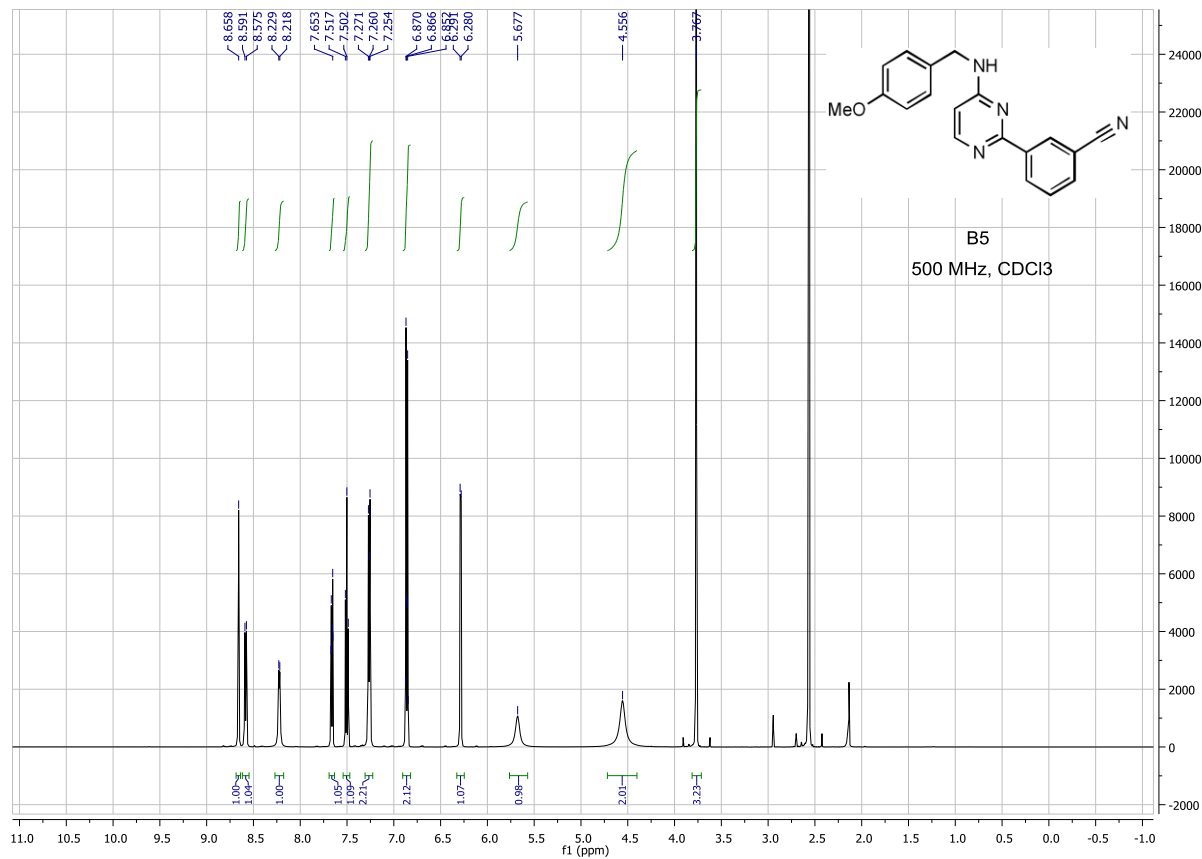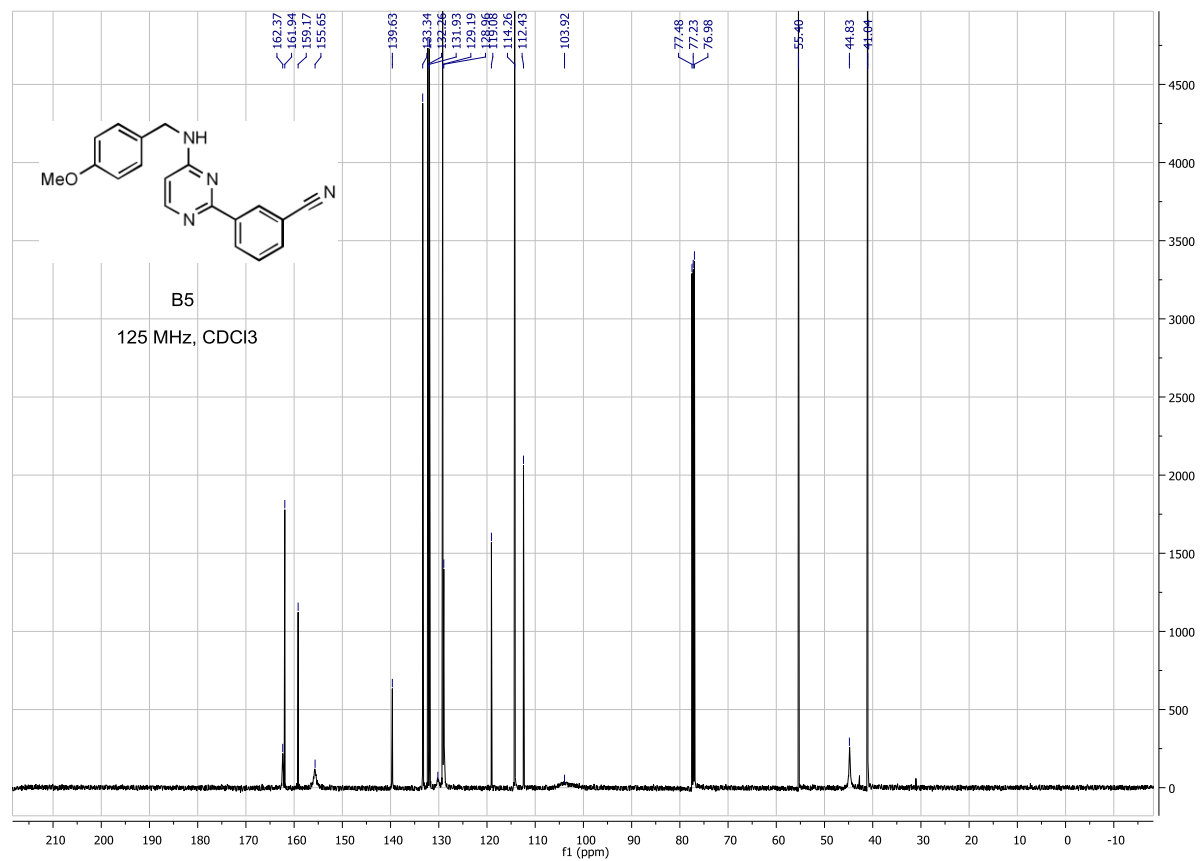

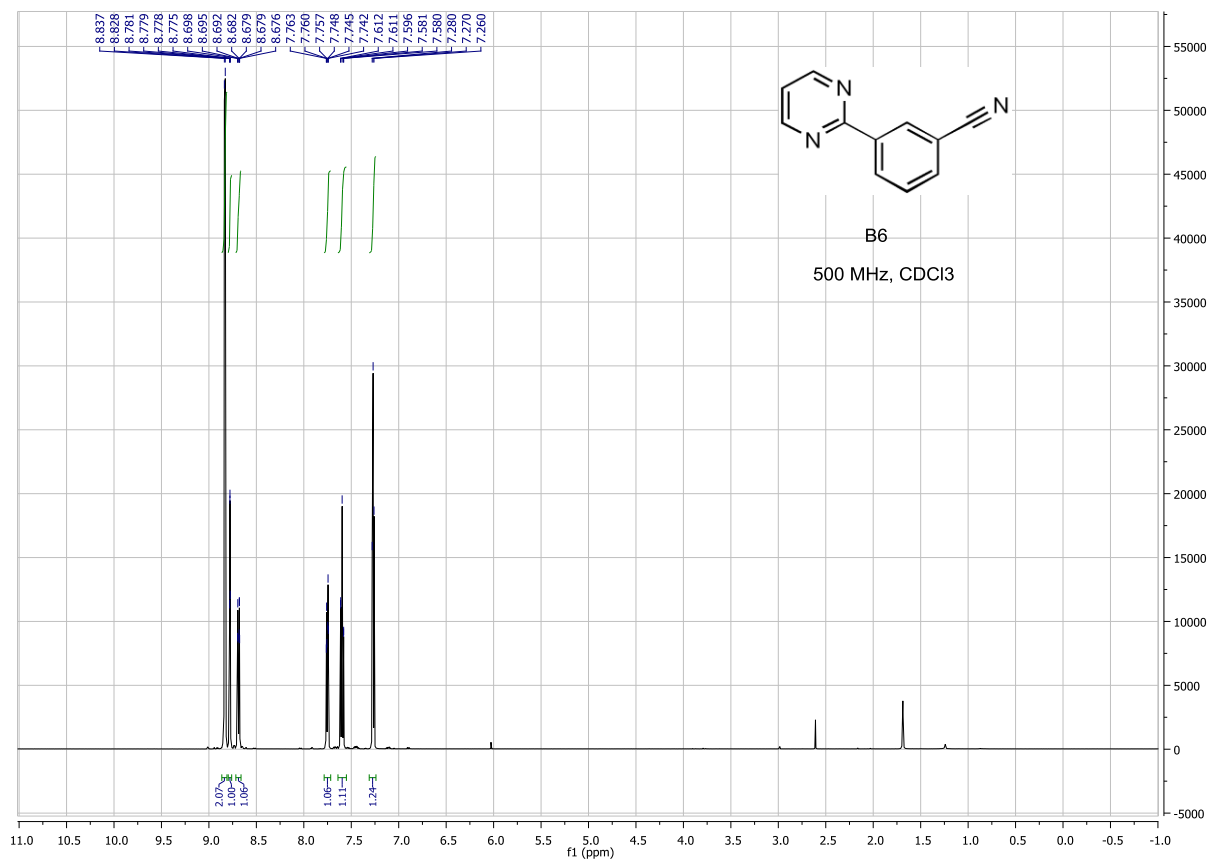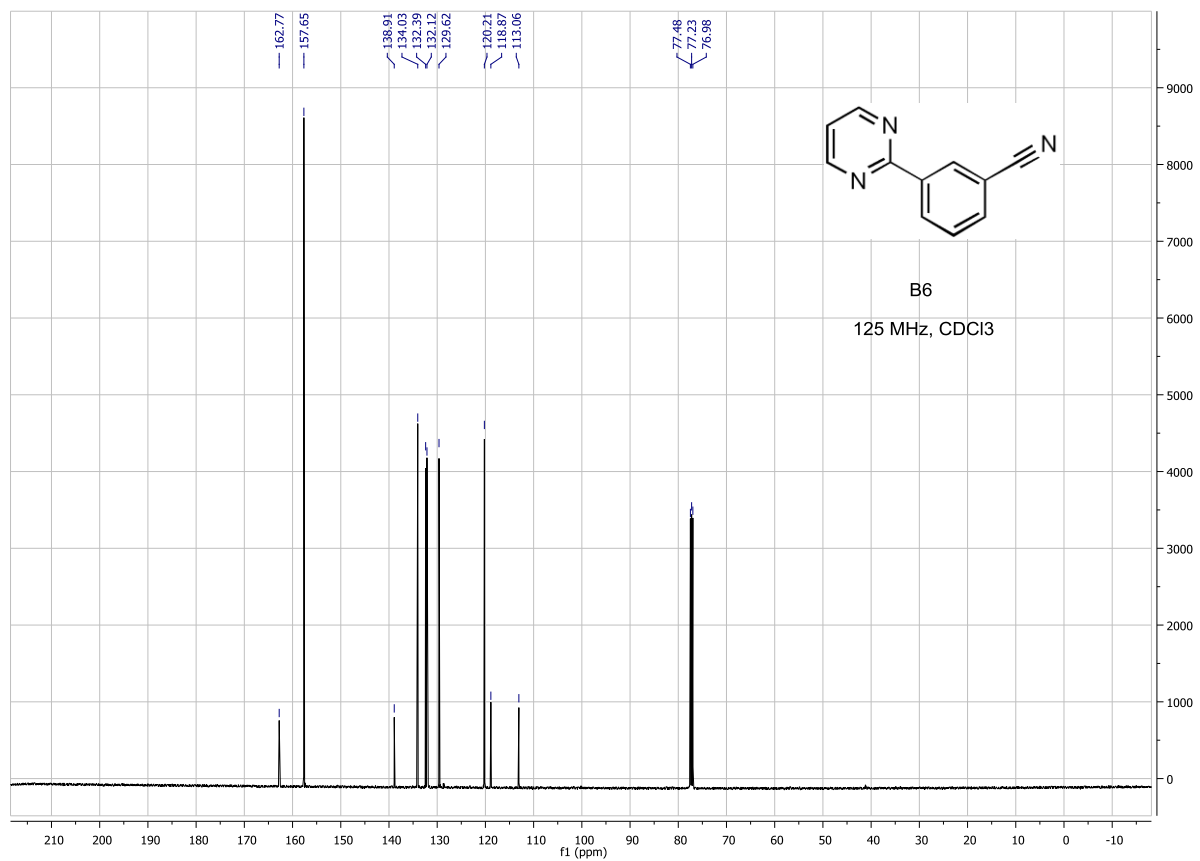

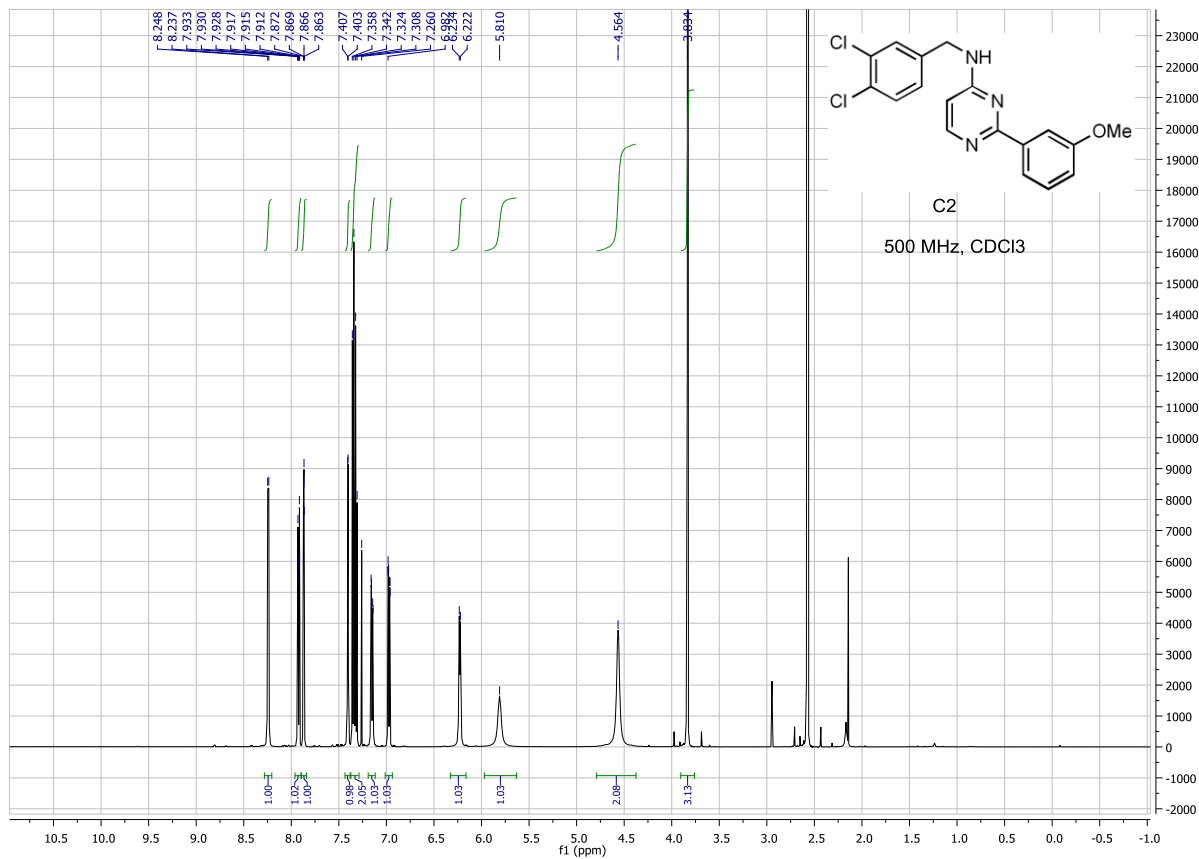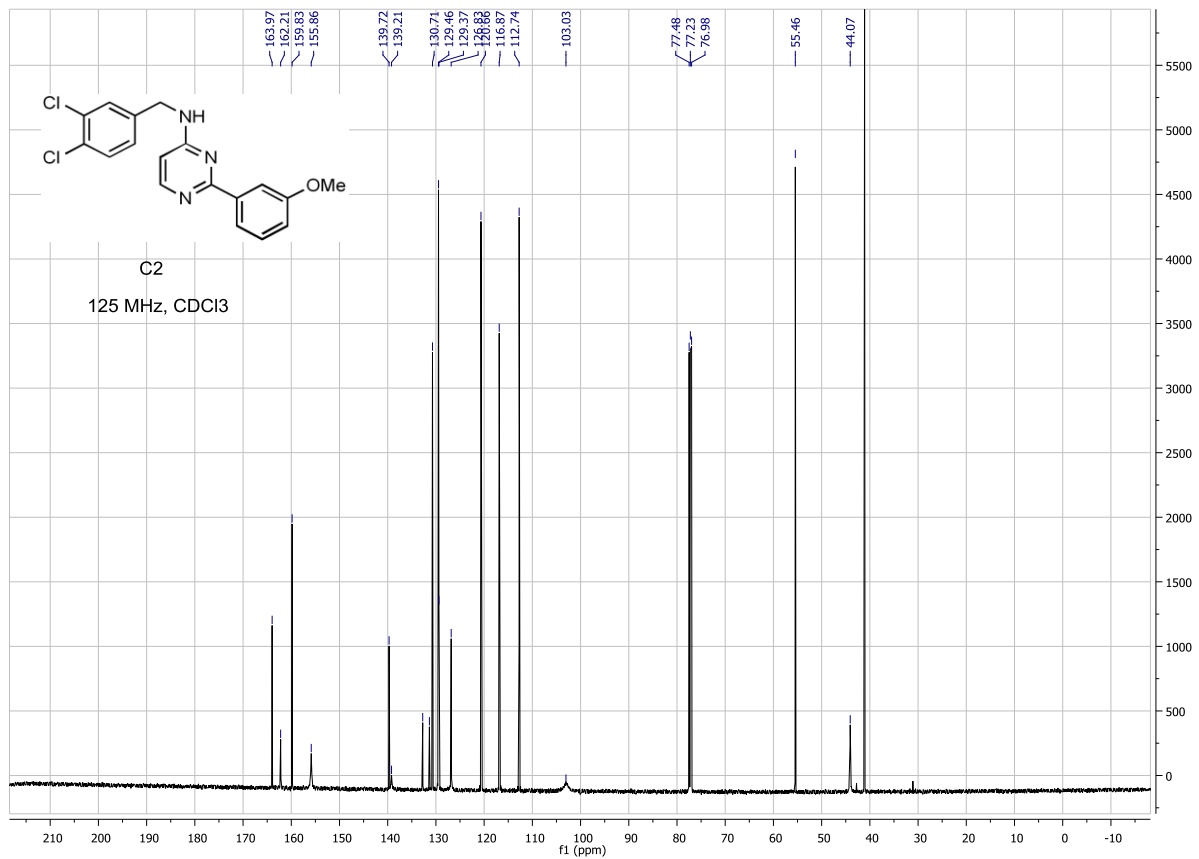

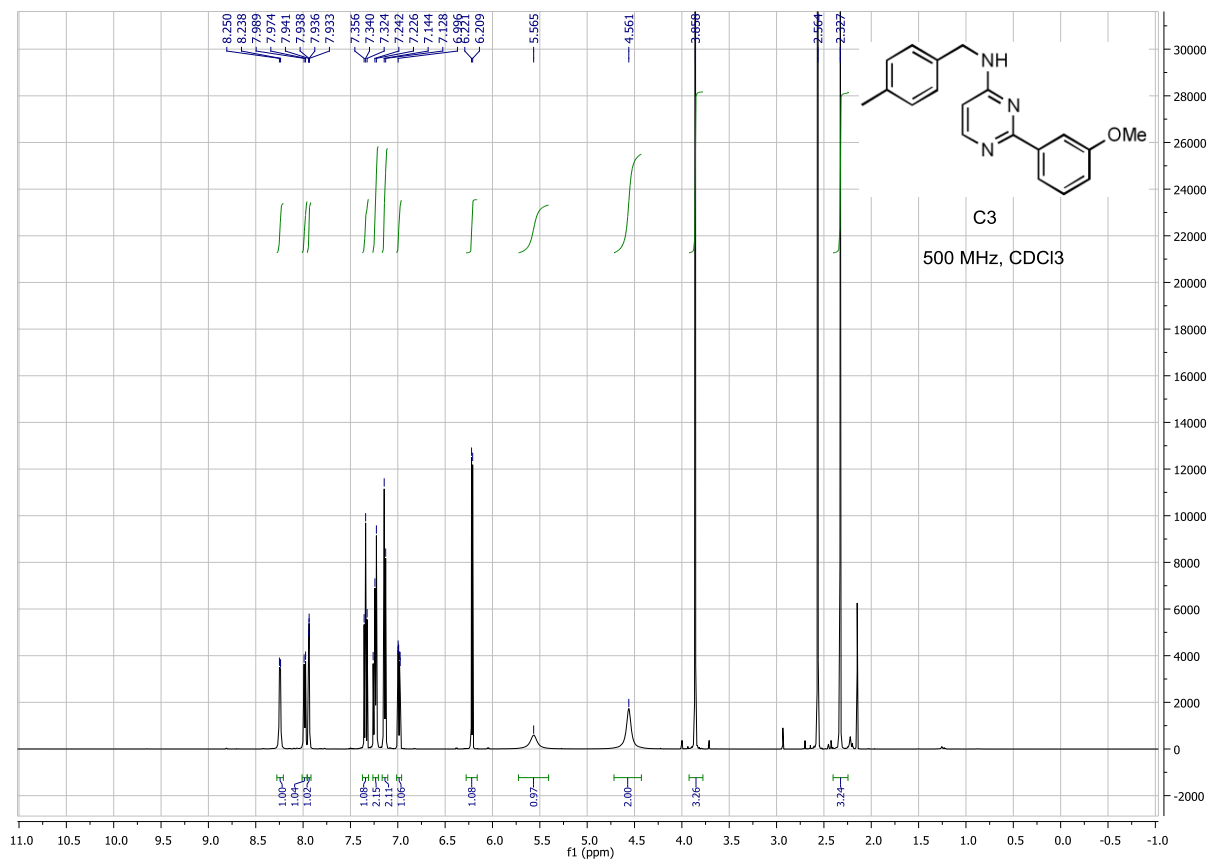



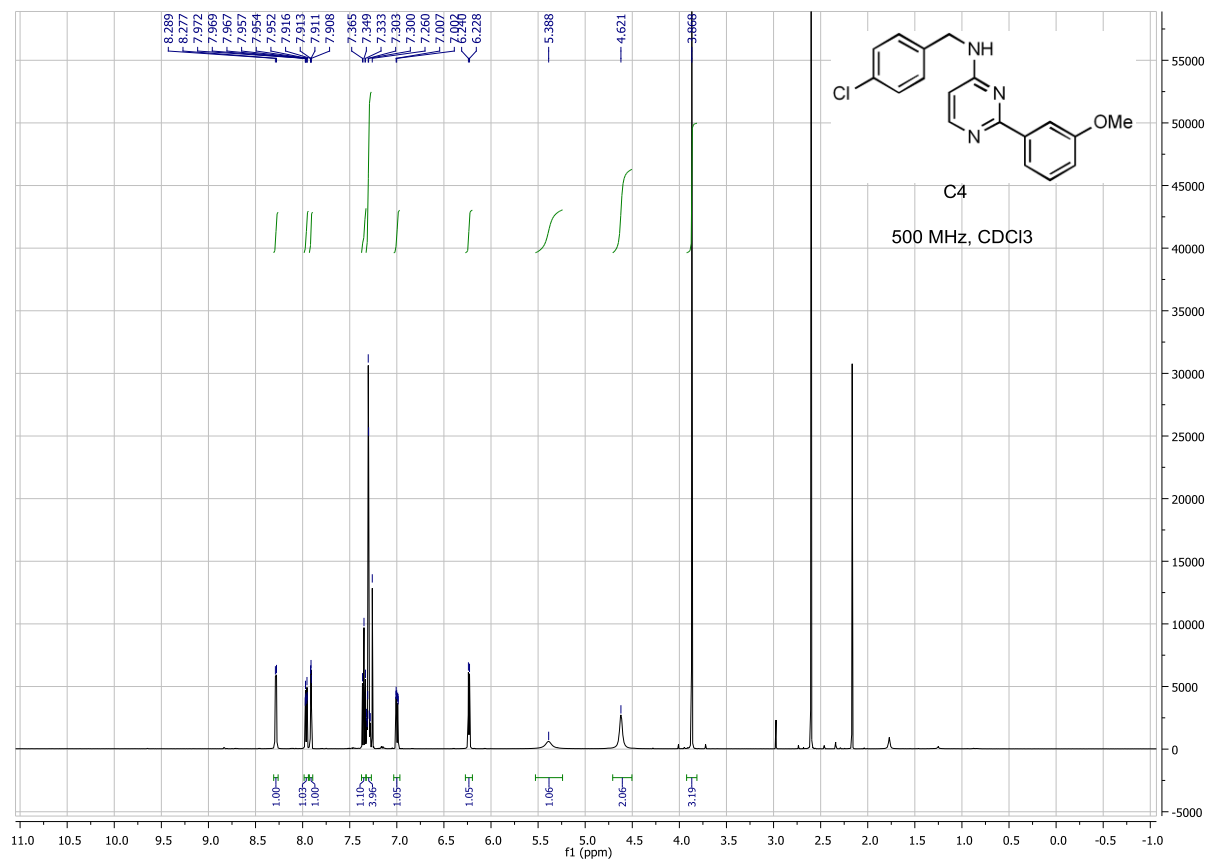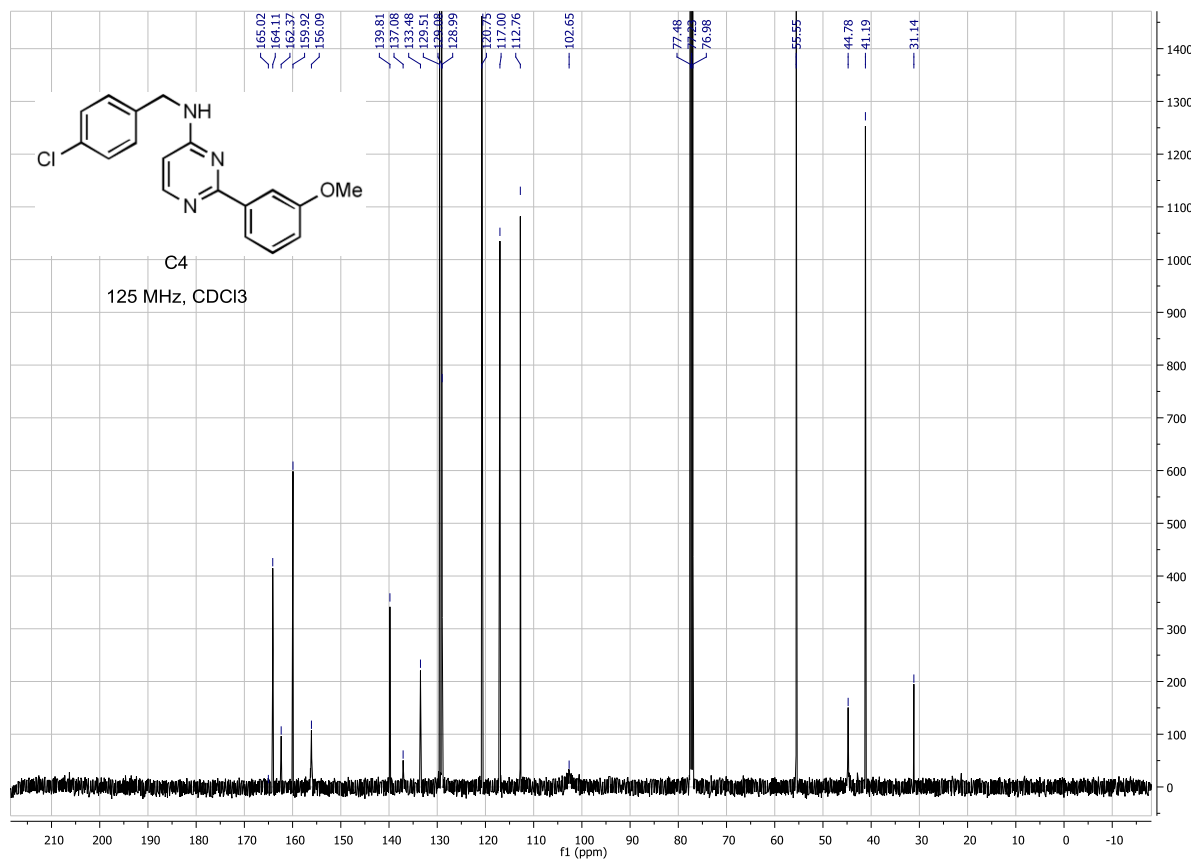

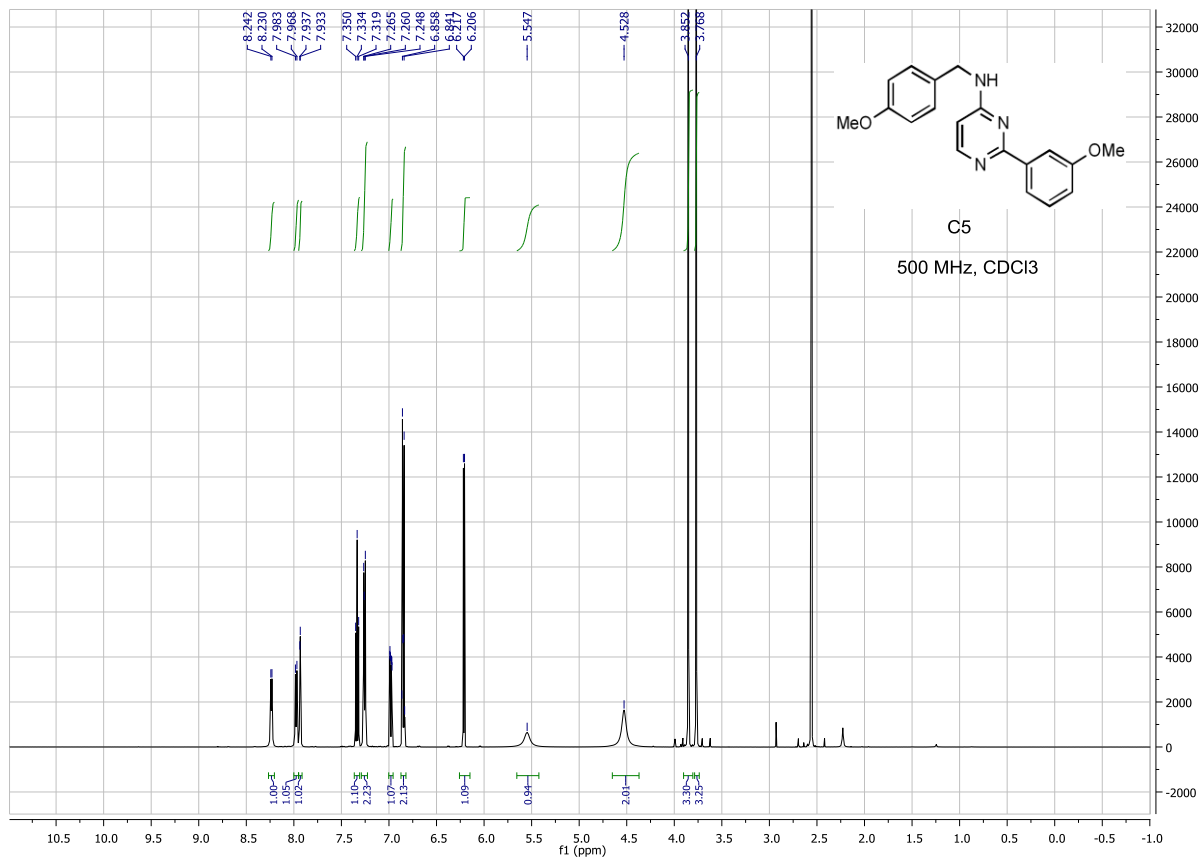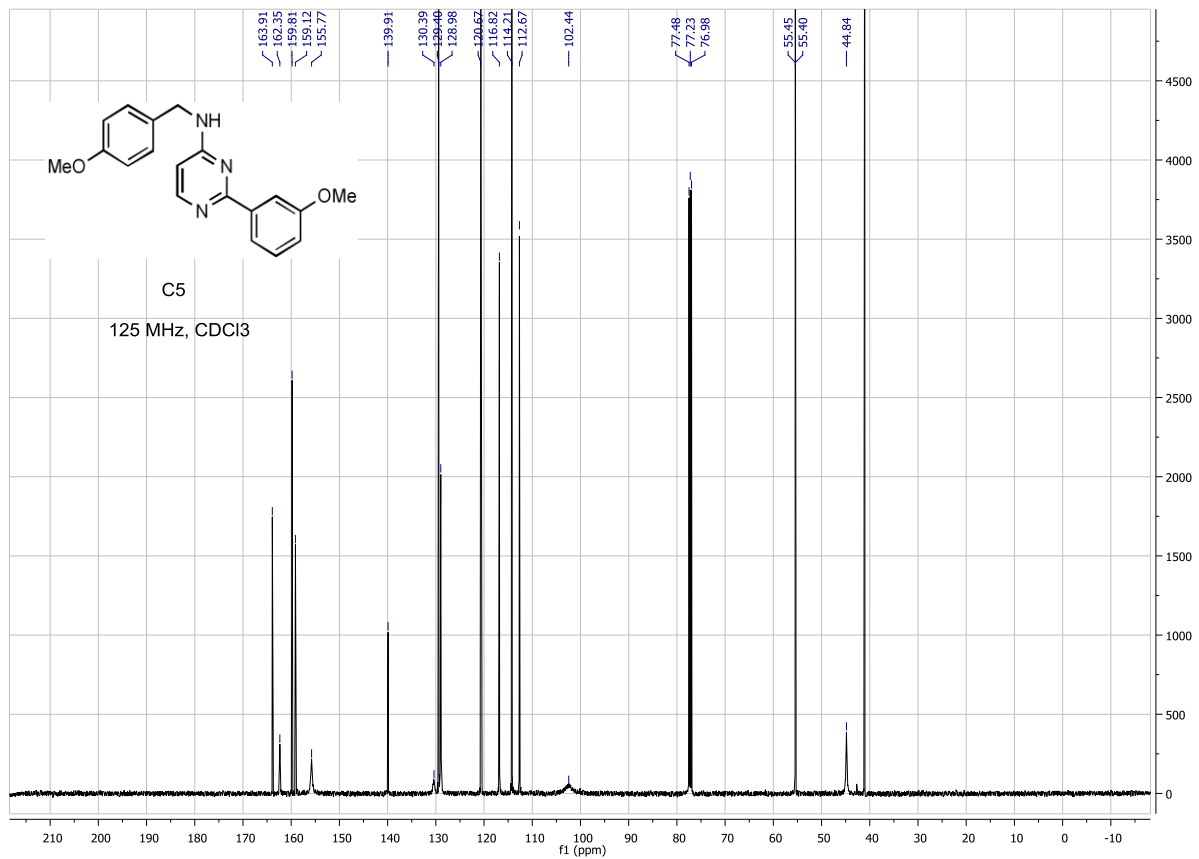

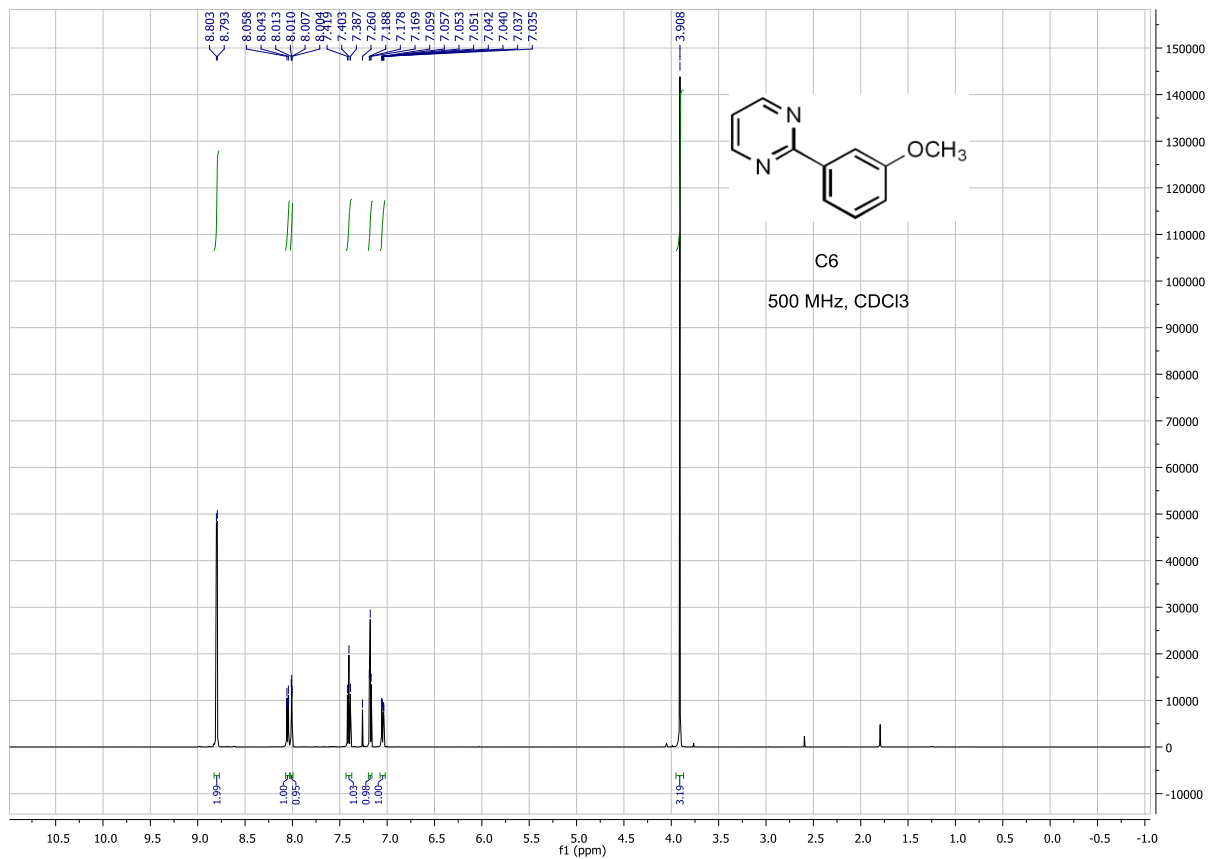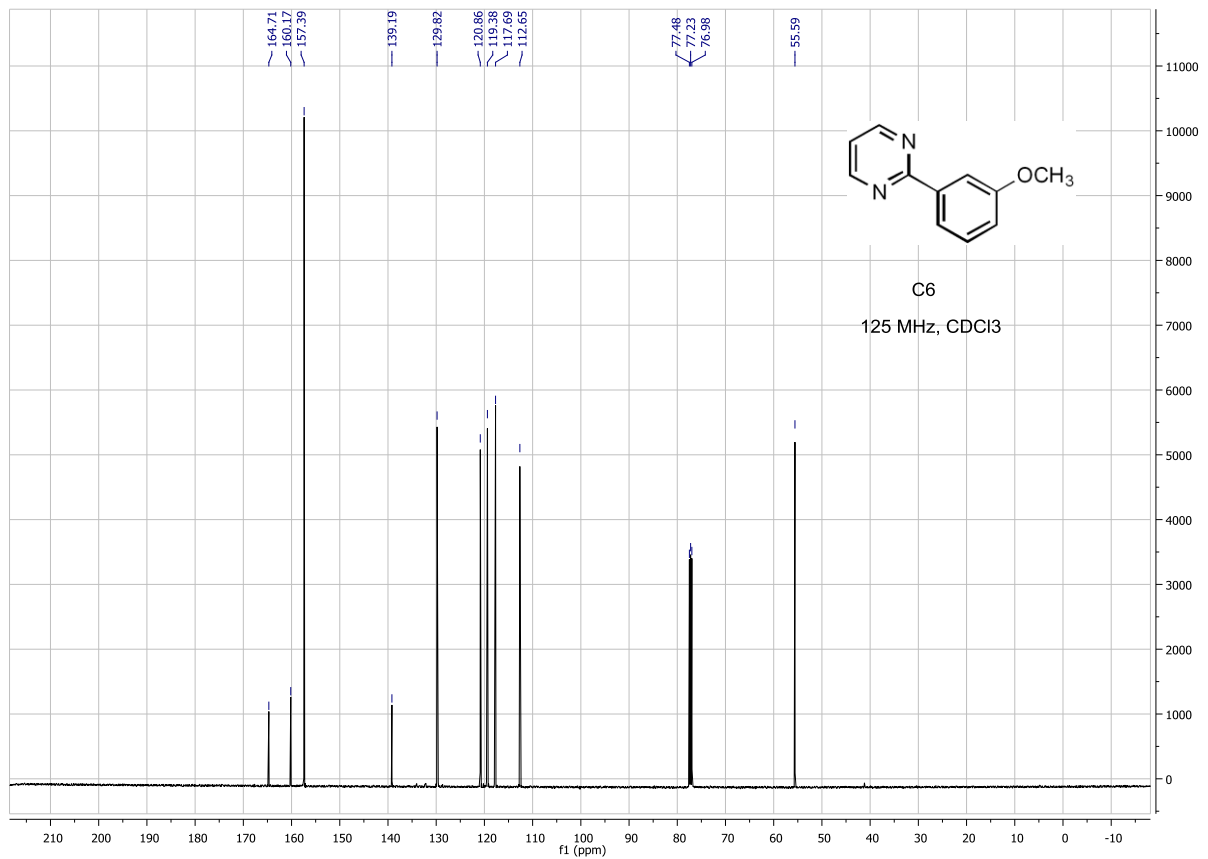

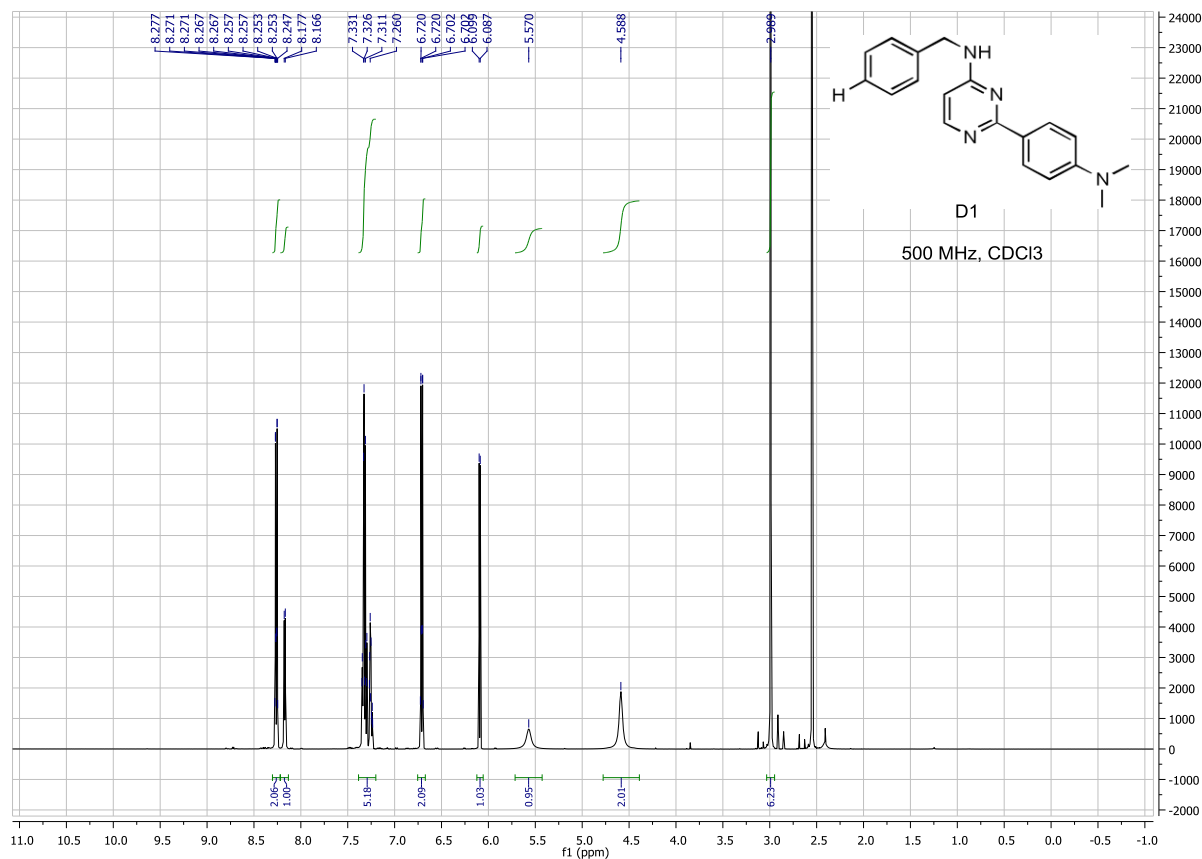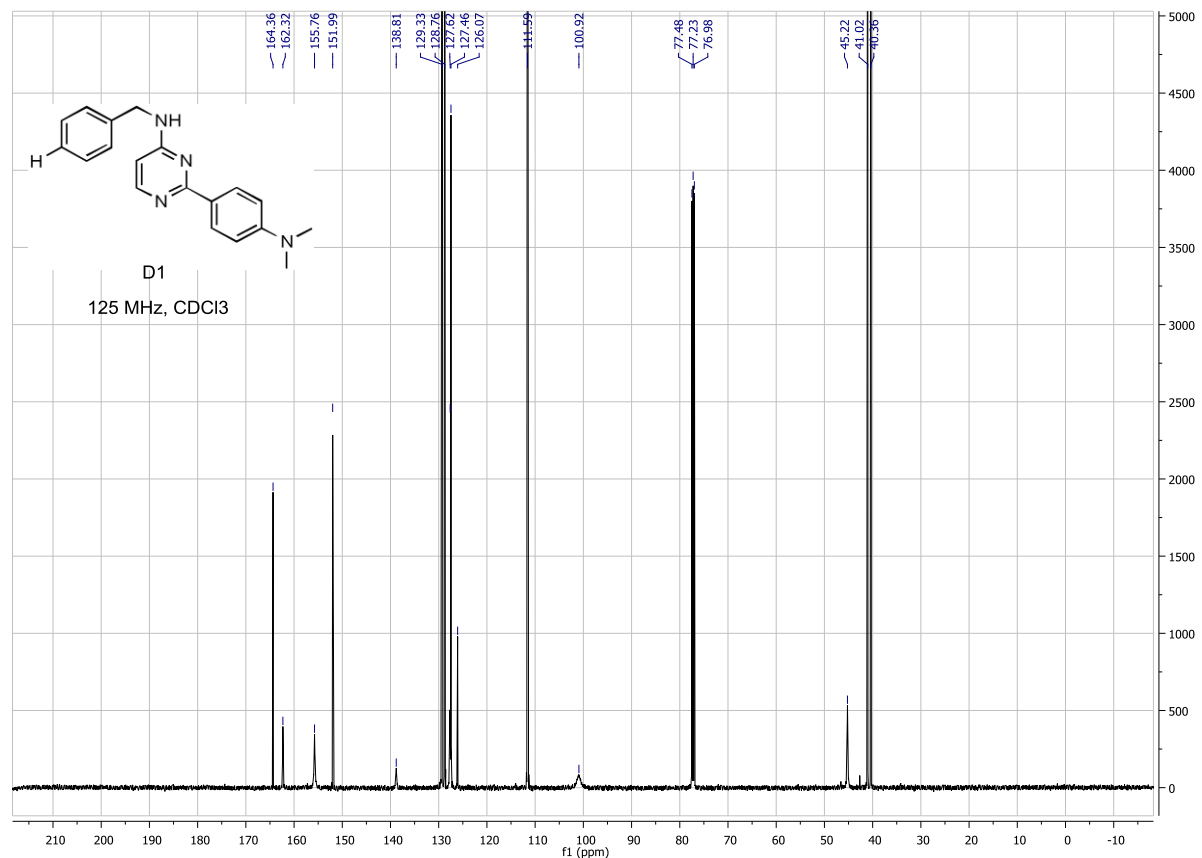

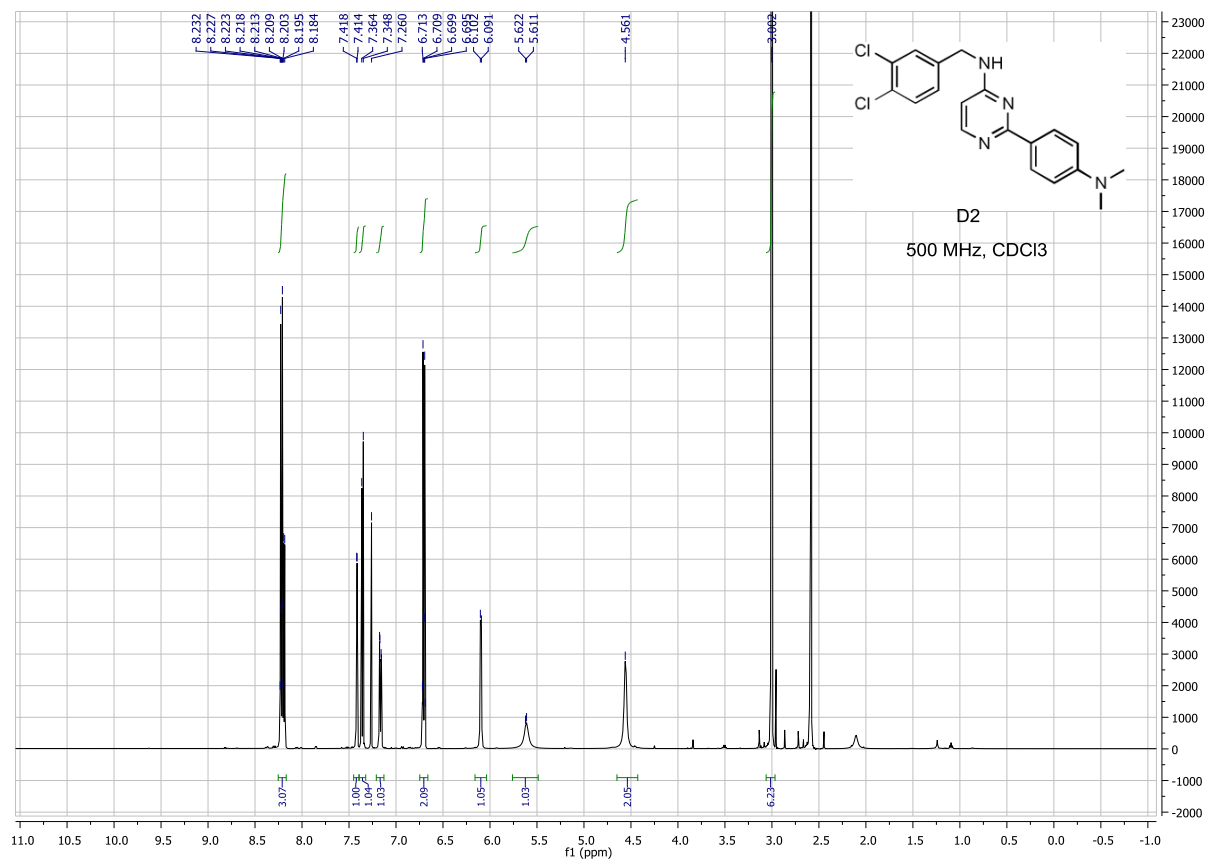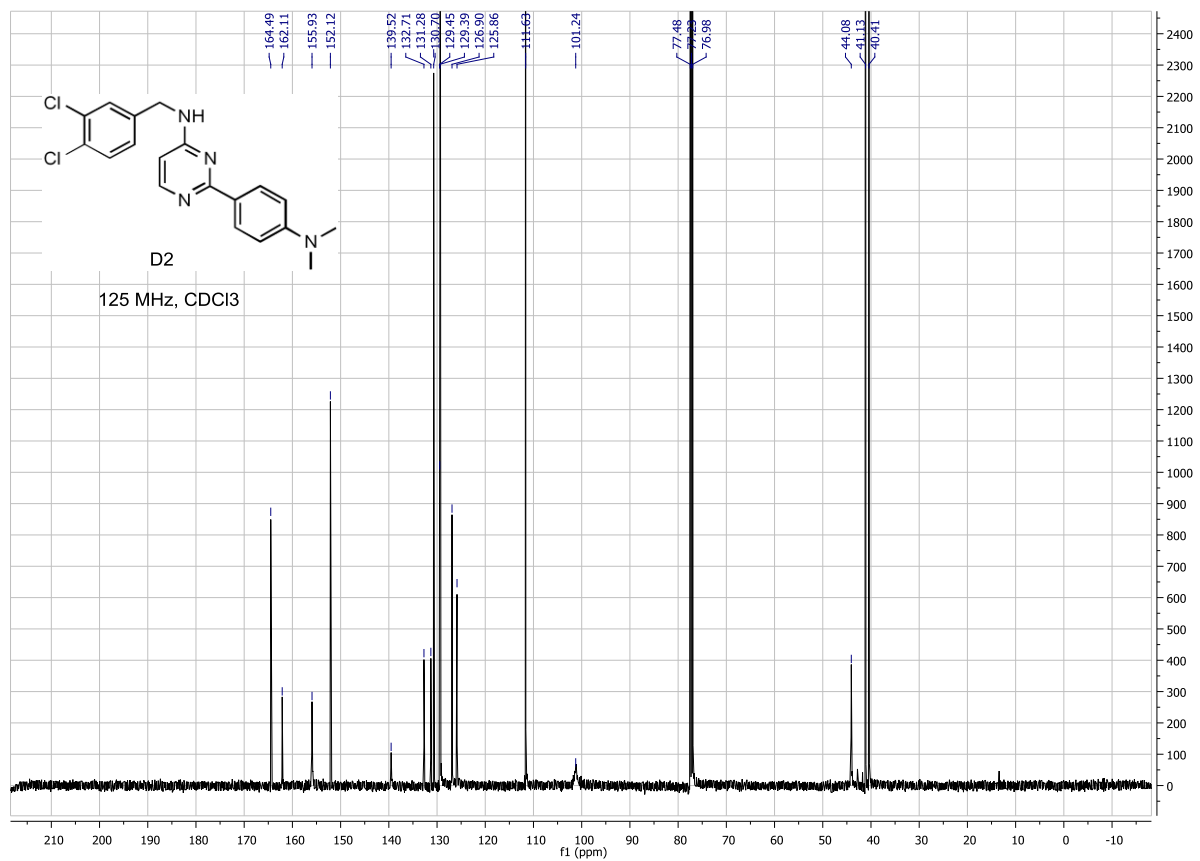

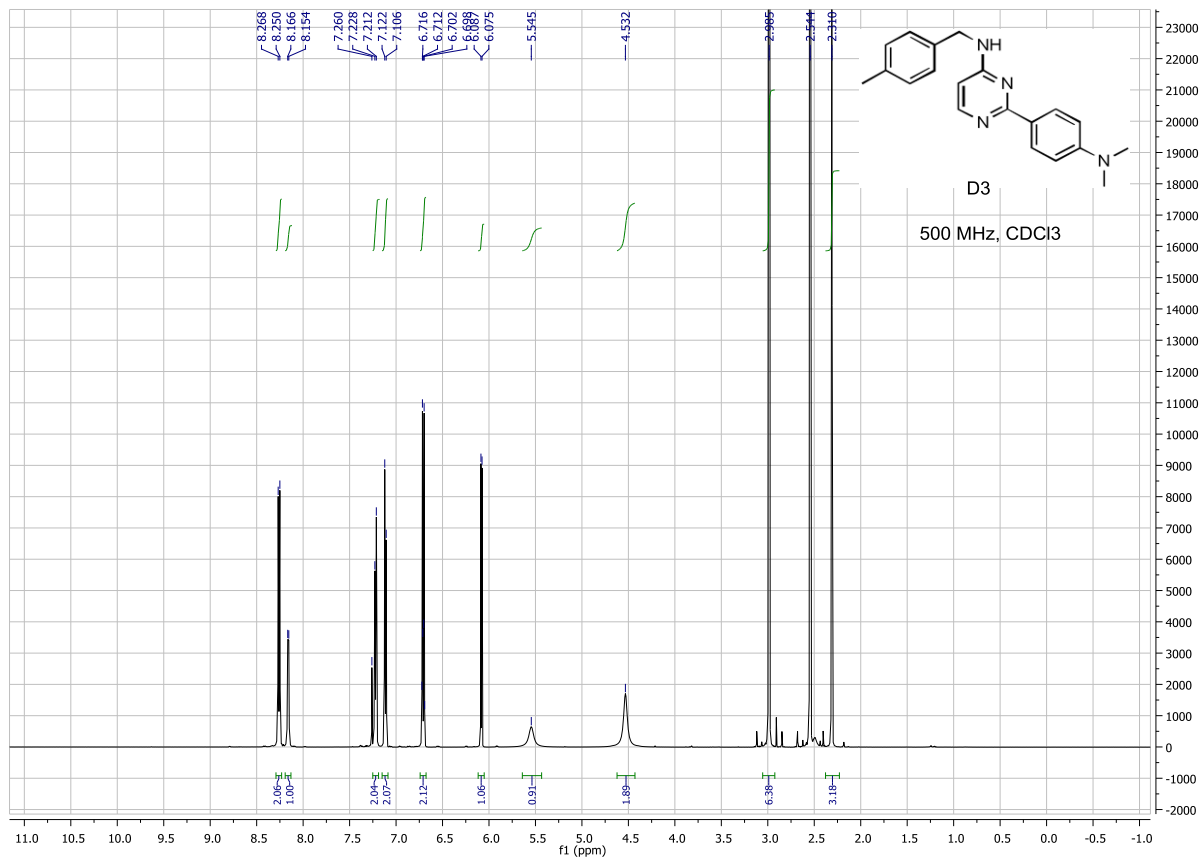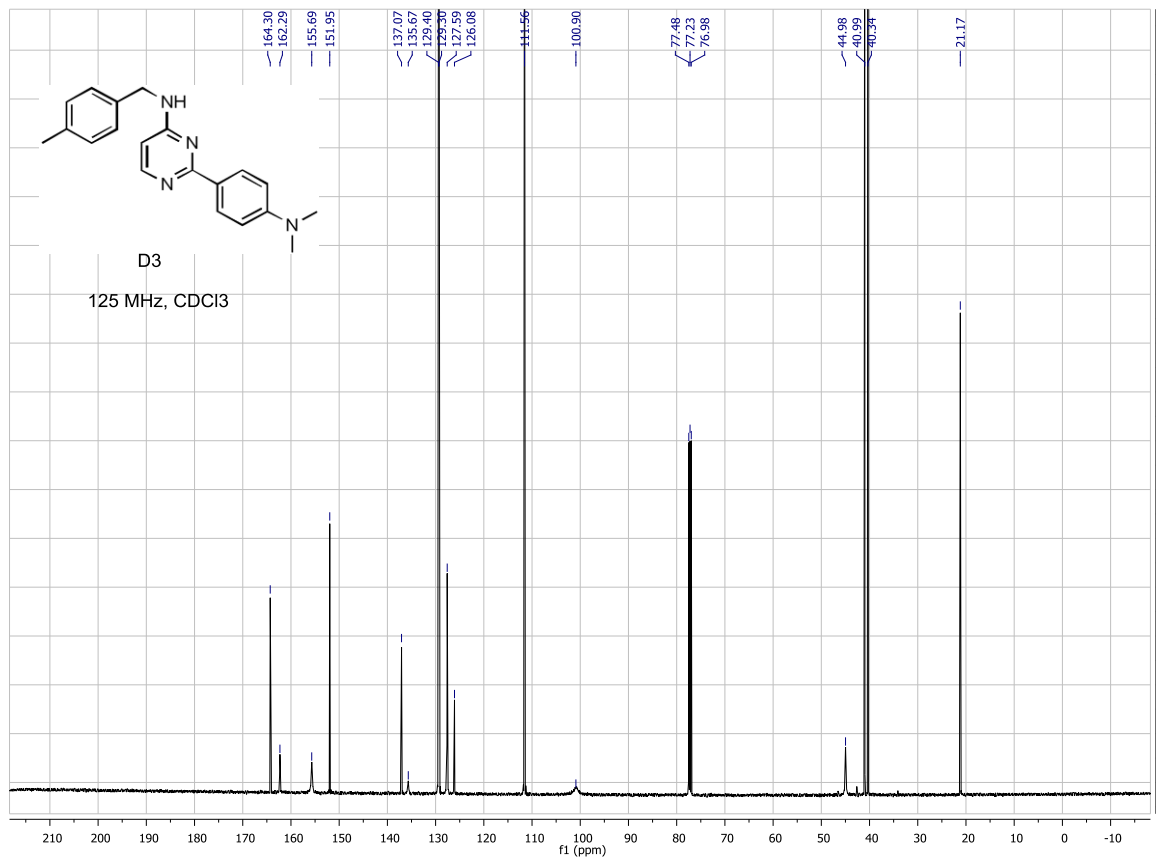

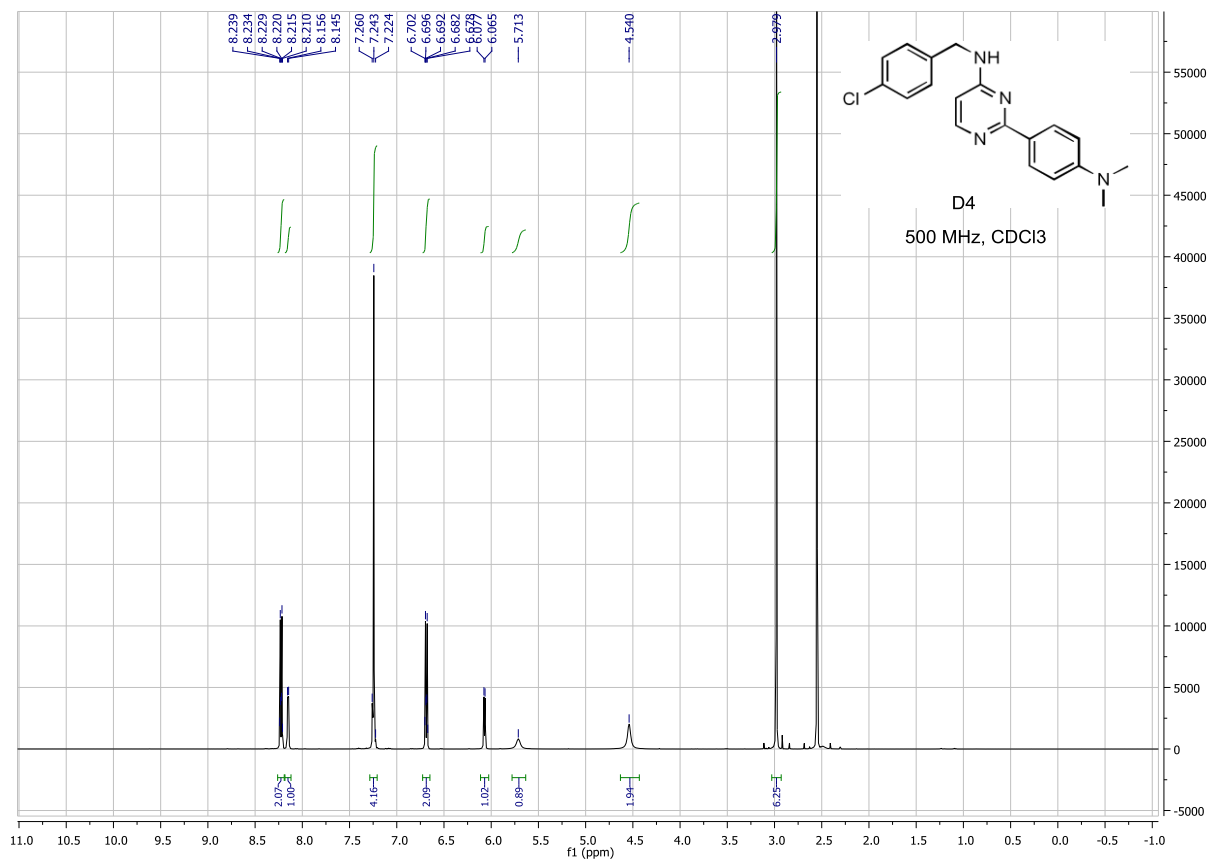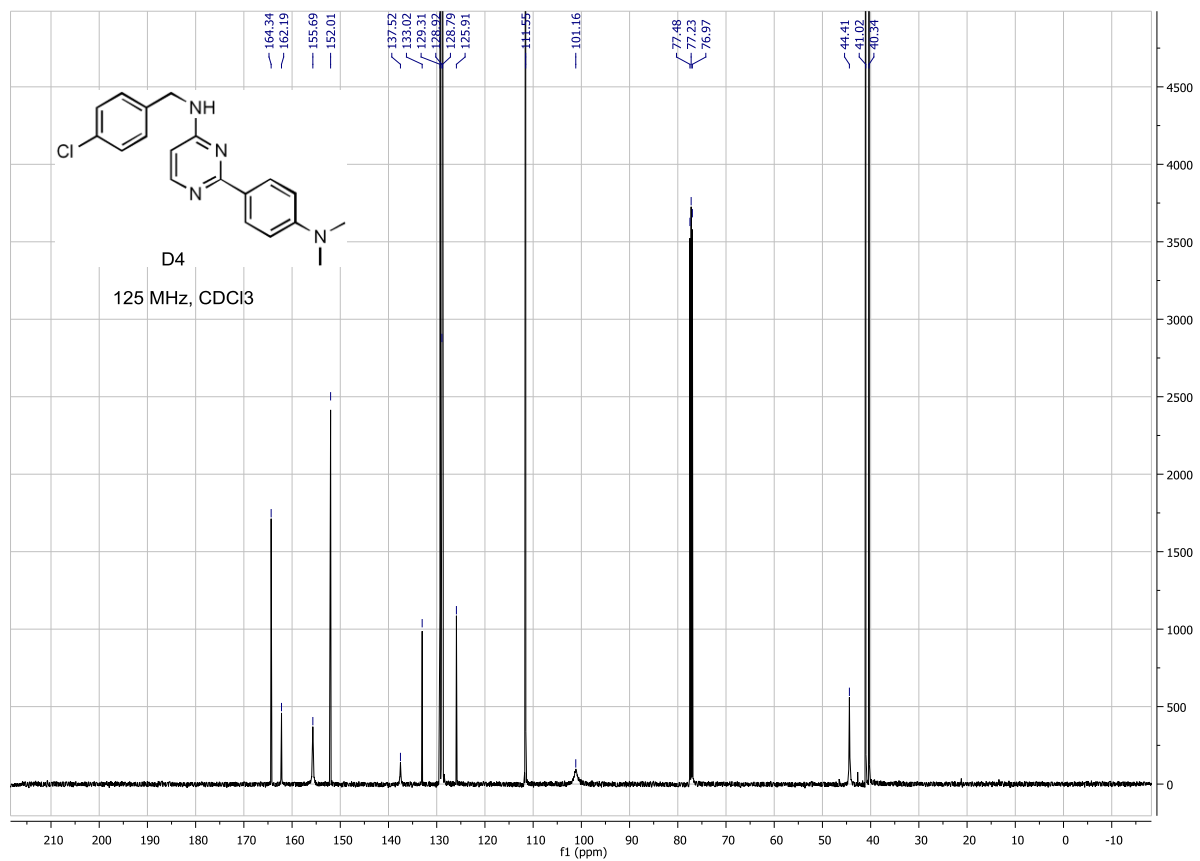

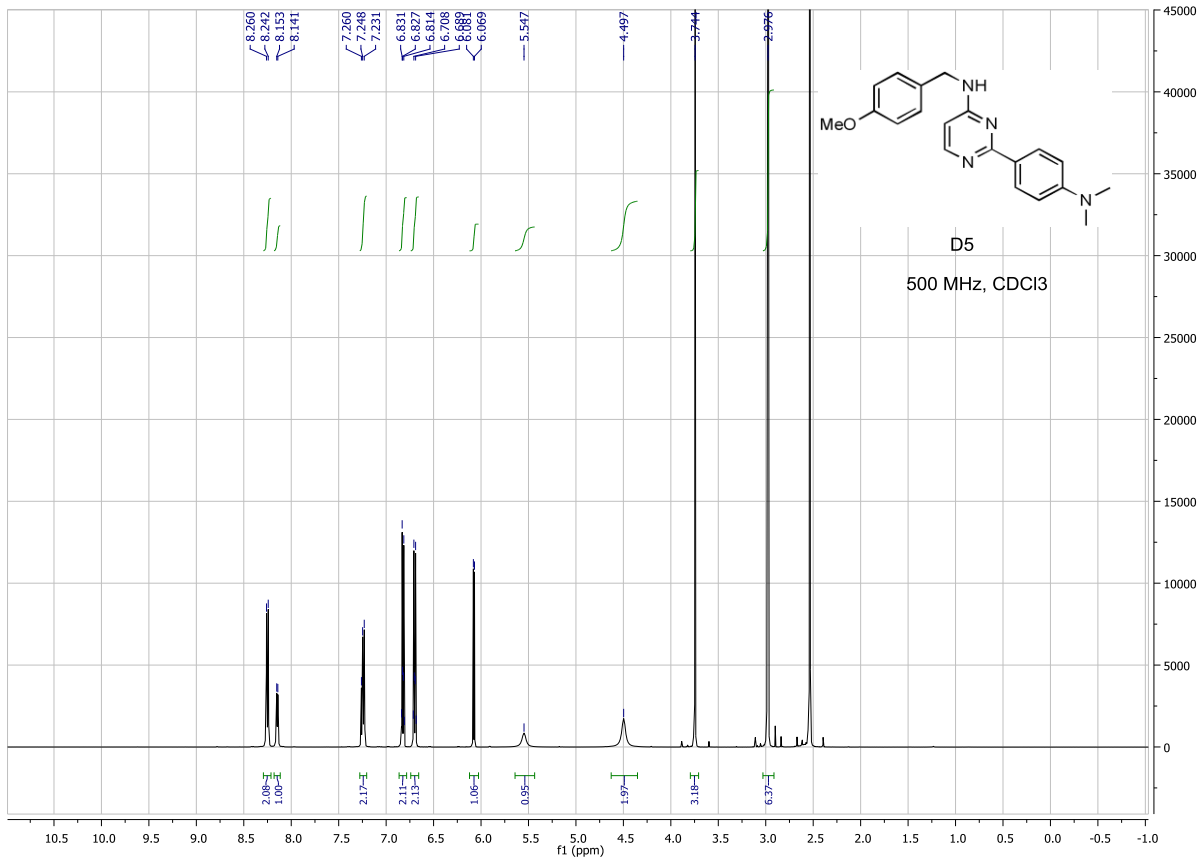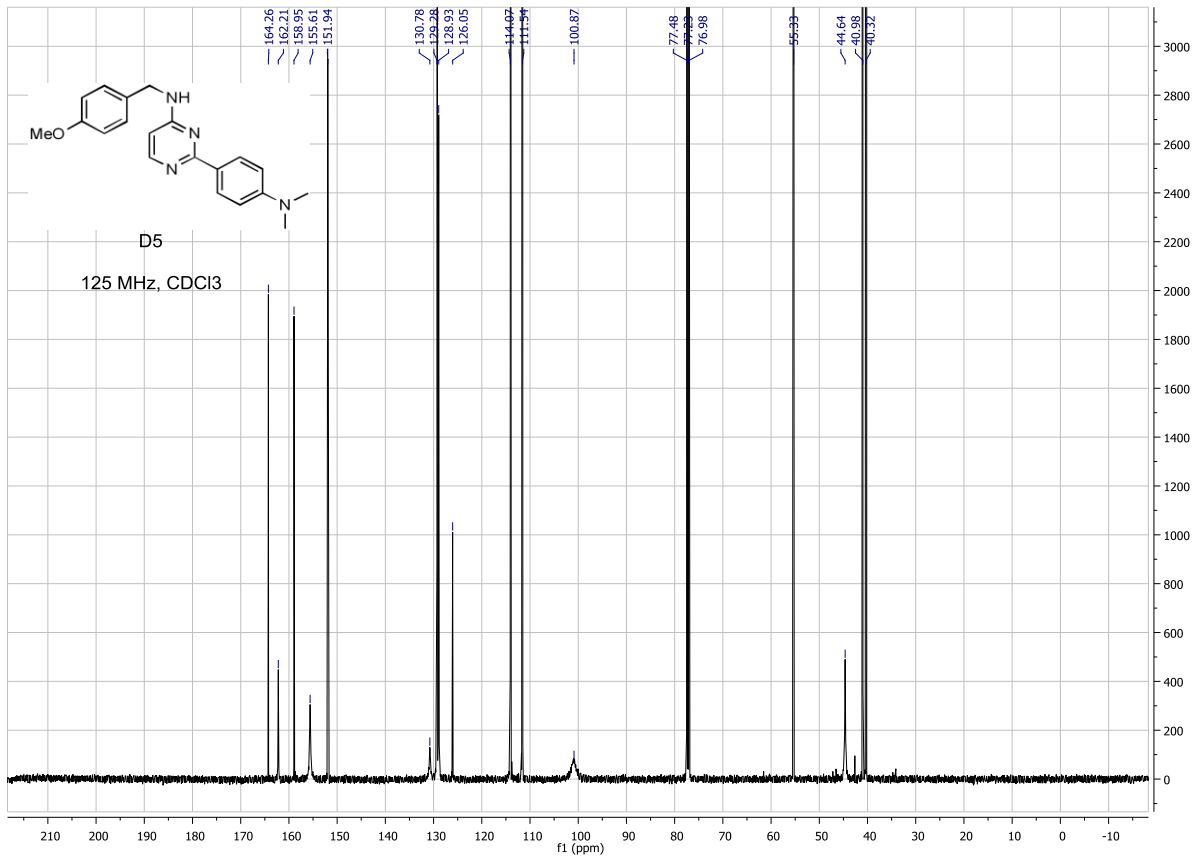



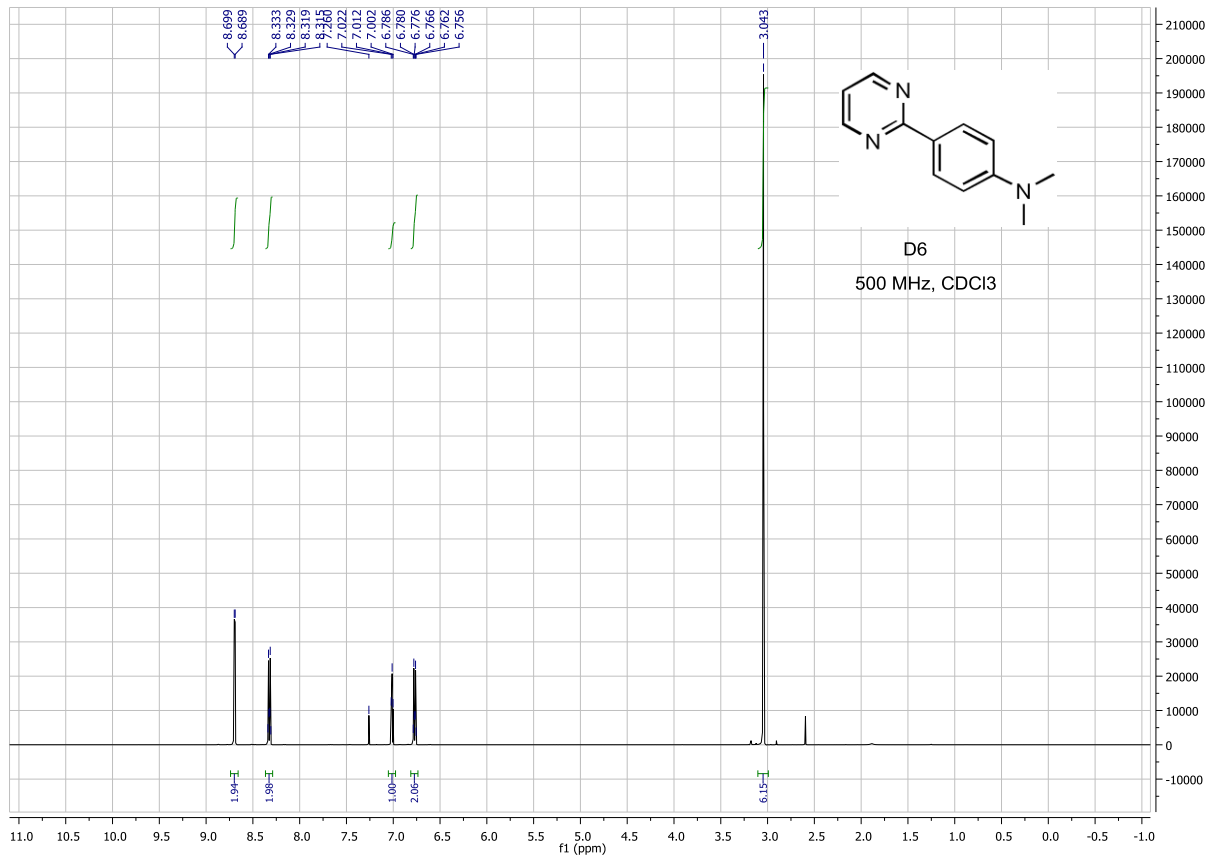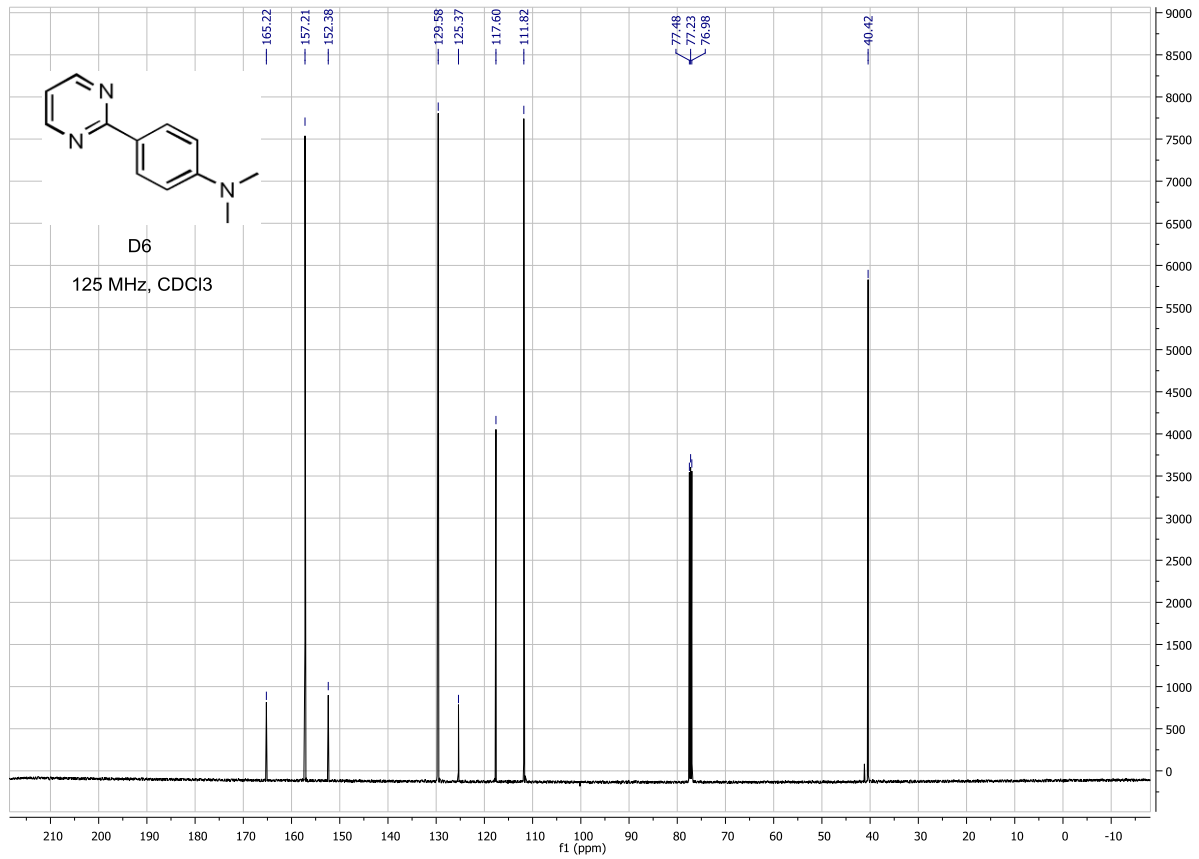

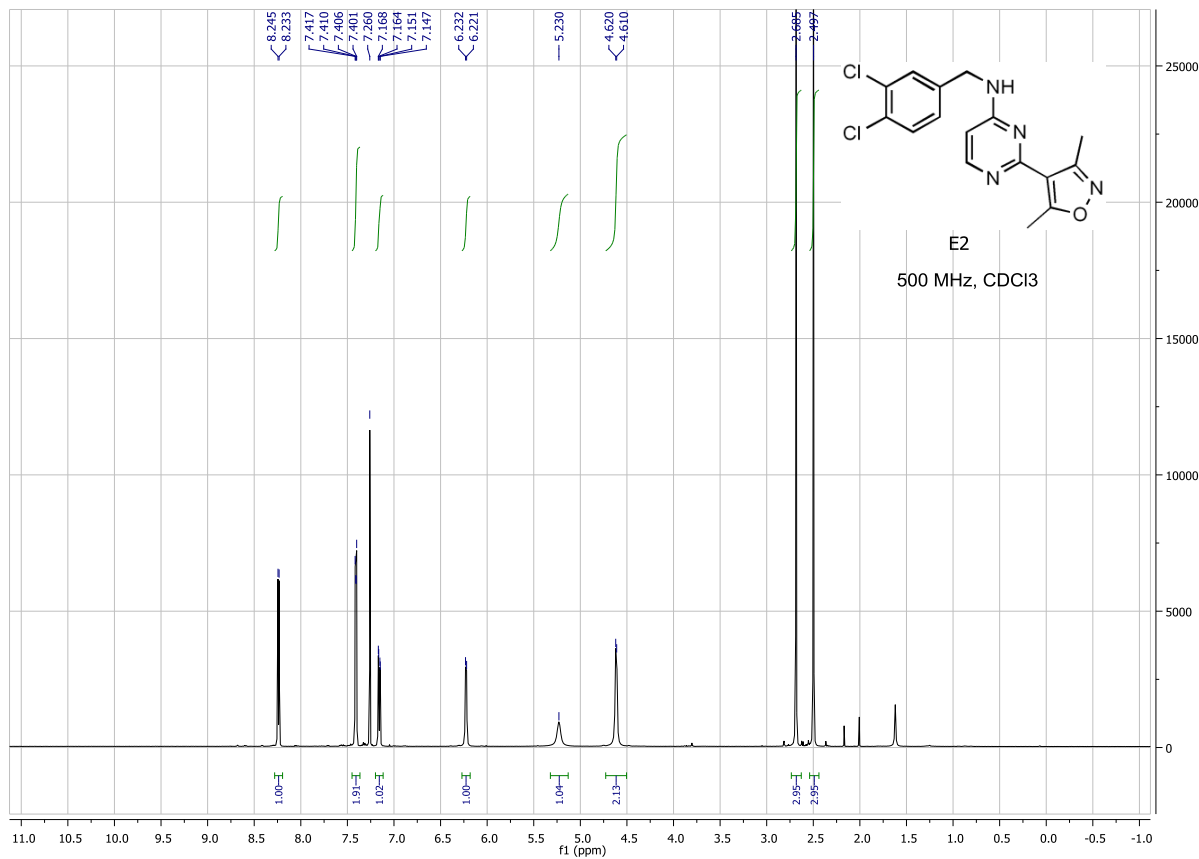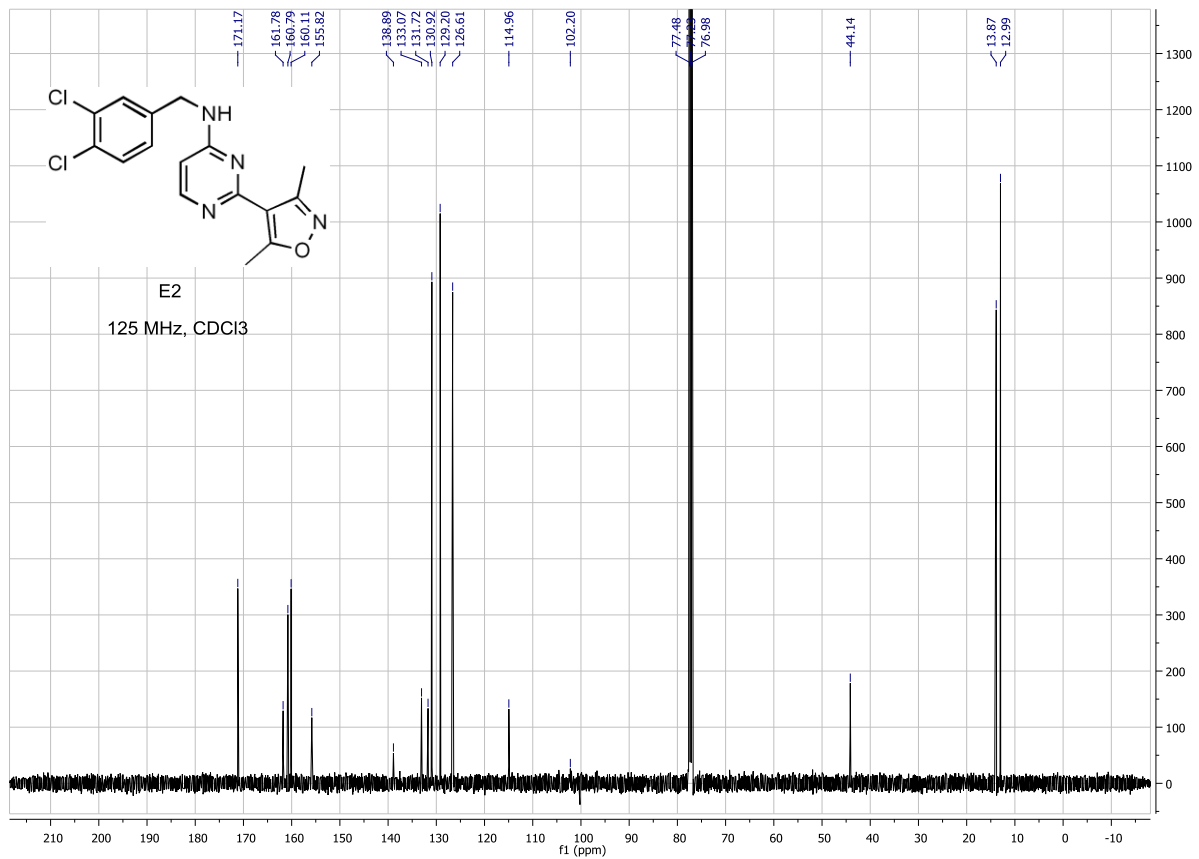

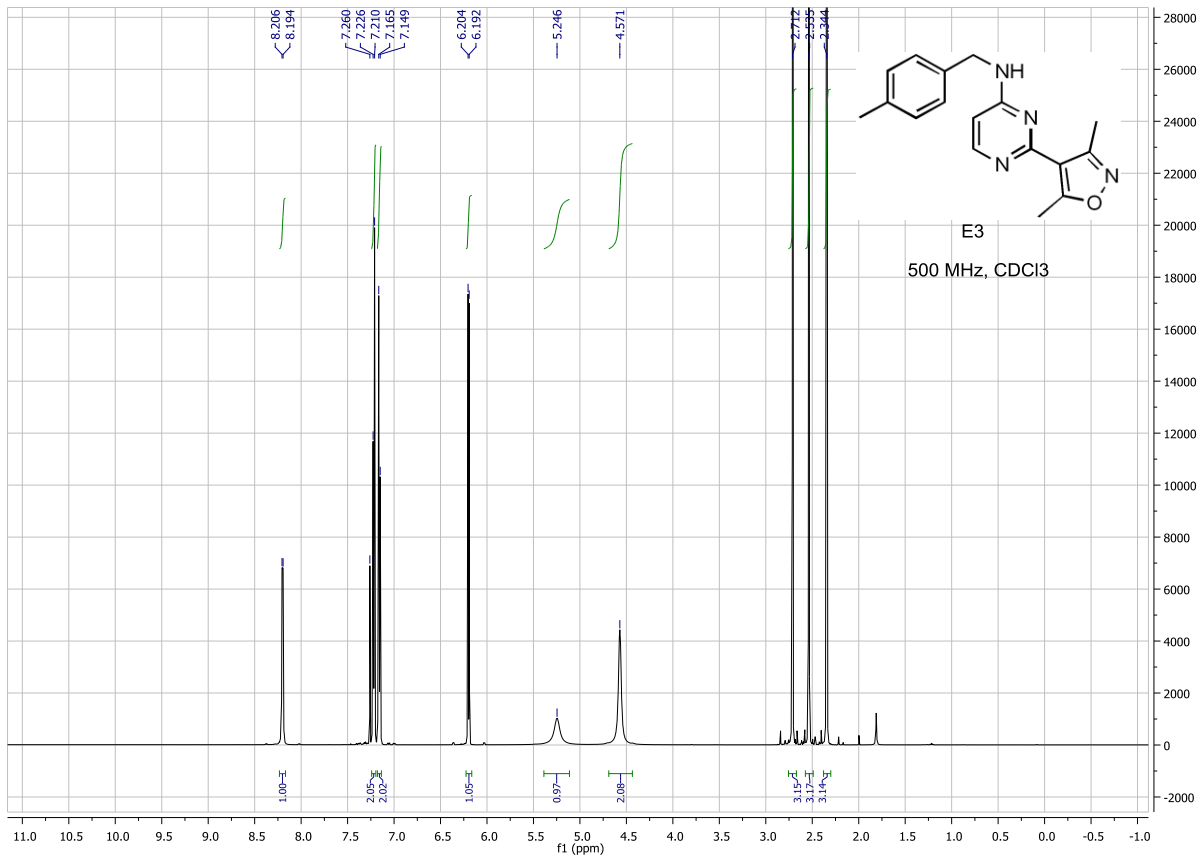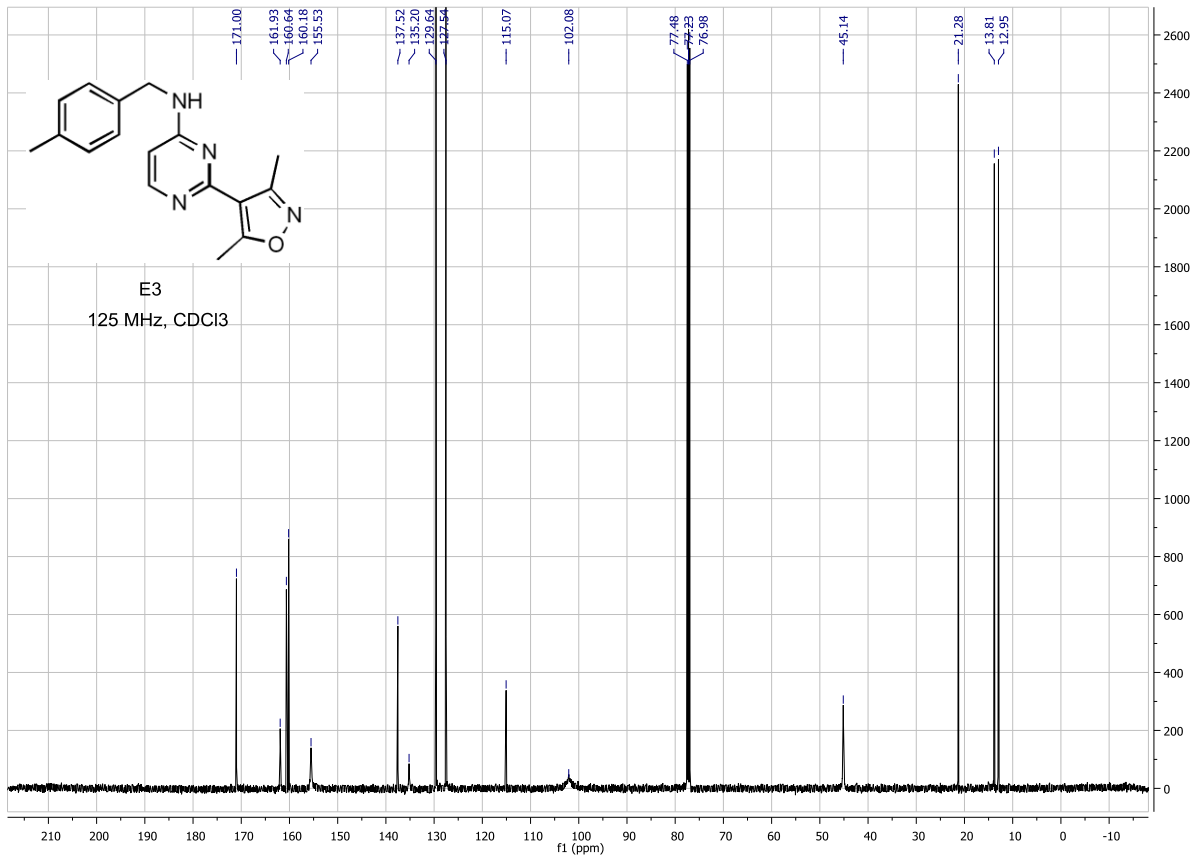

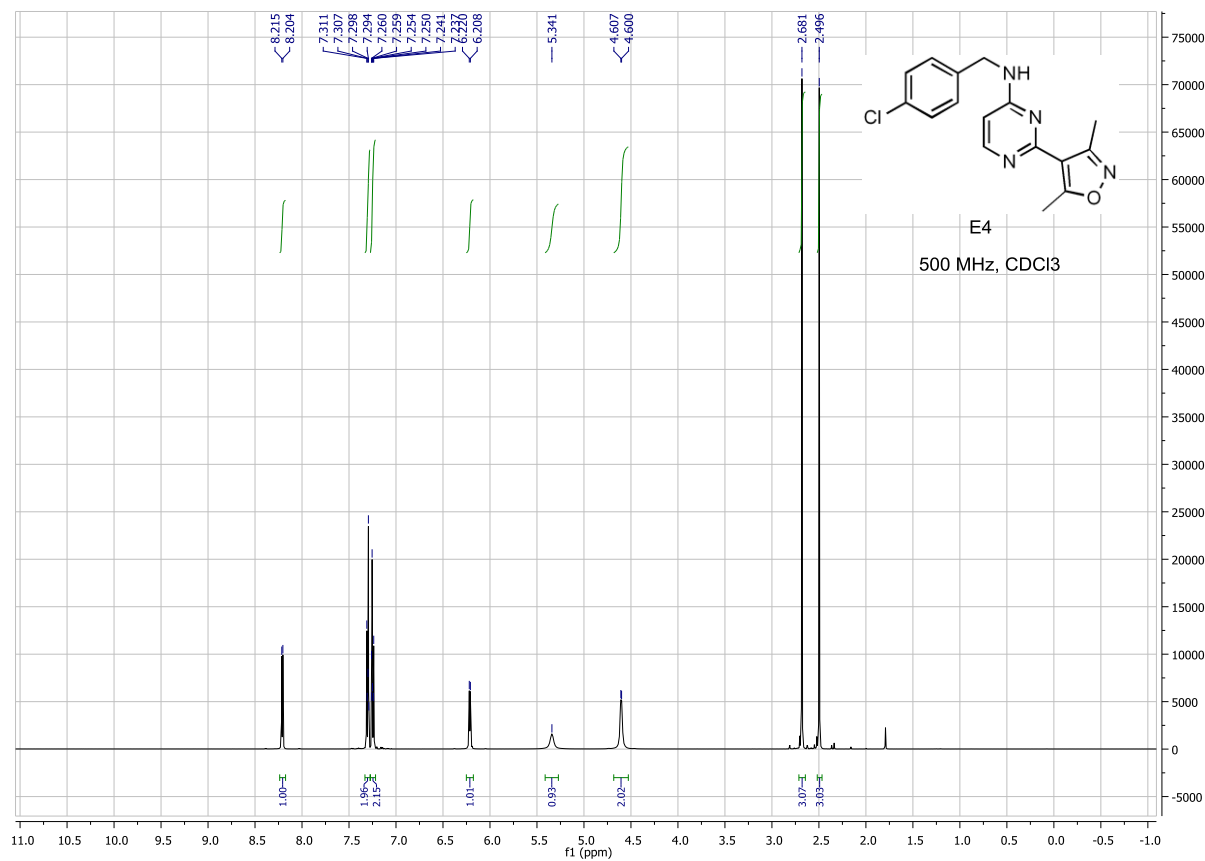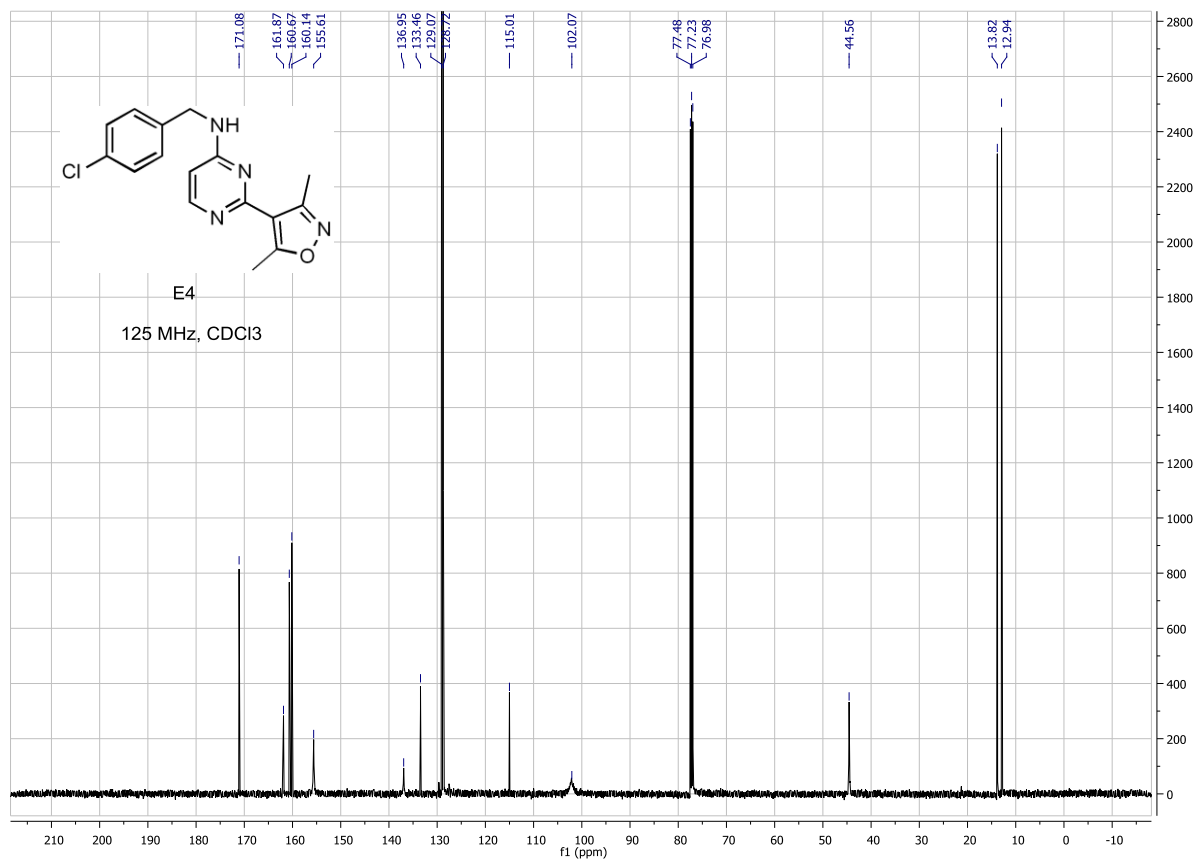

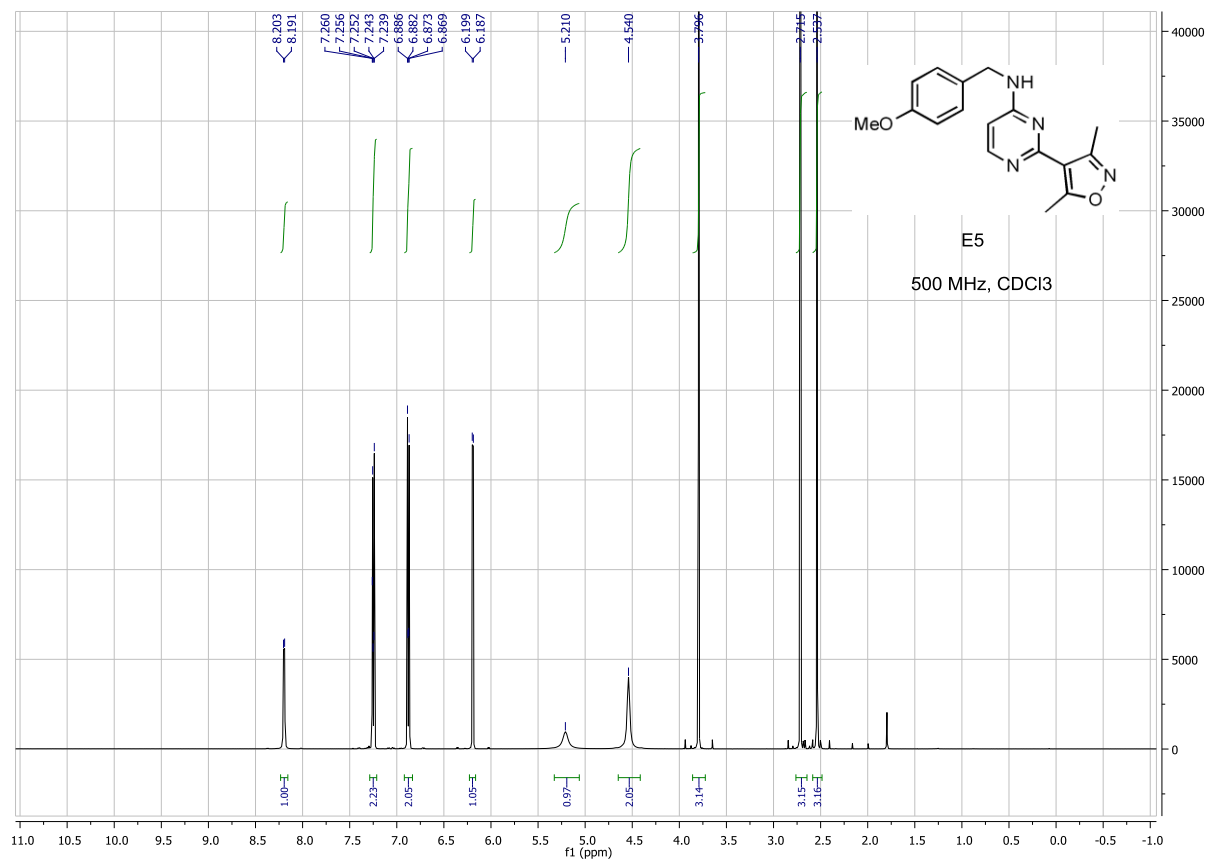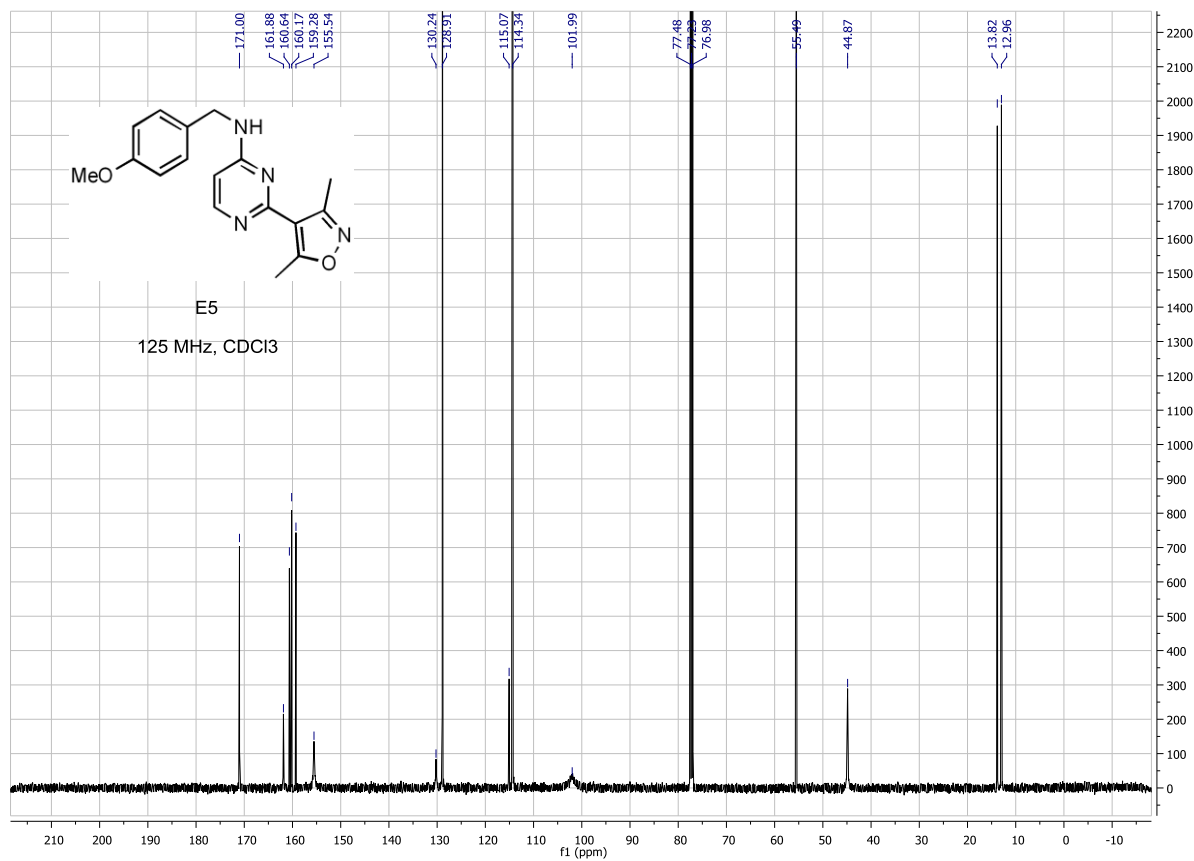

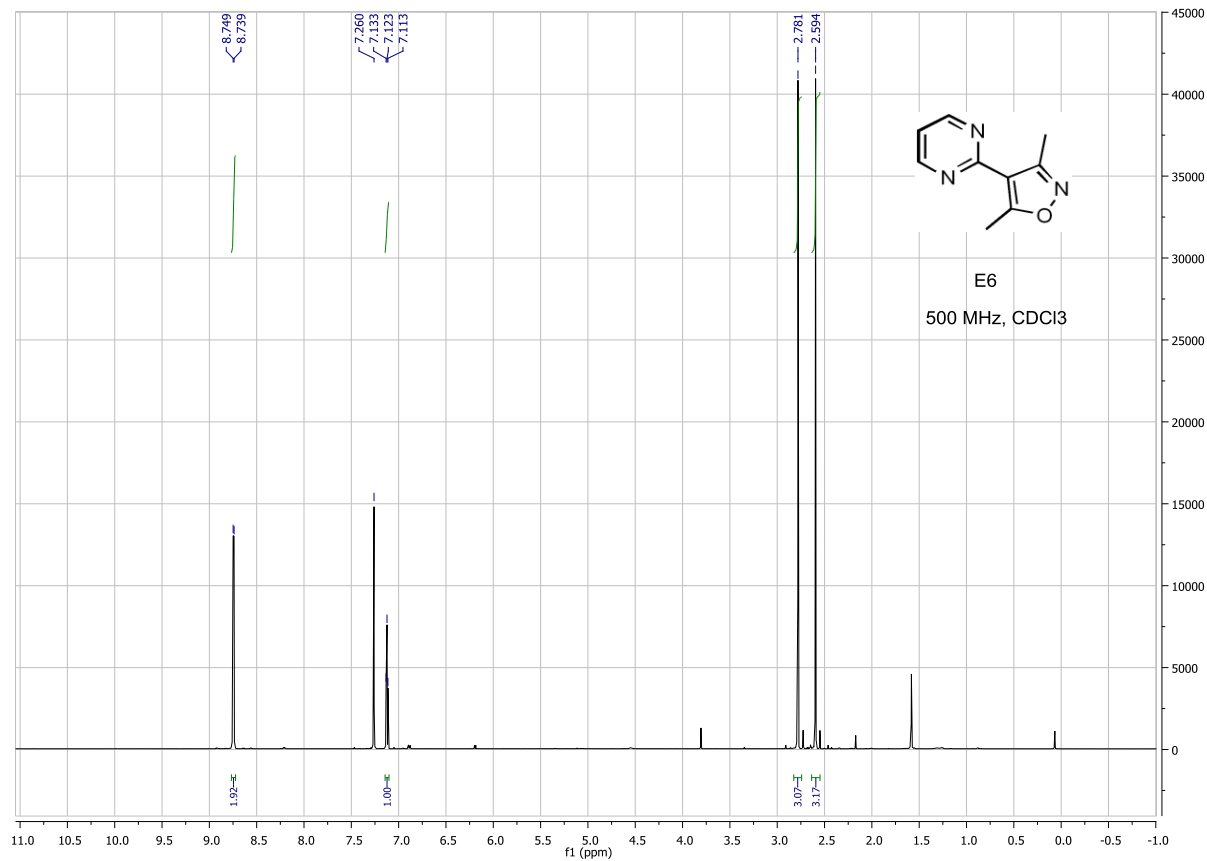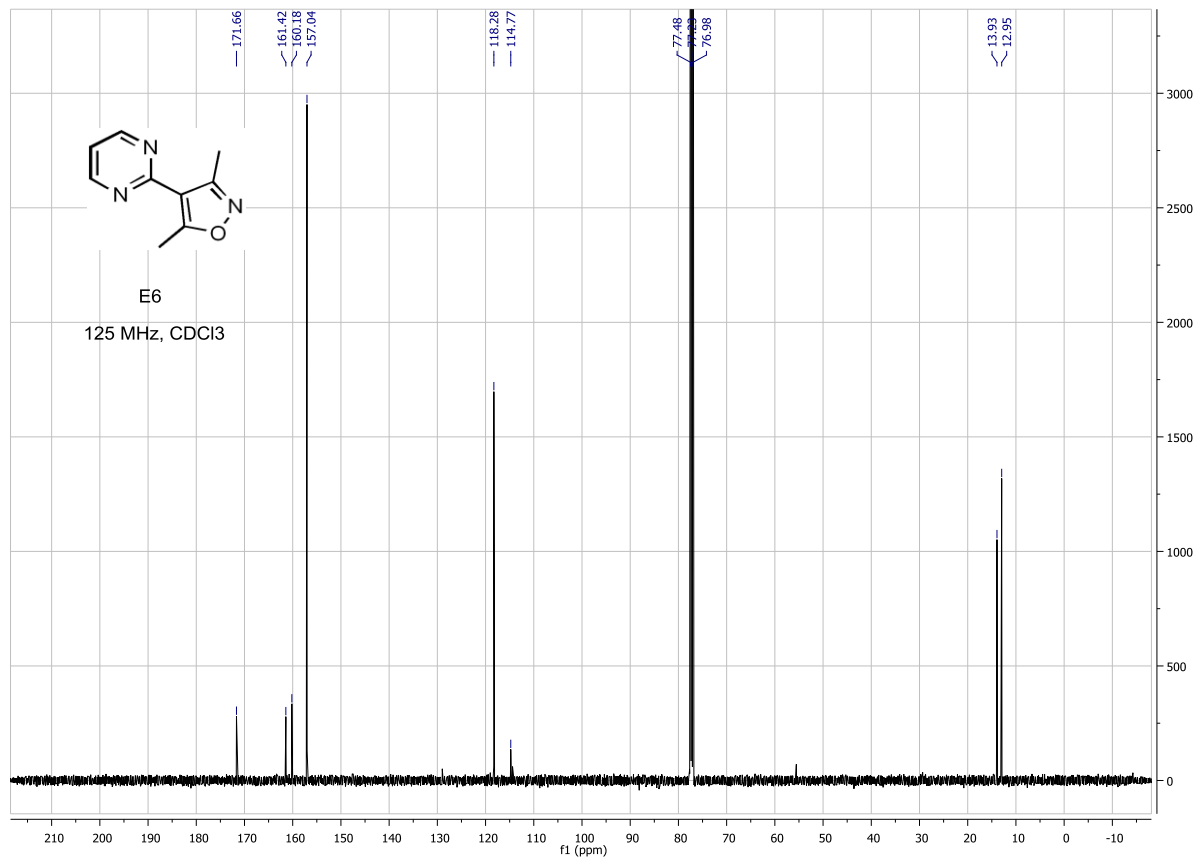

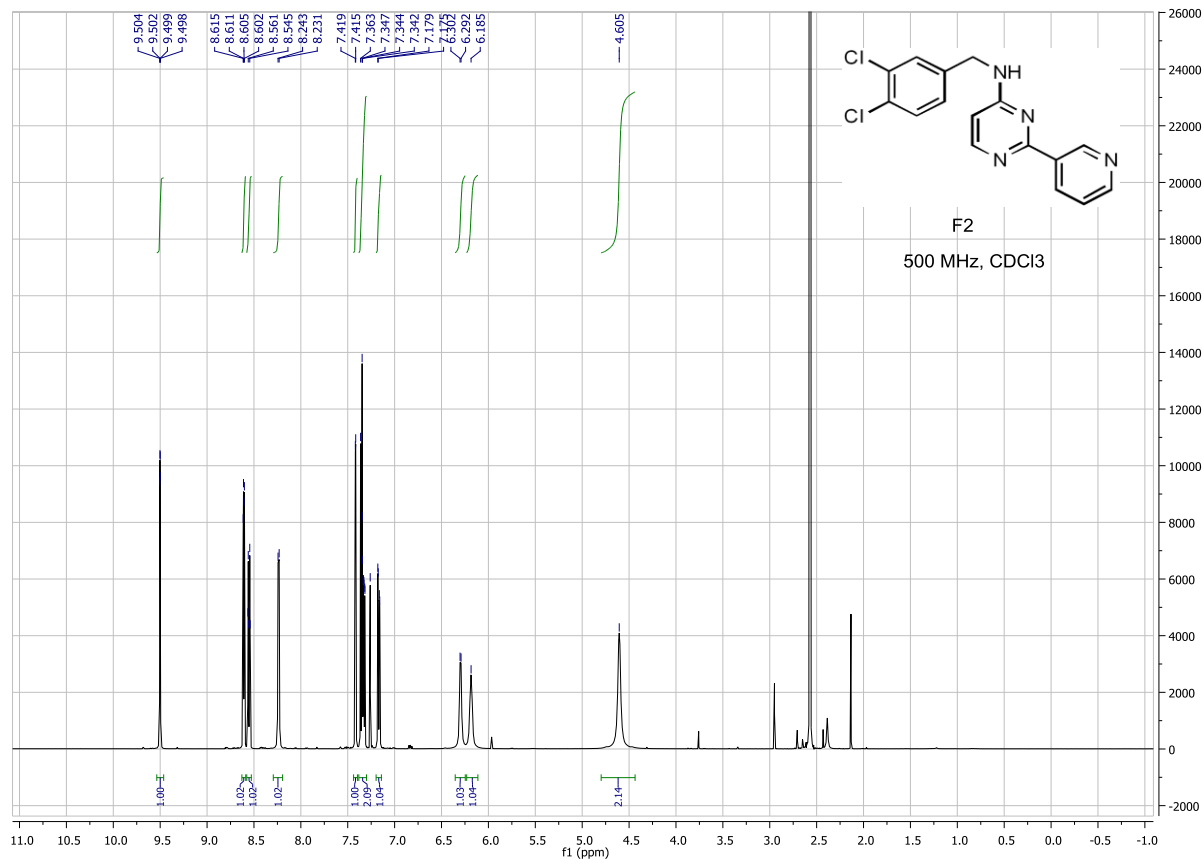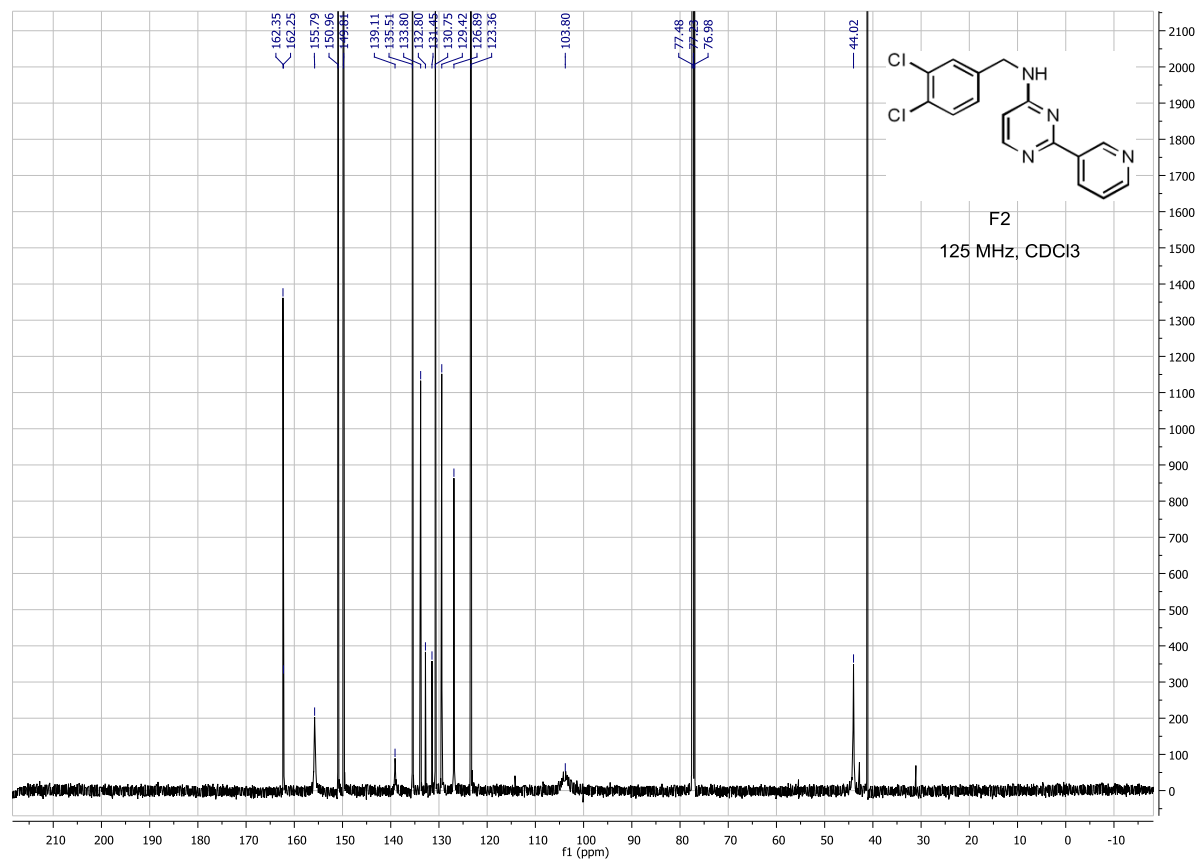

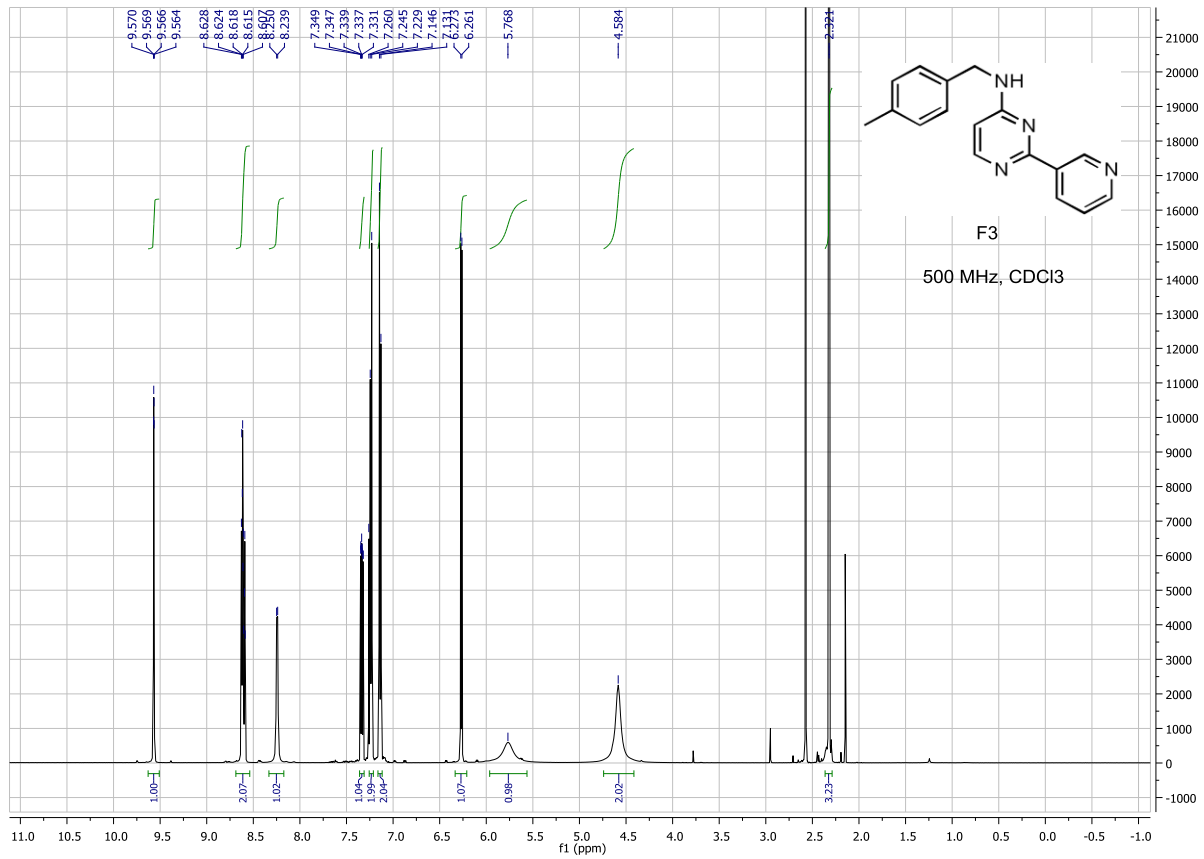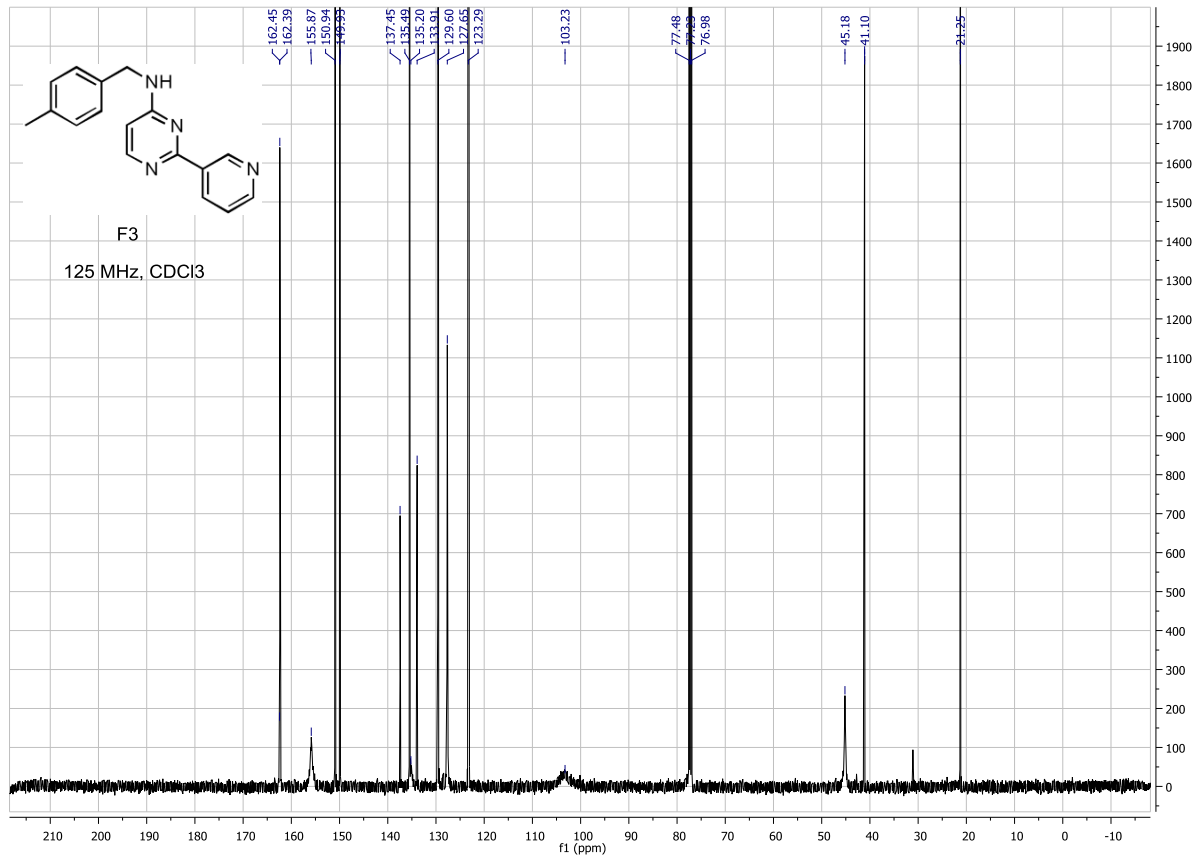



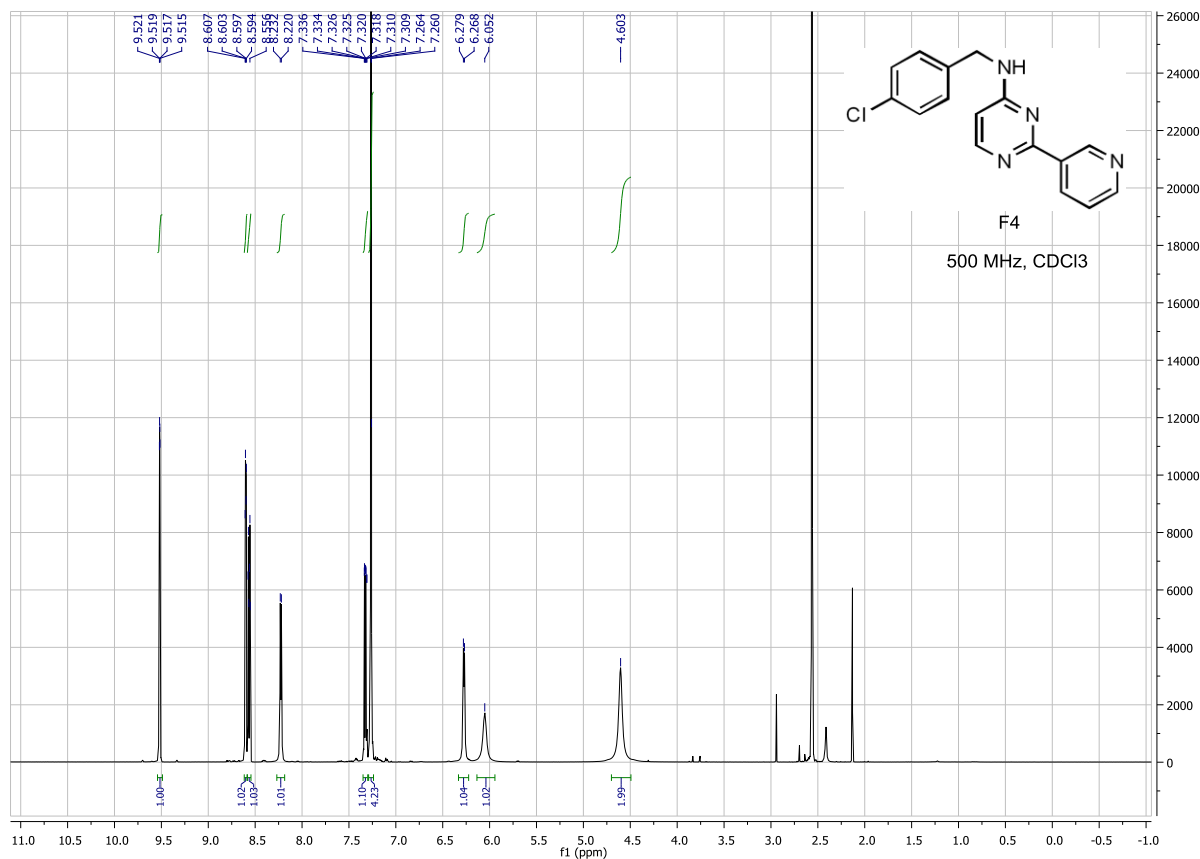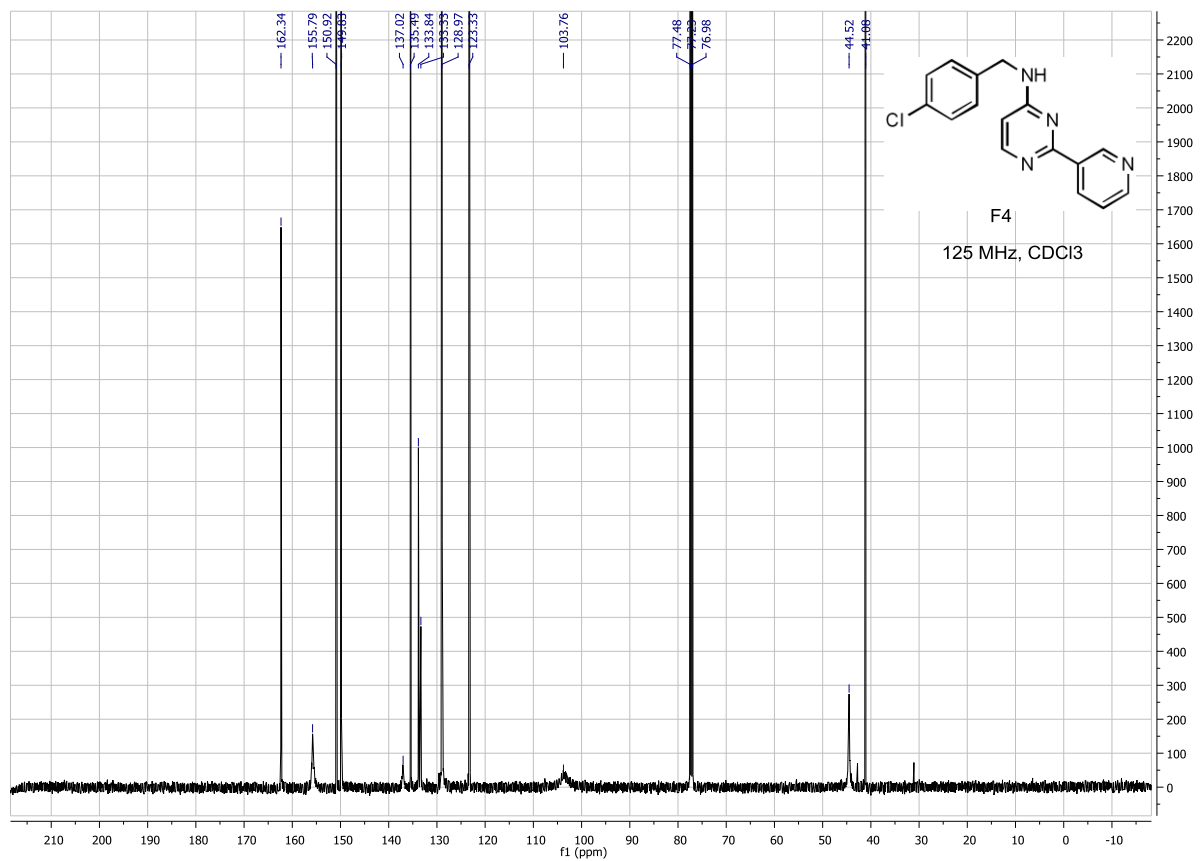

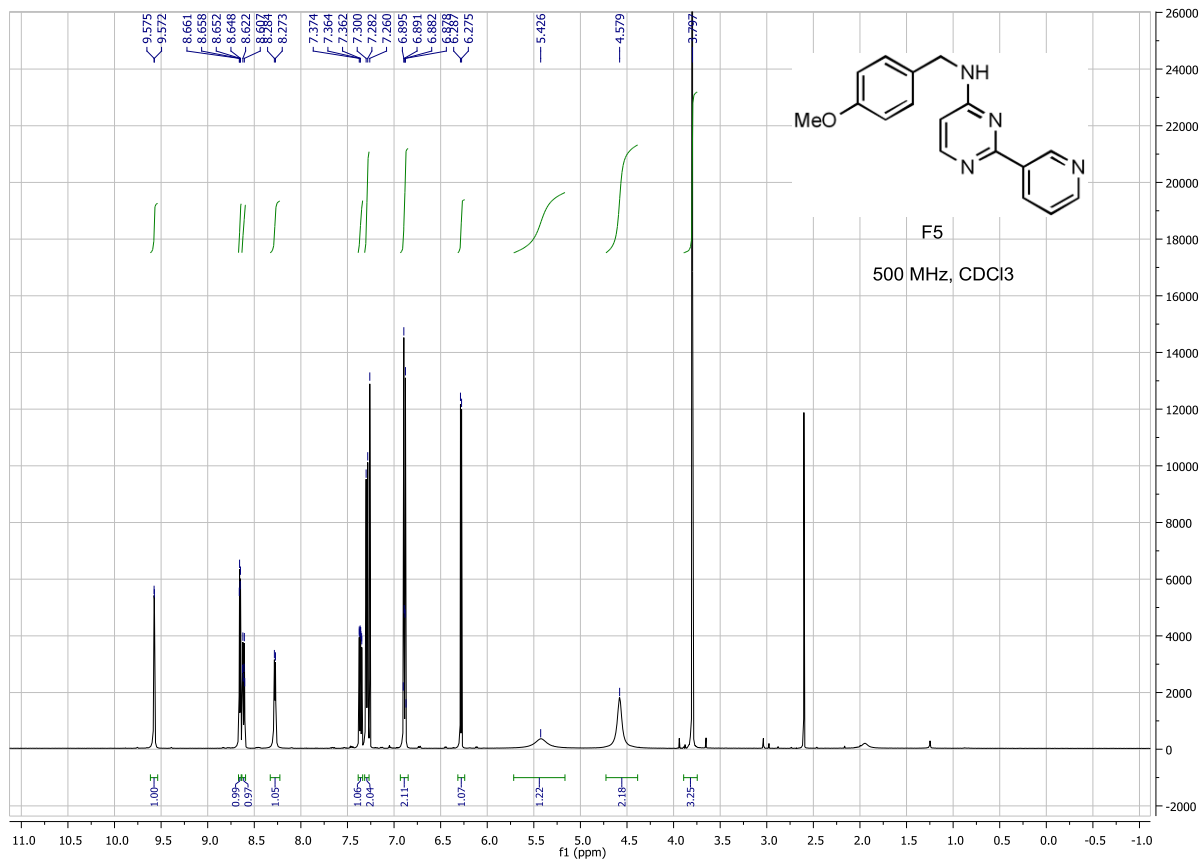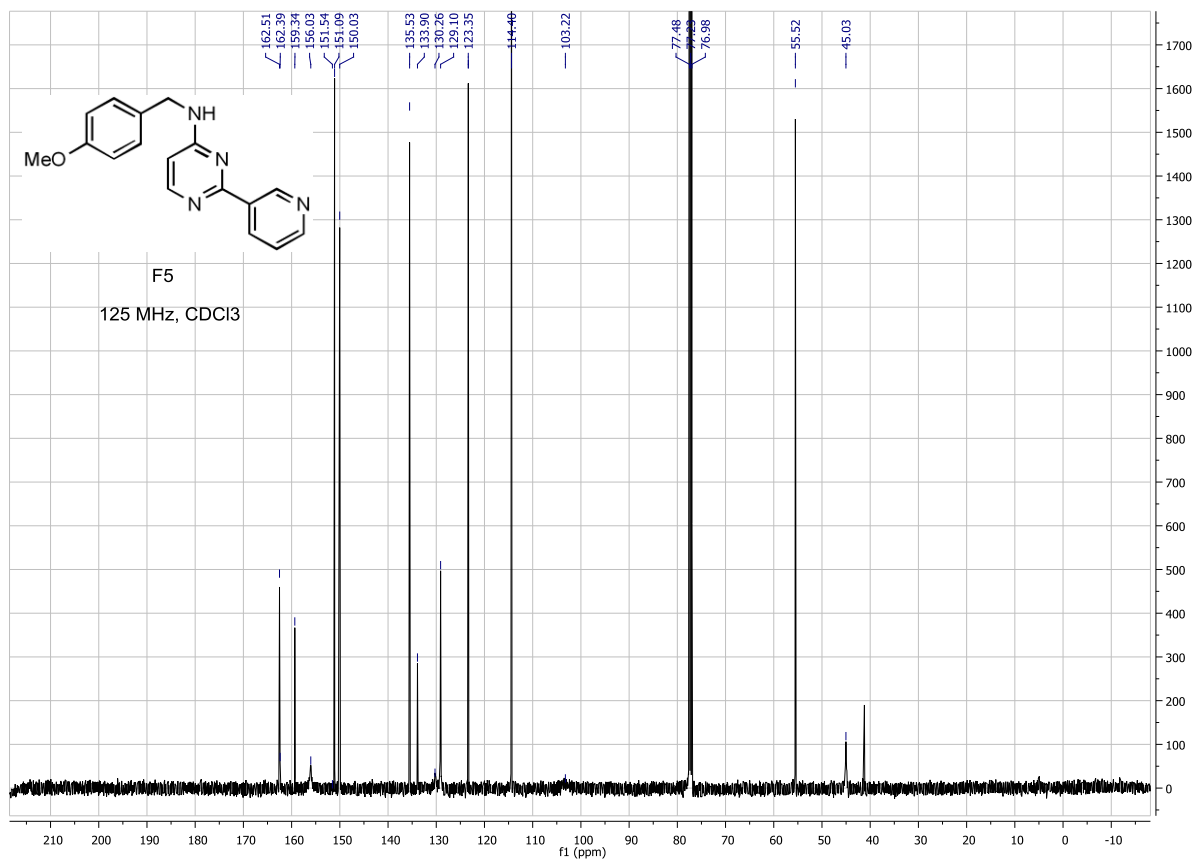

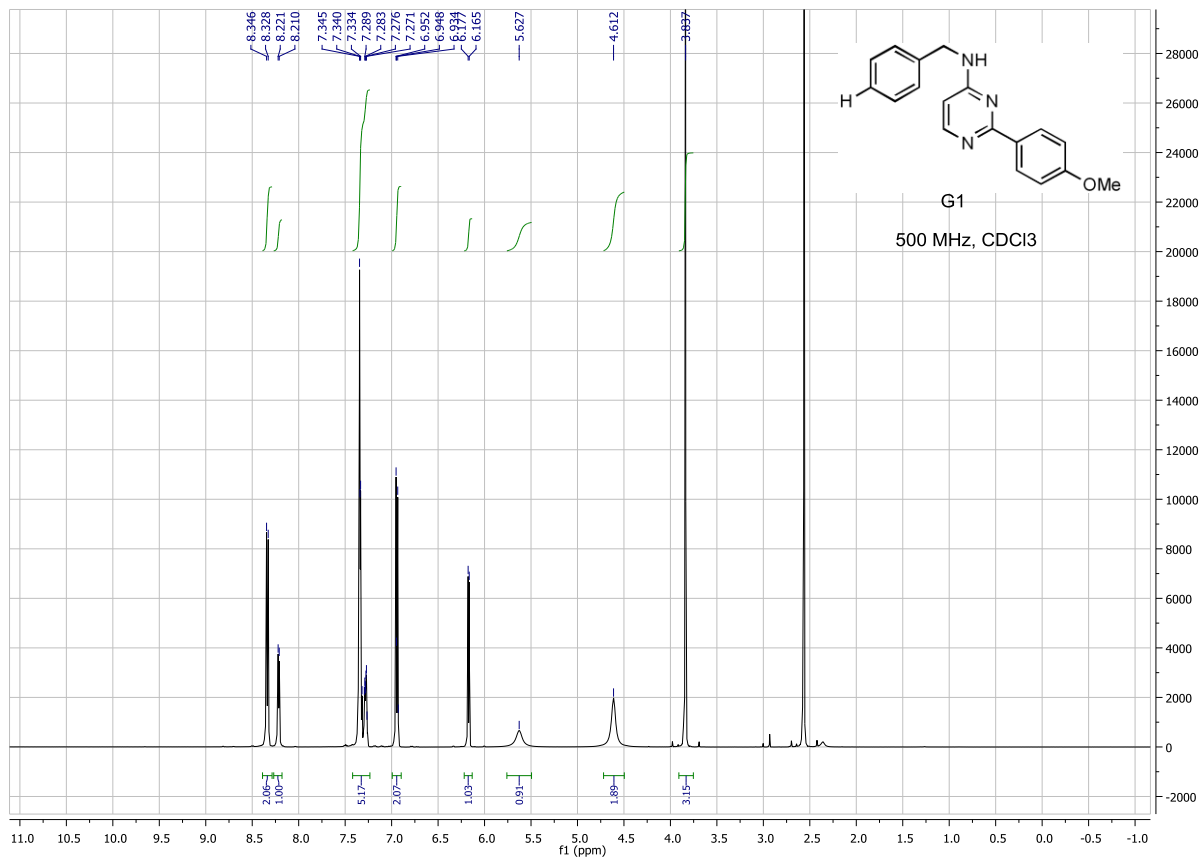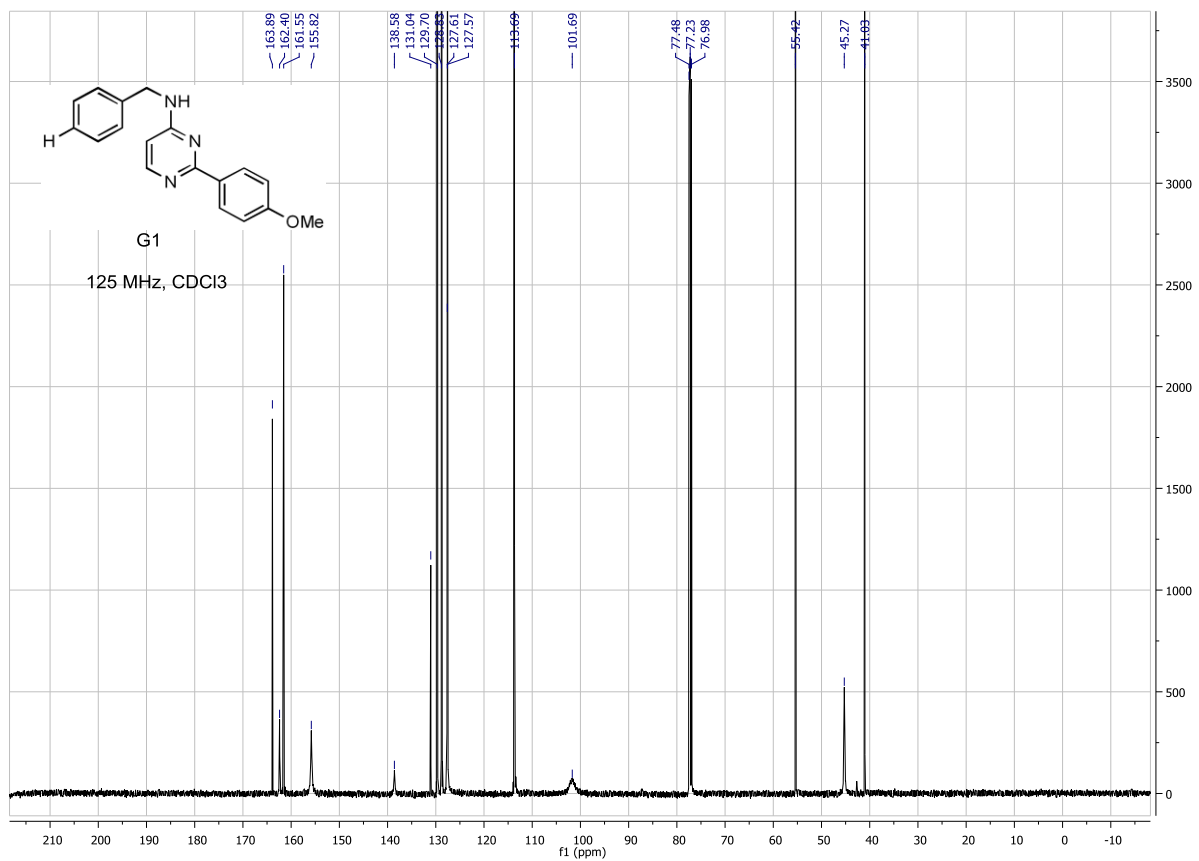

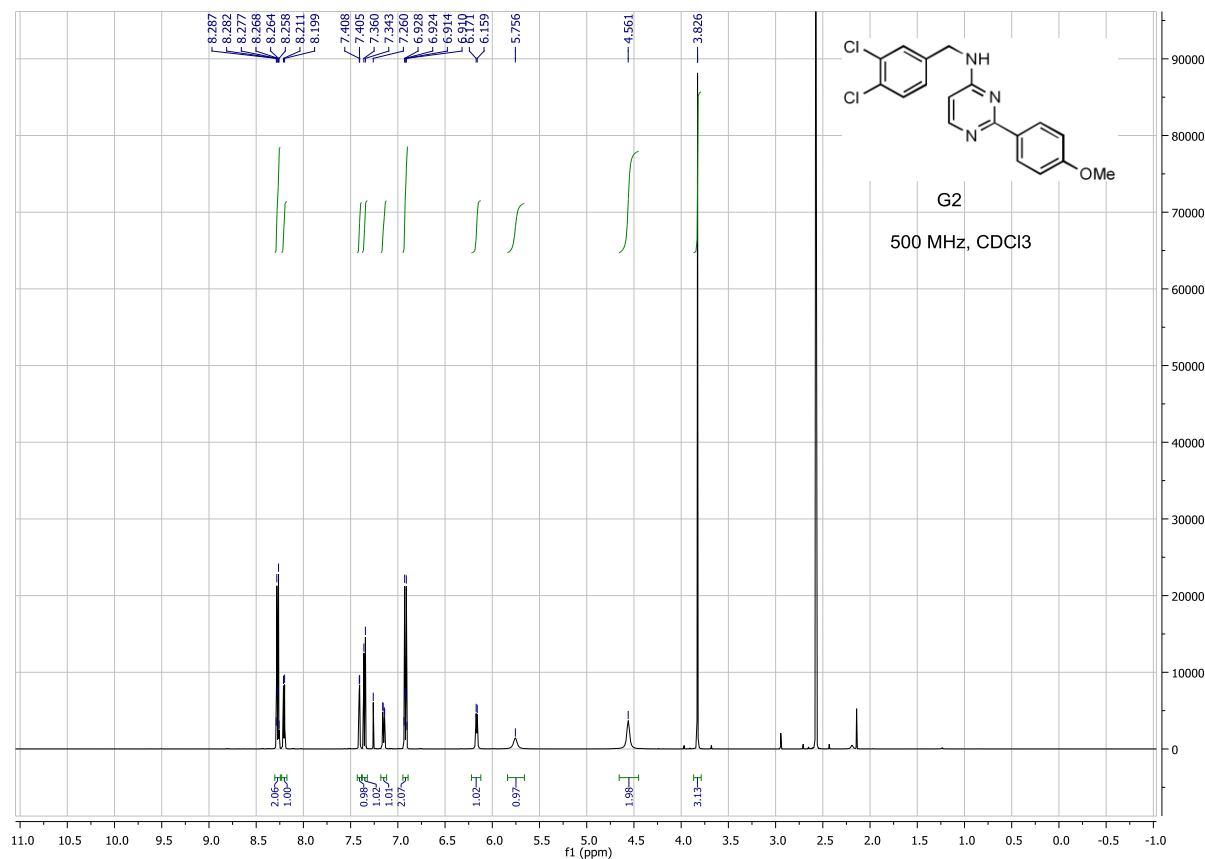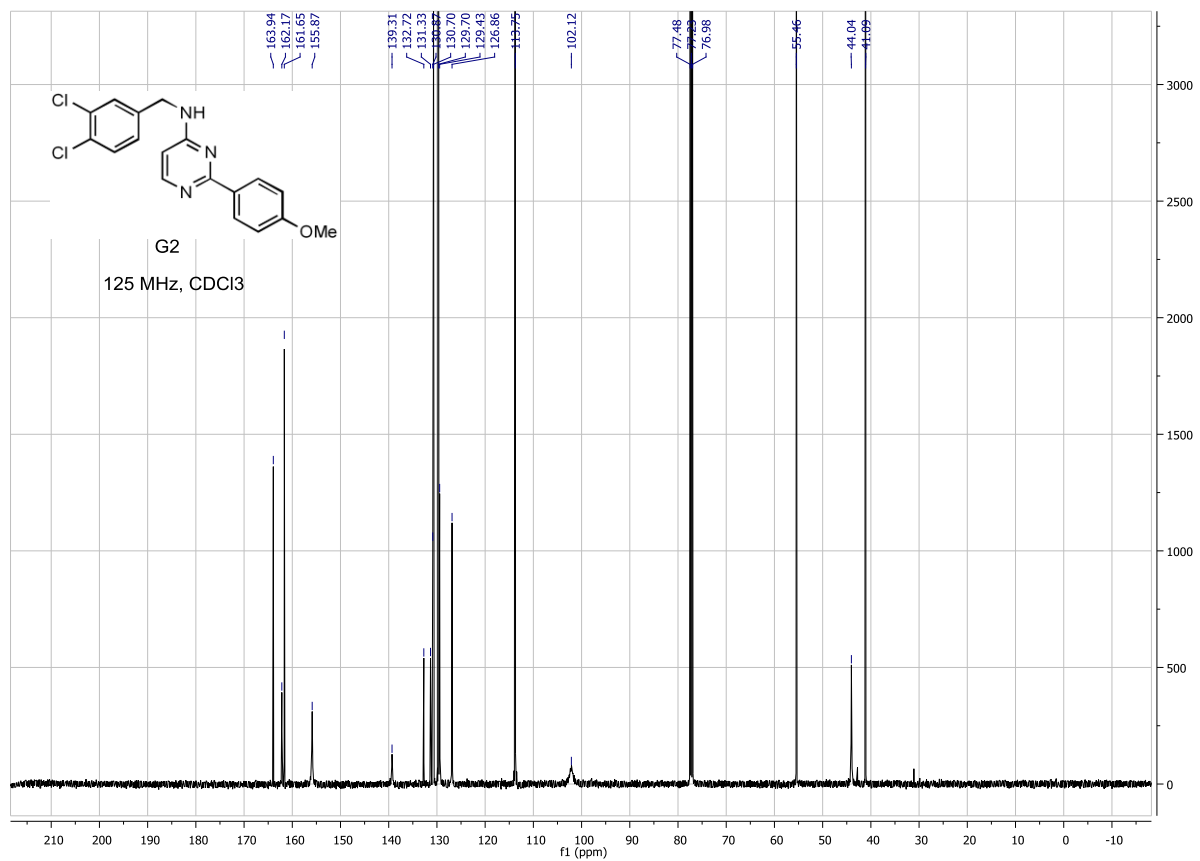

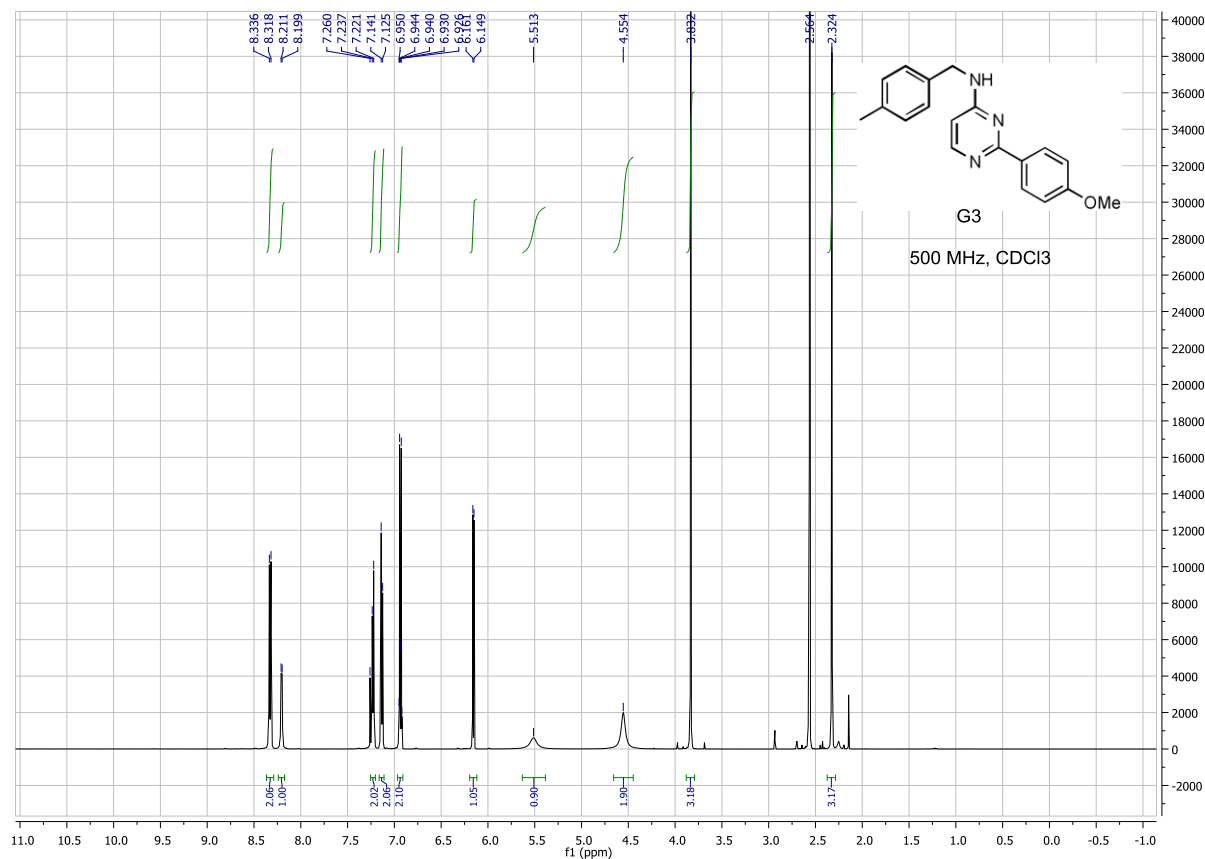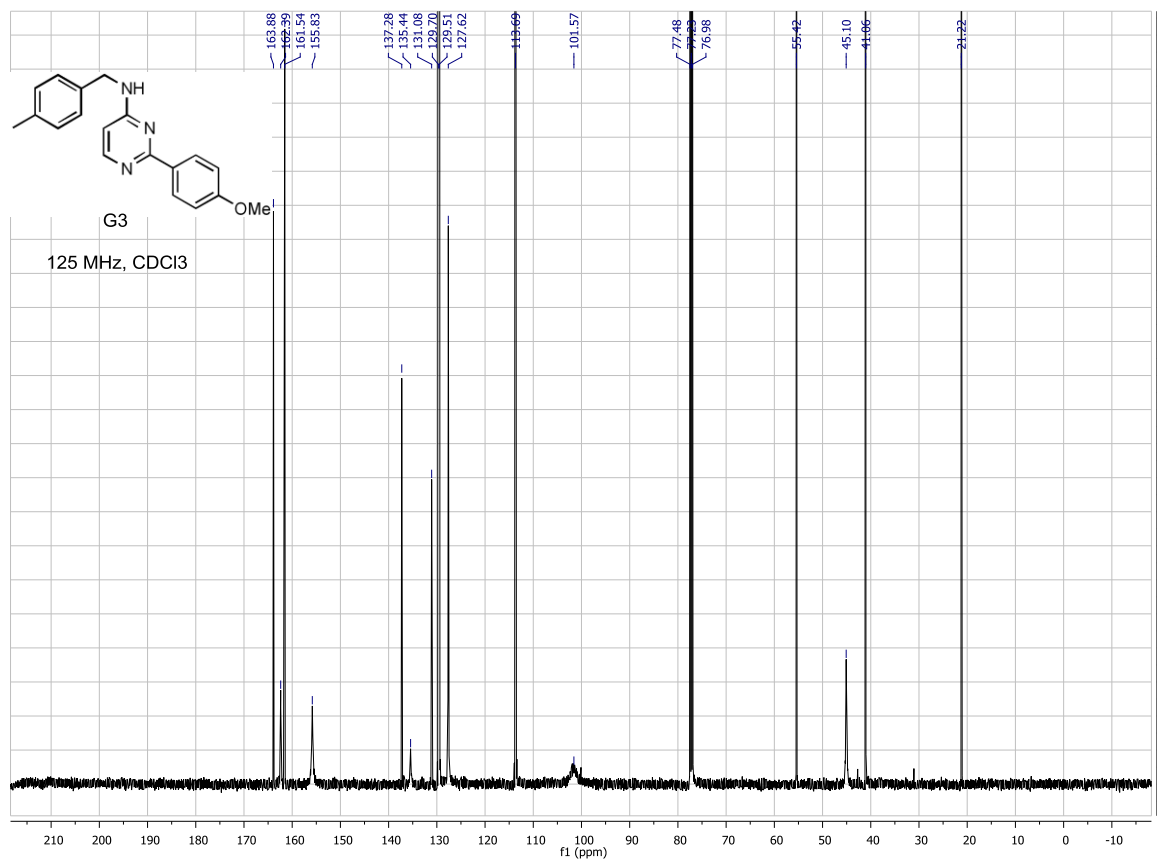

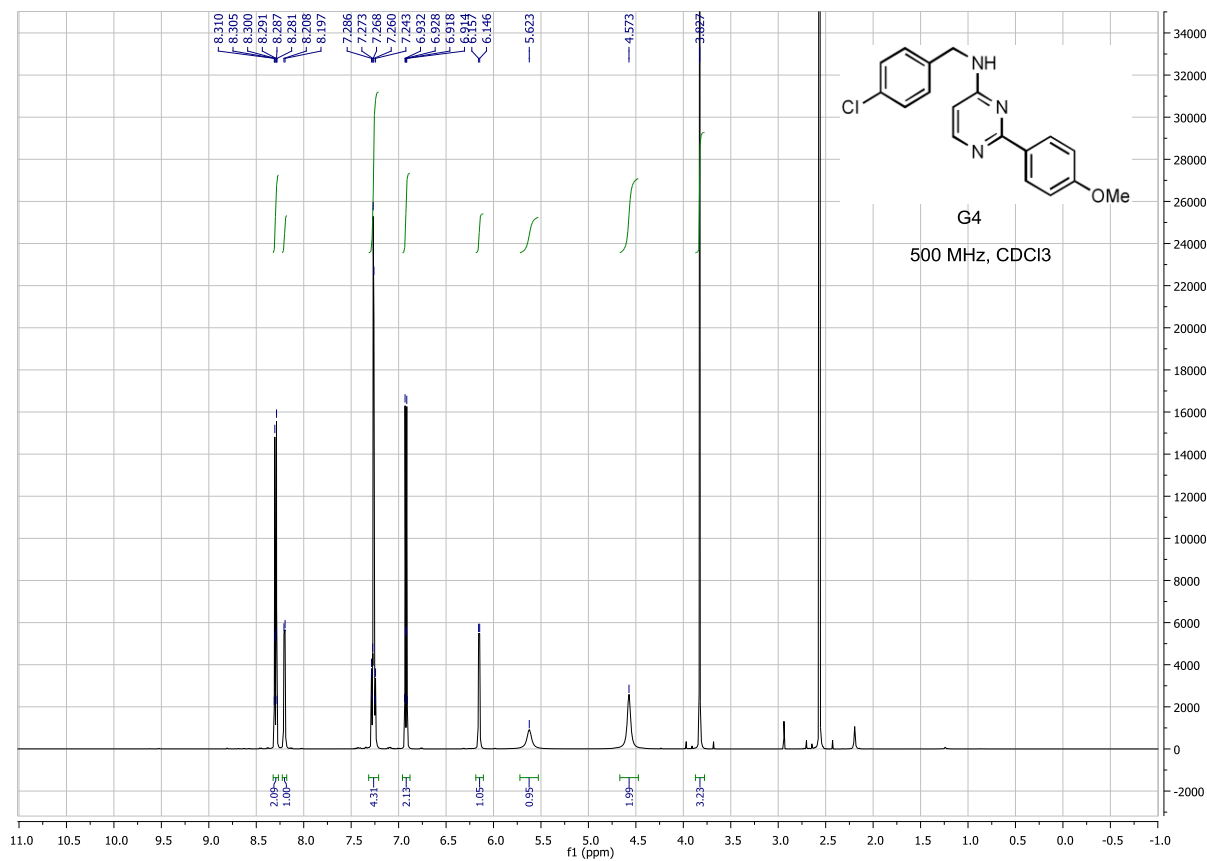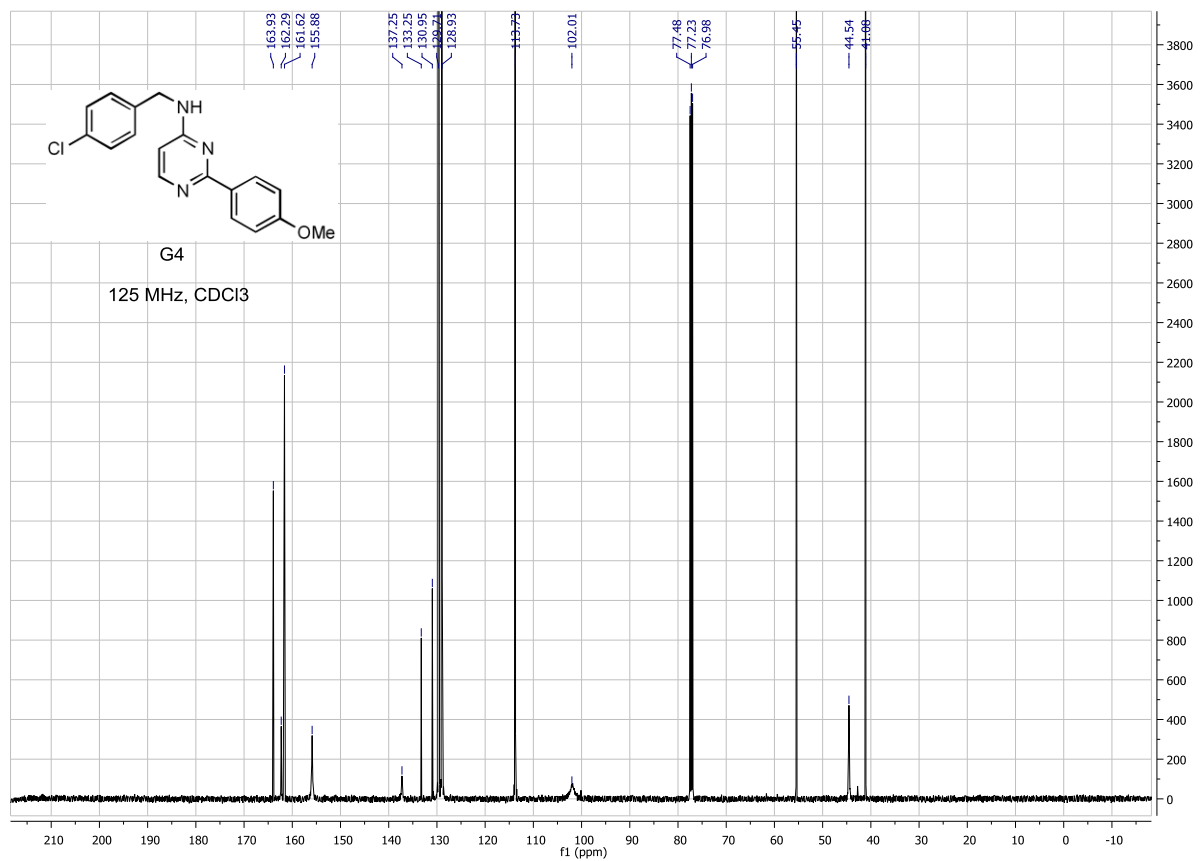

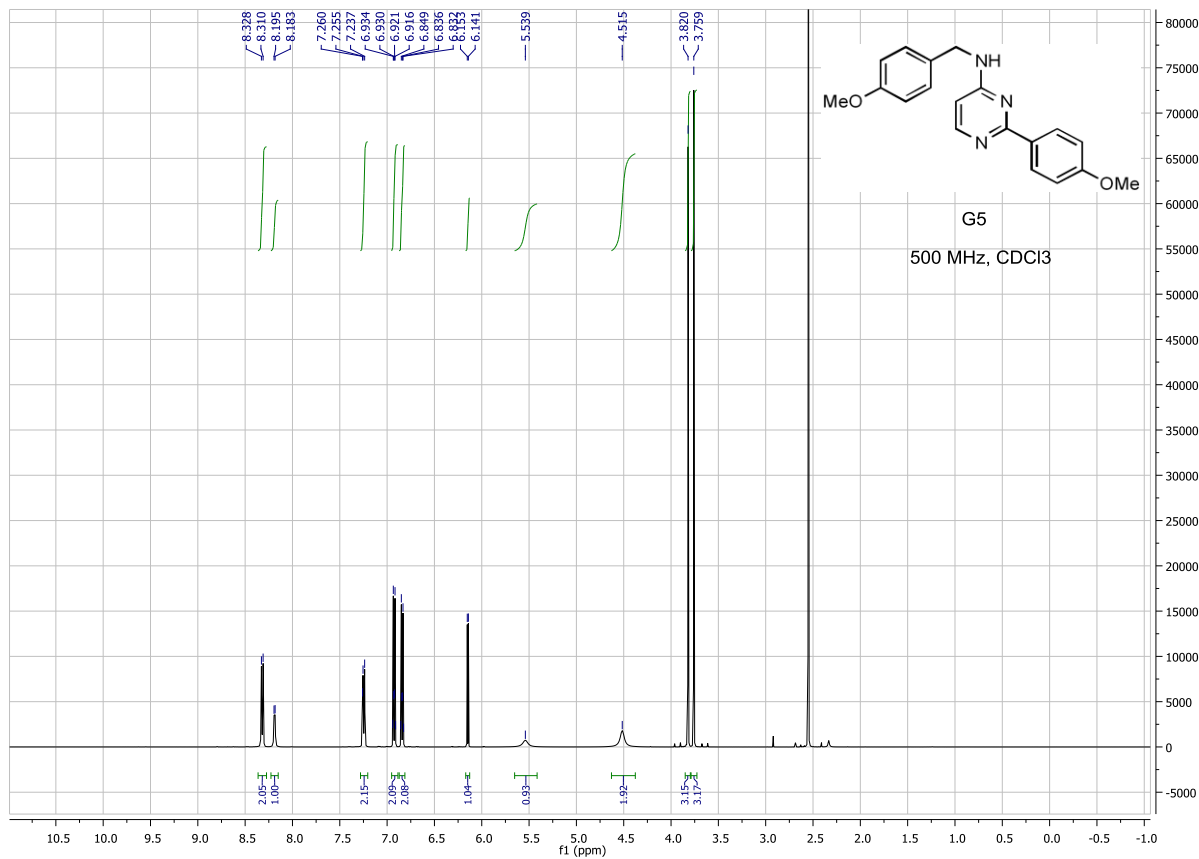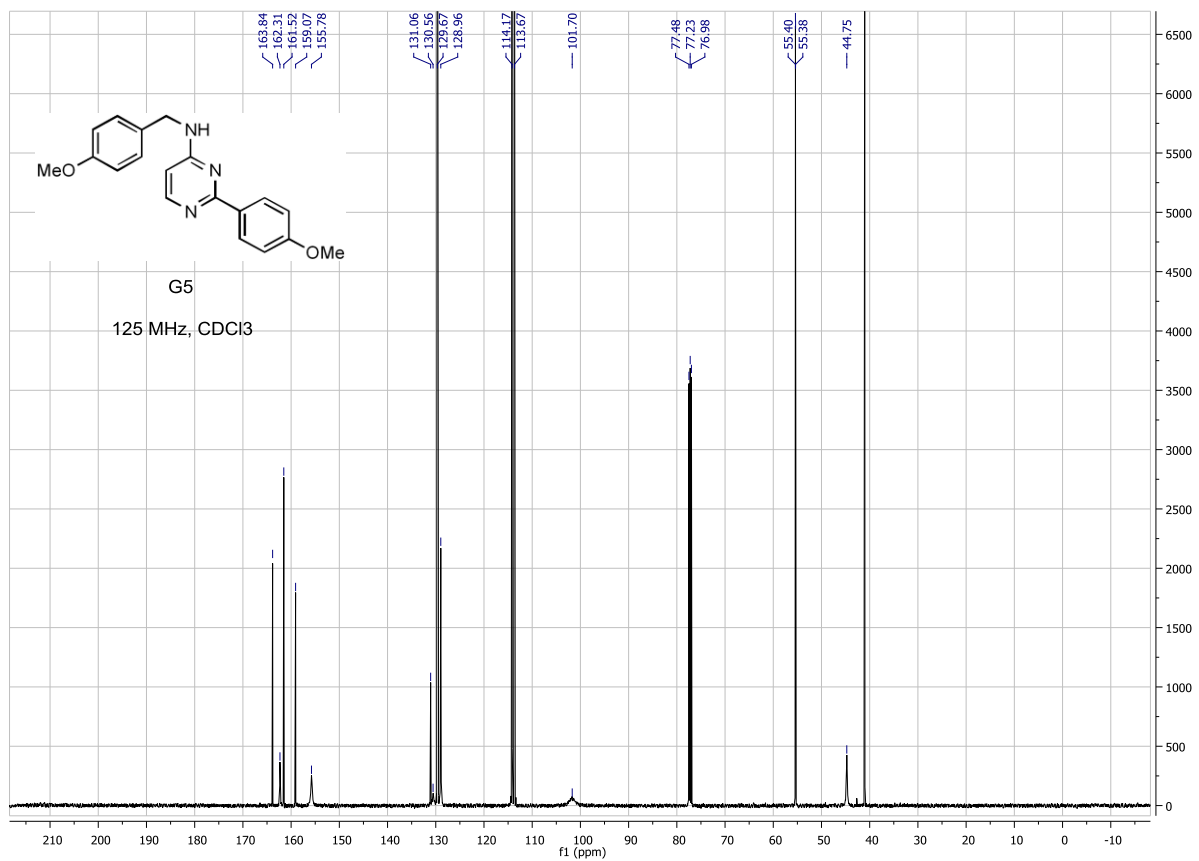

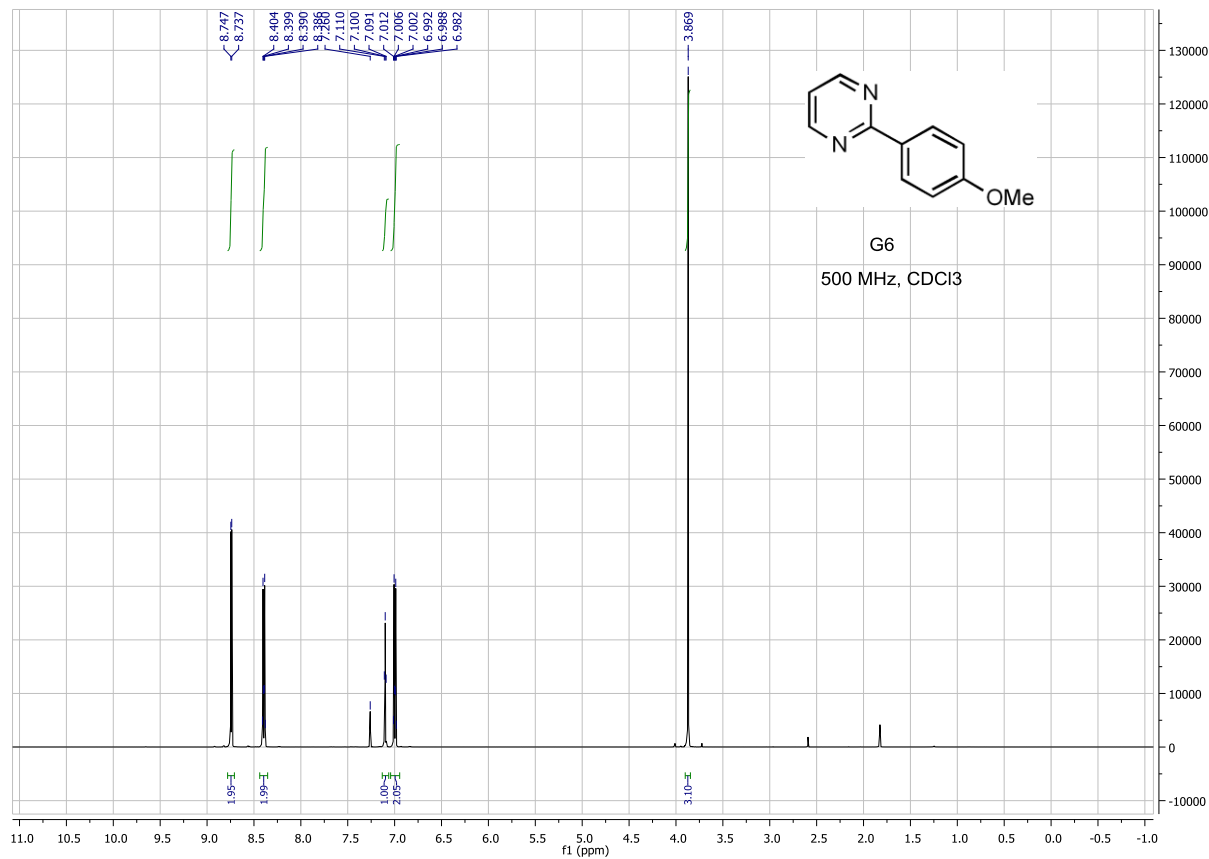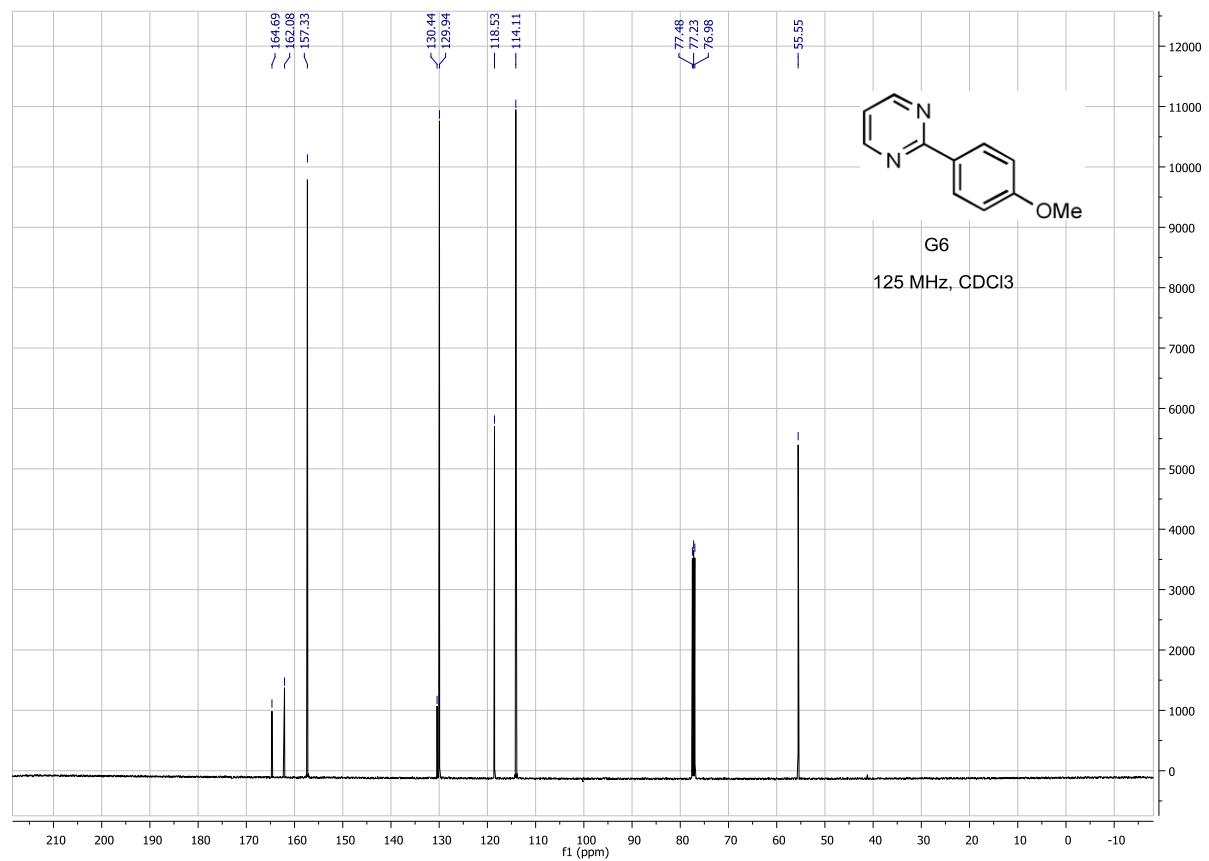



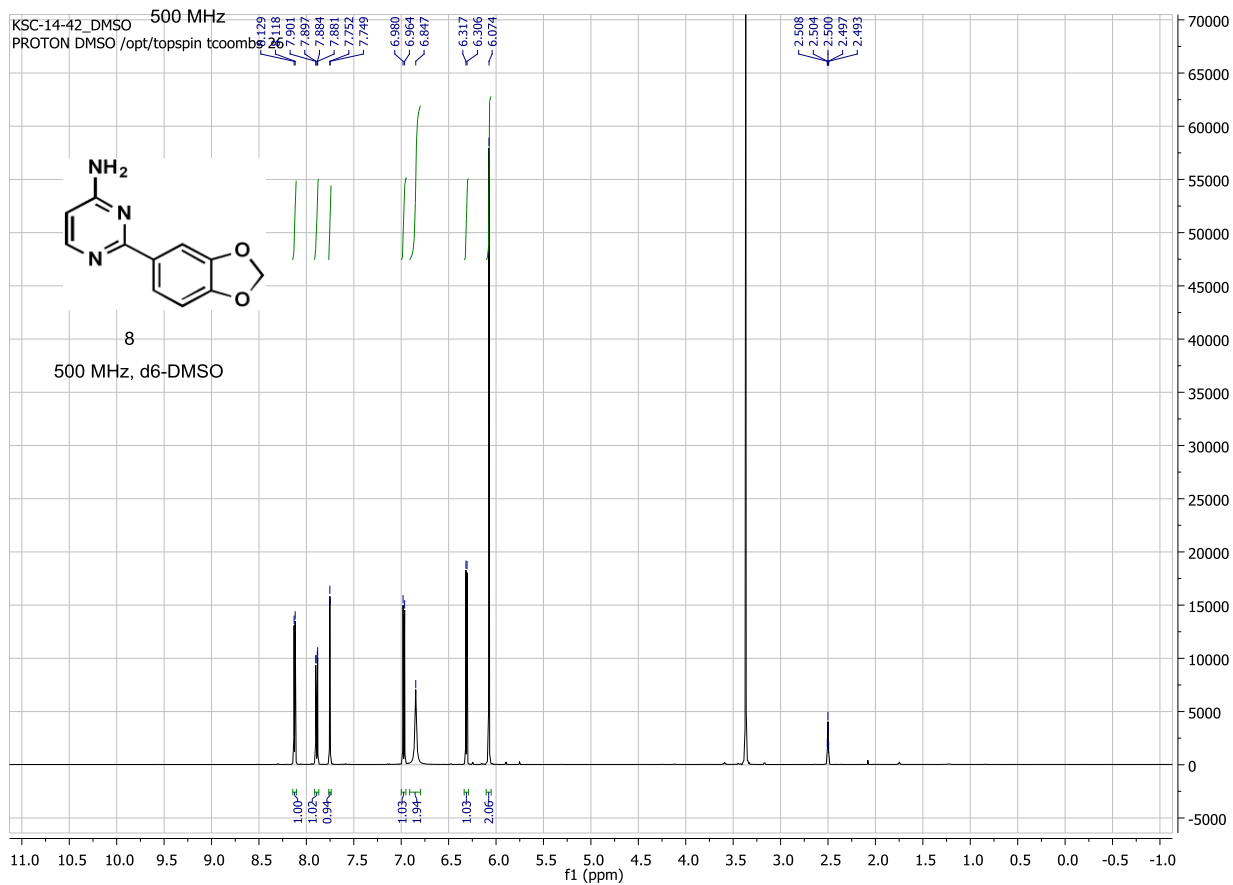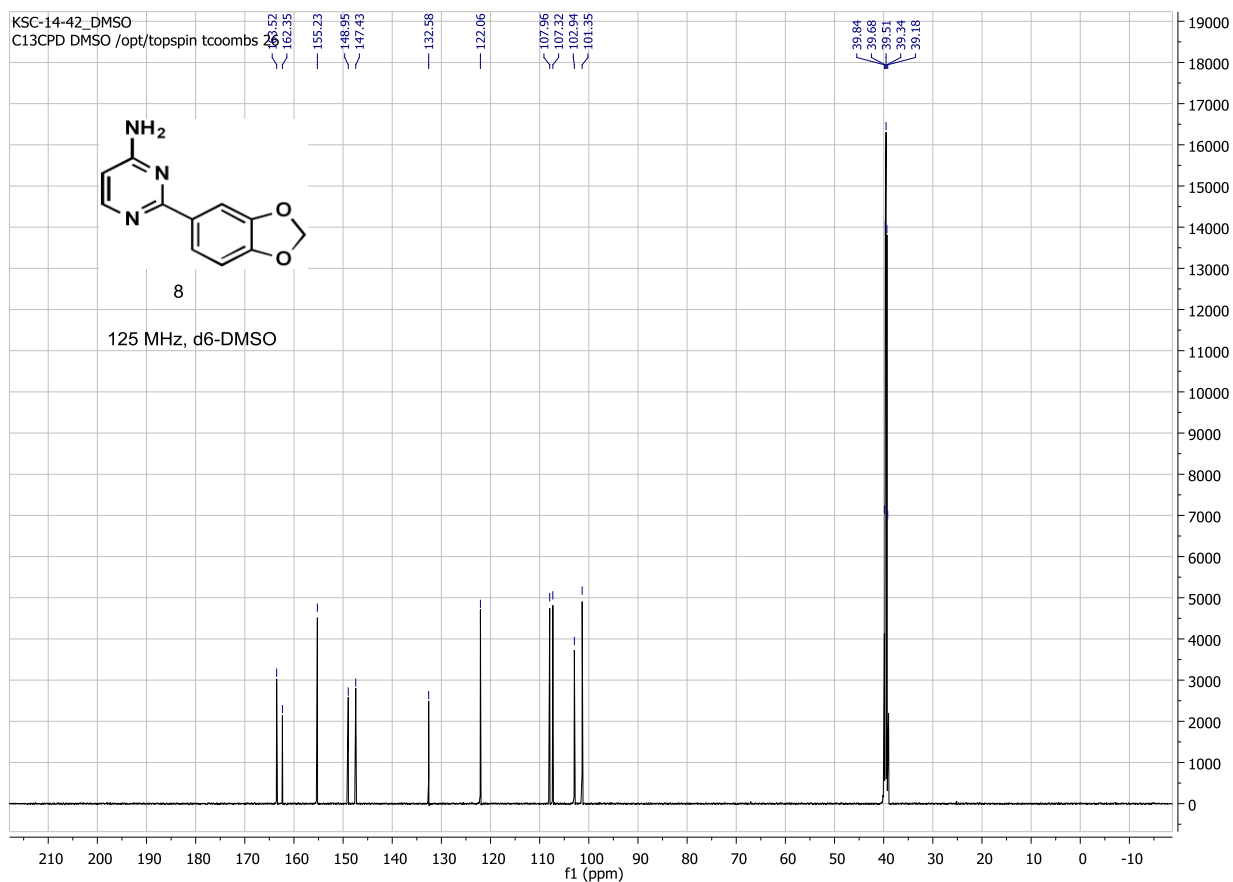

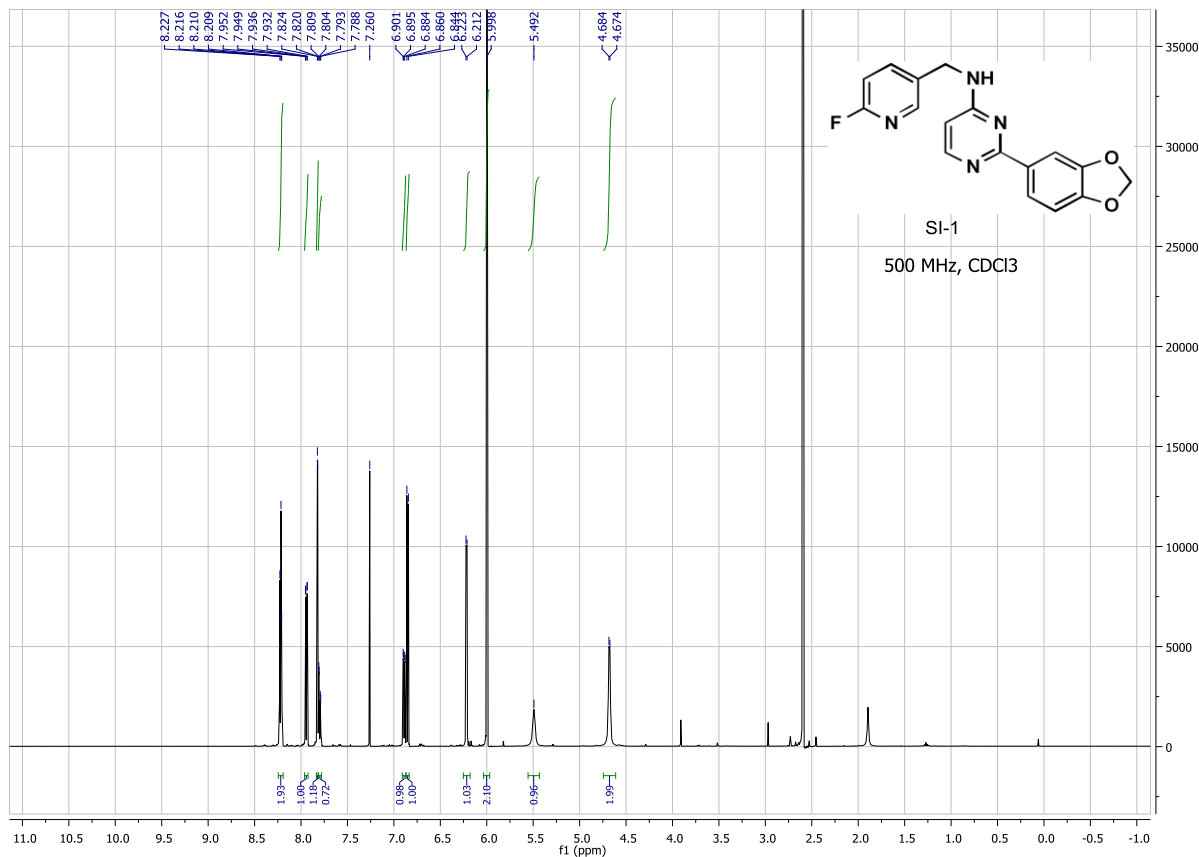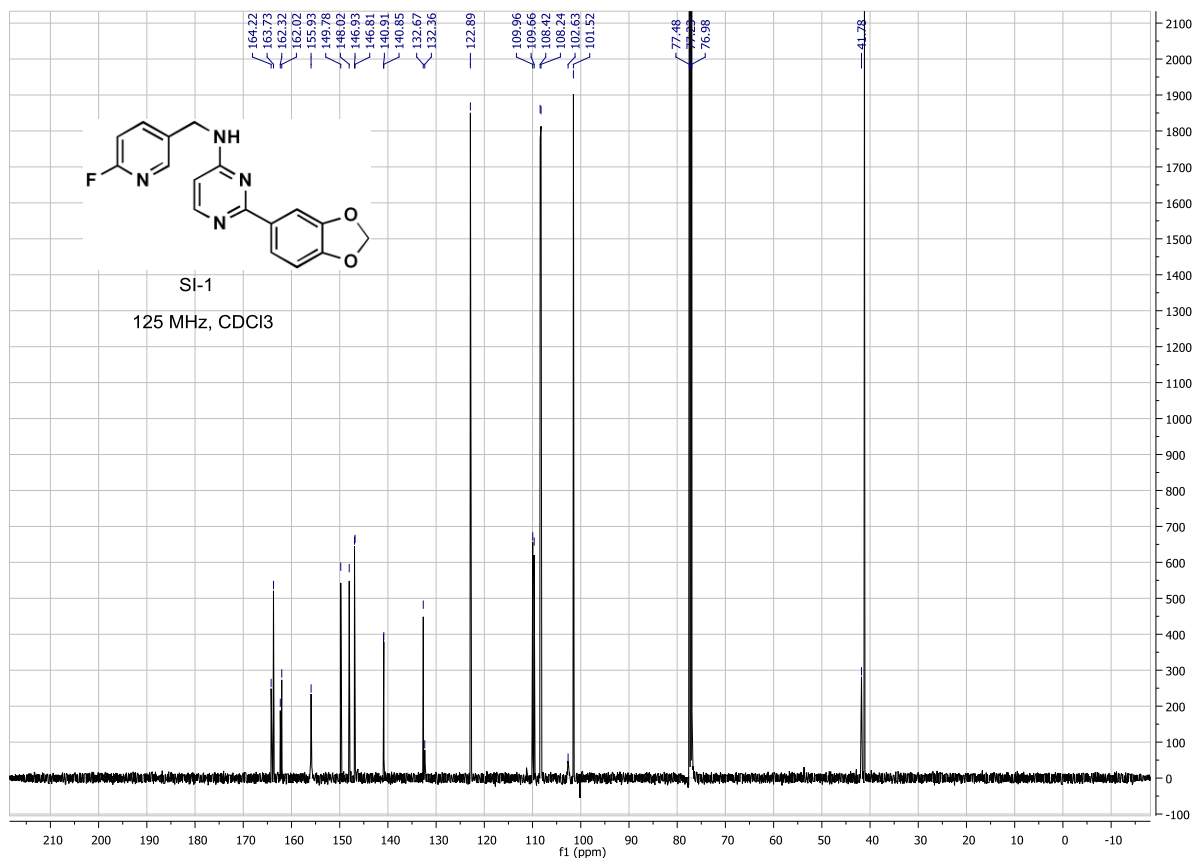

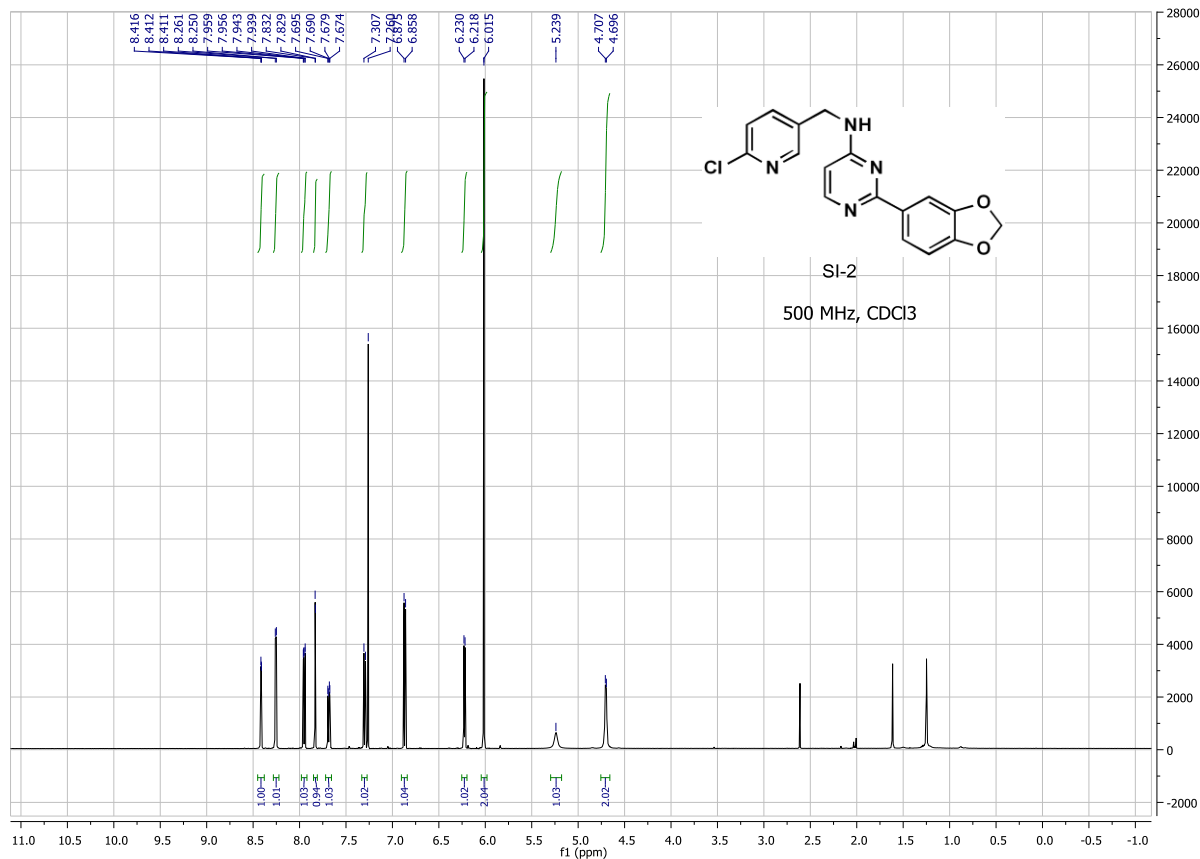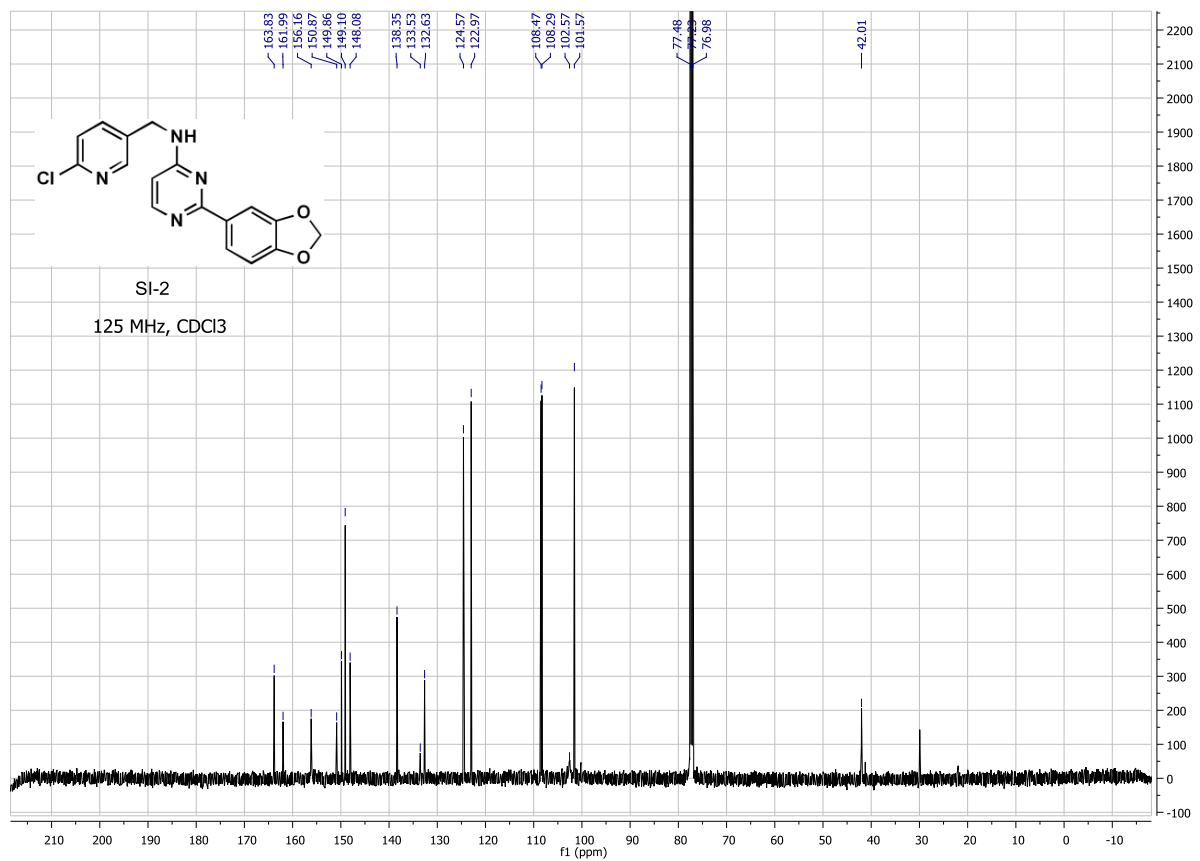

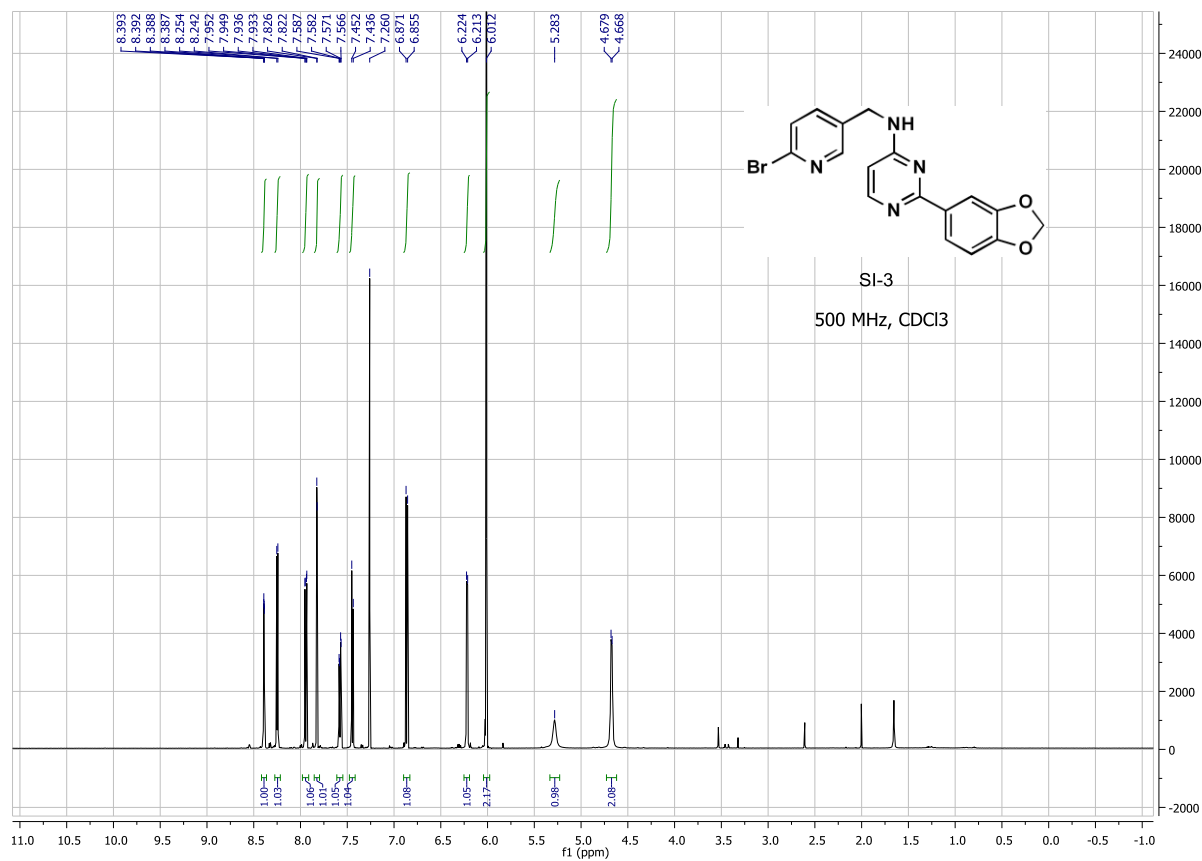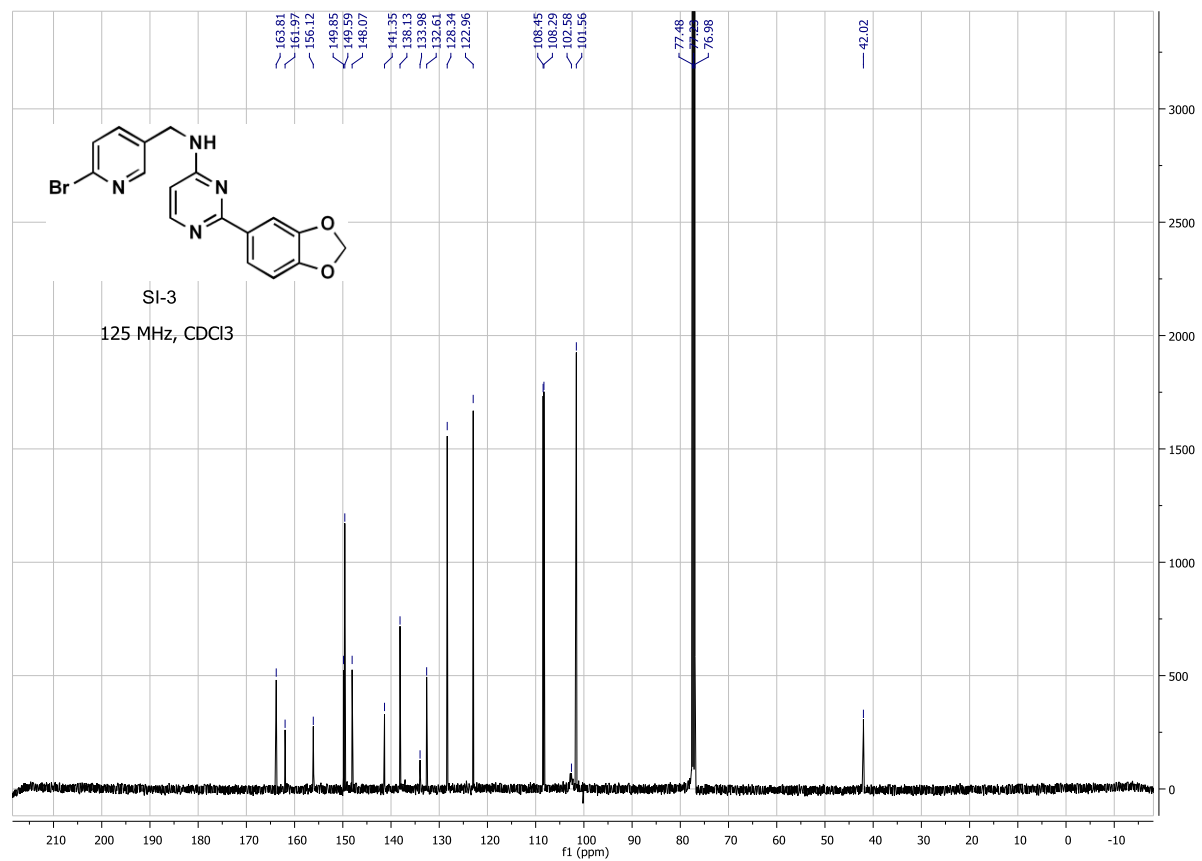

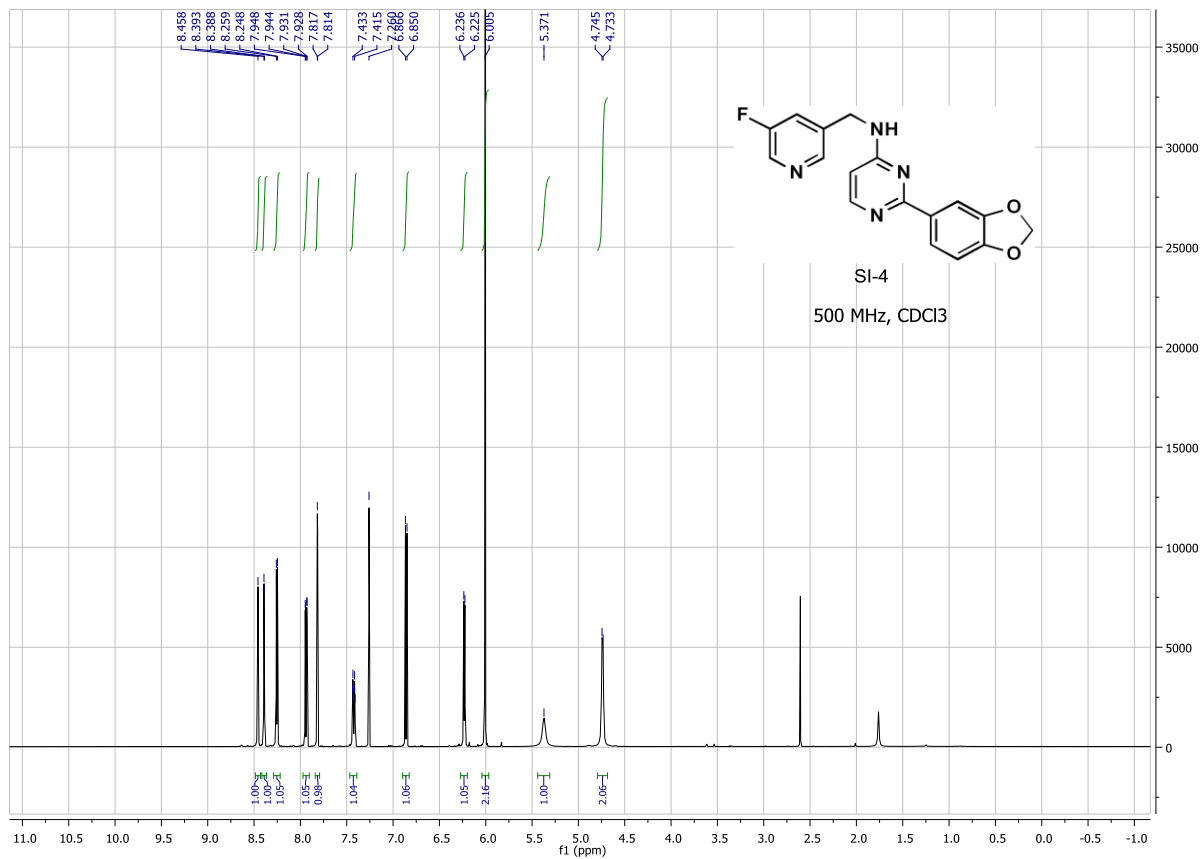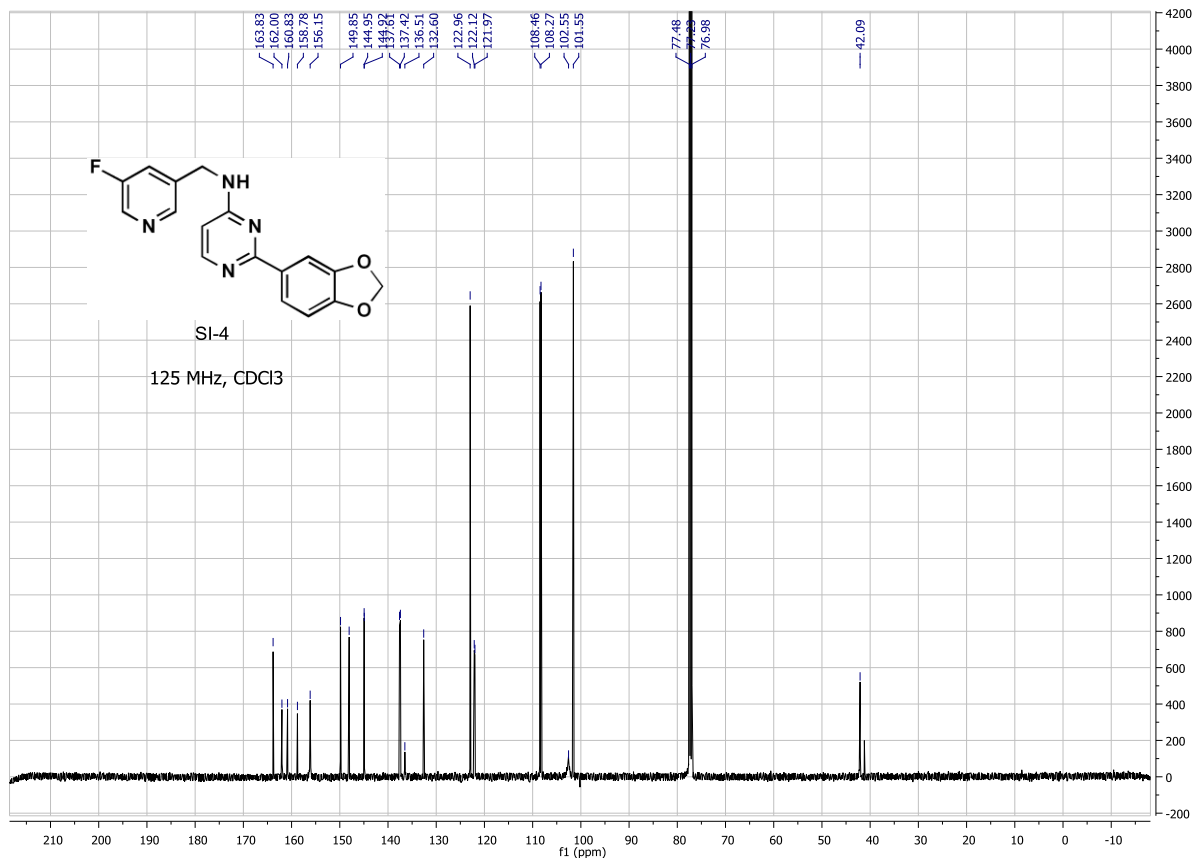

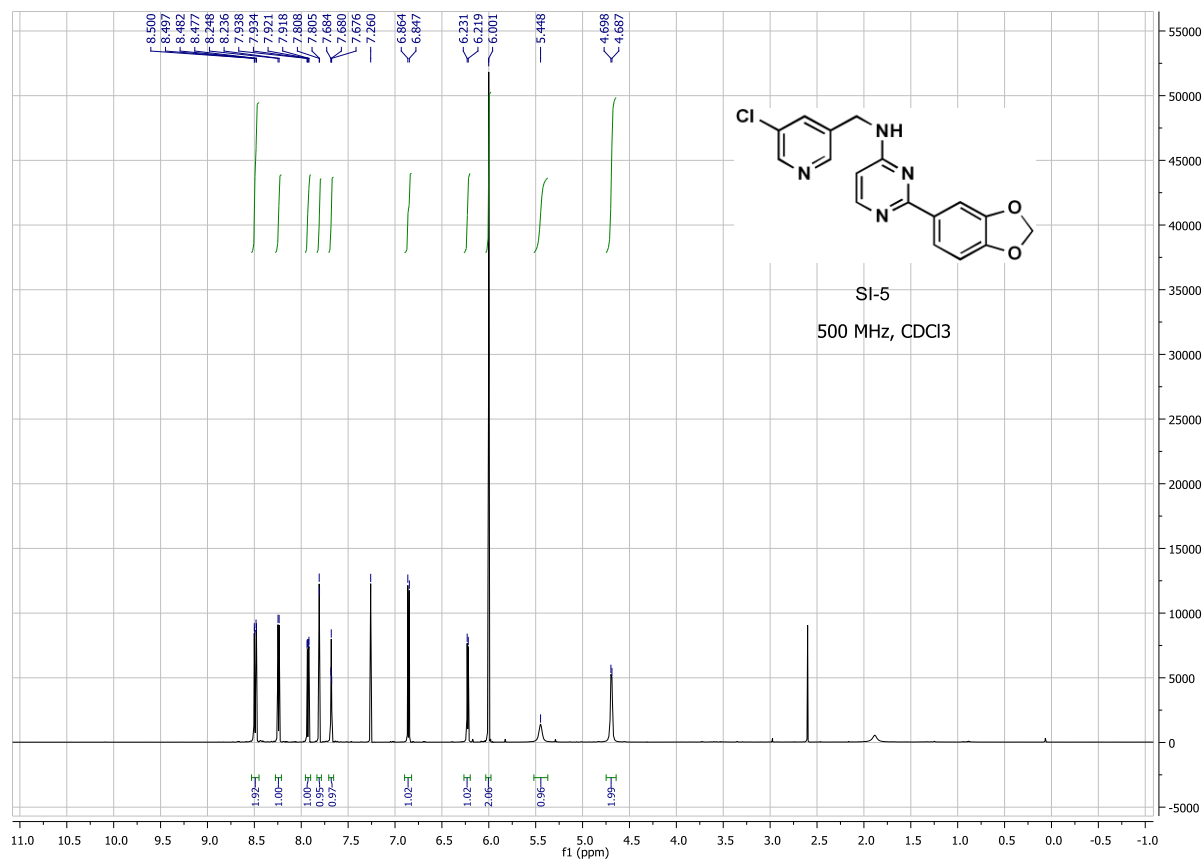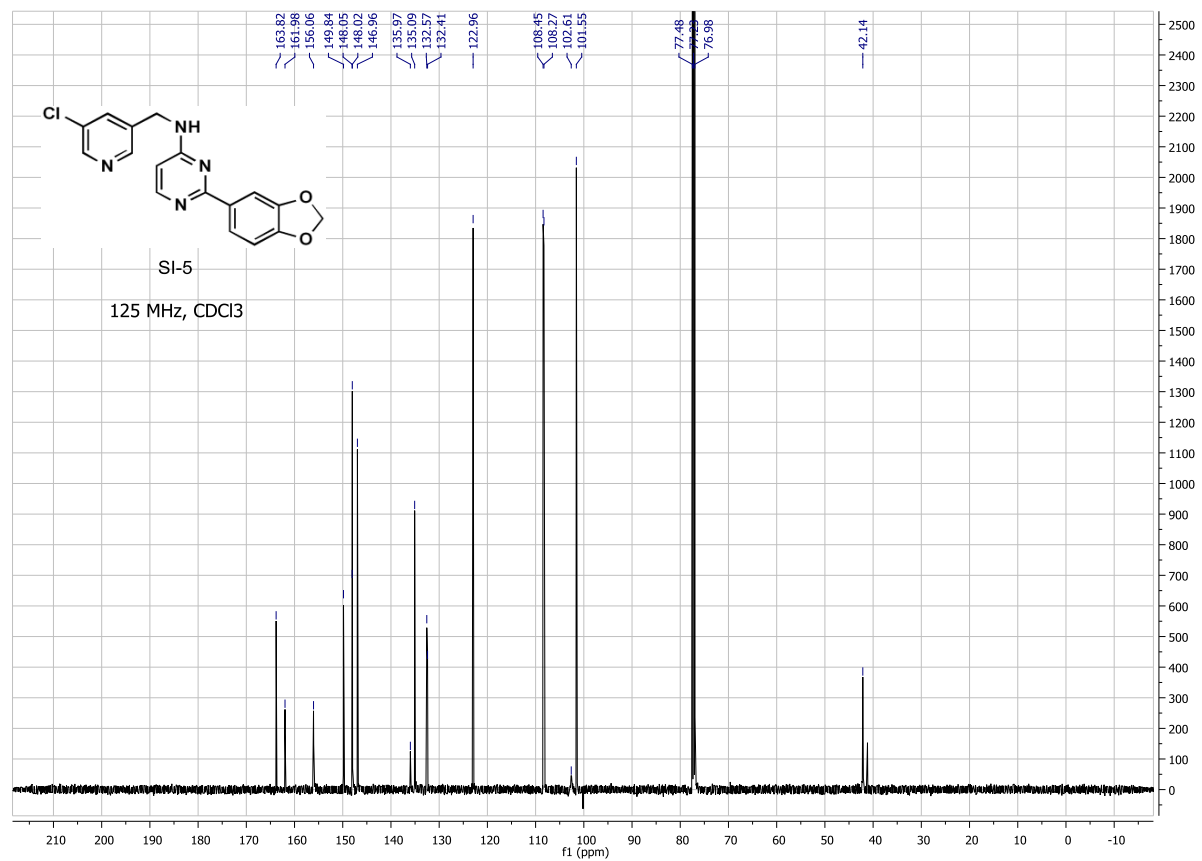

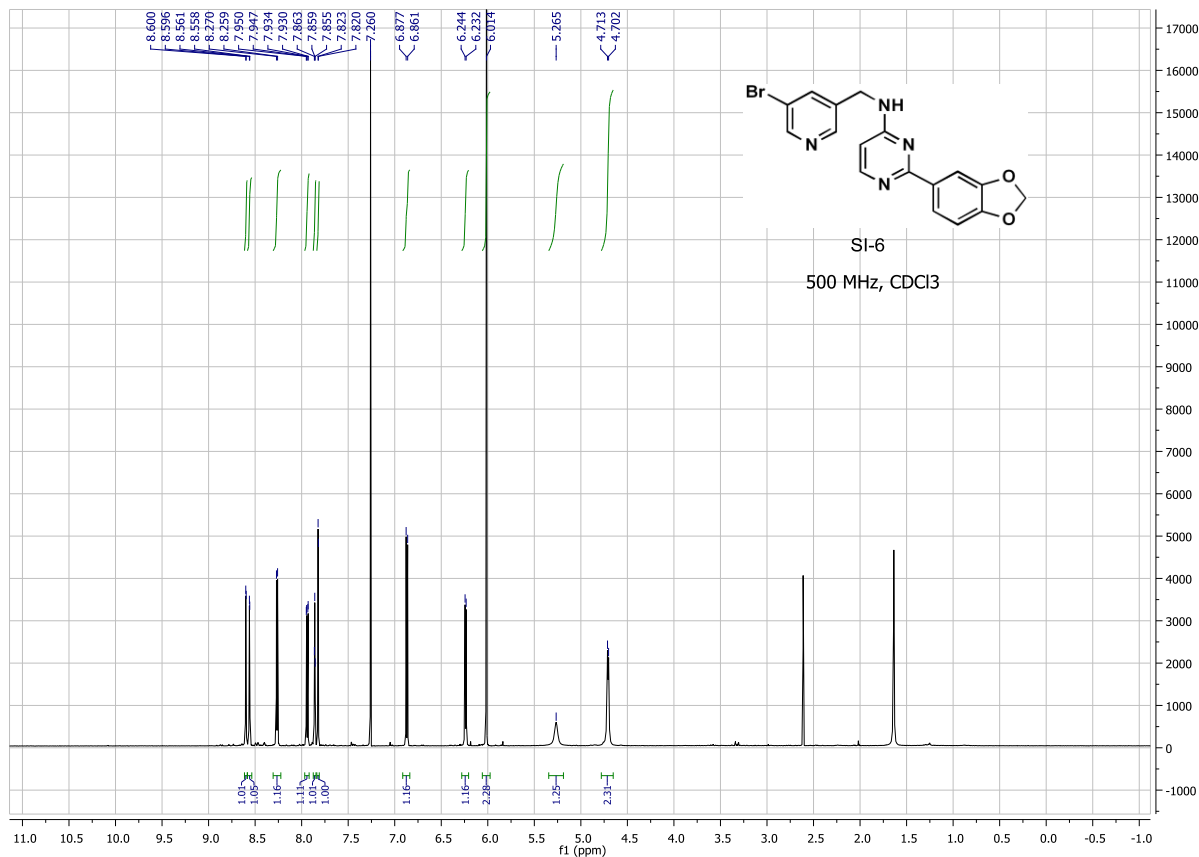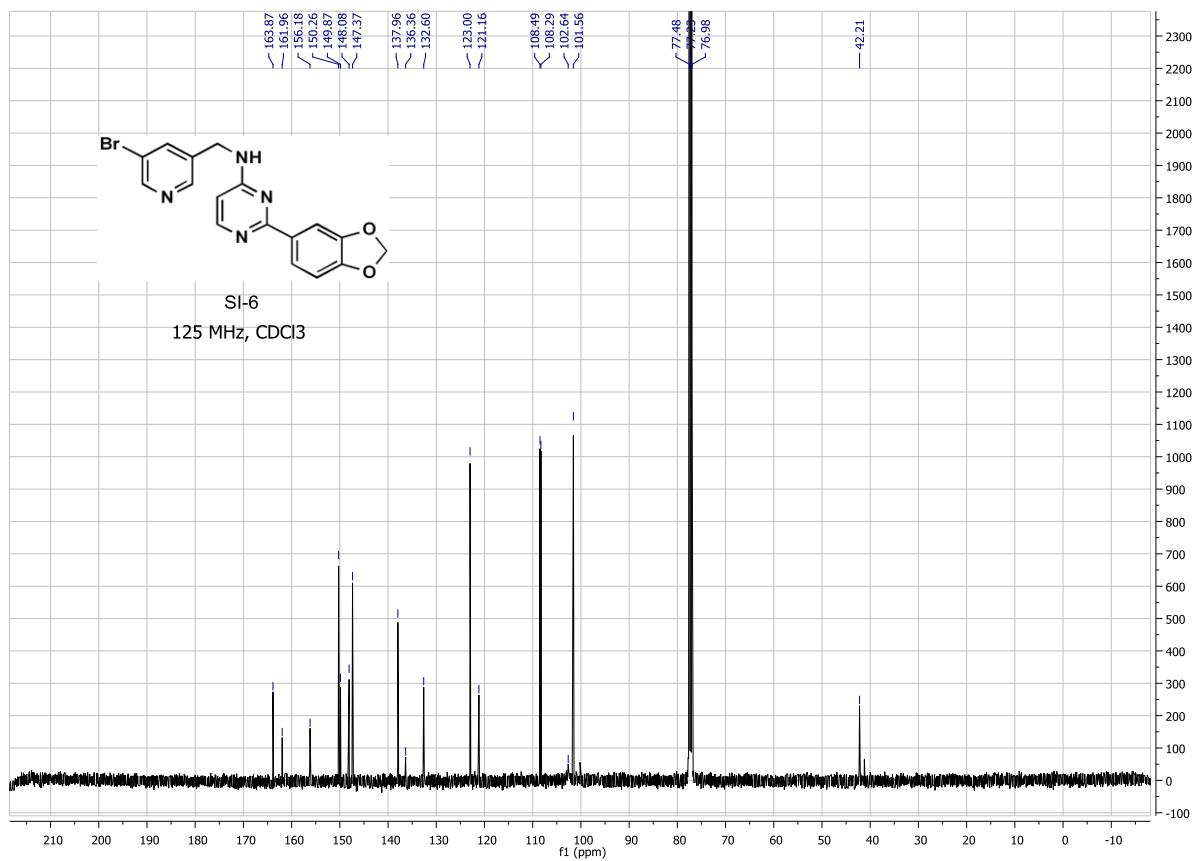

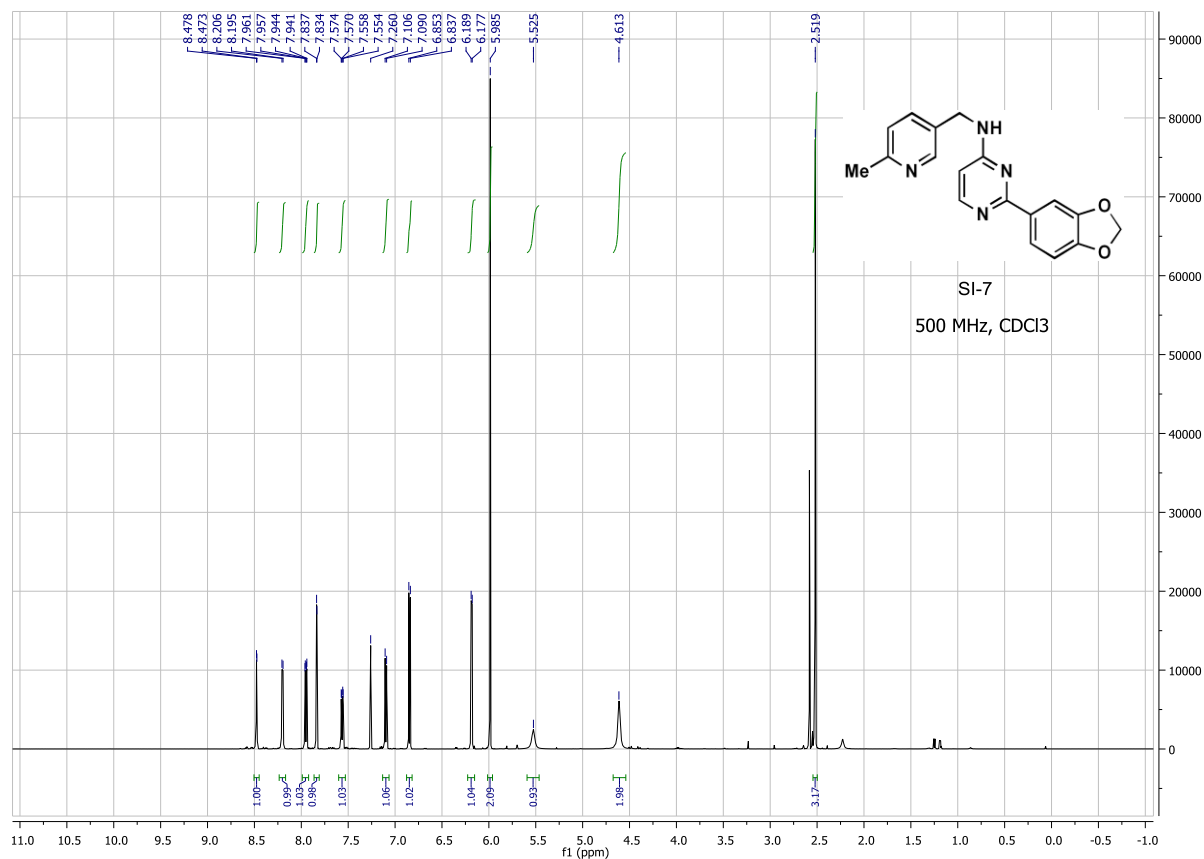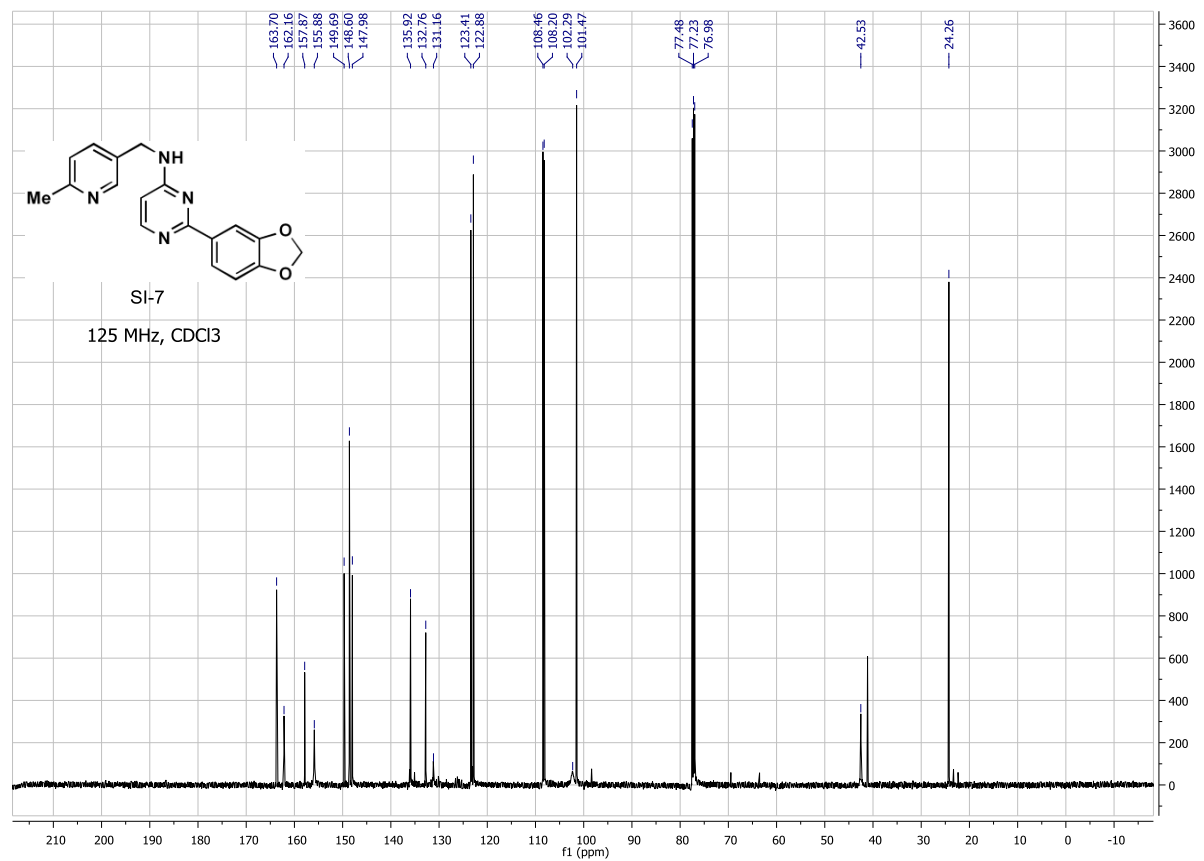



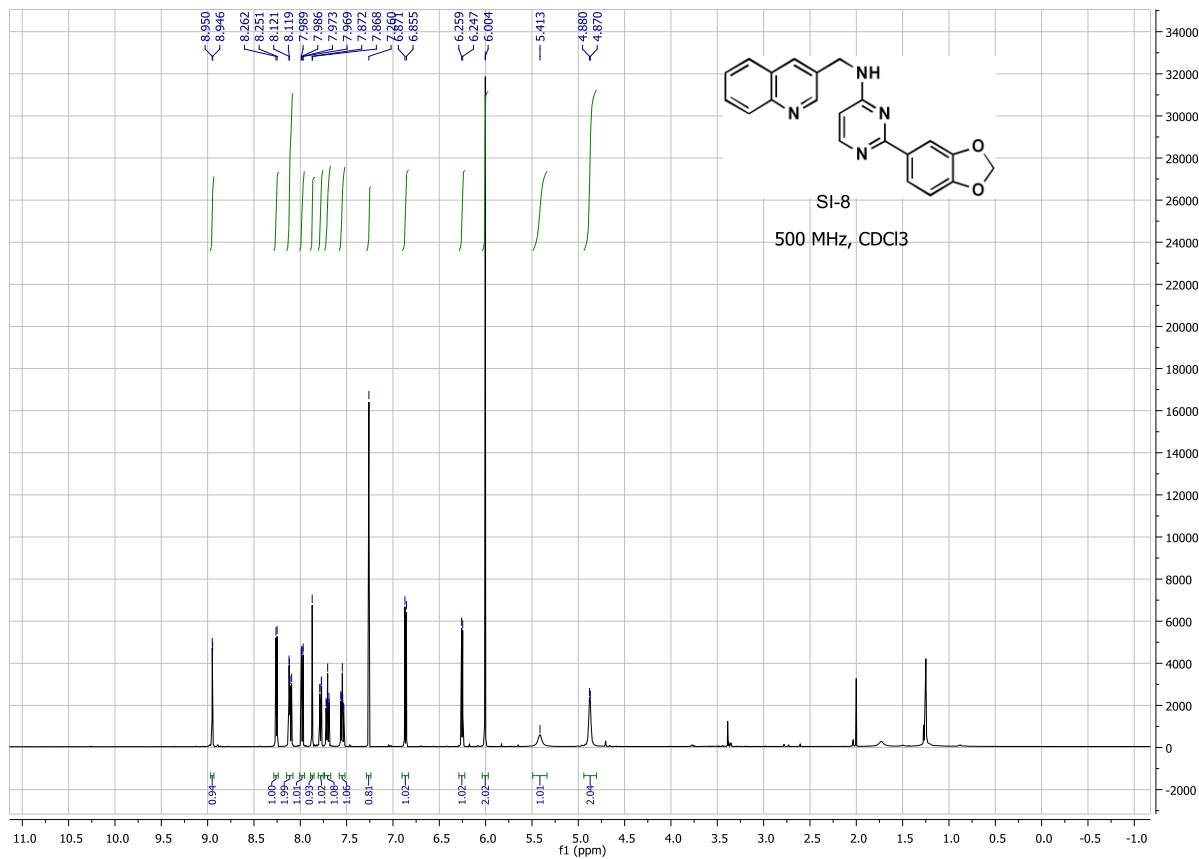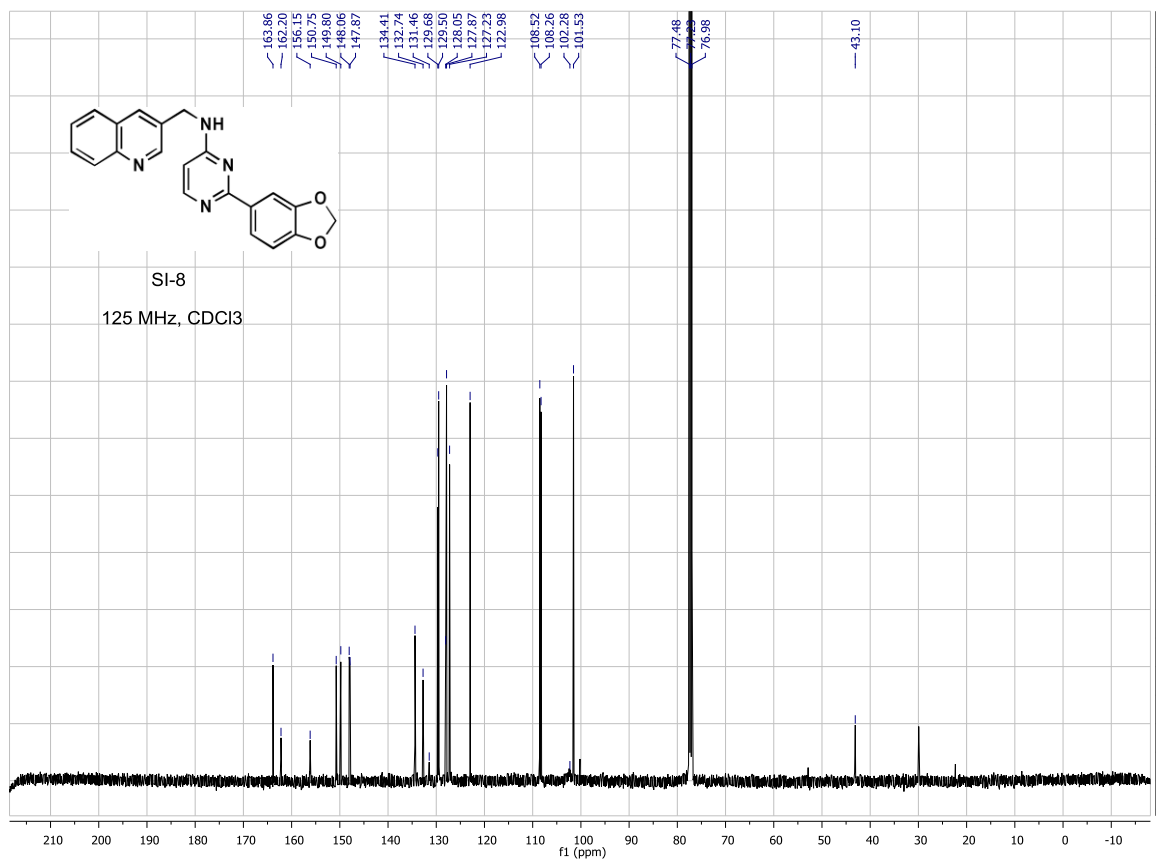

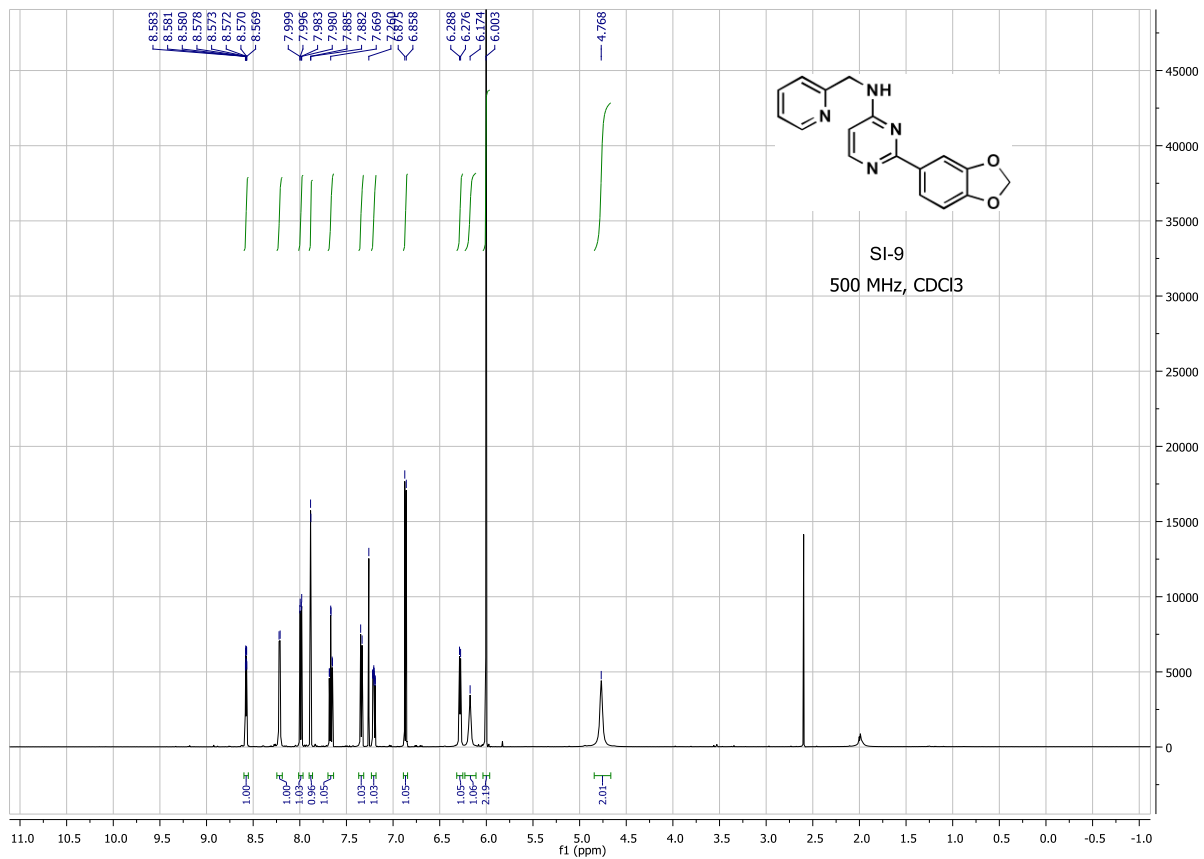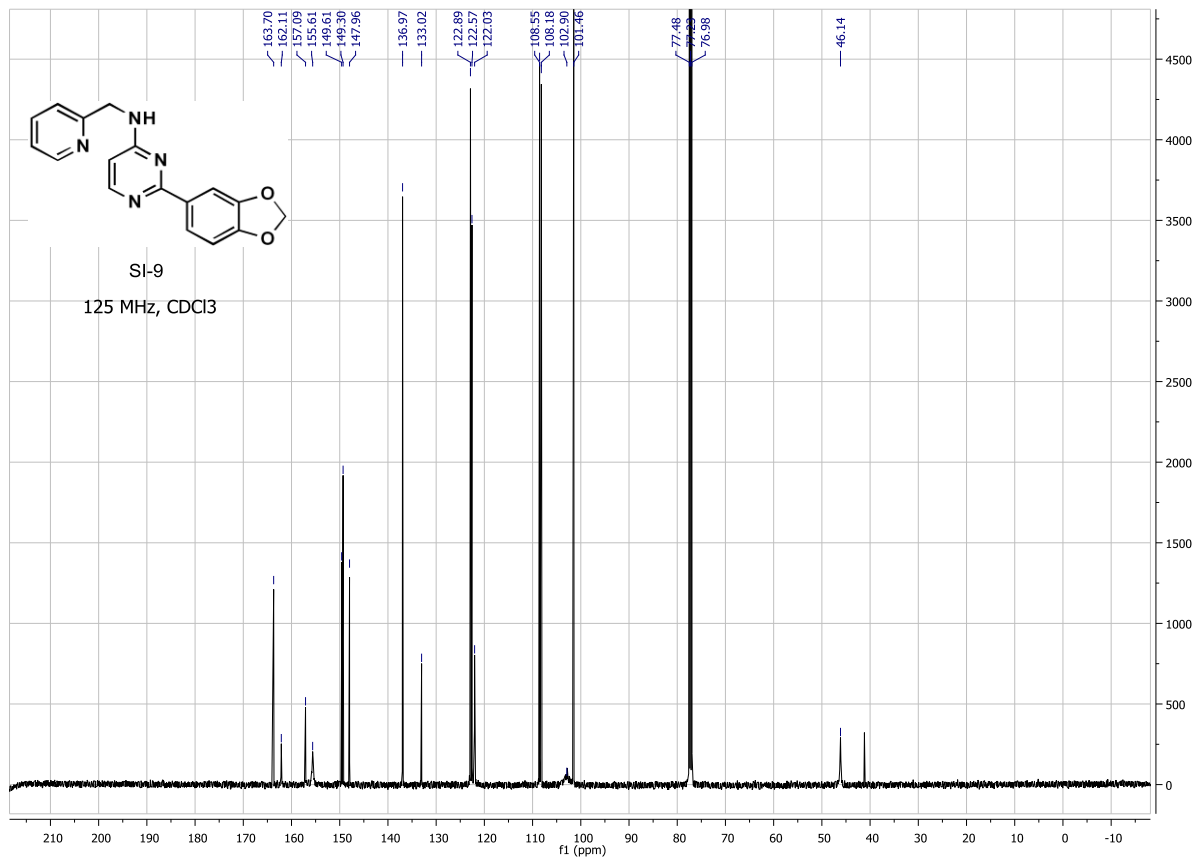

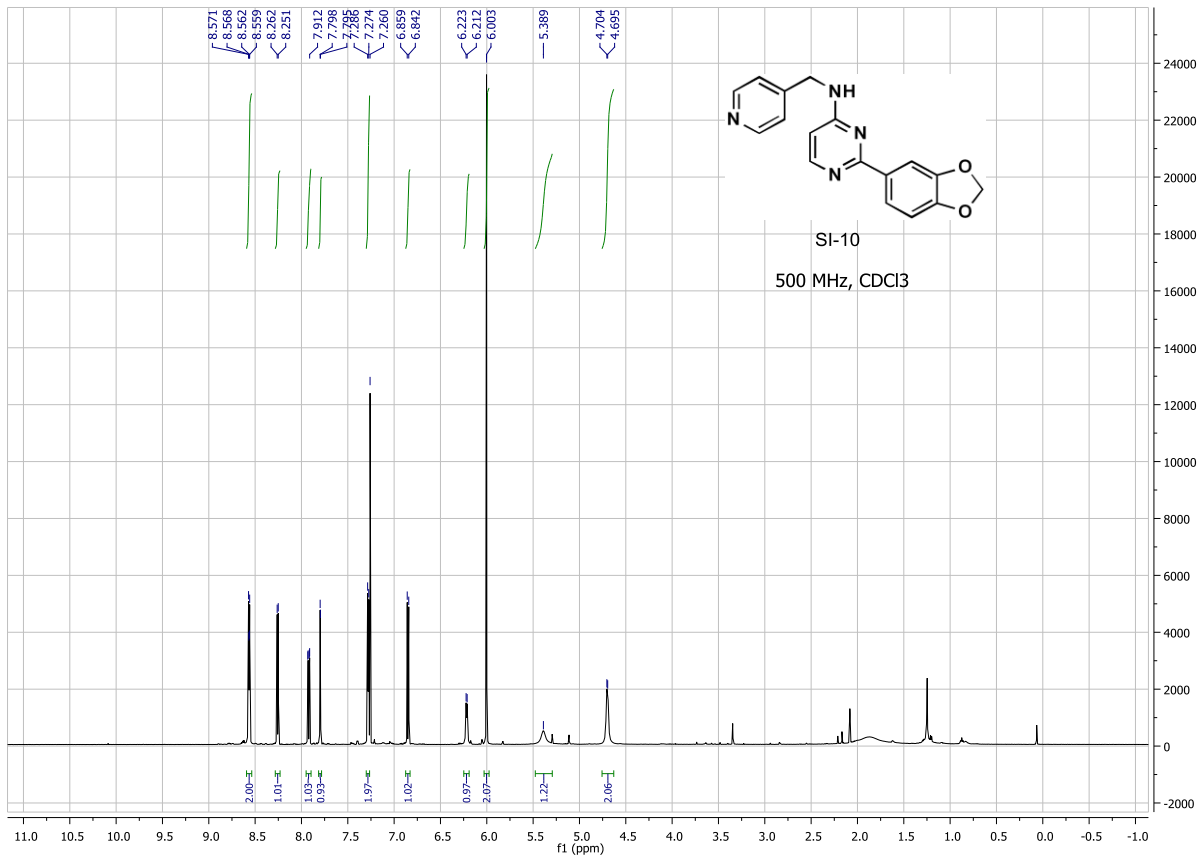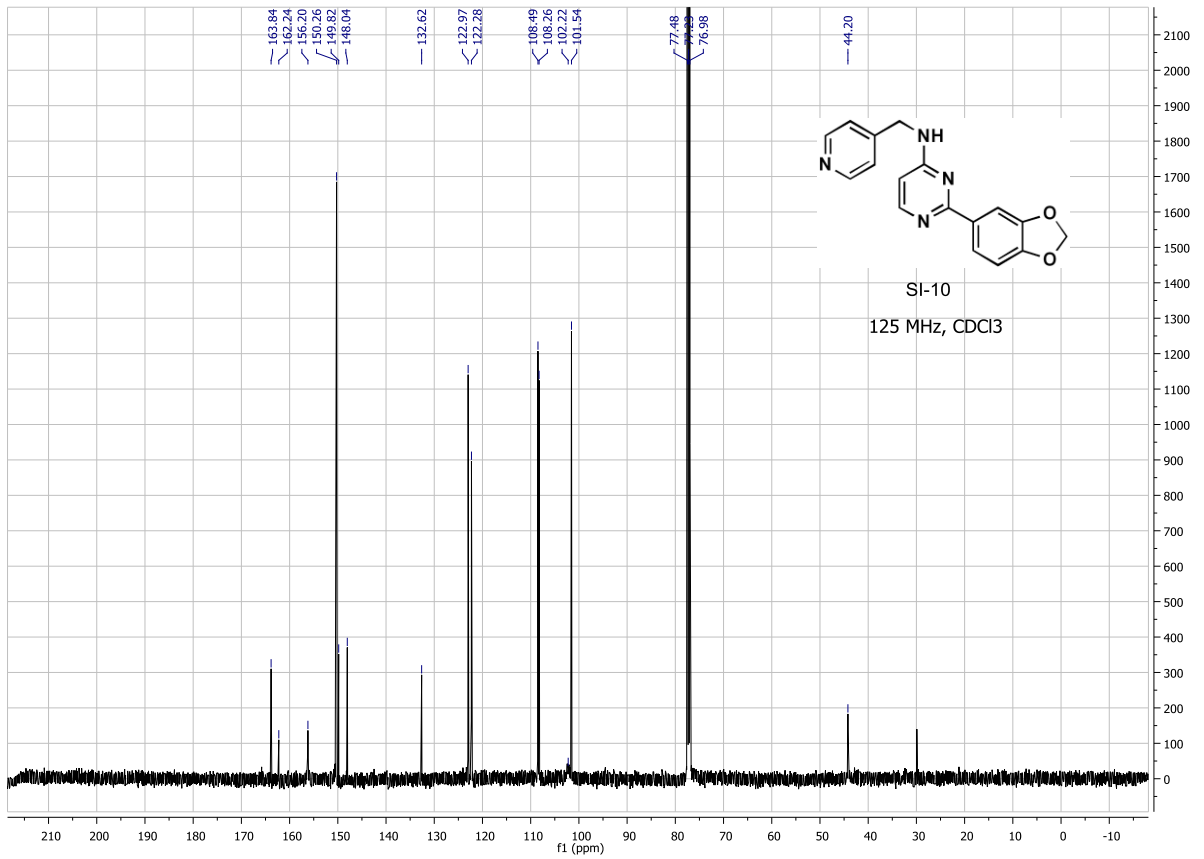

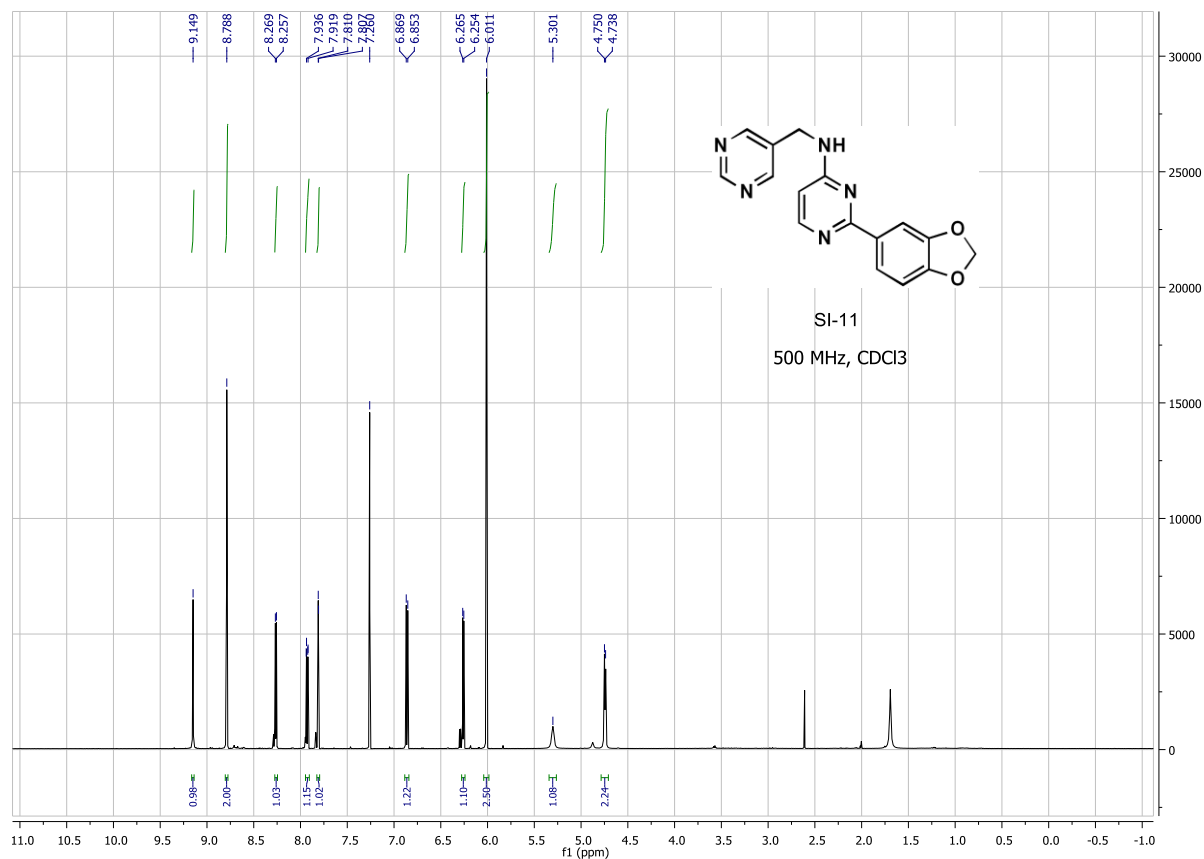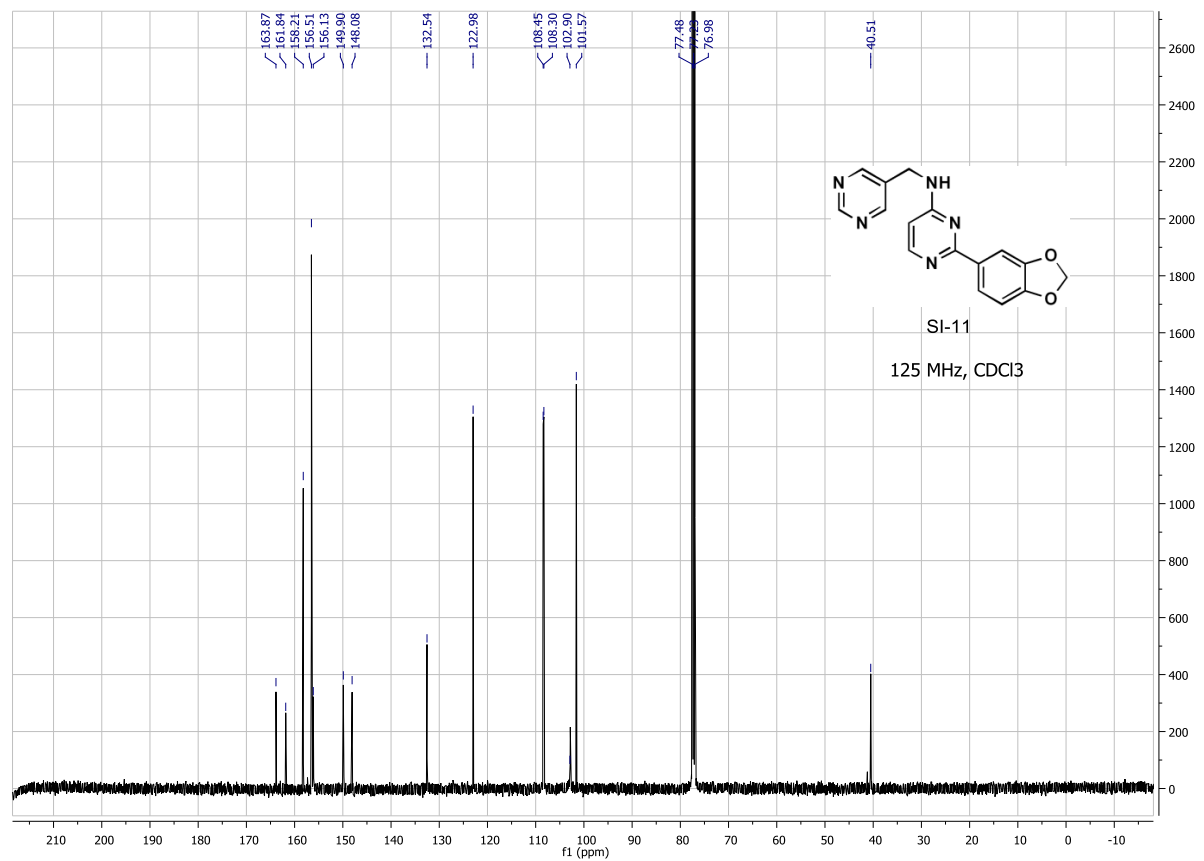

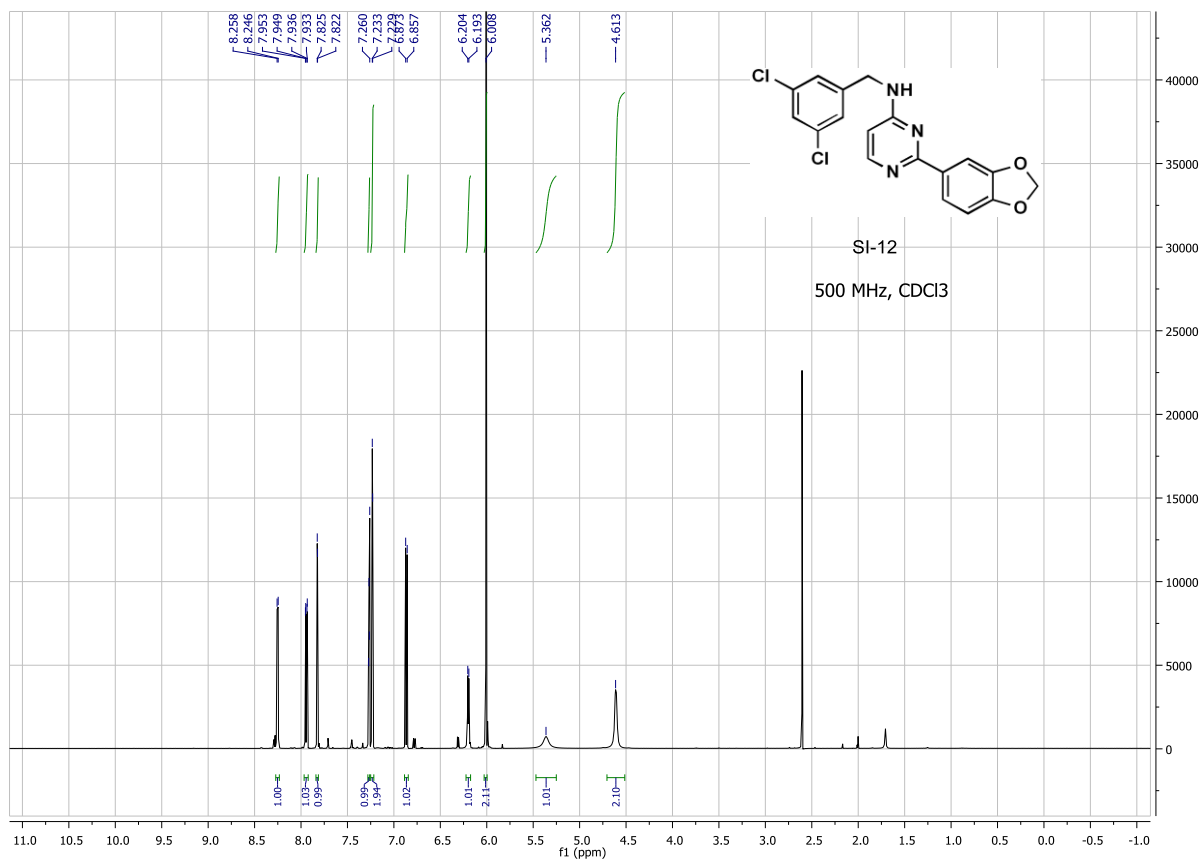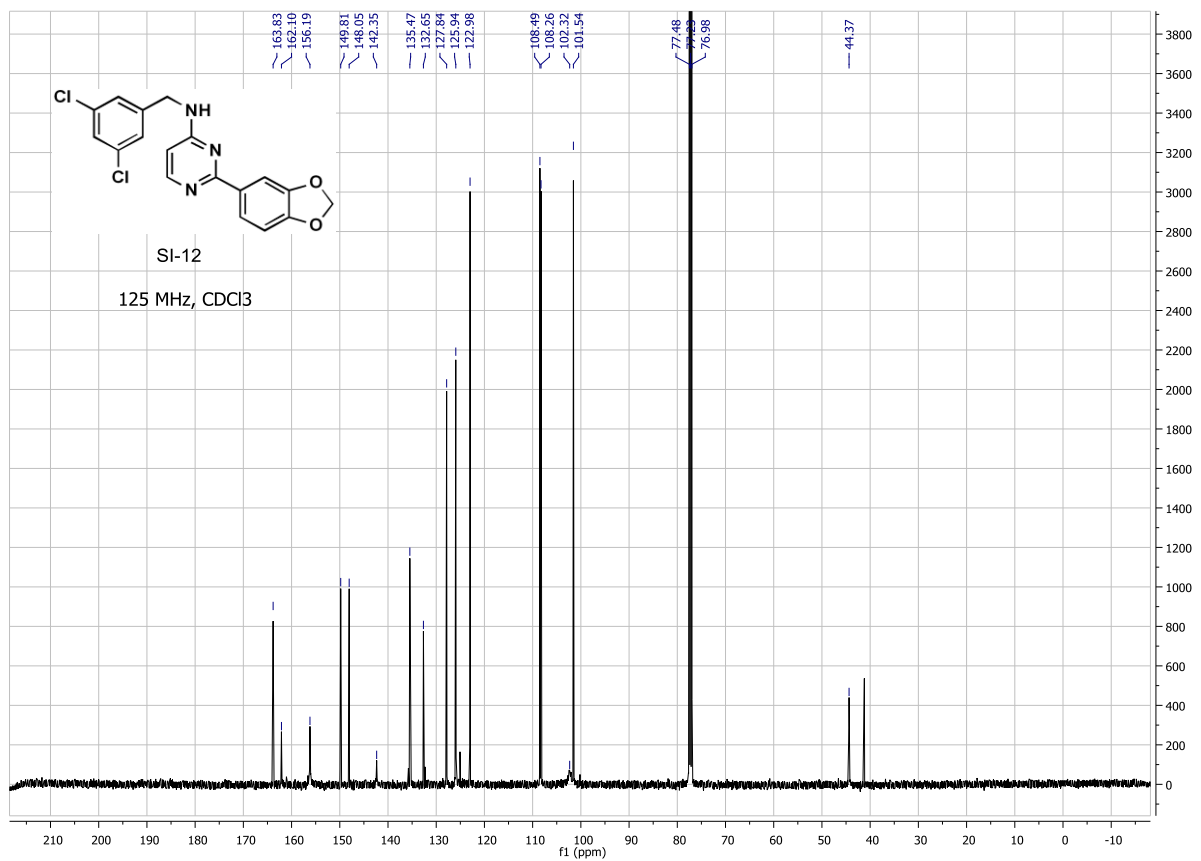

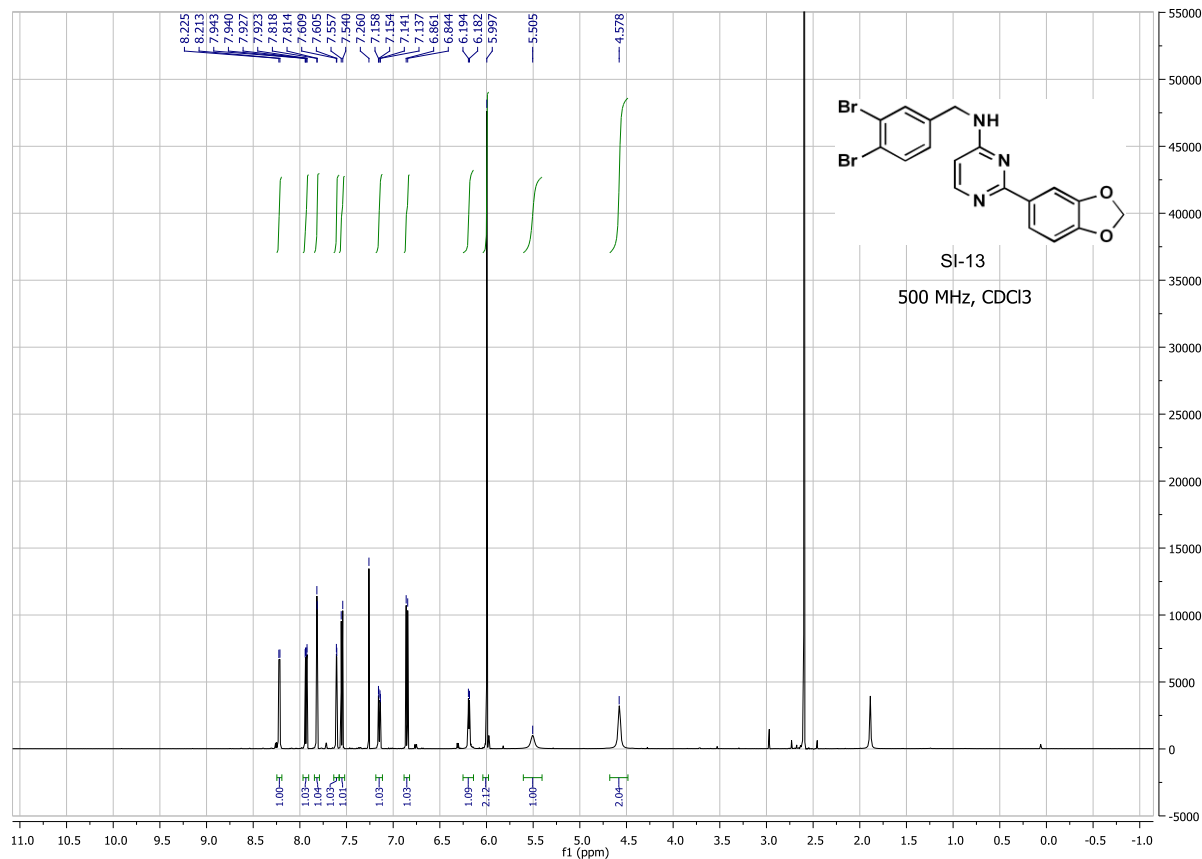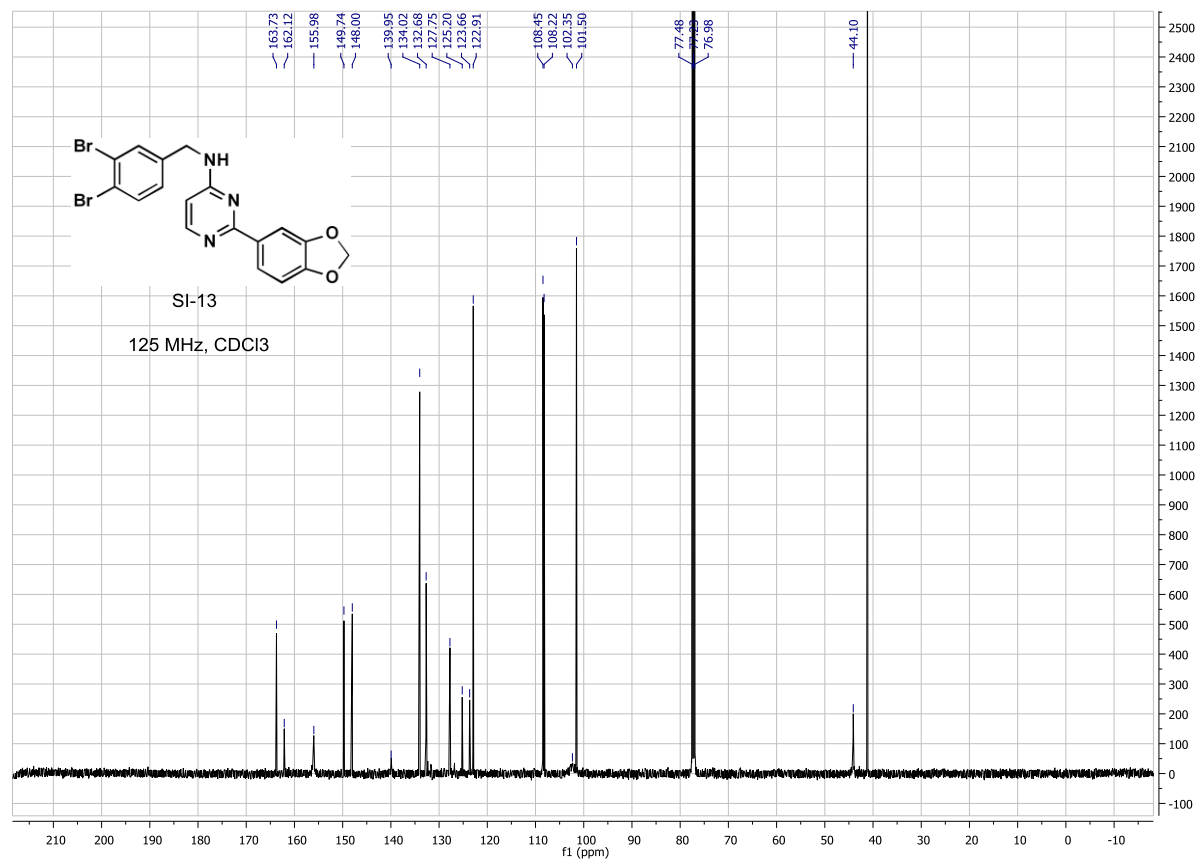

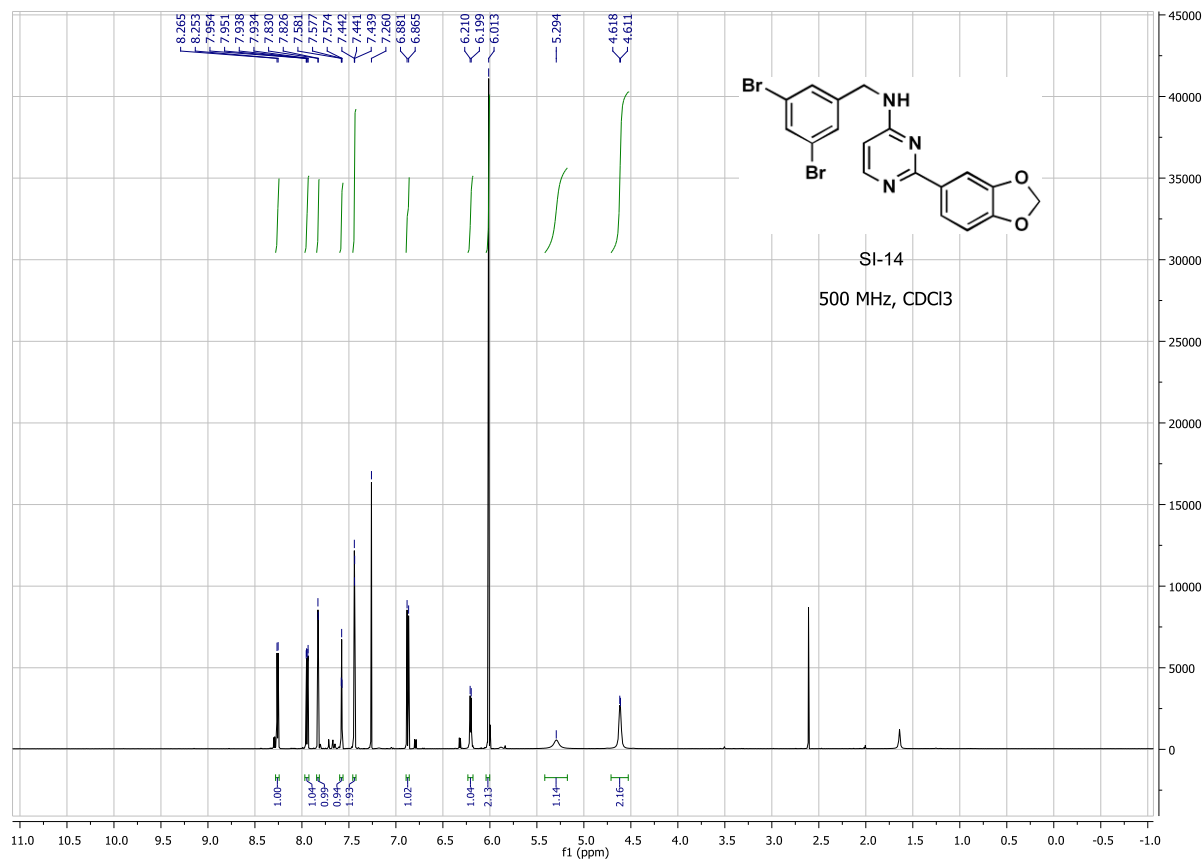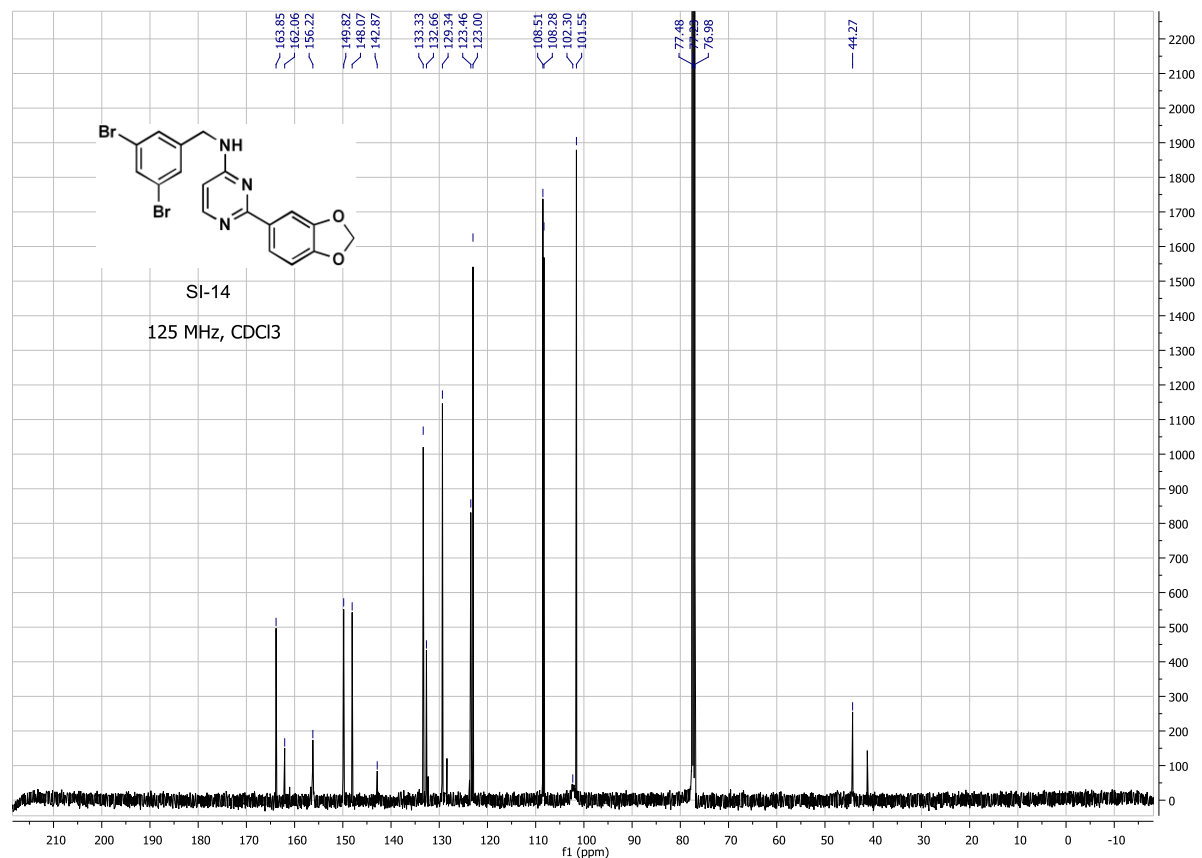

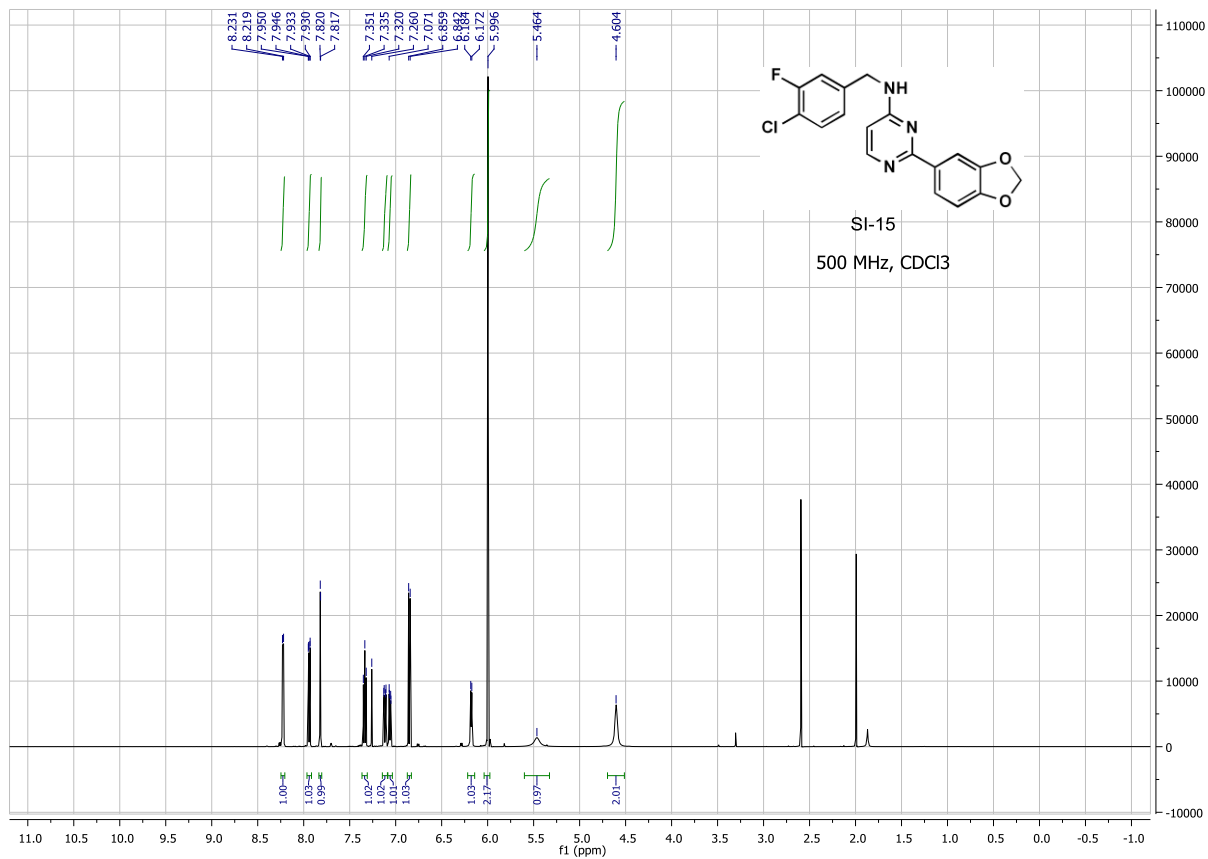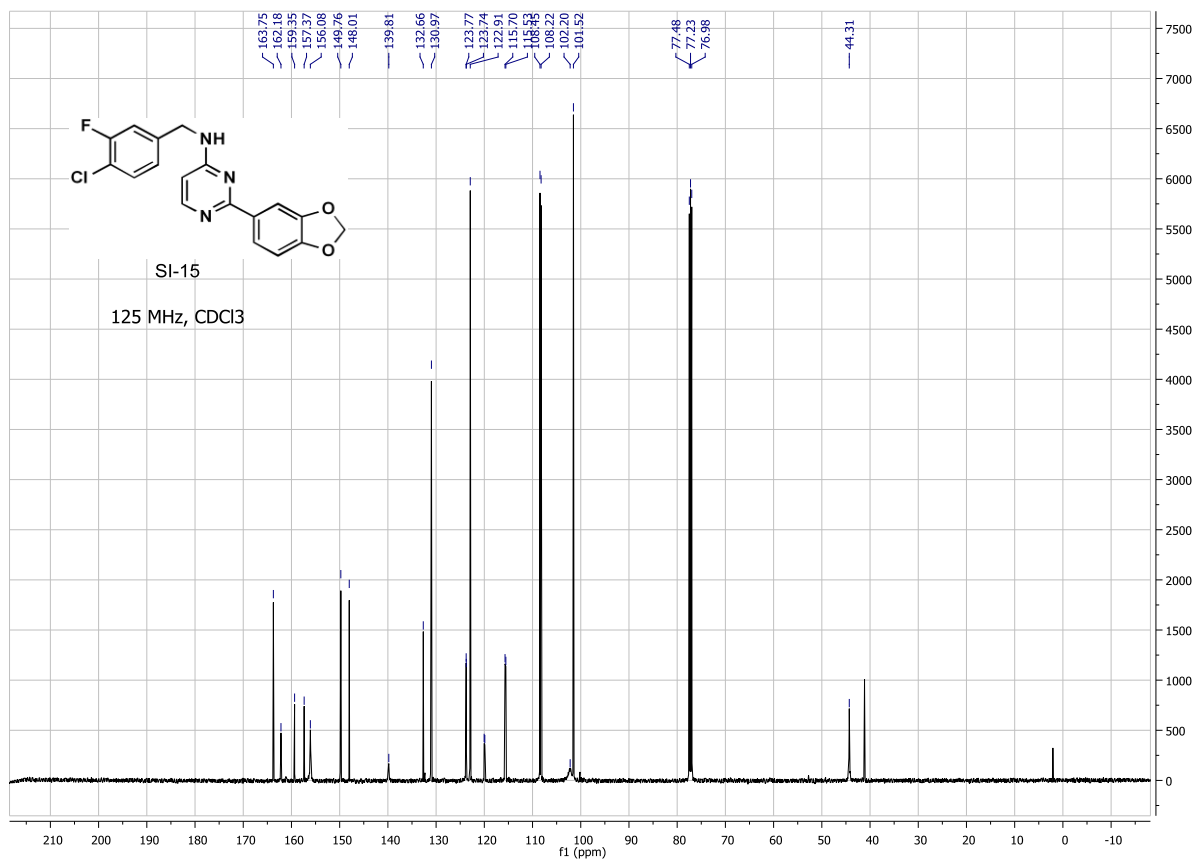



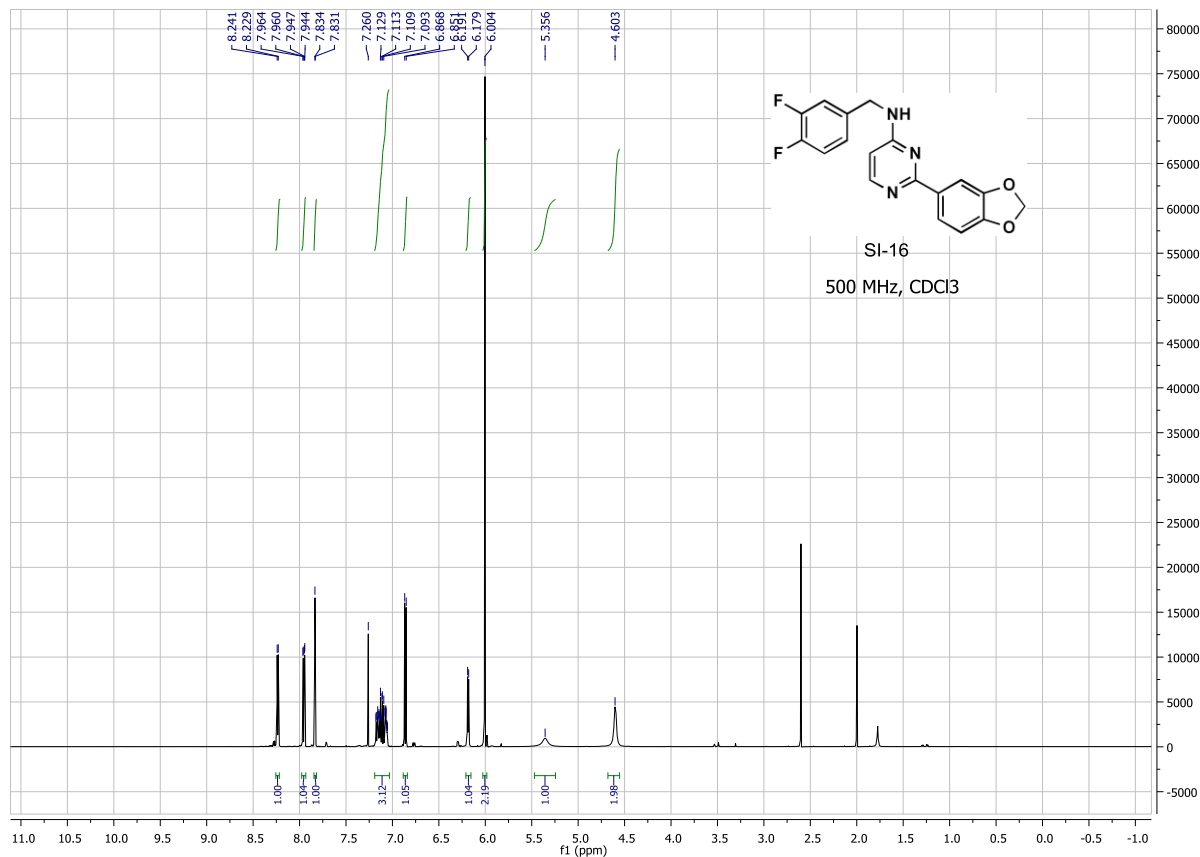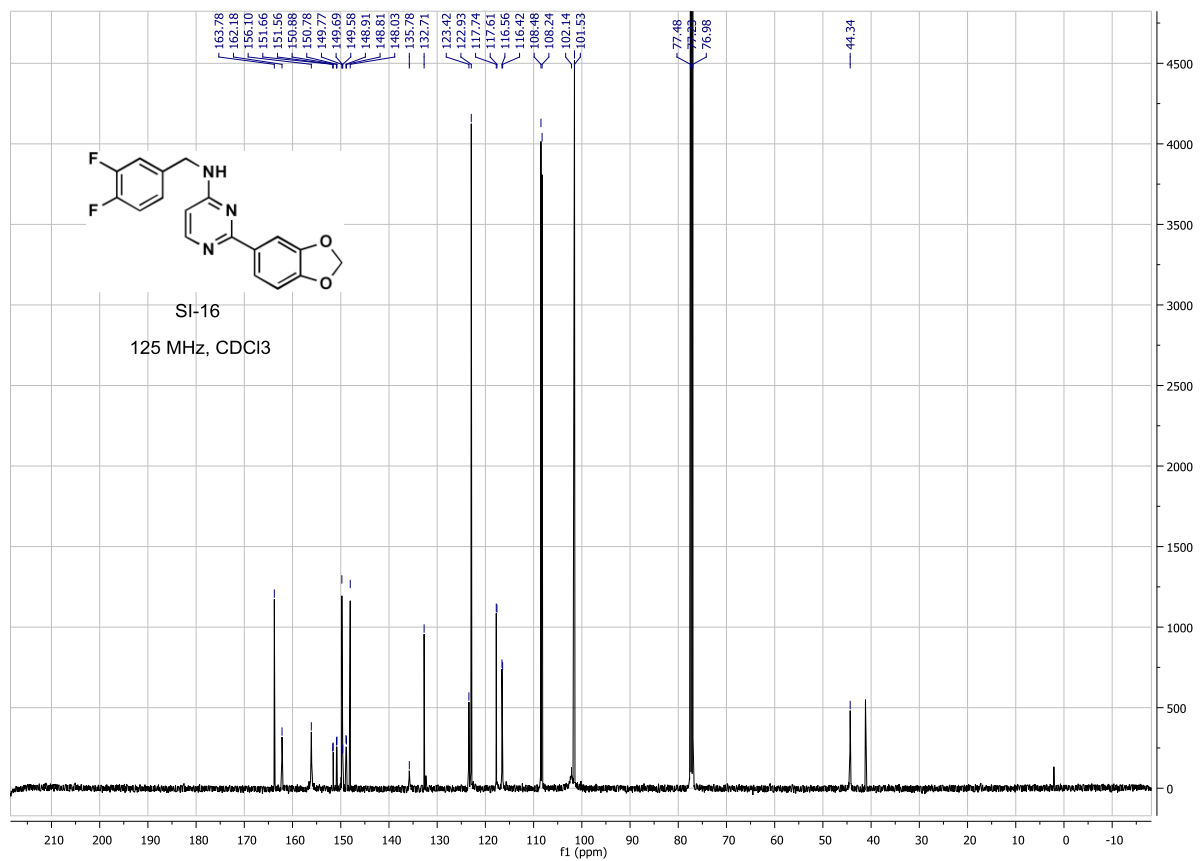

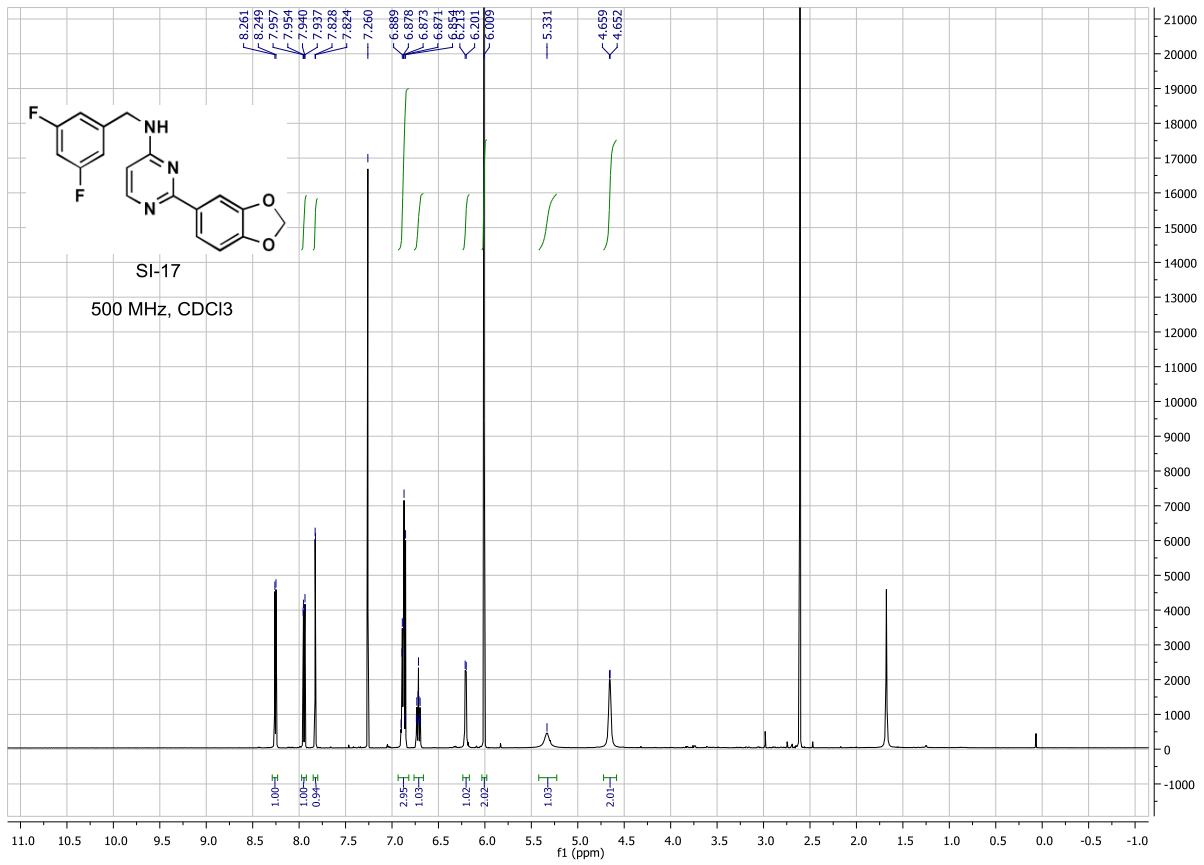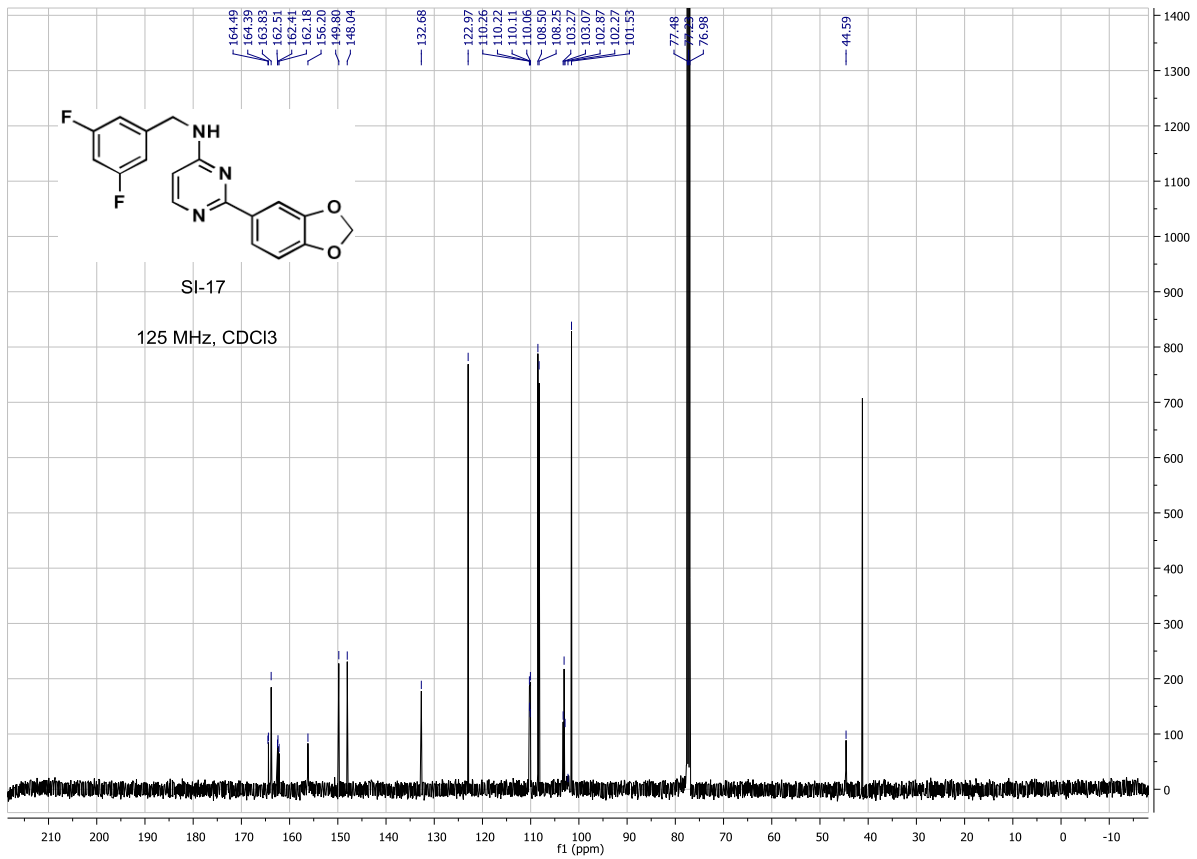

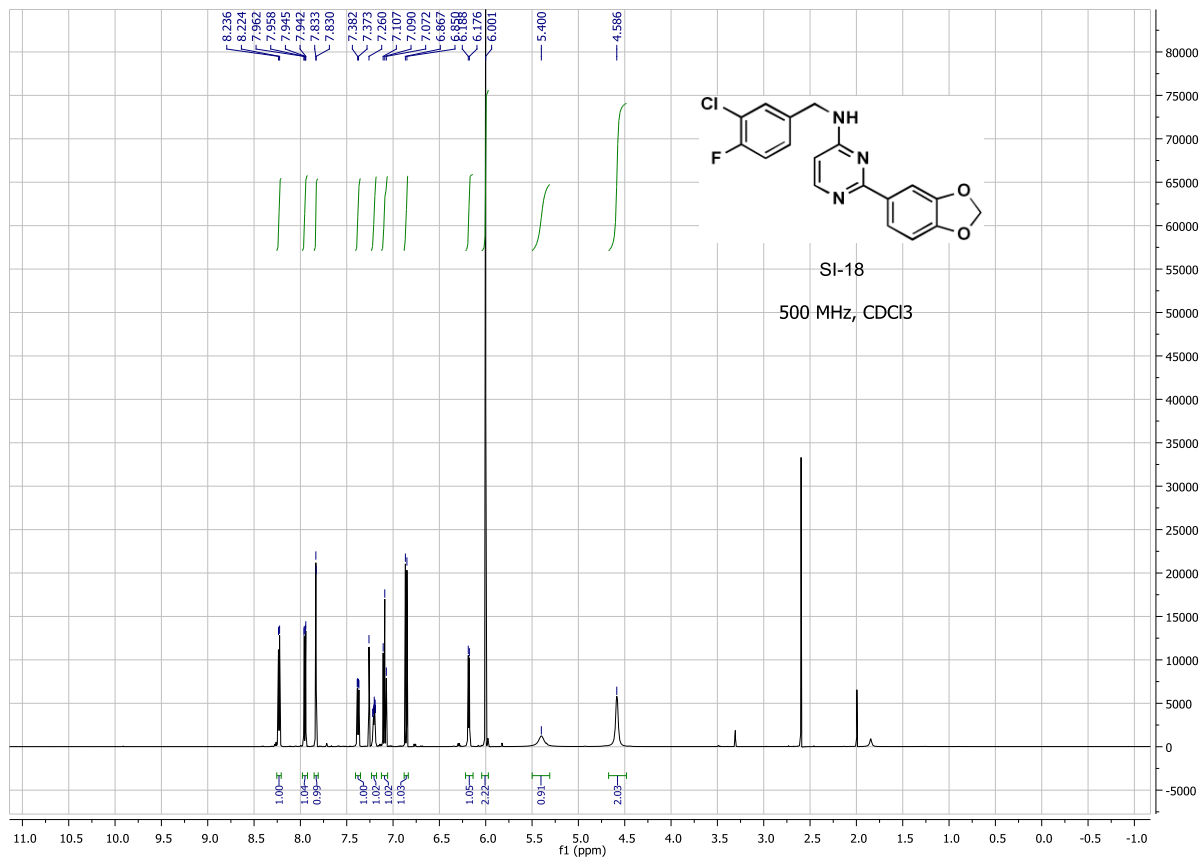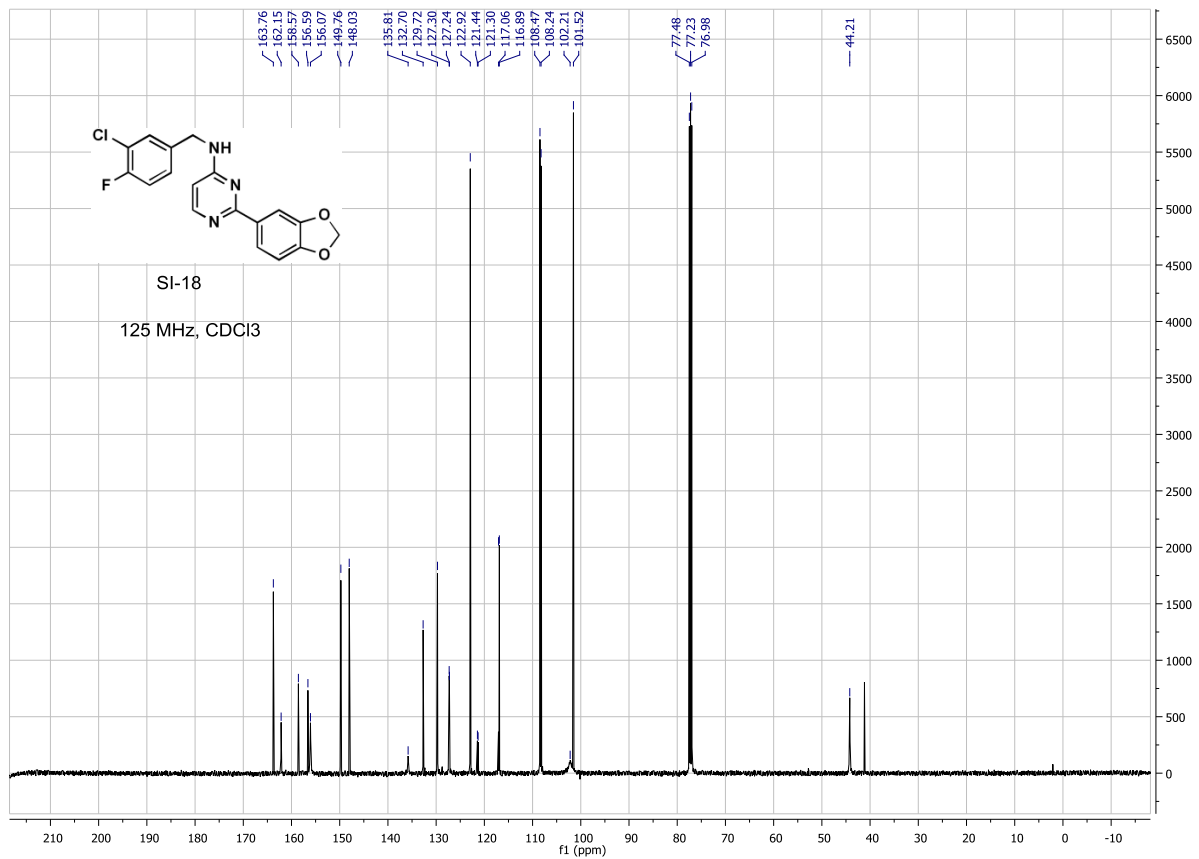

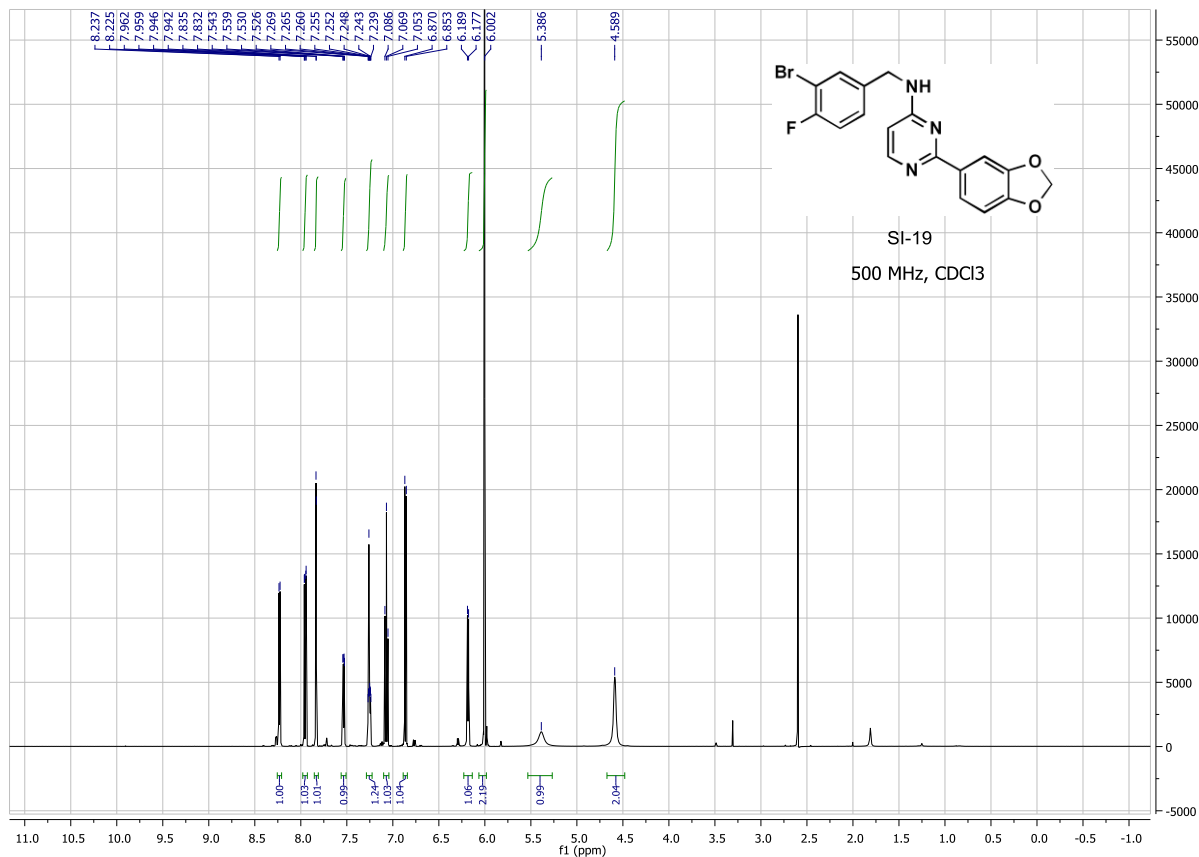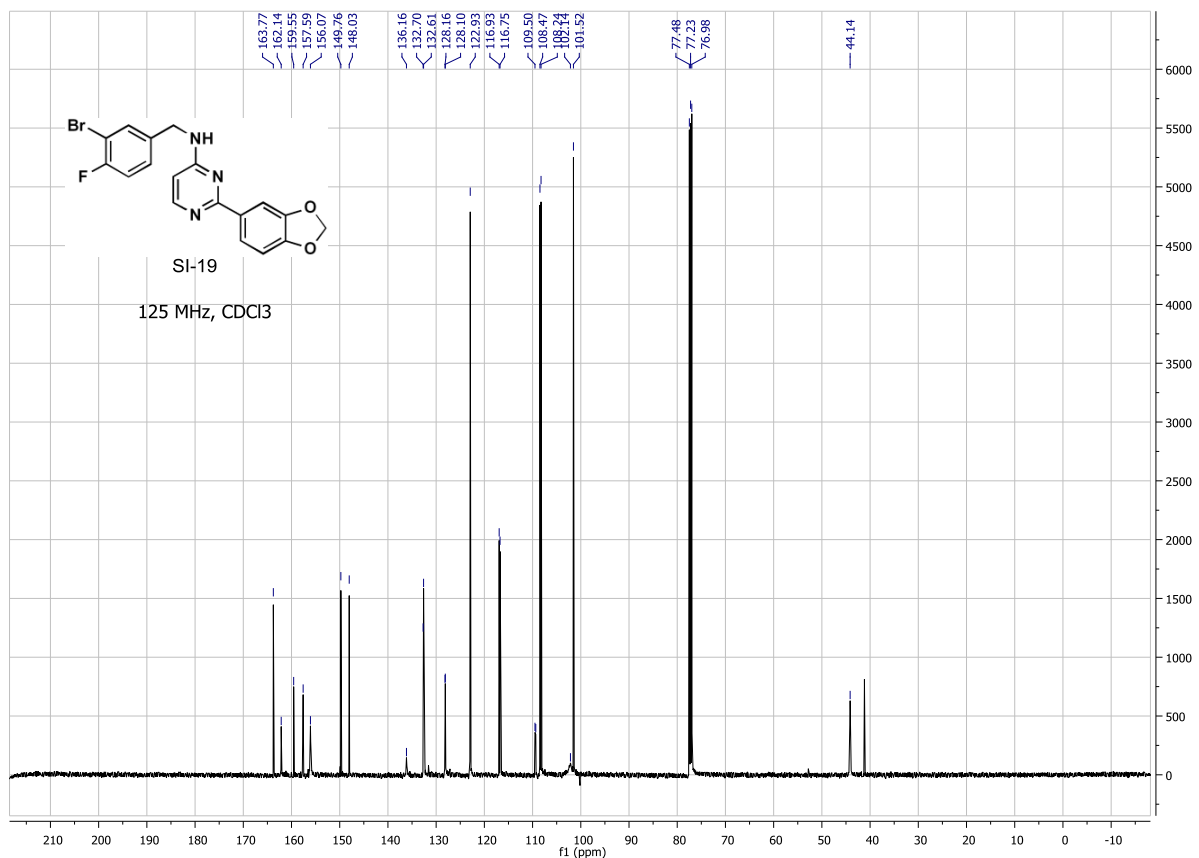

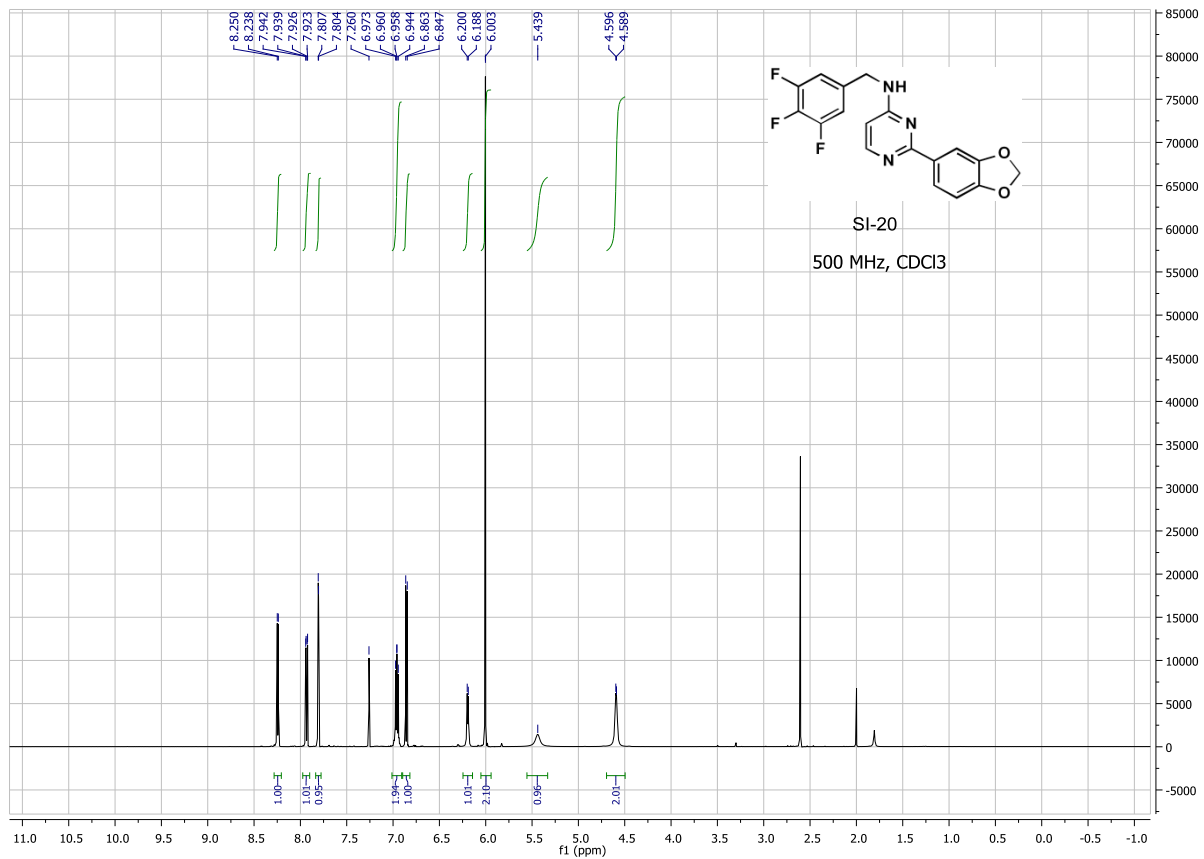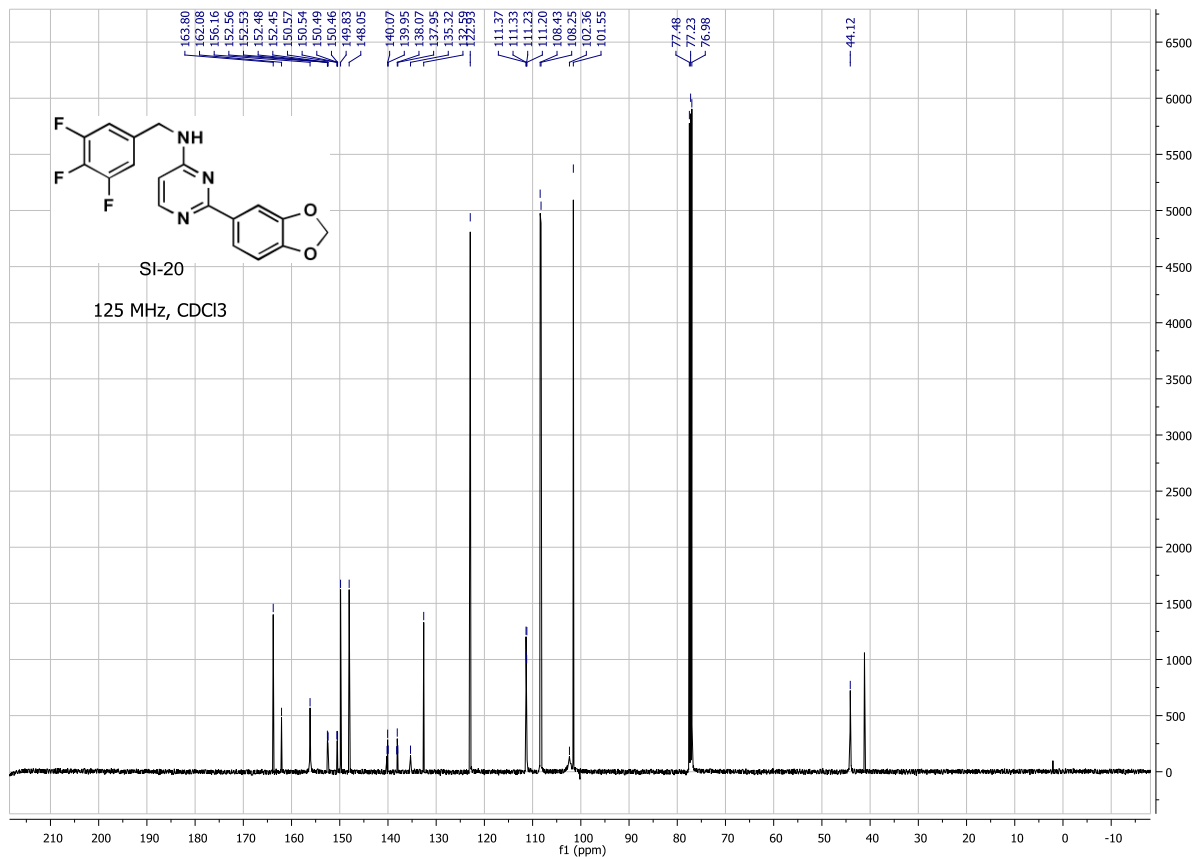

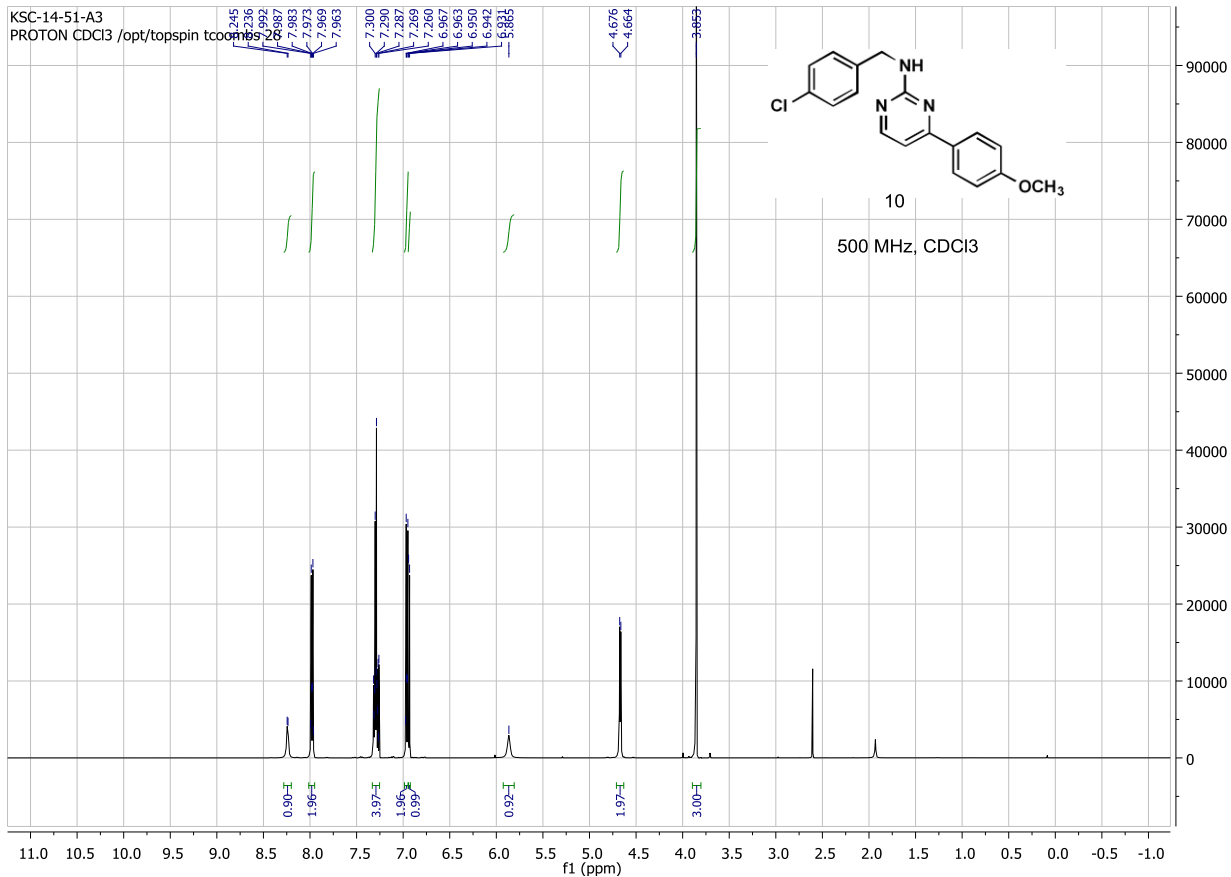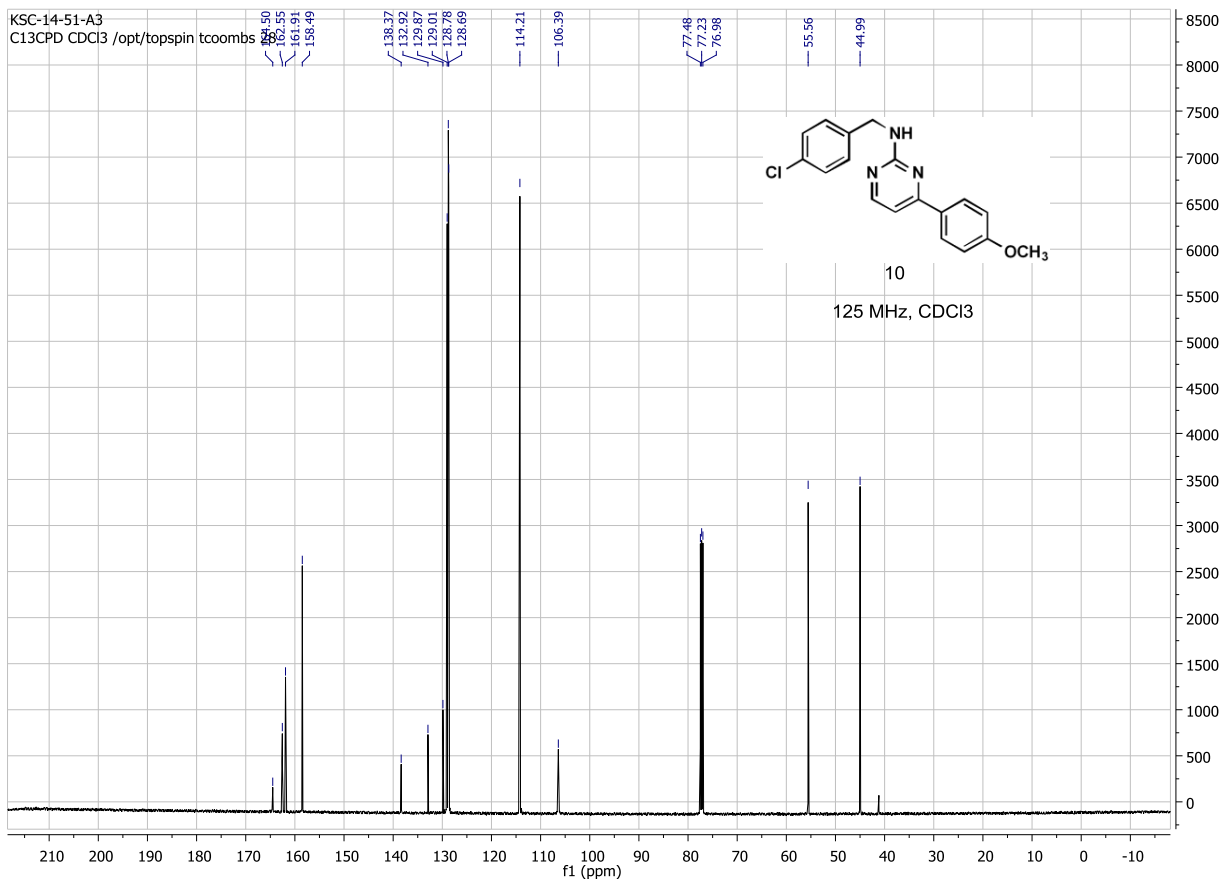

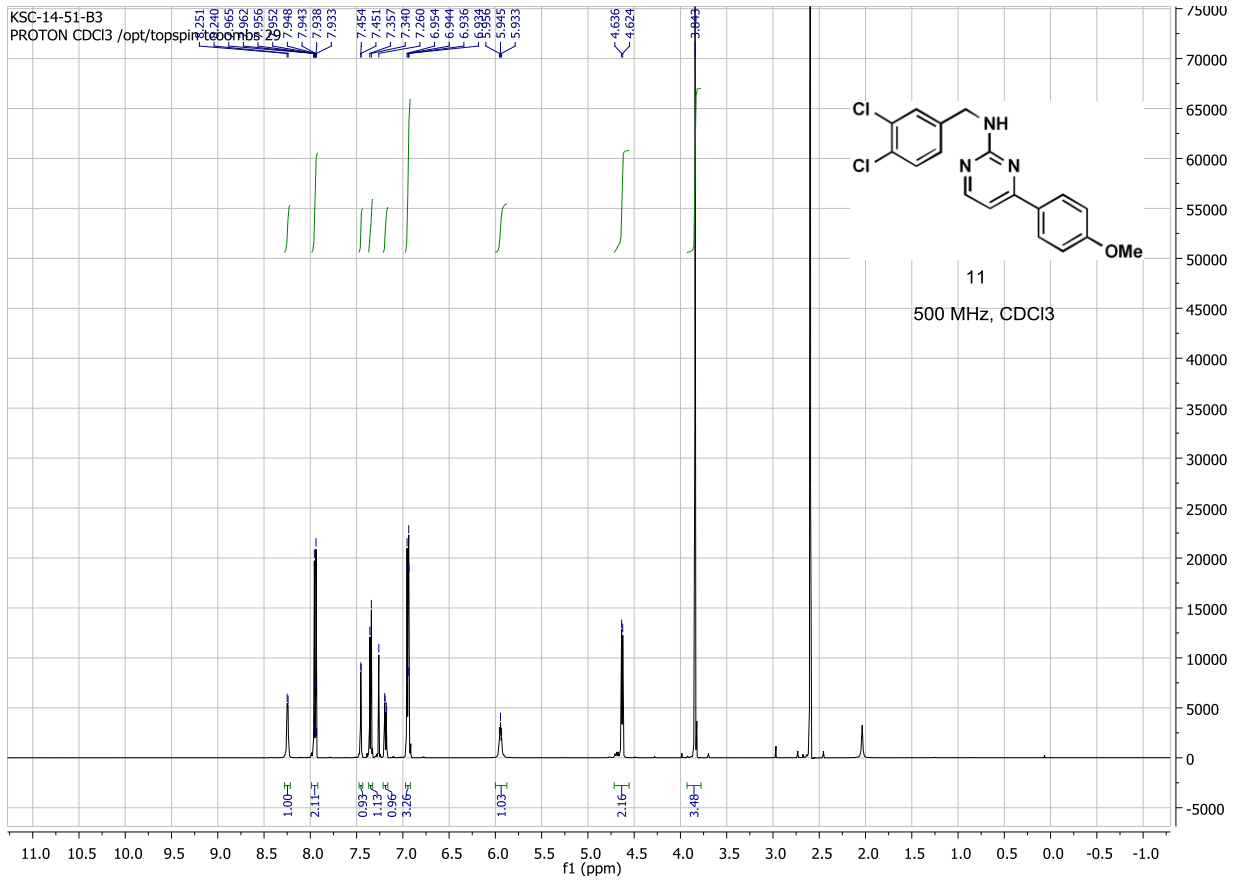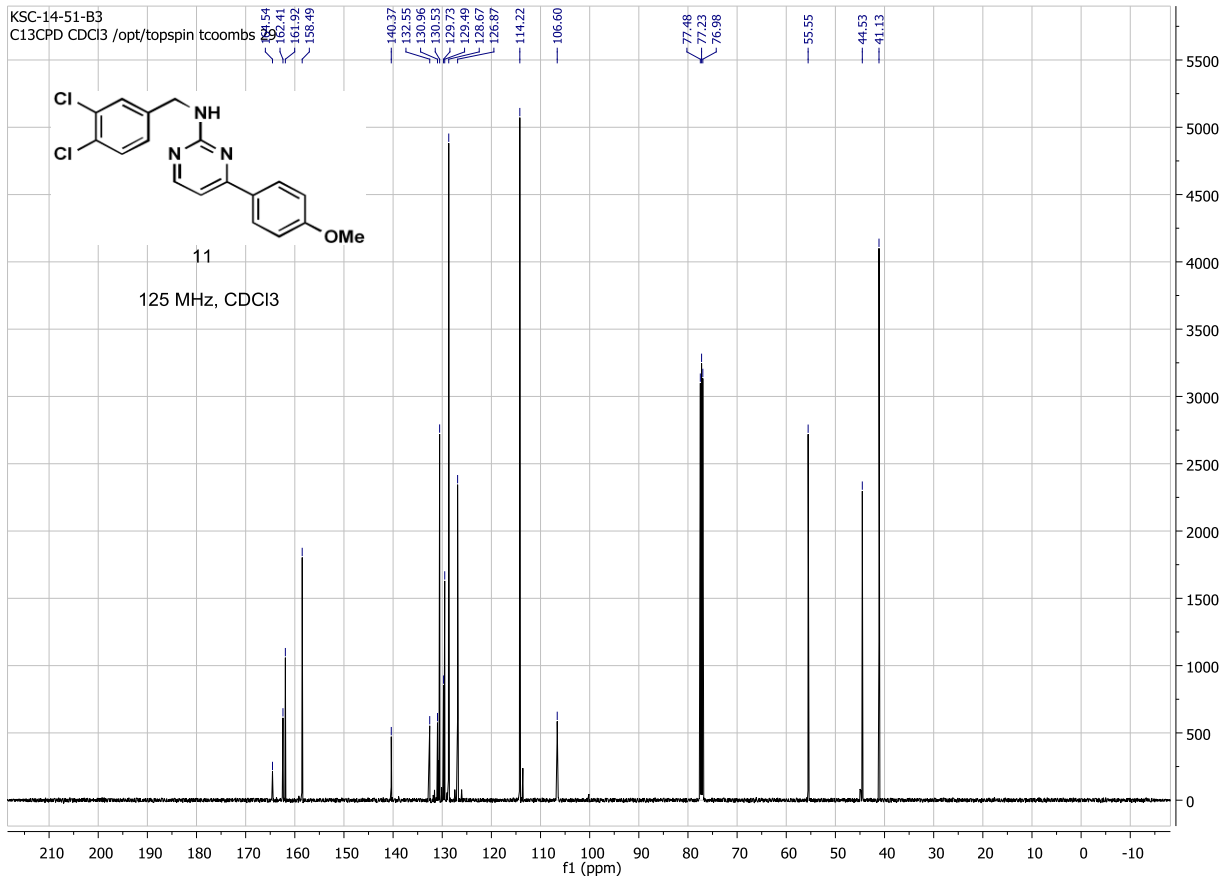

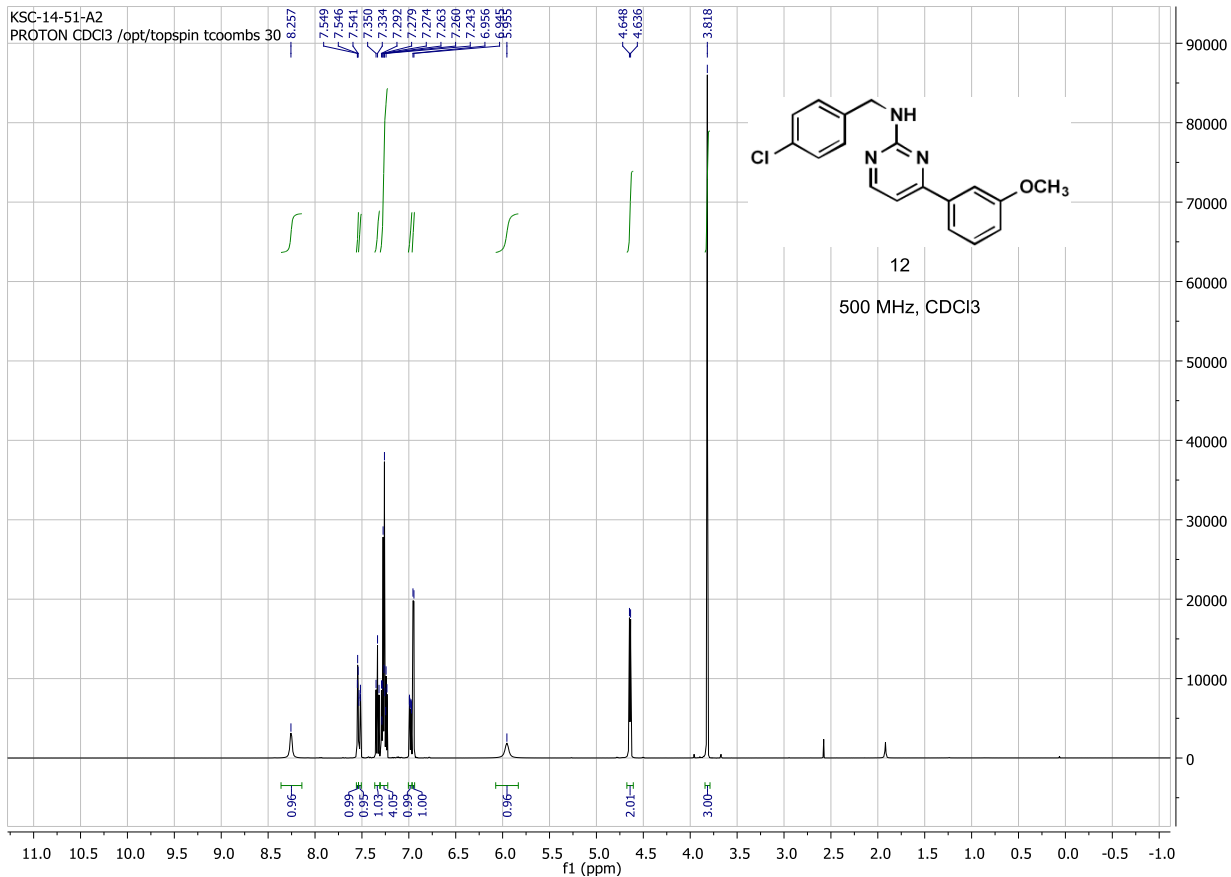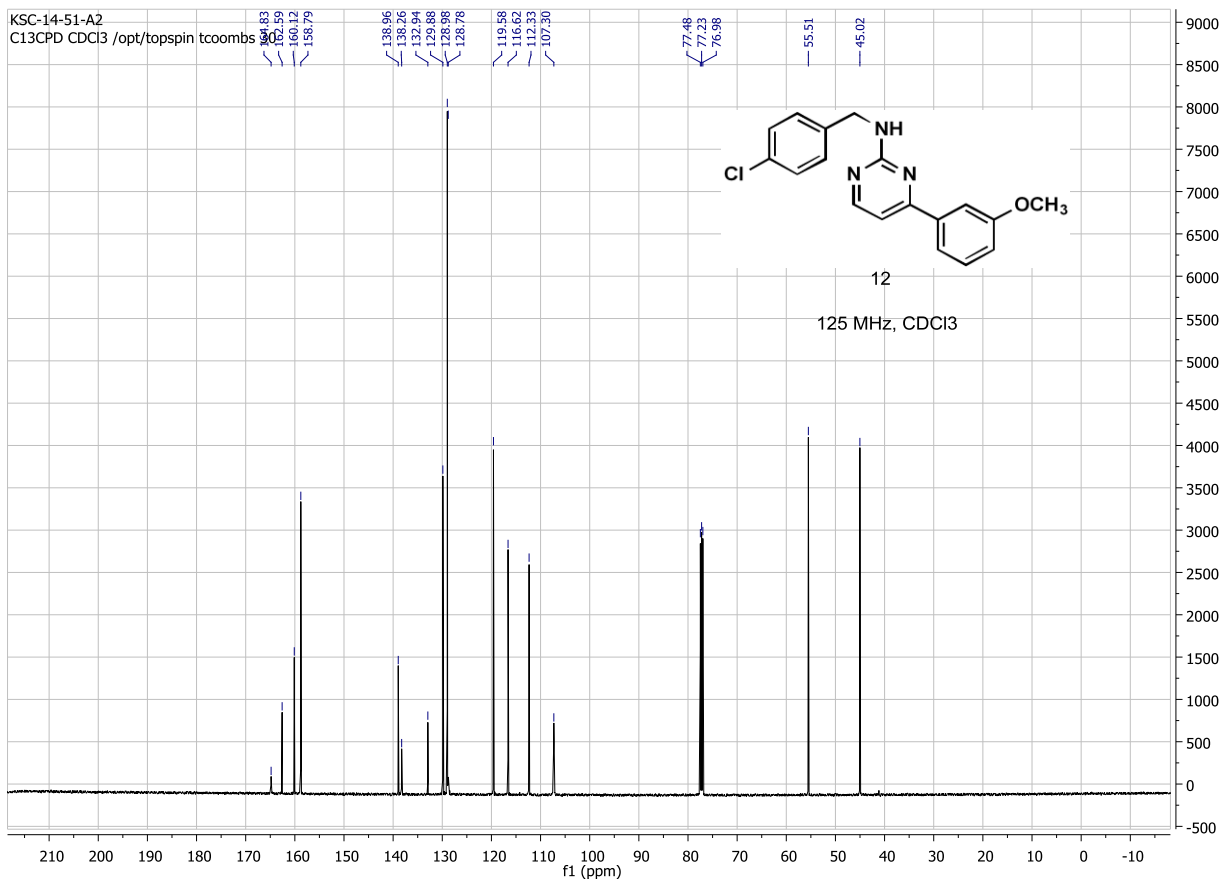



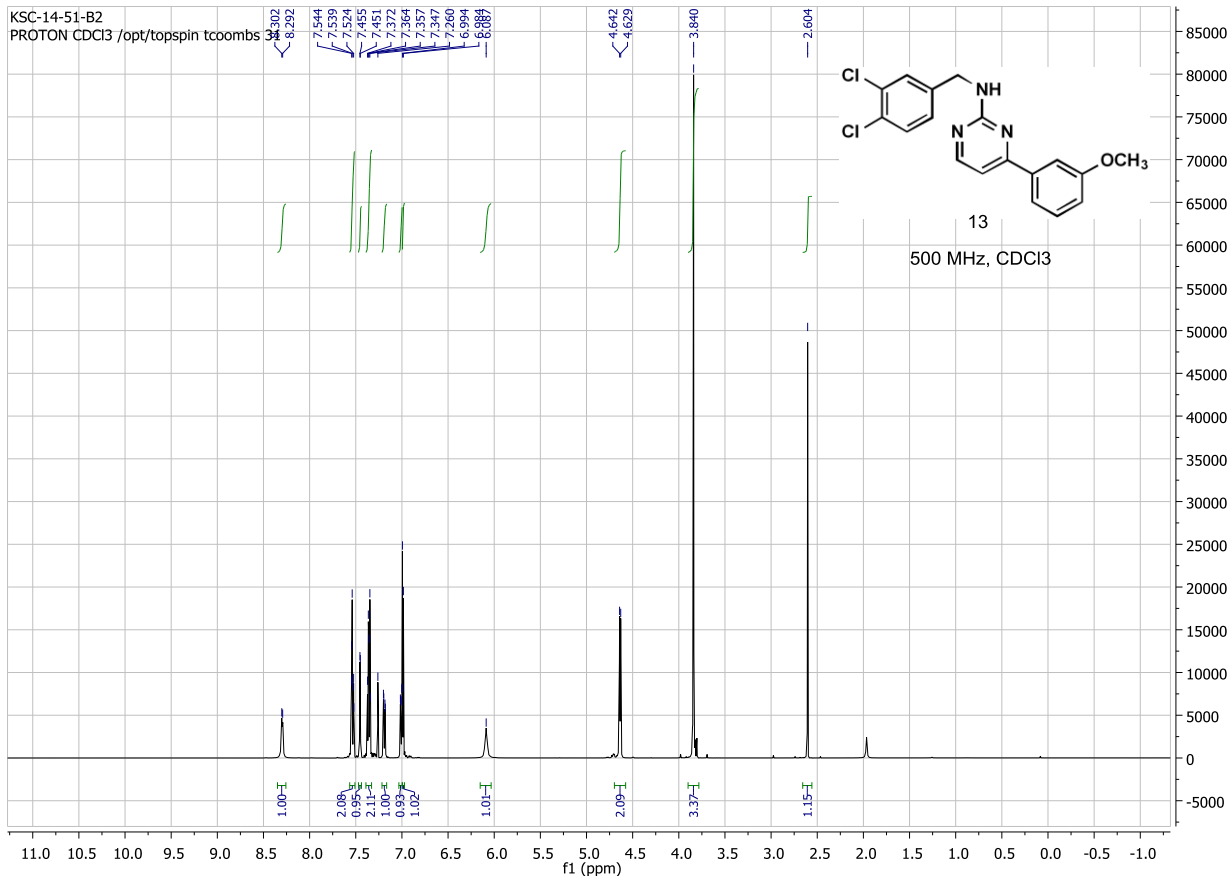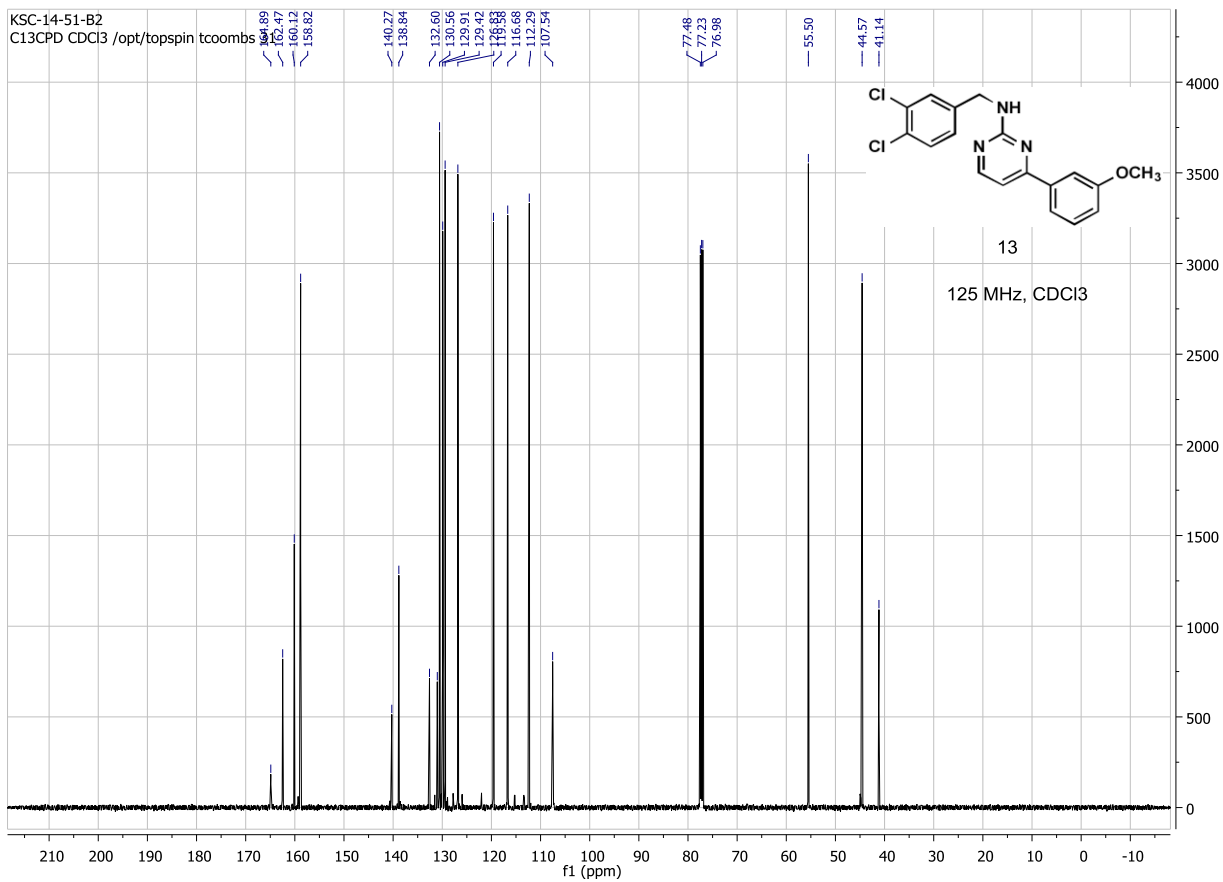

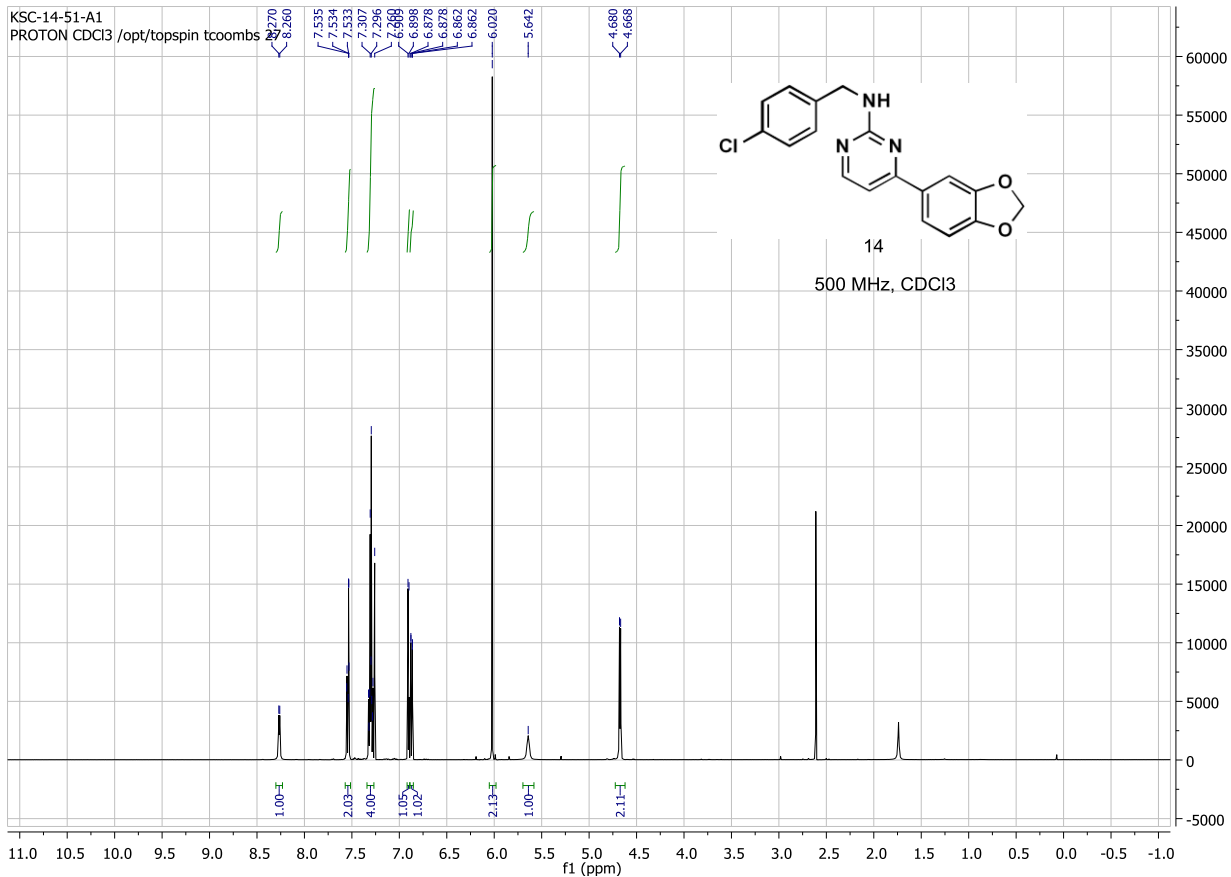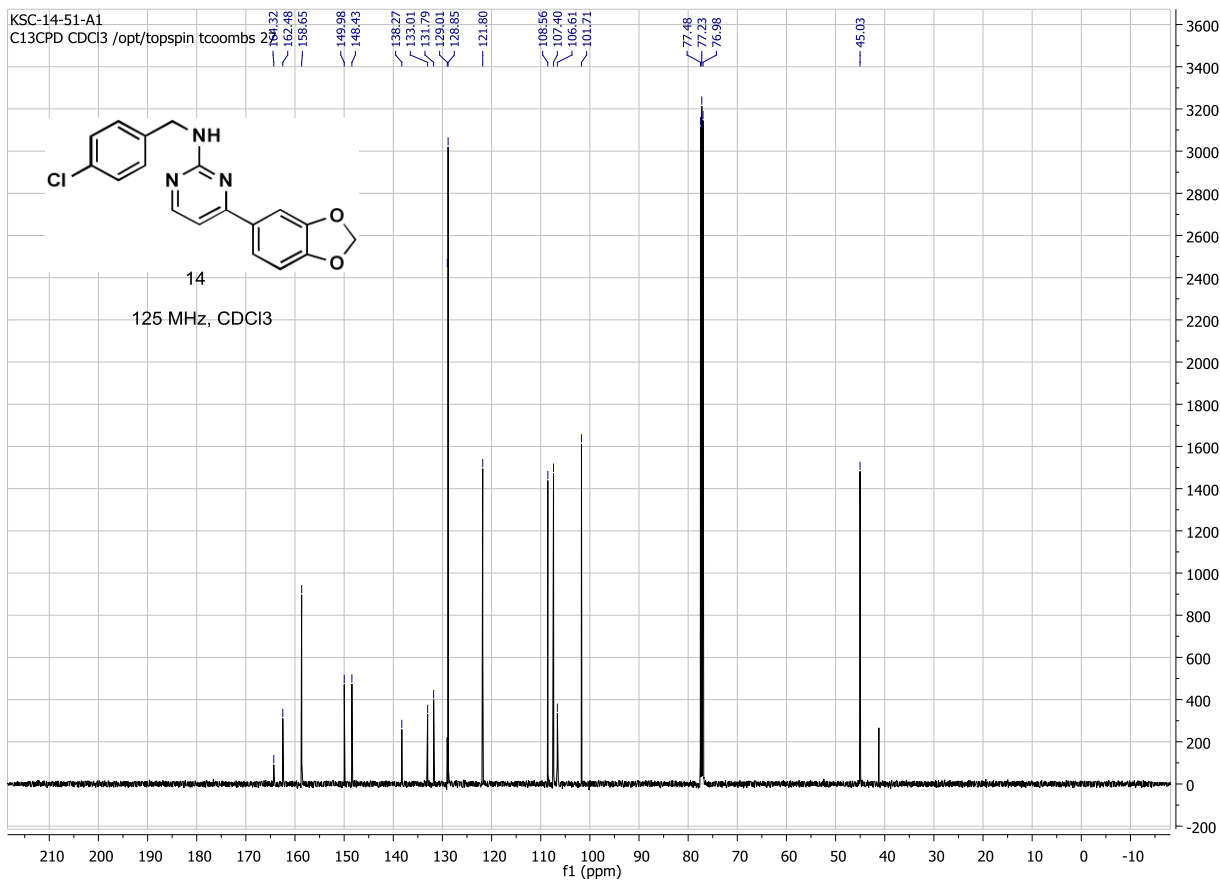

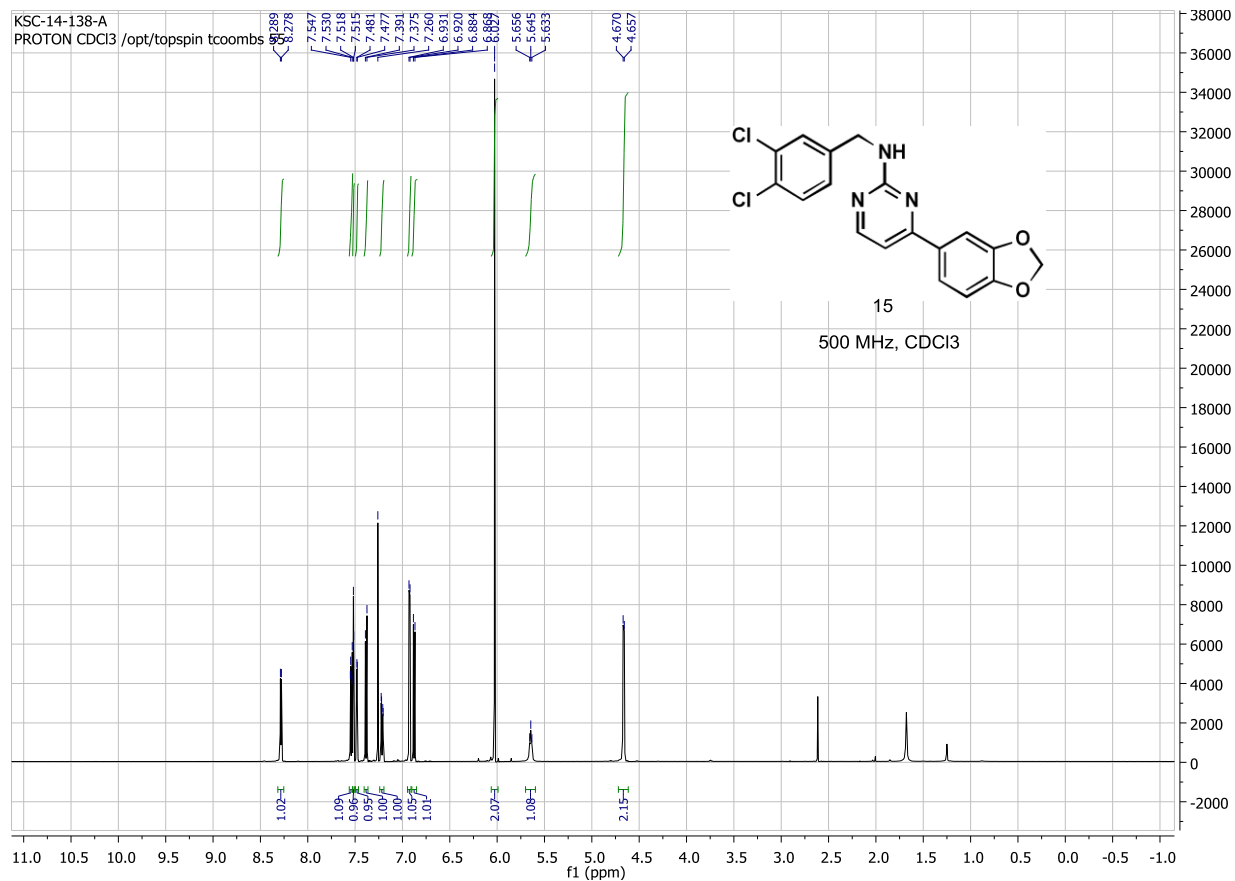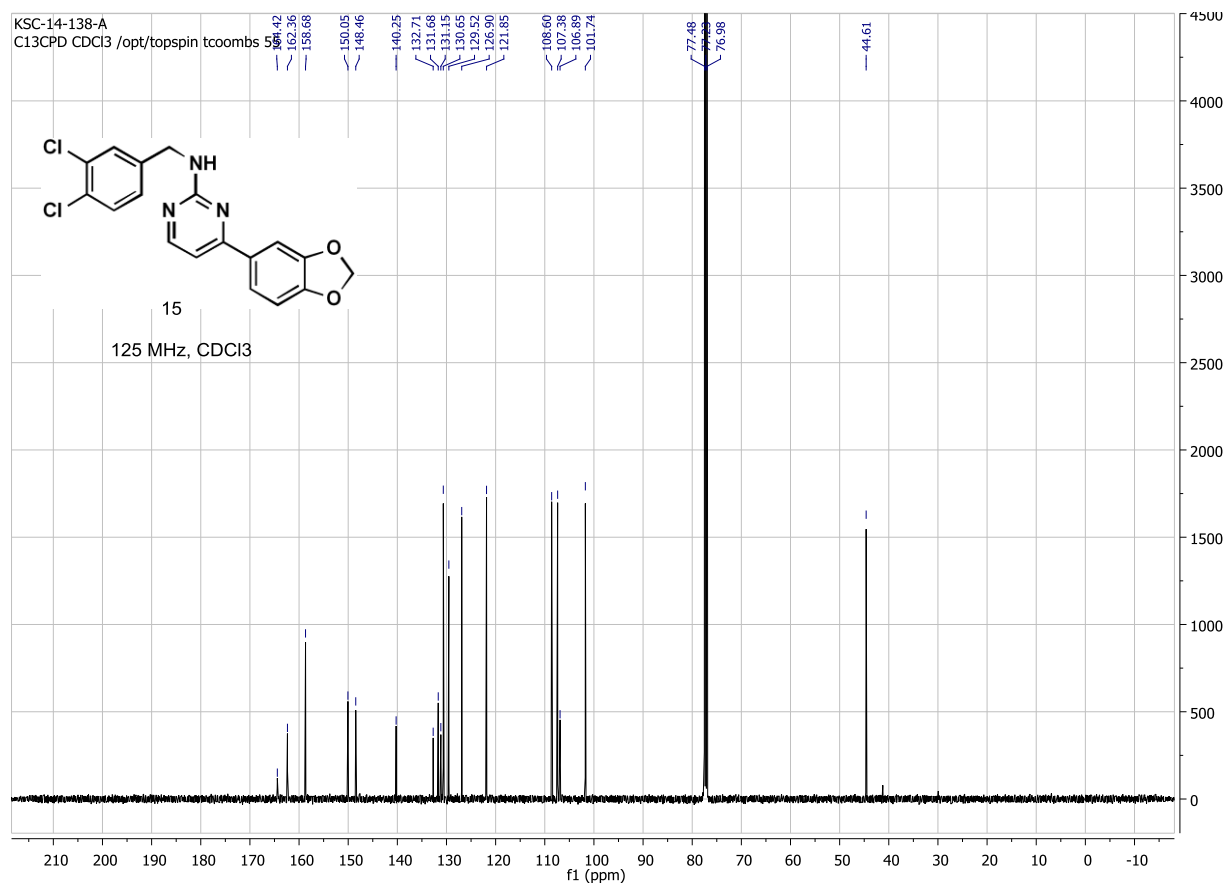

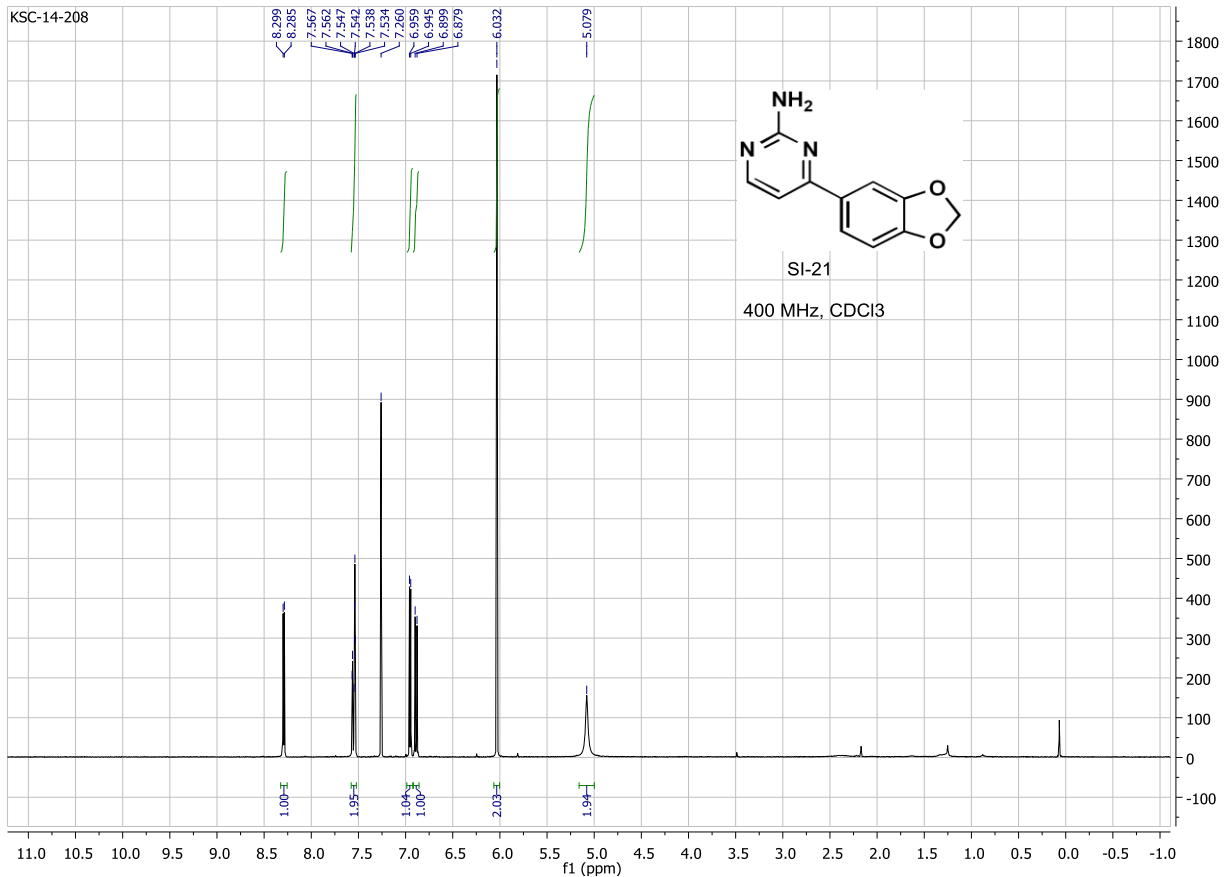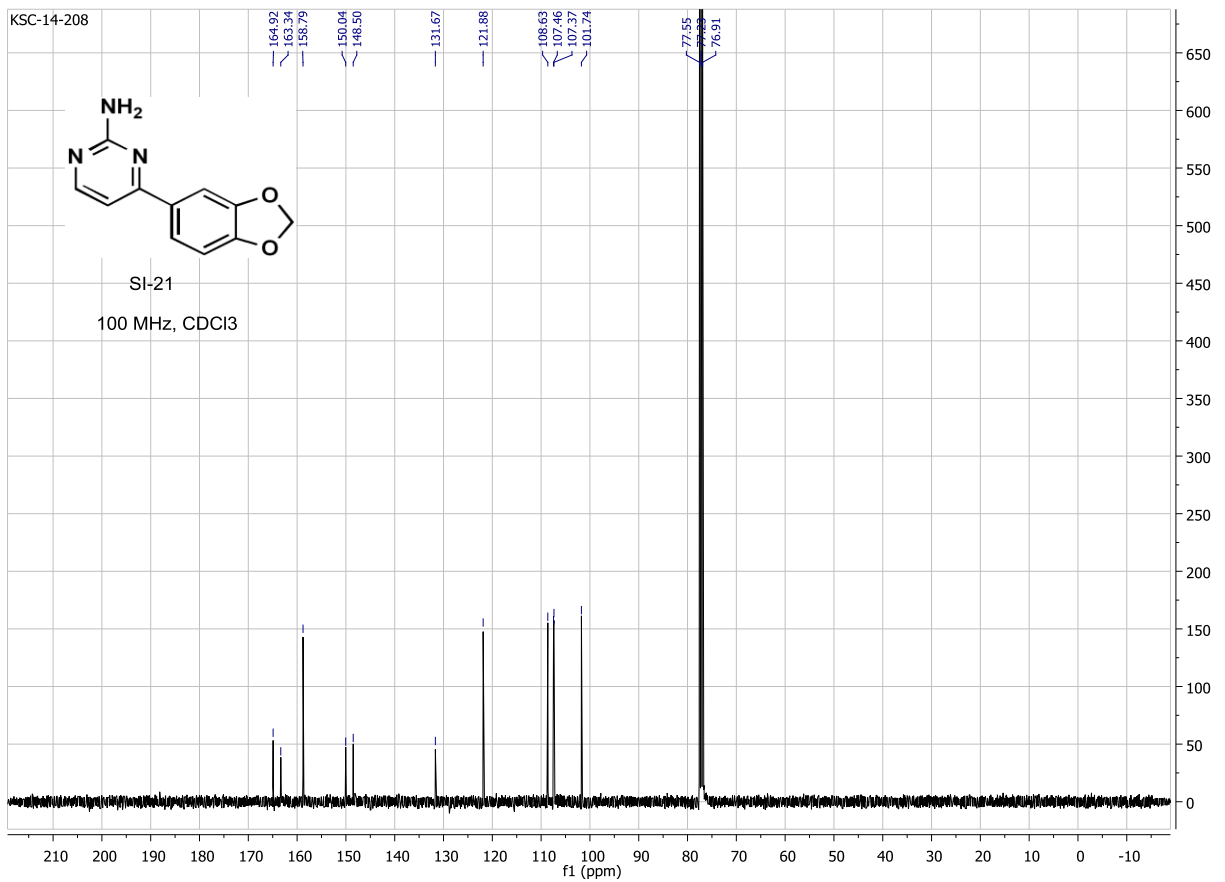

SI-B-76

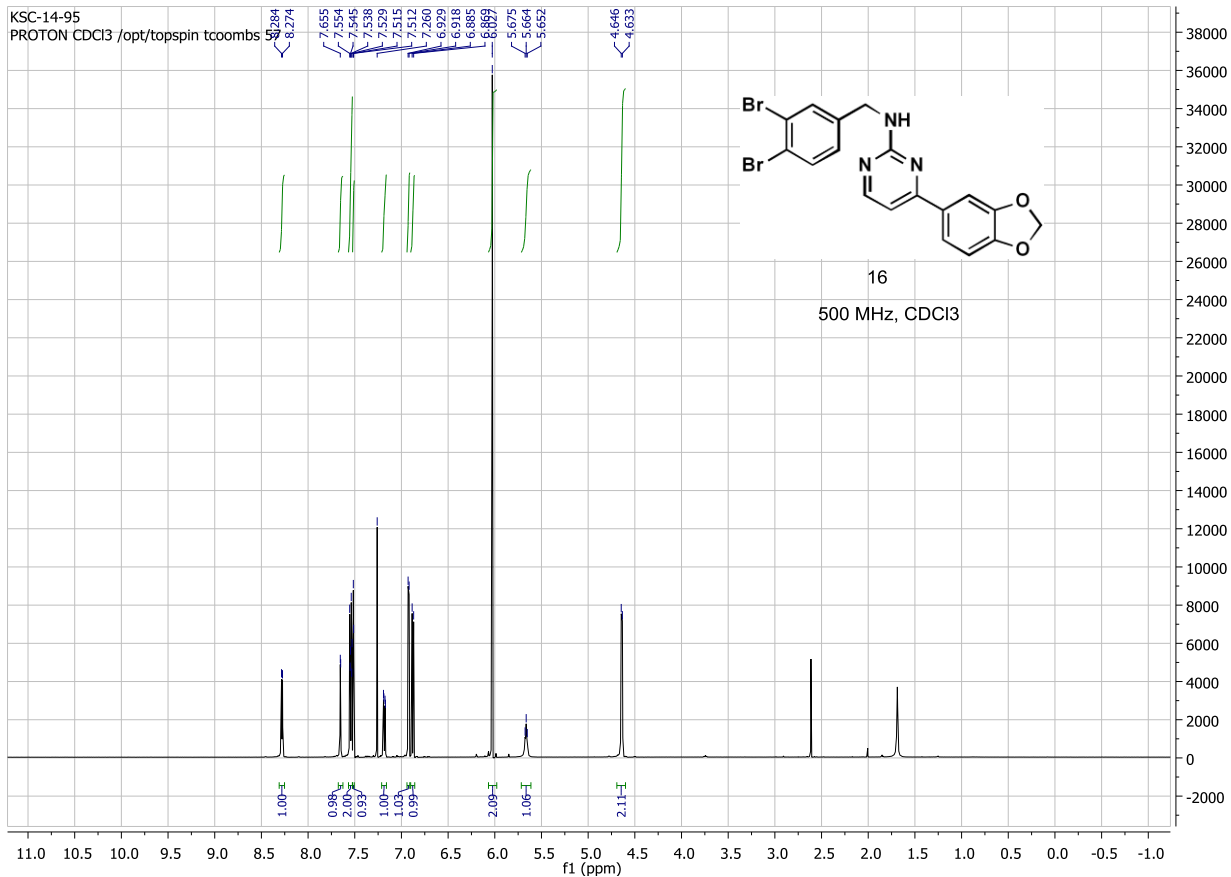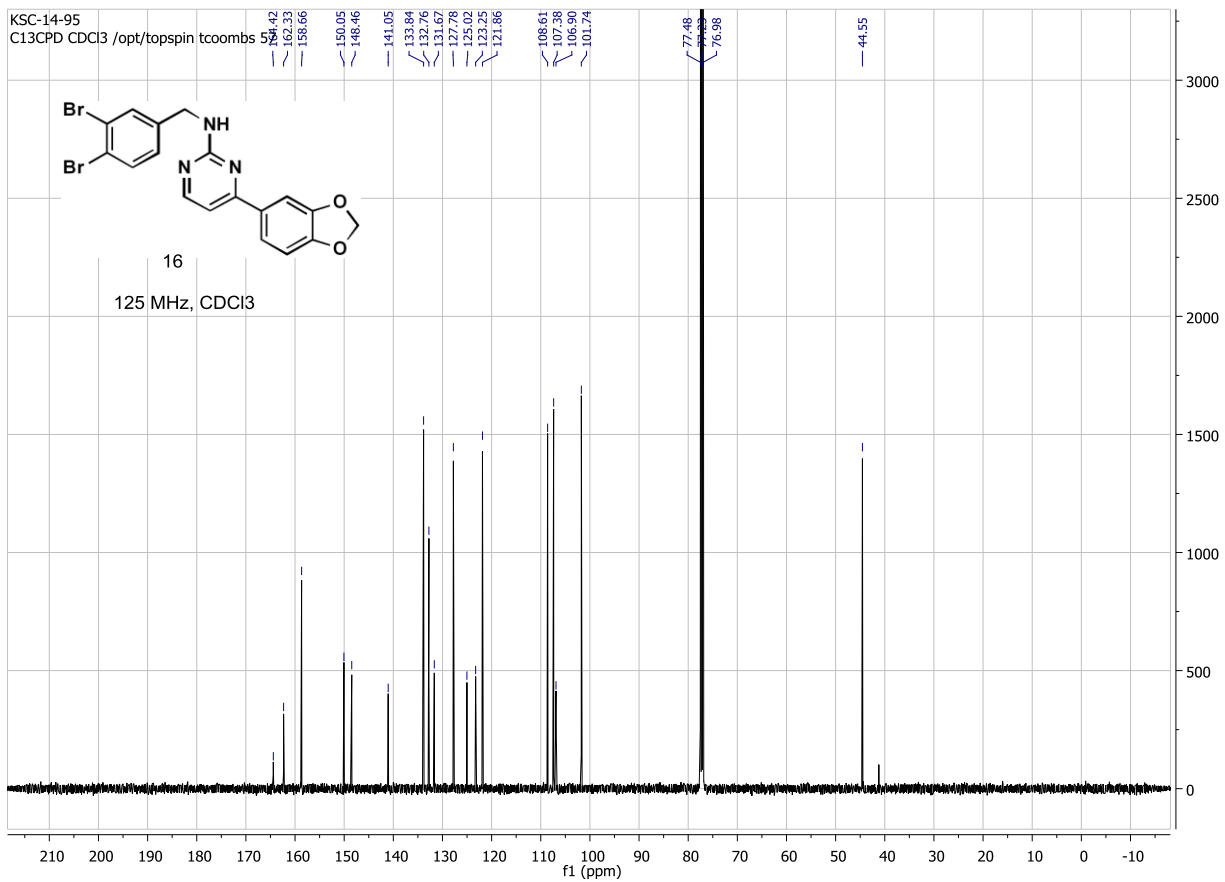

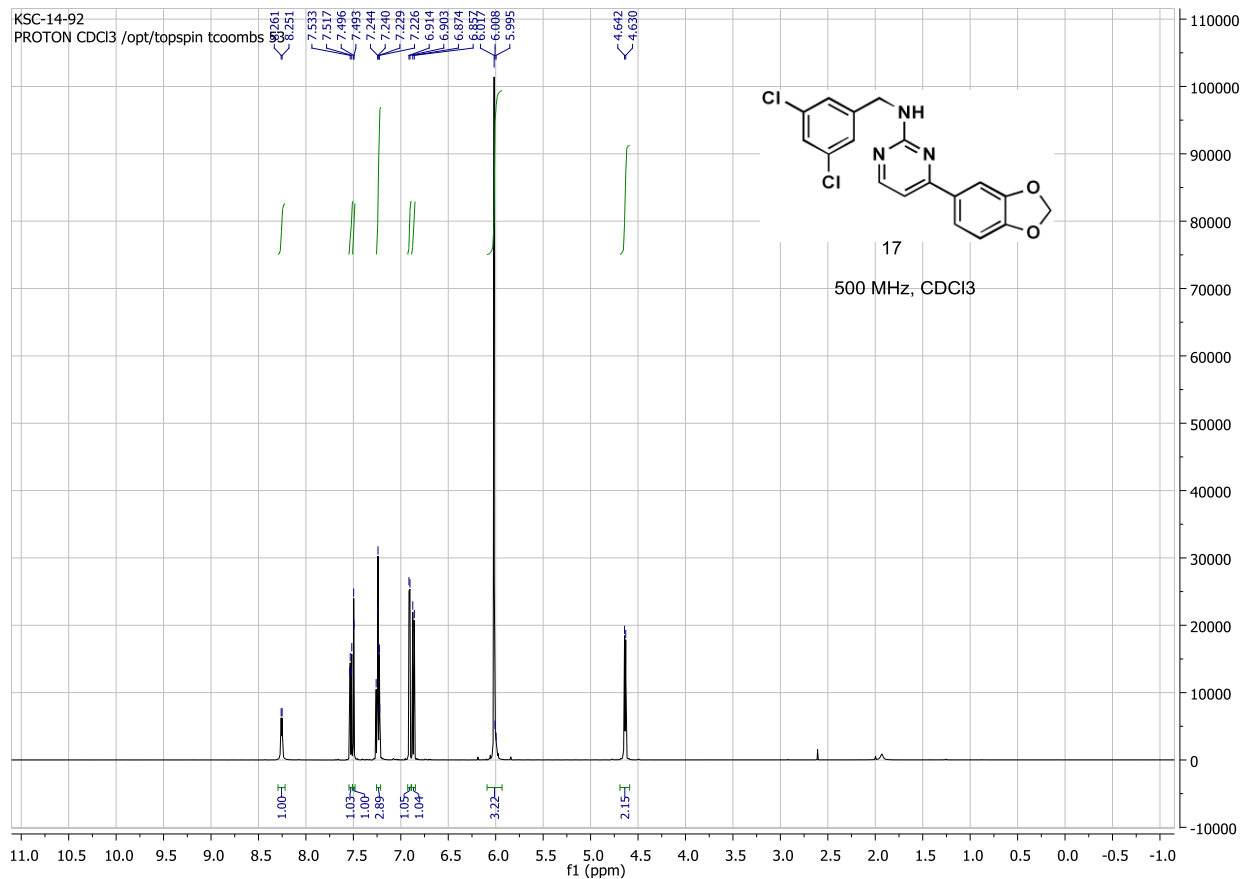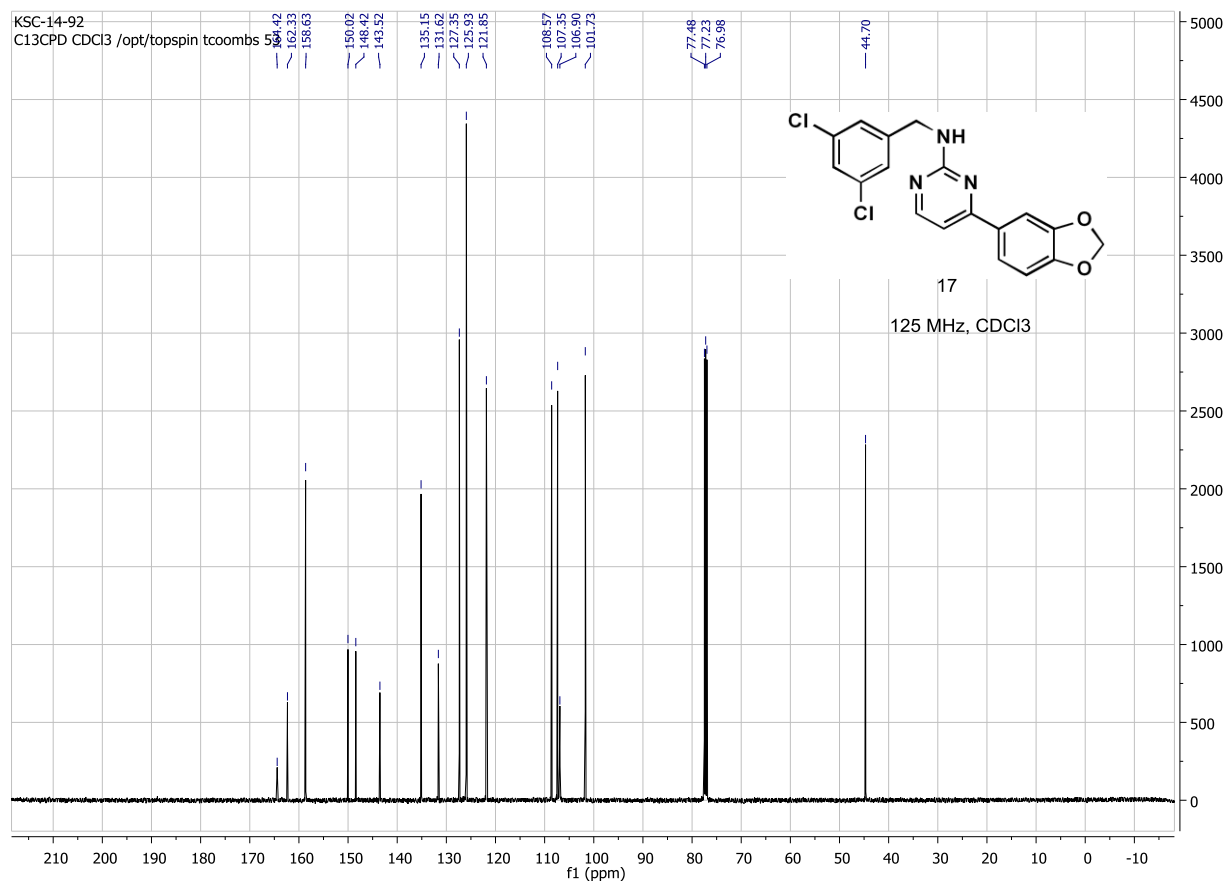

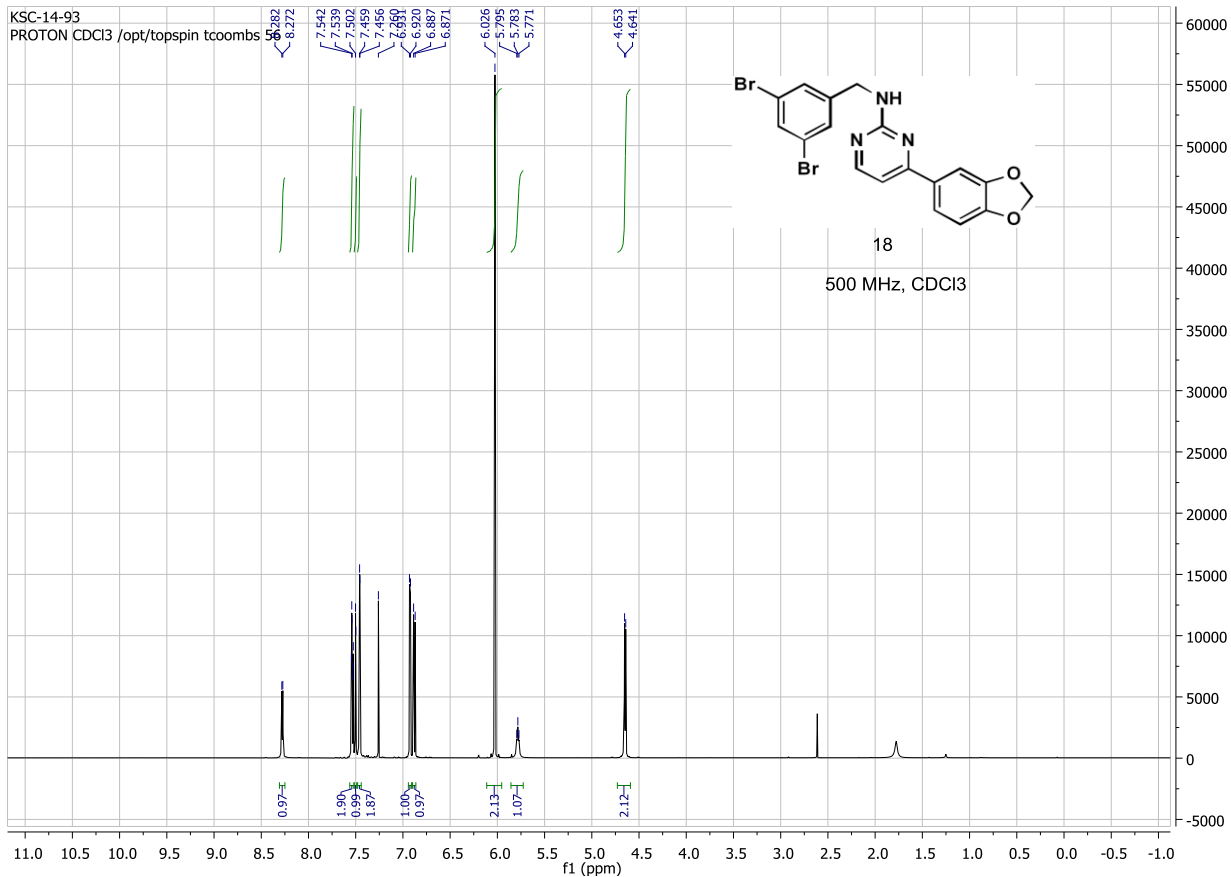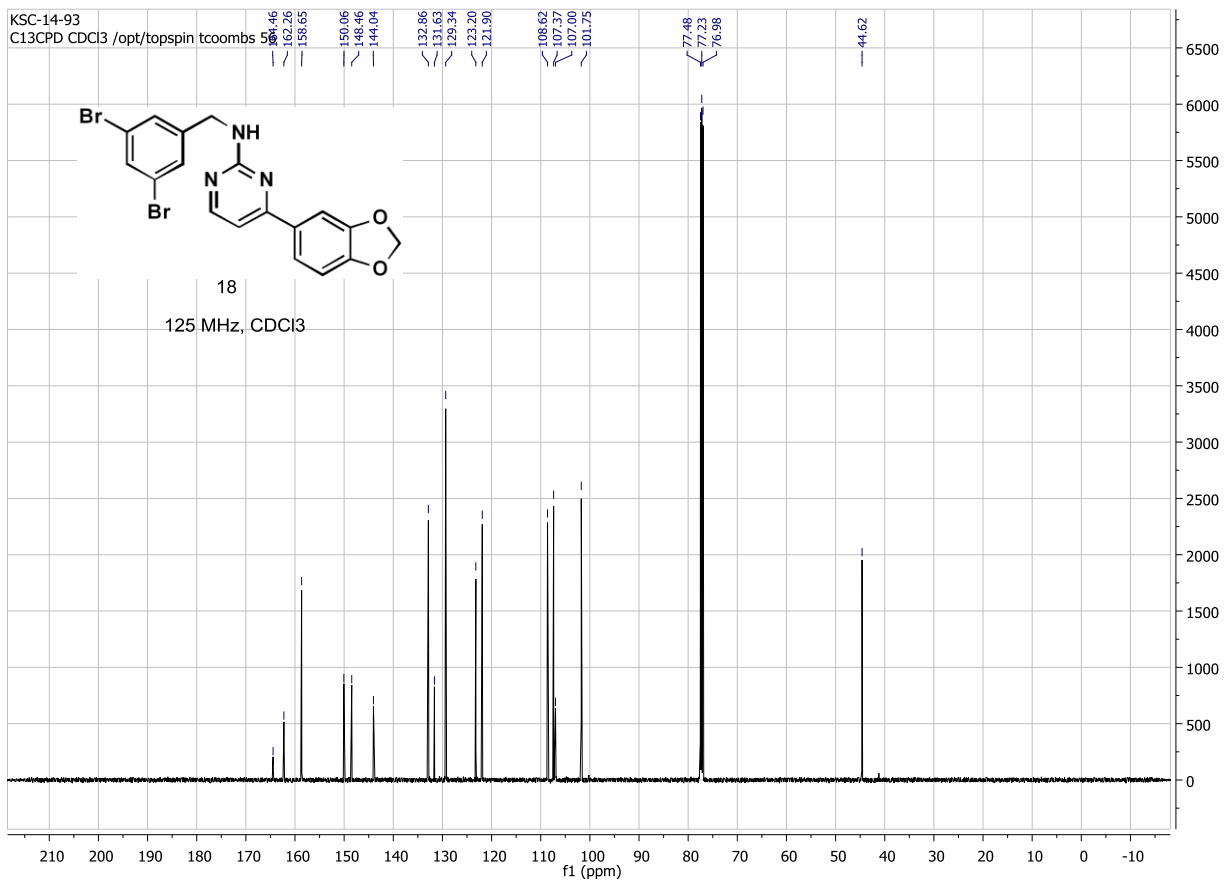

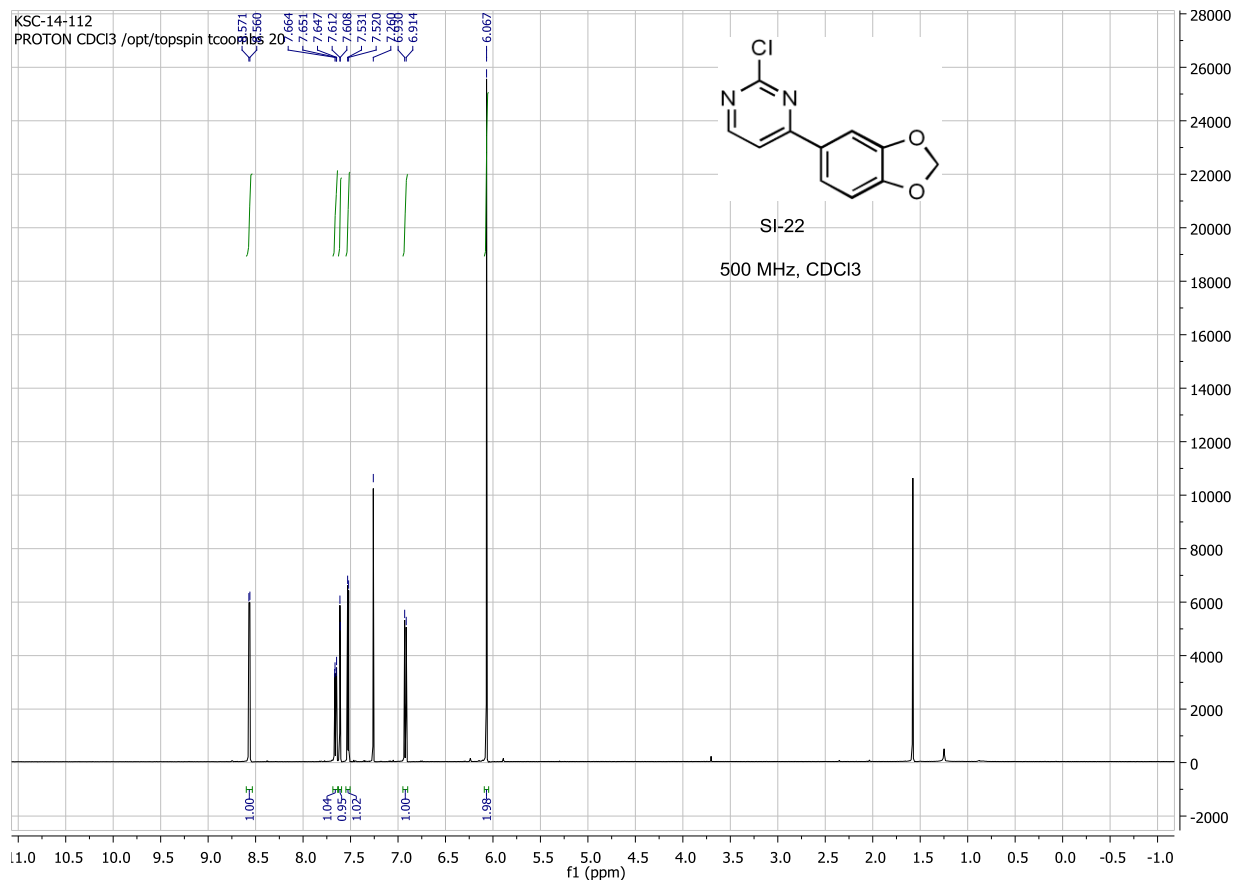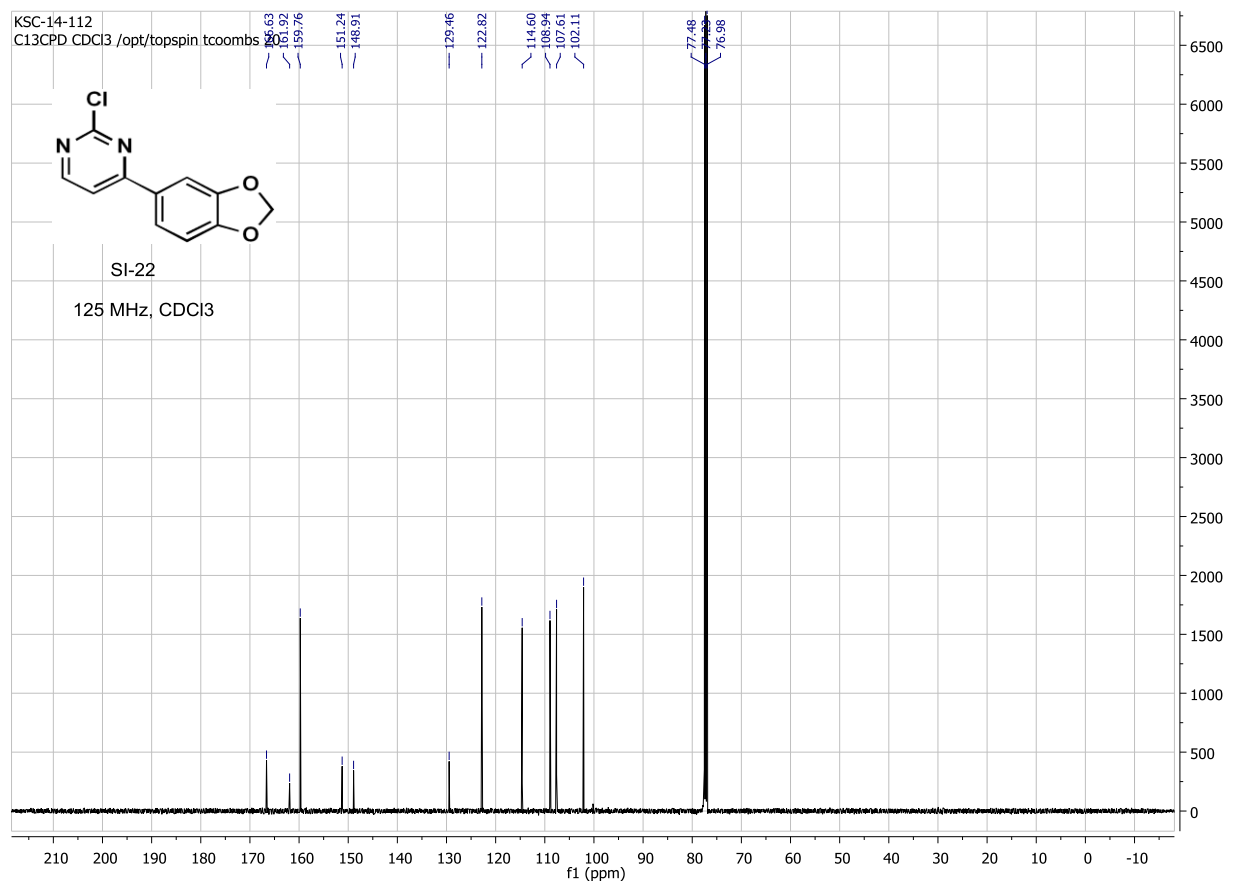



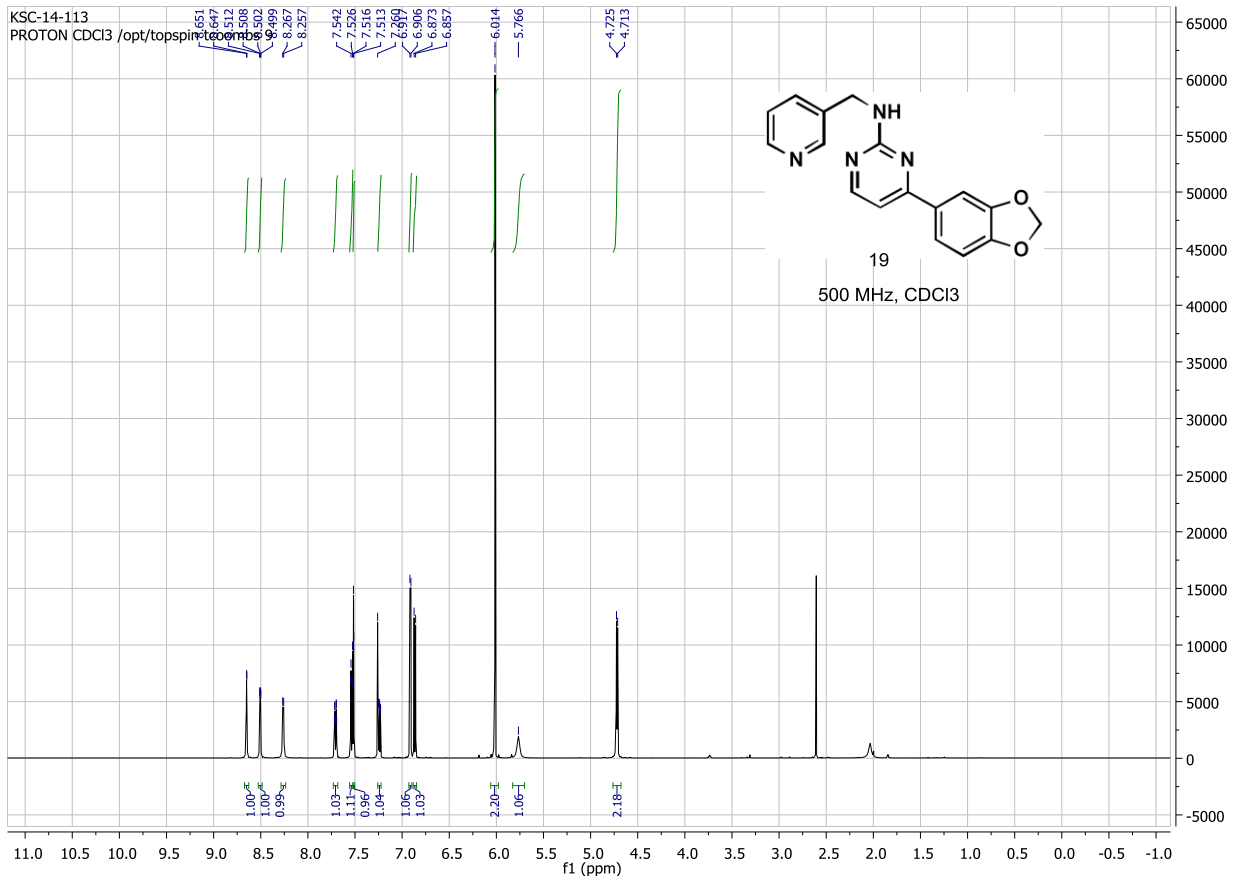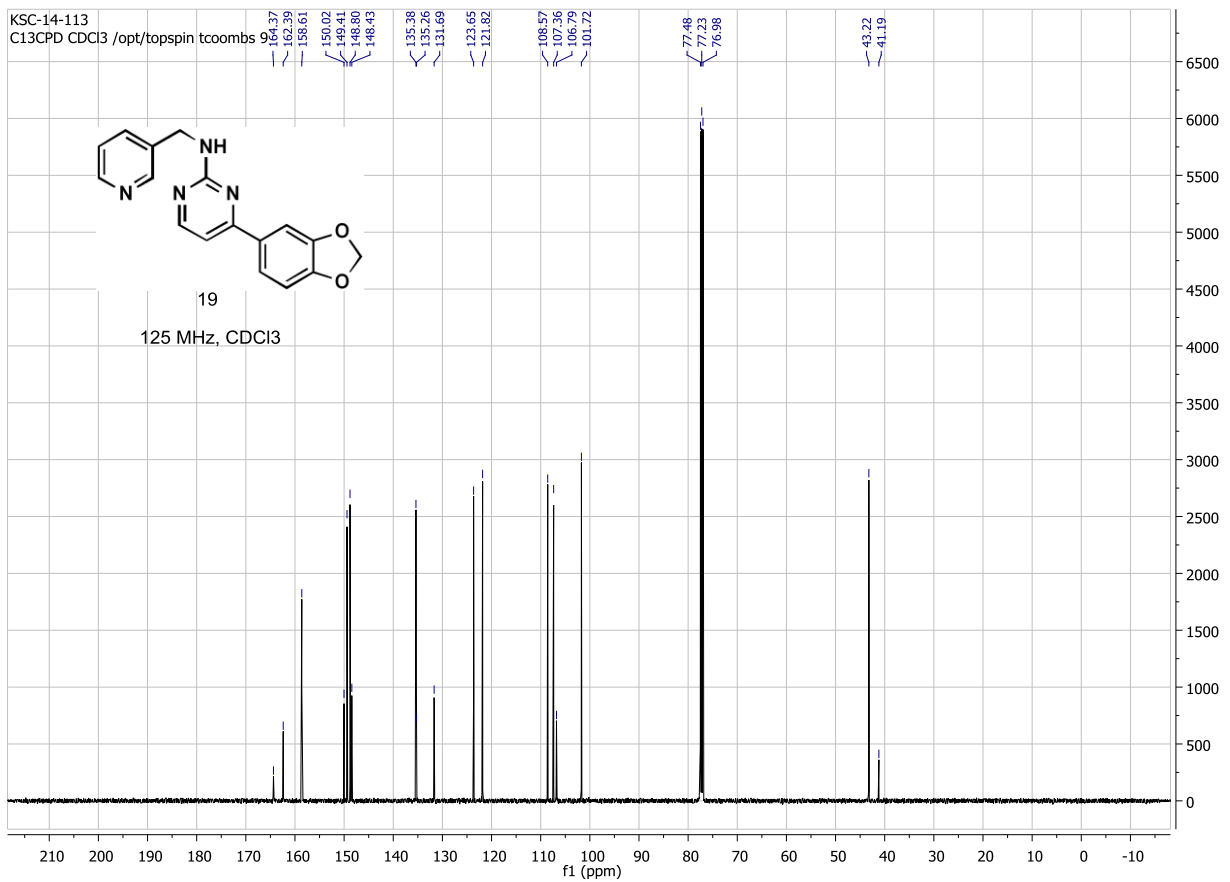

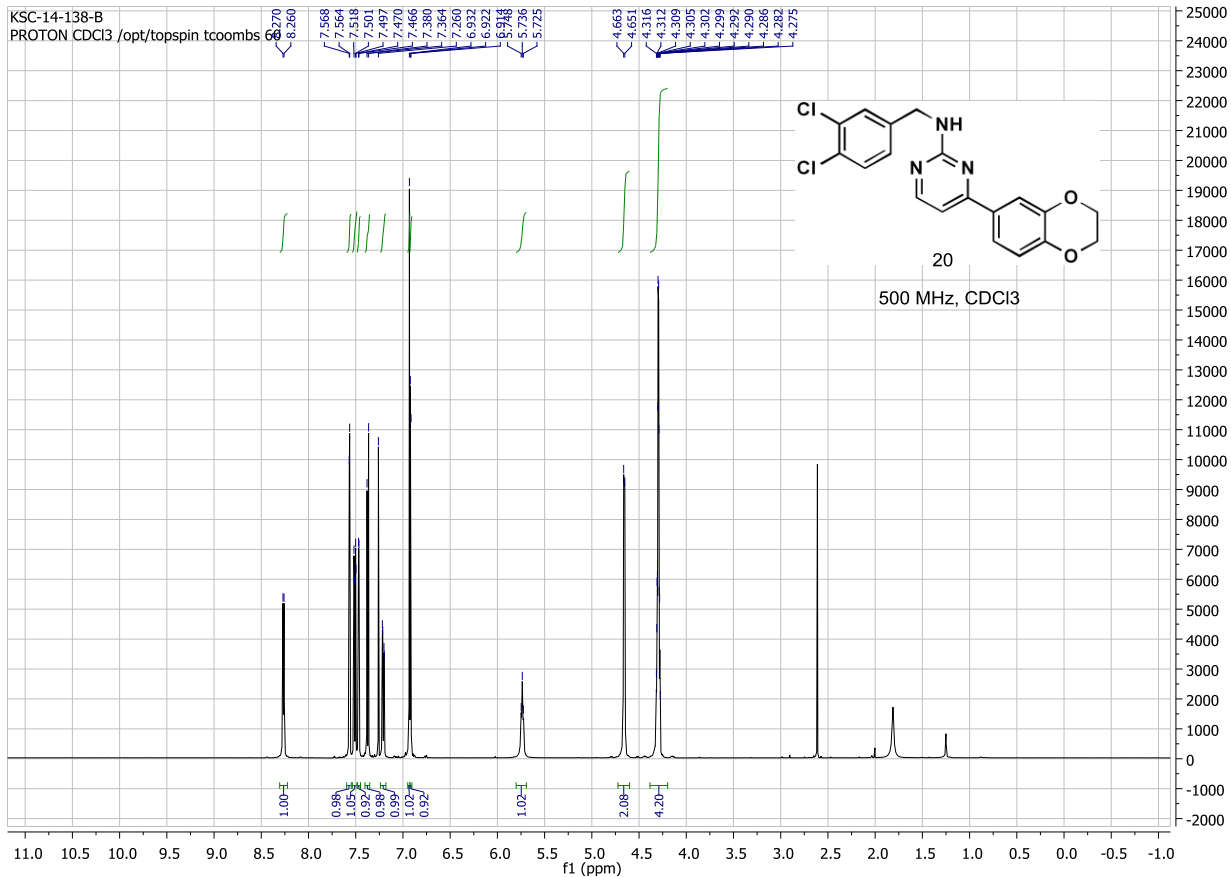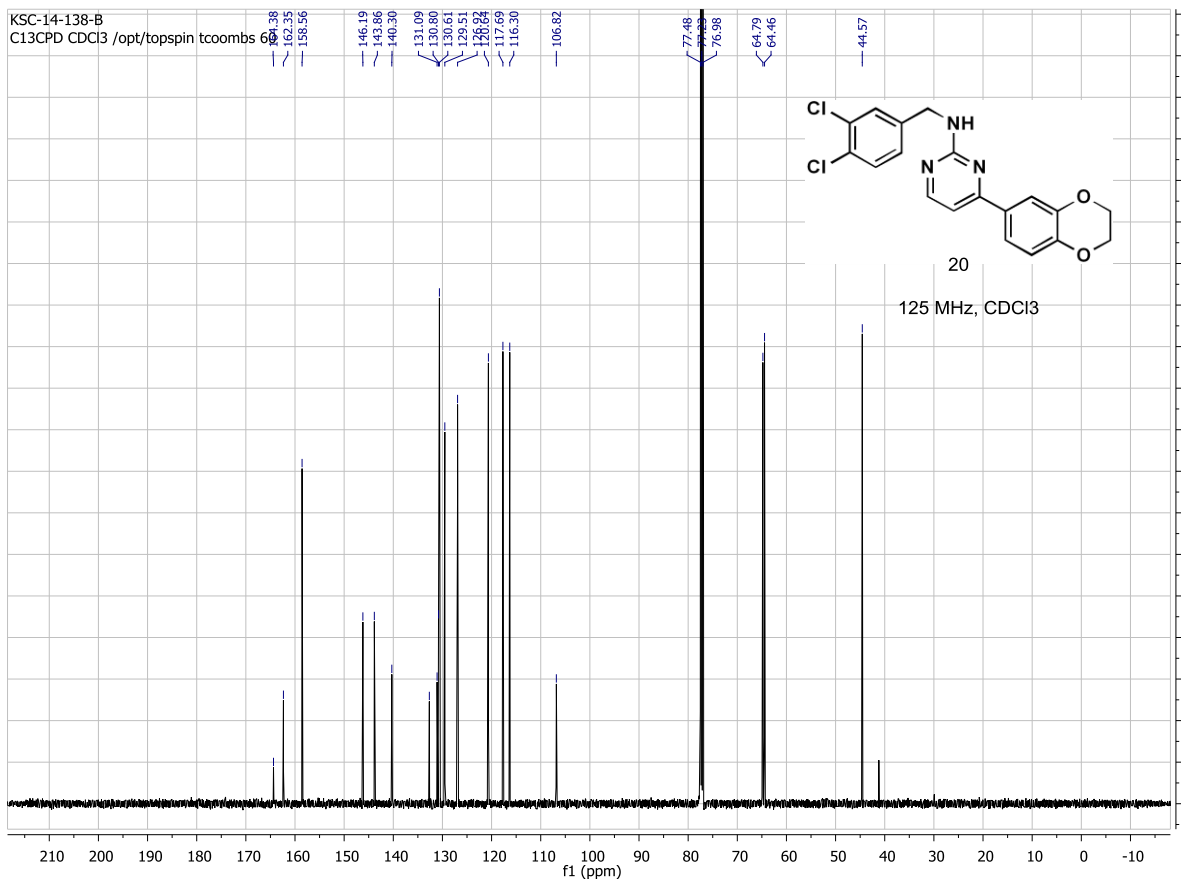

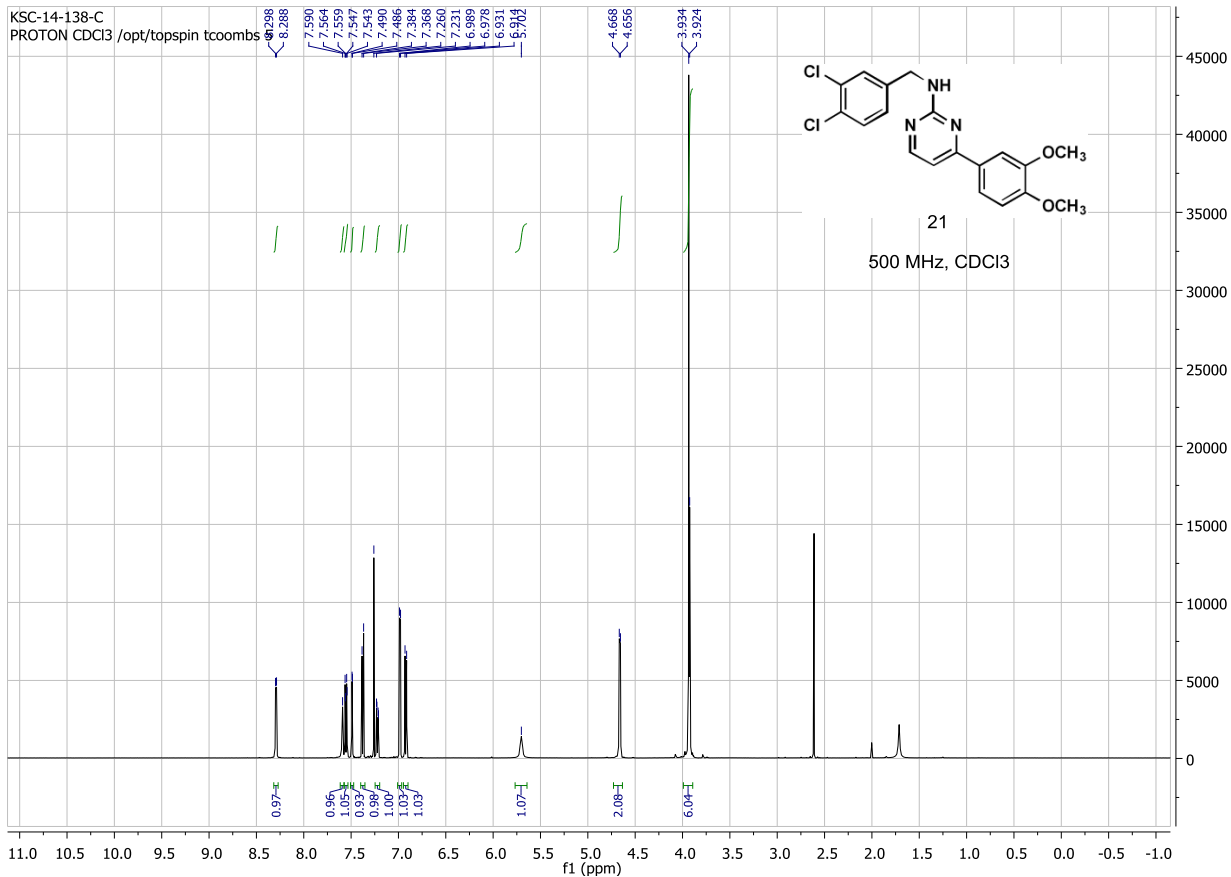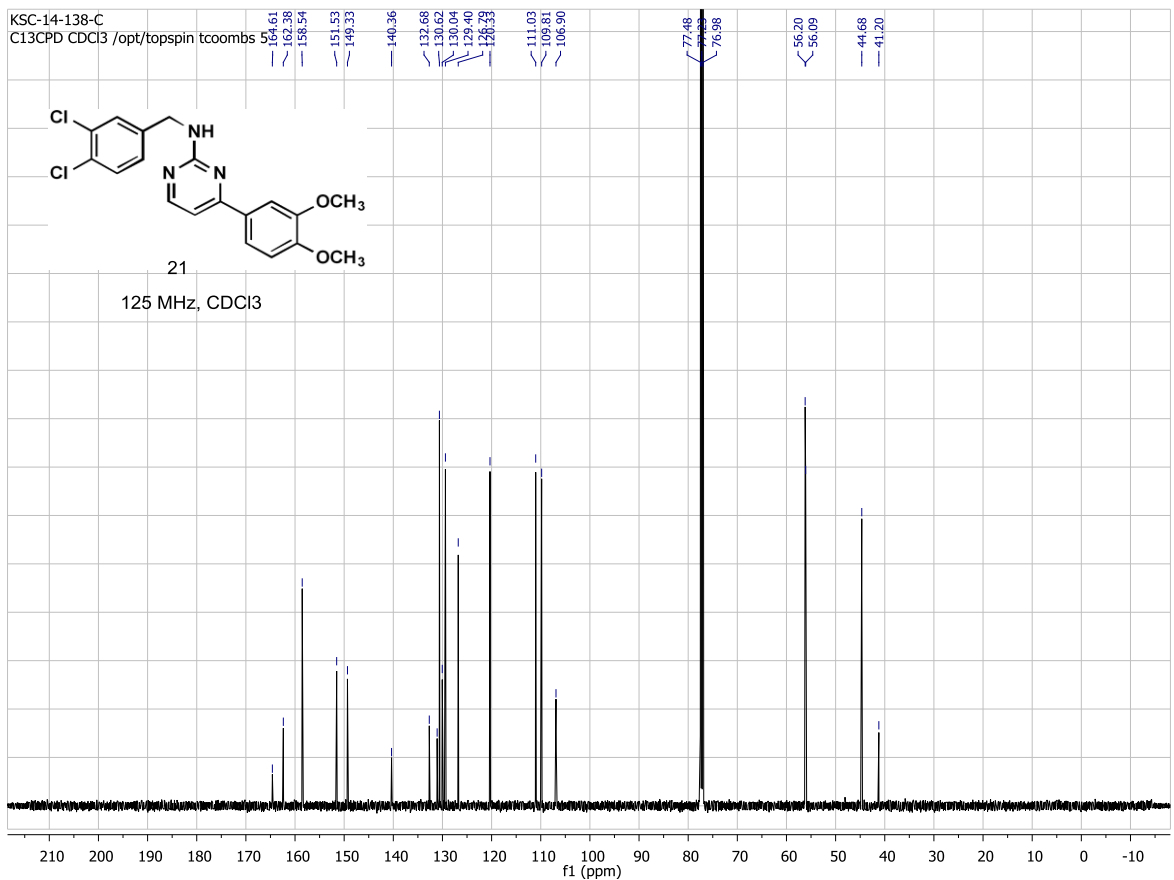

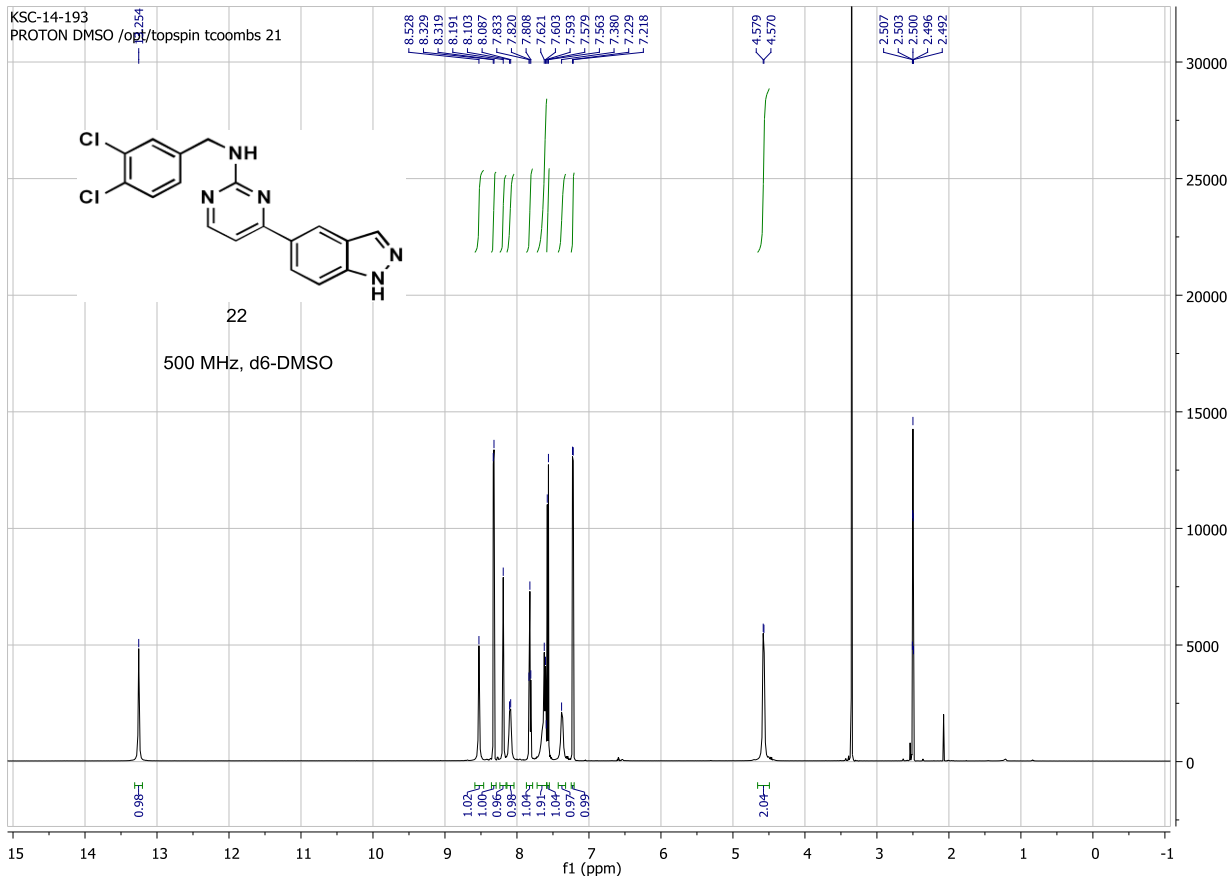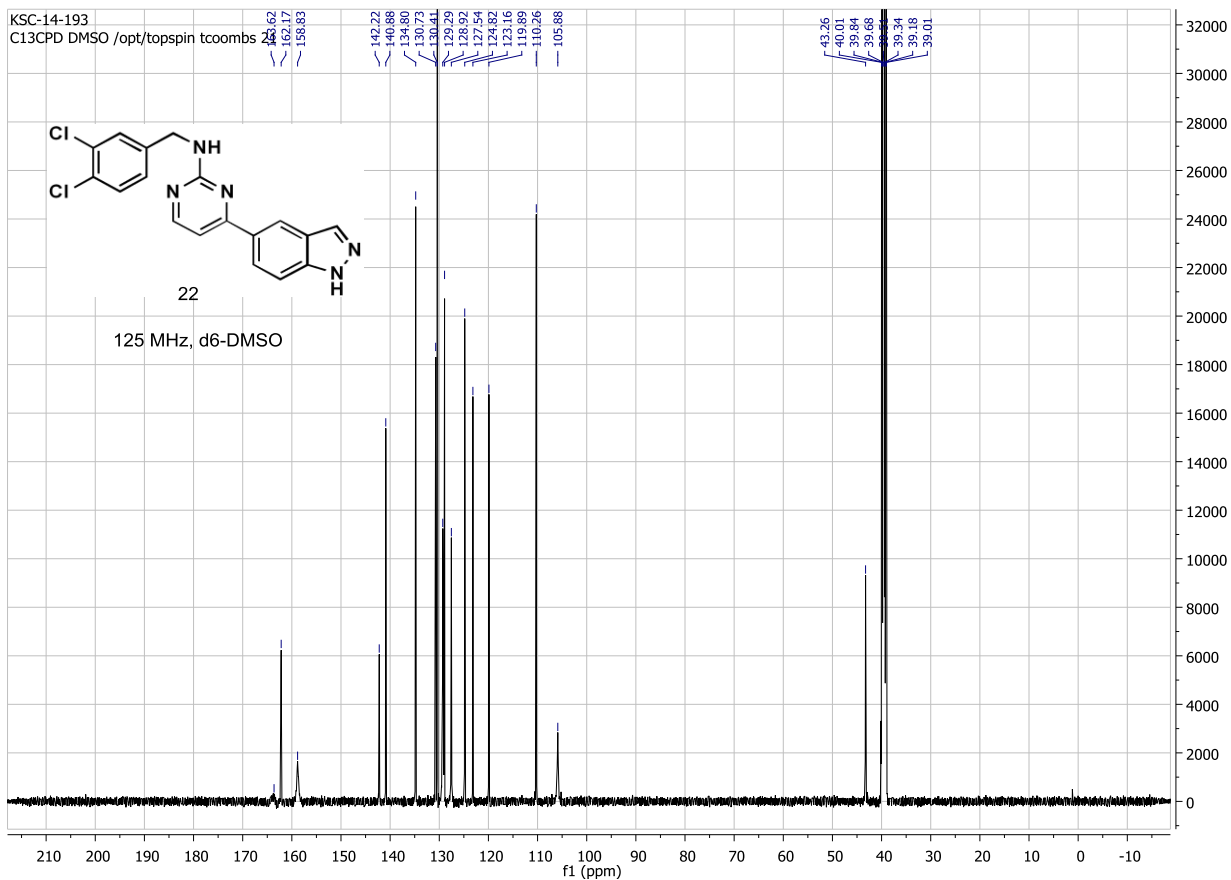

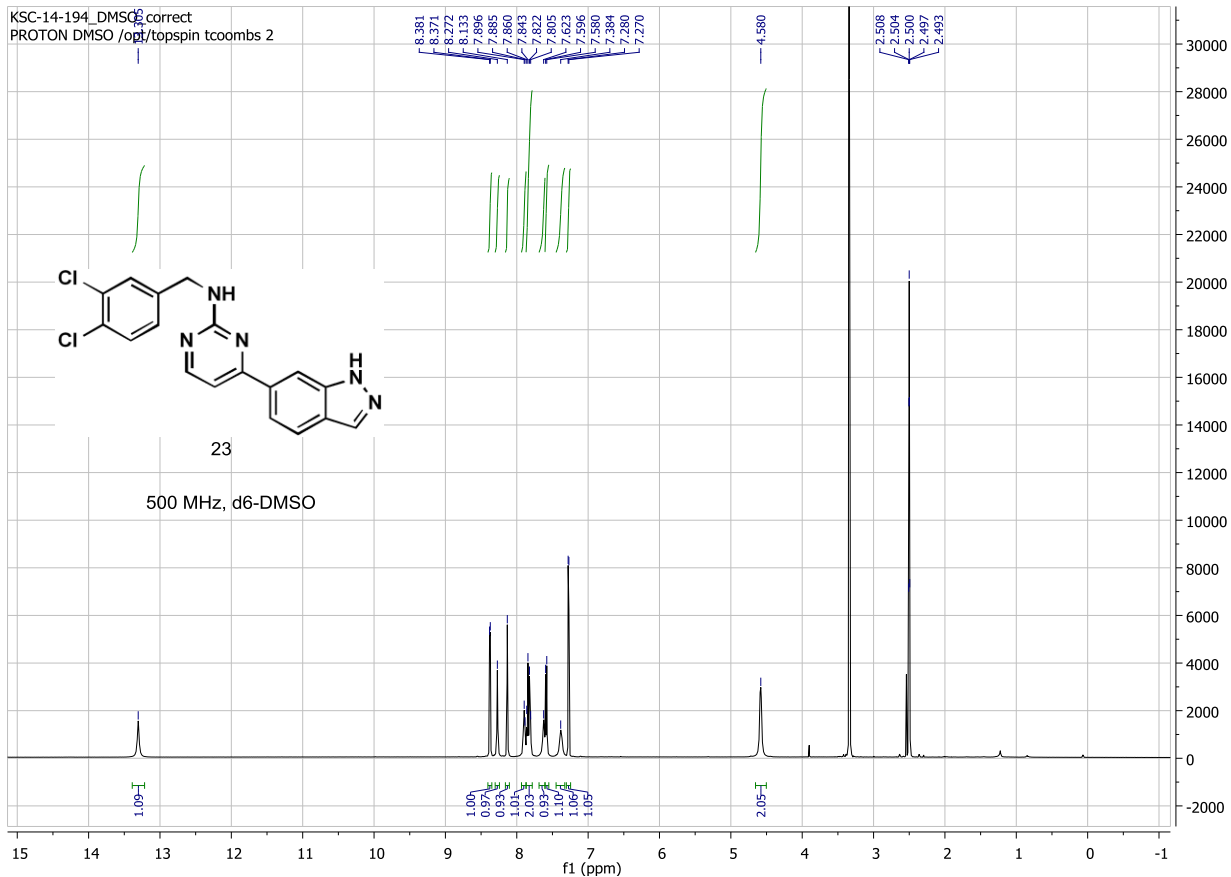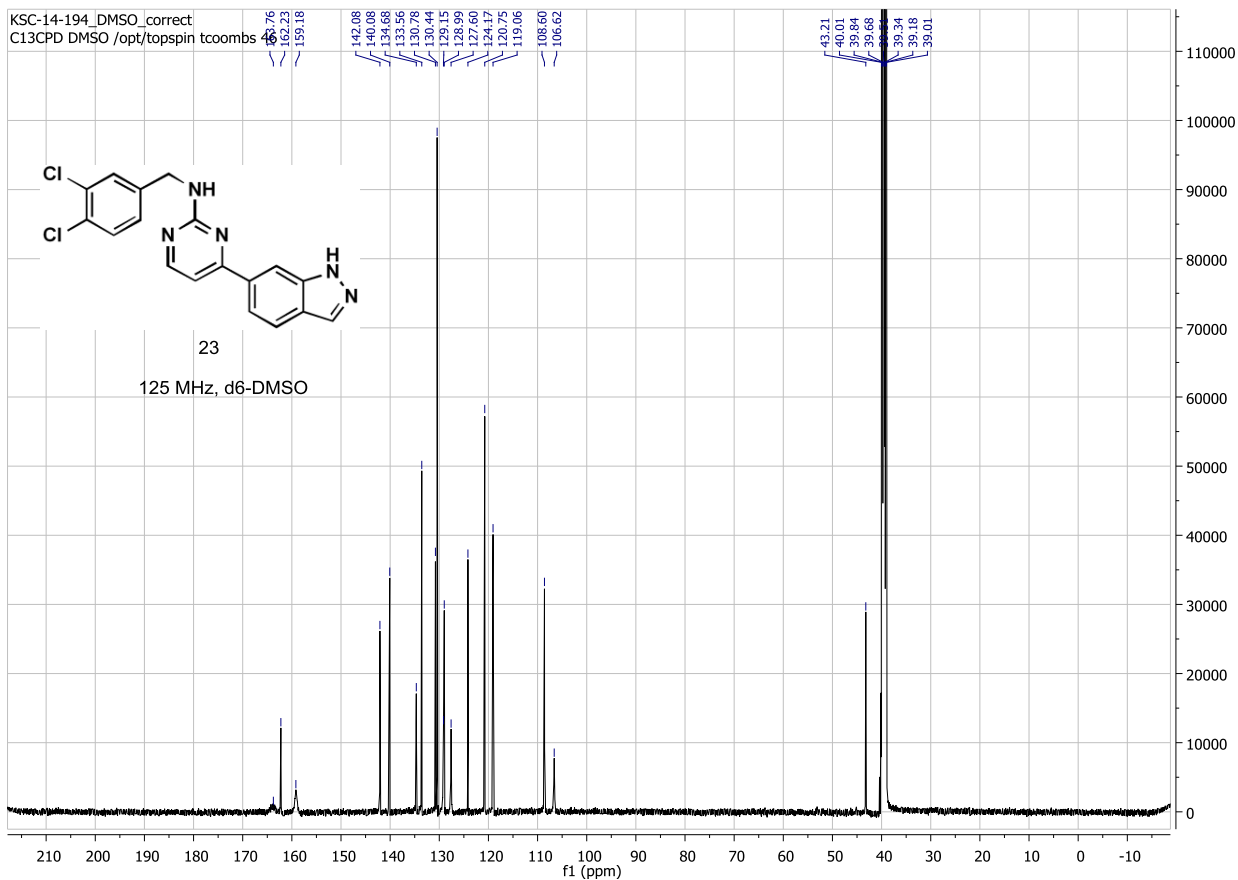

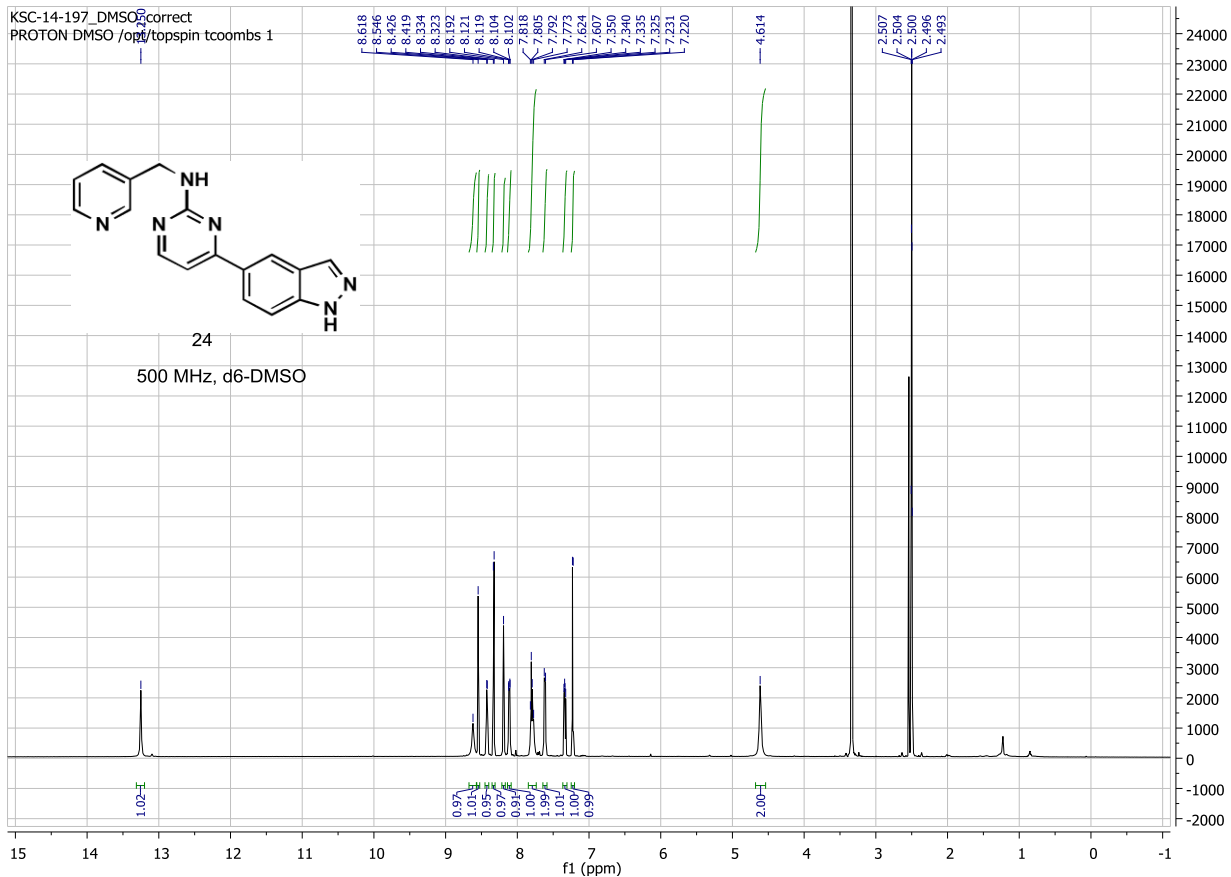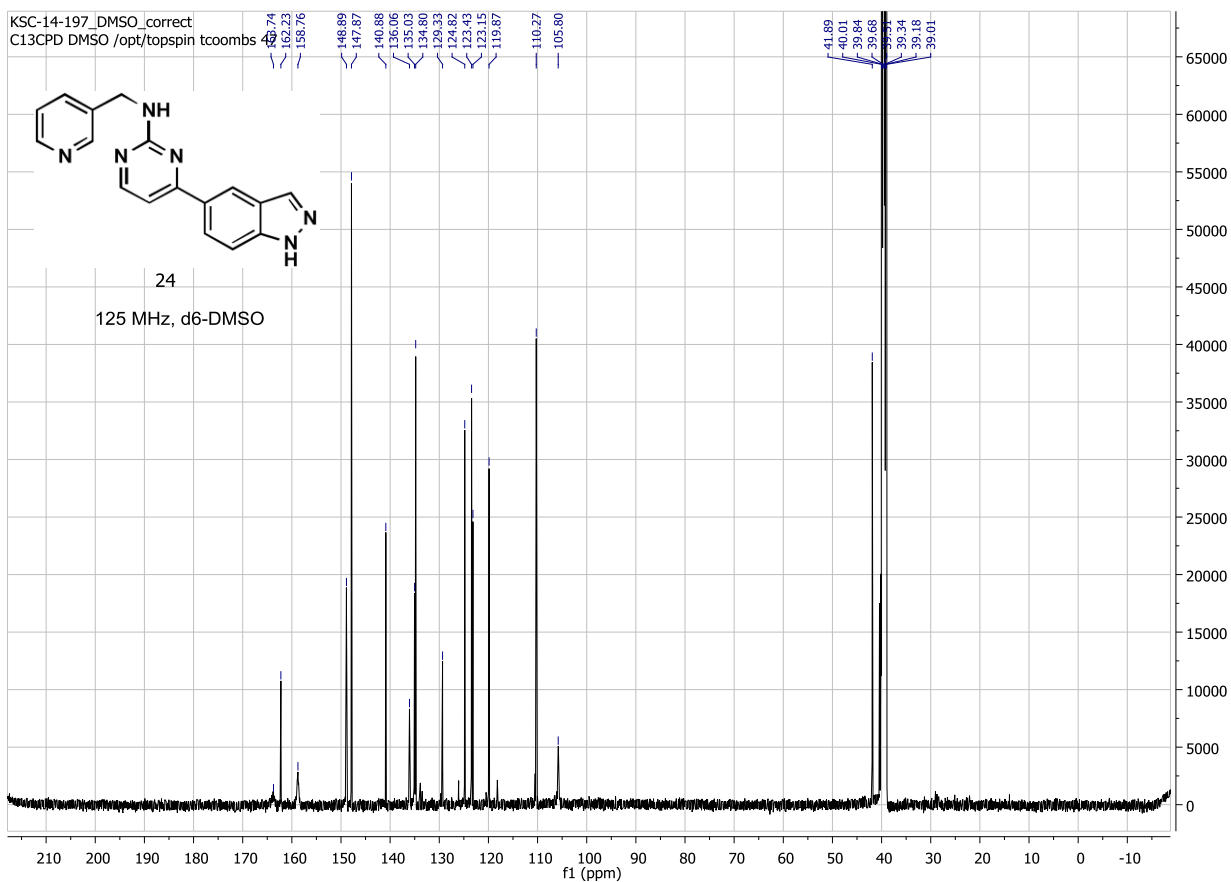

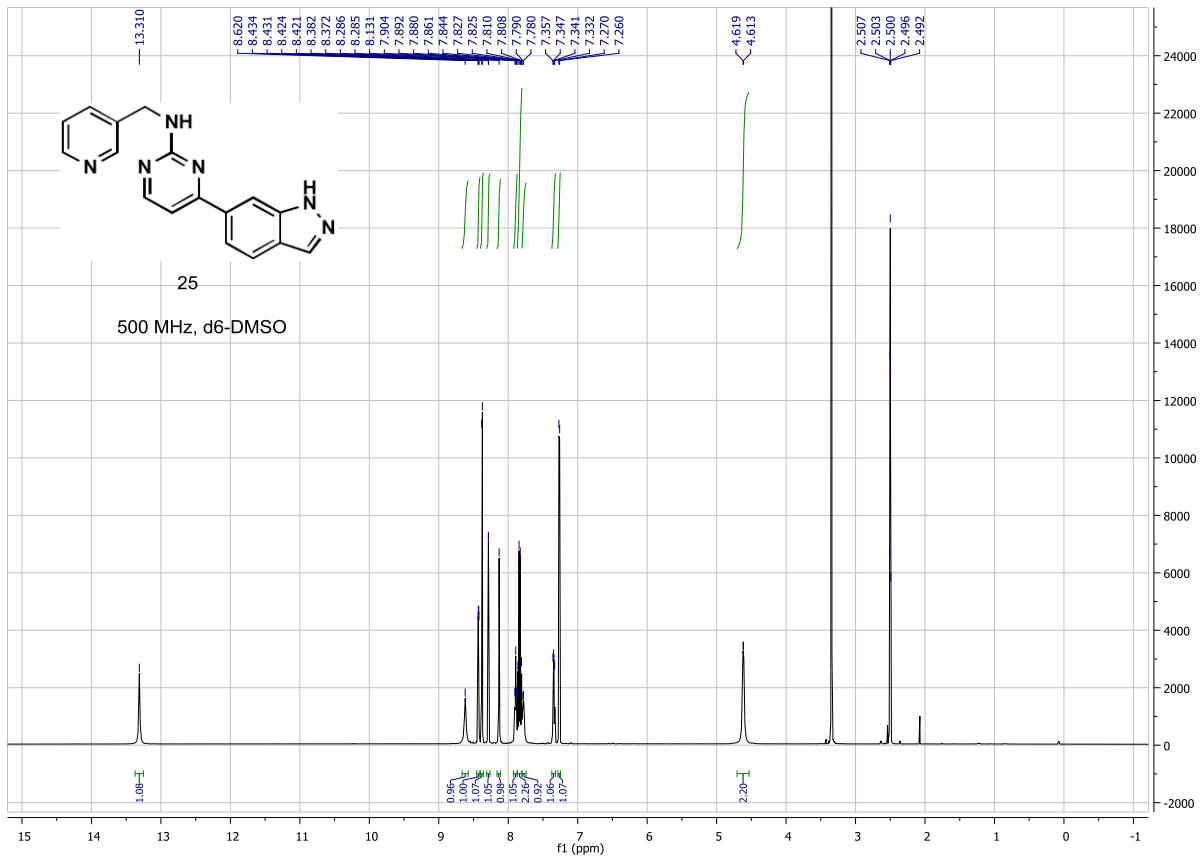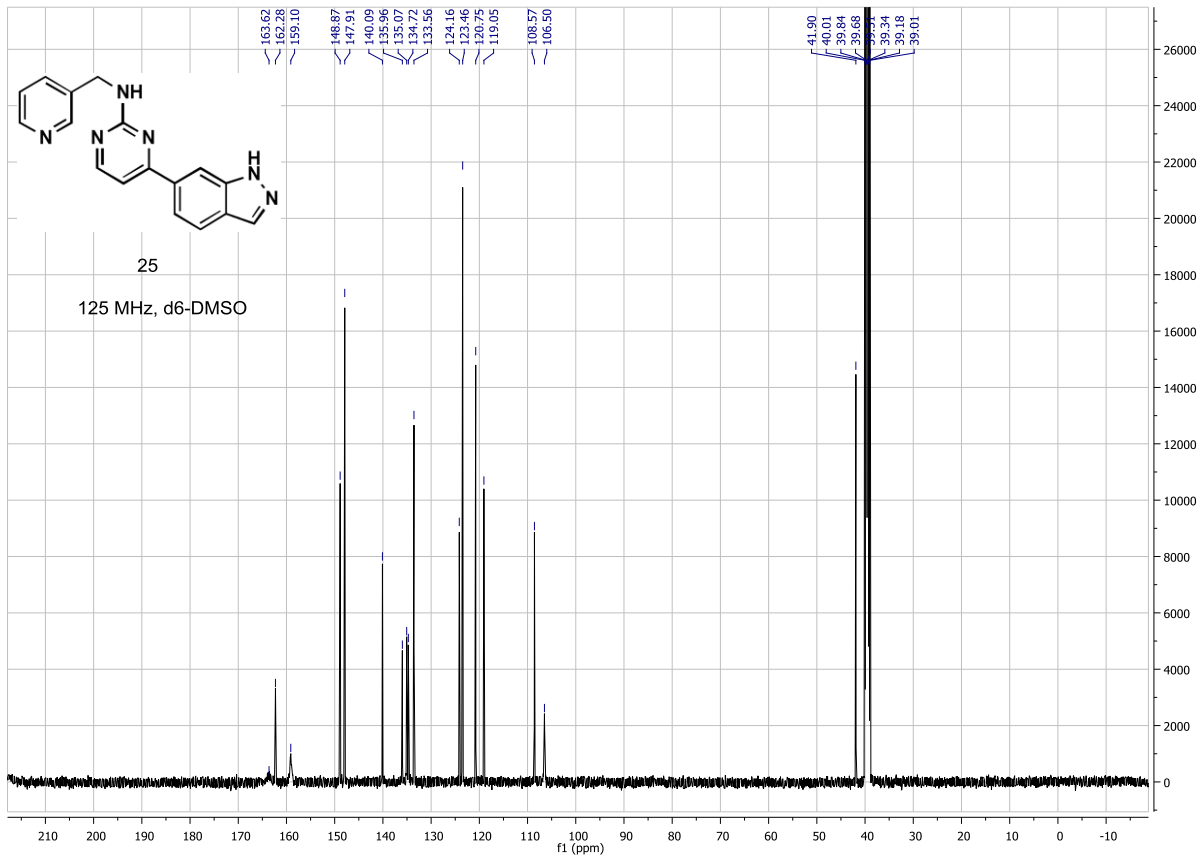

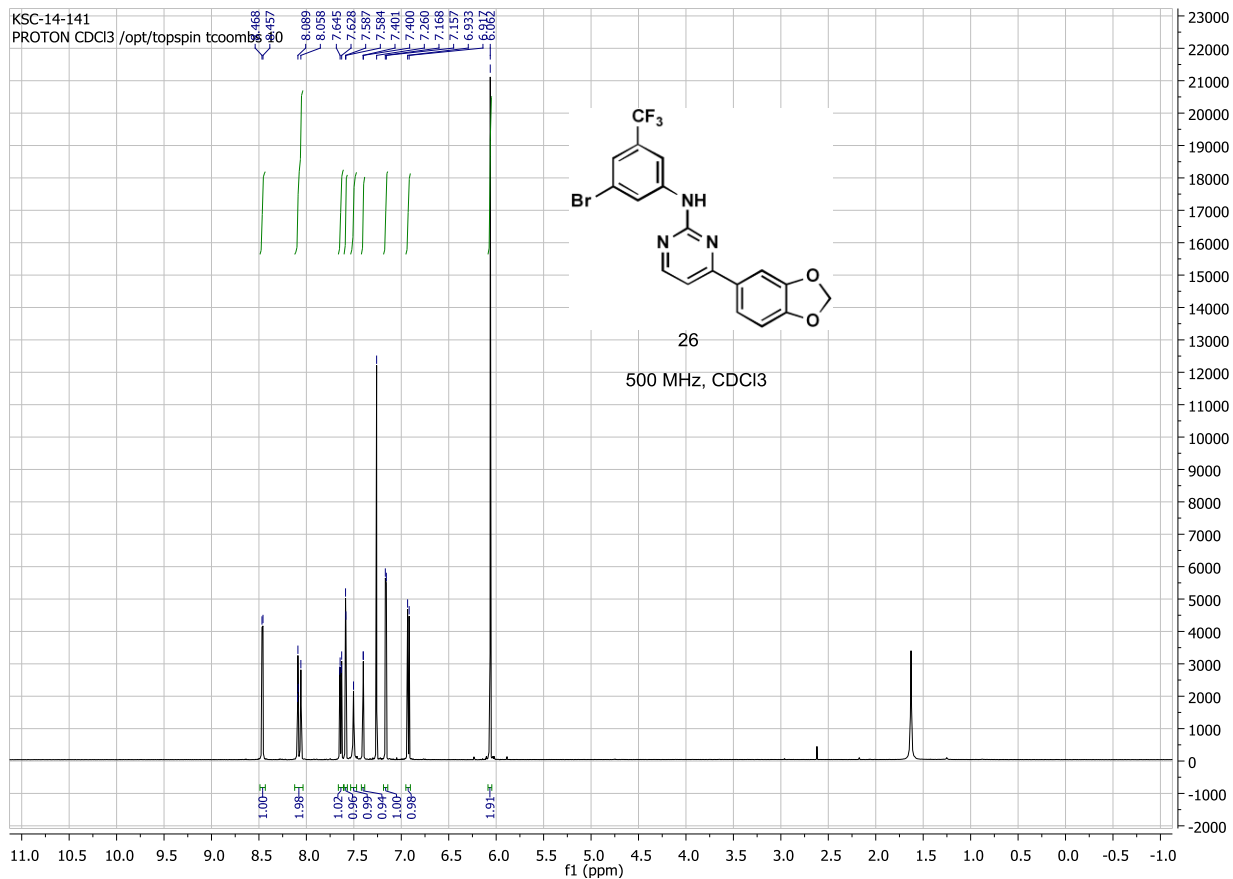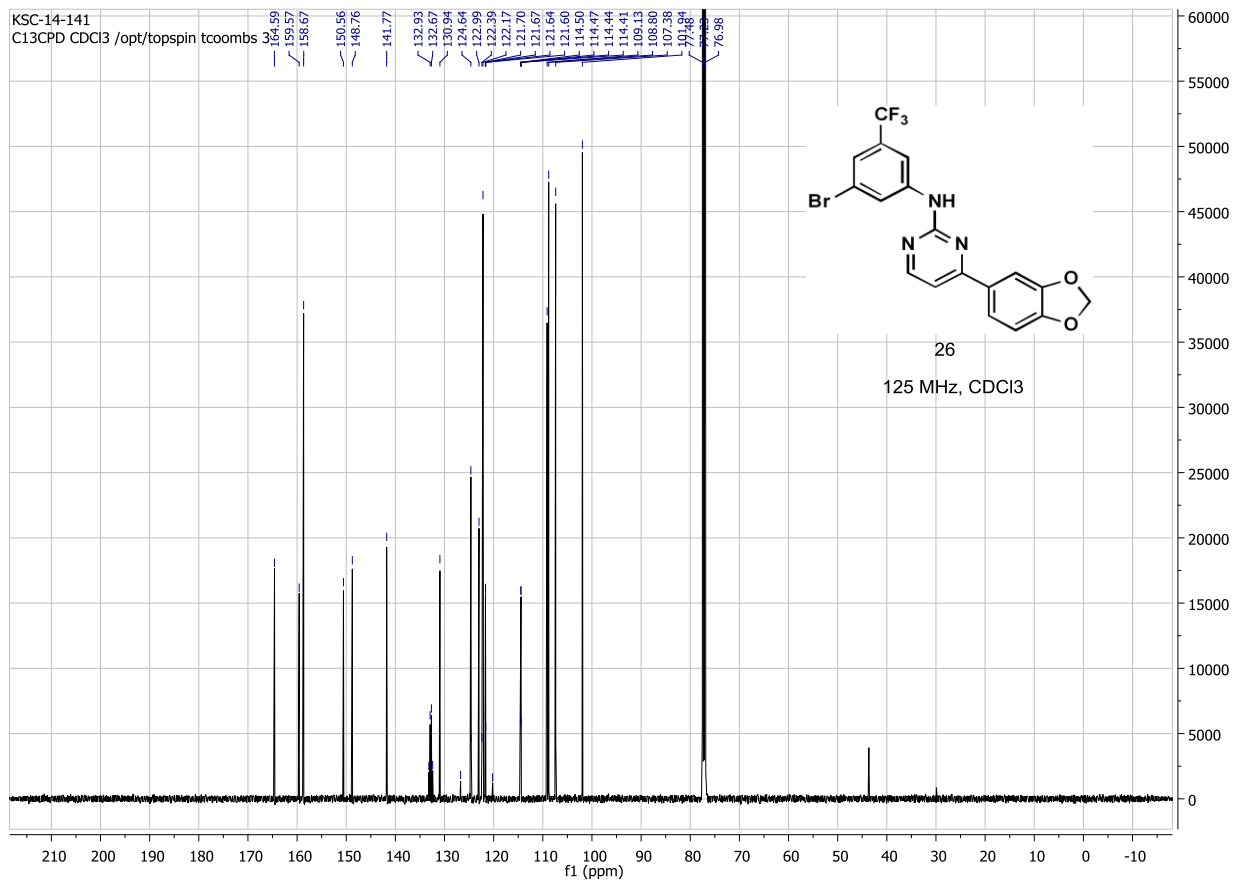



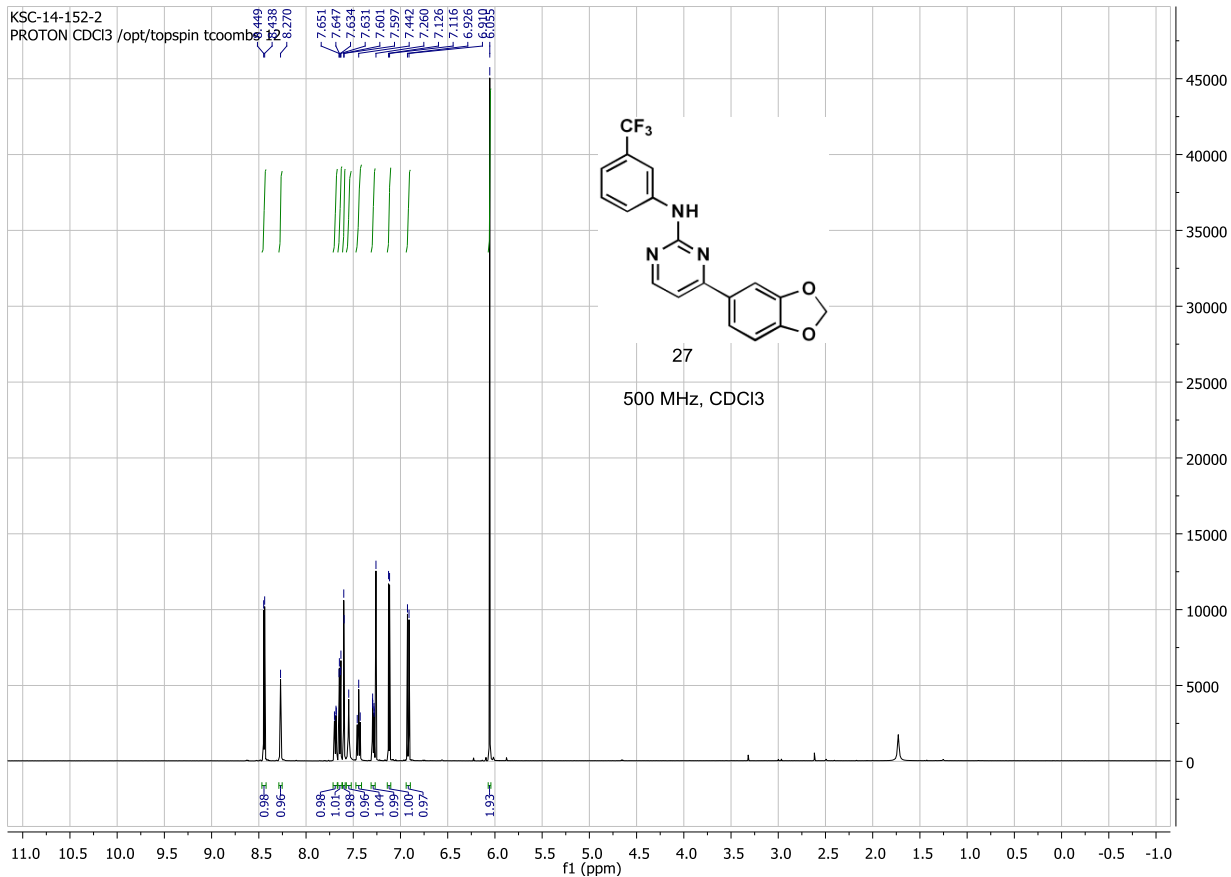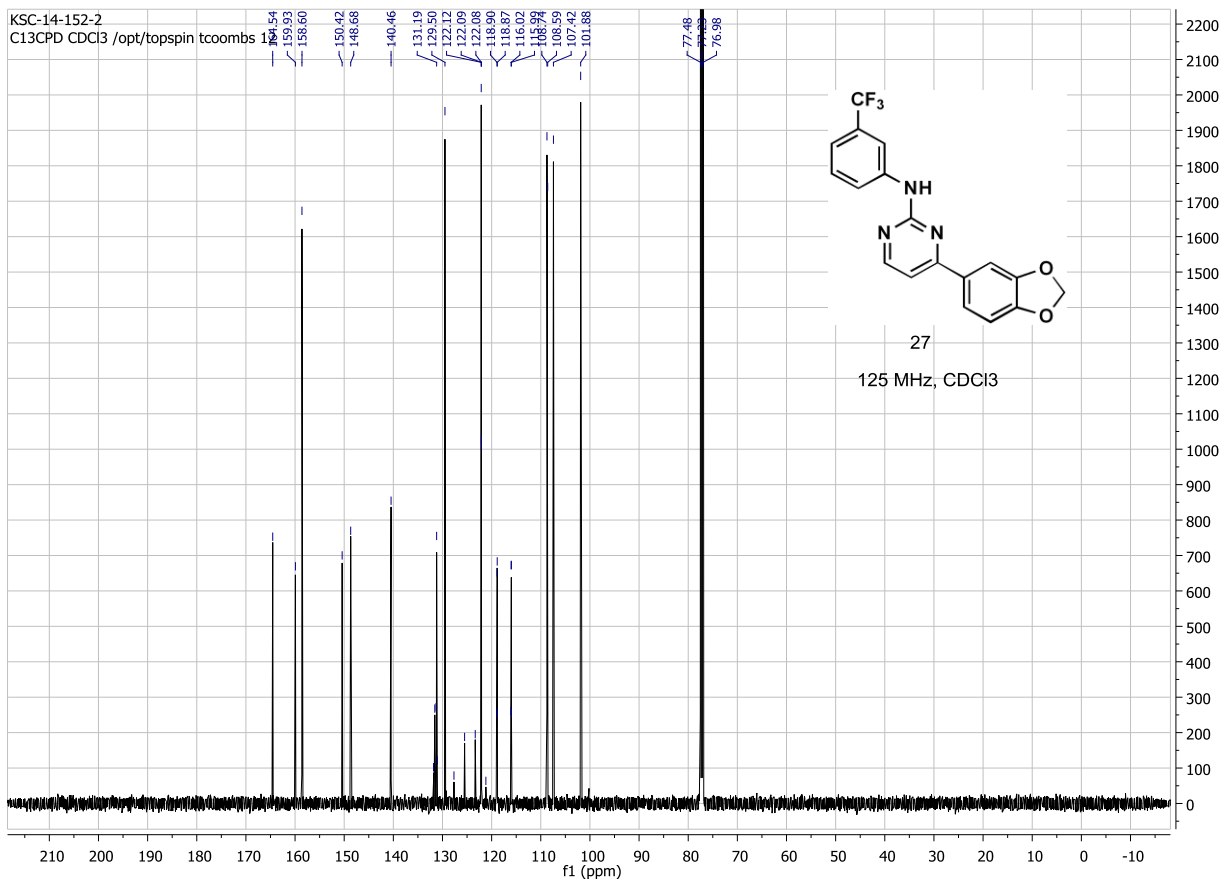

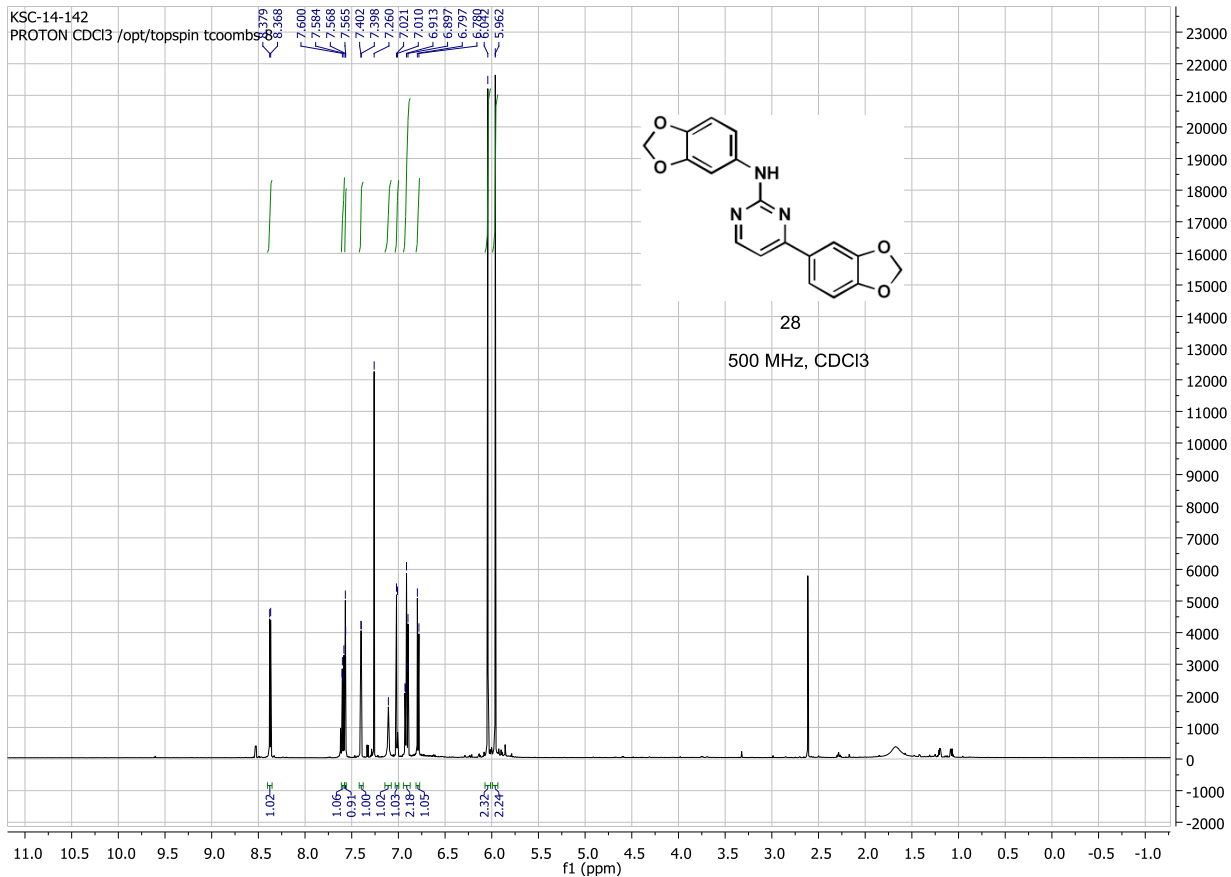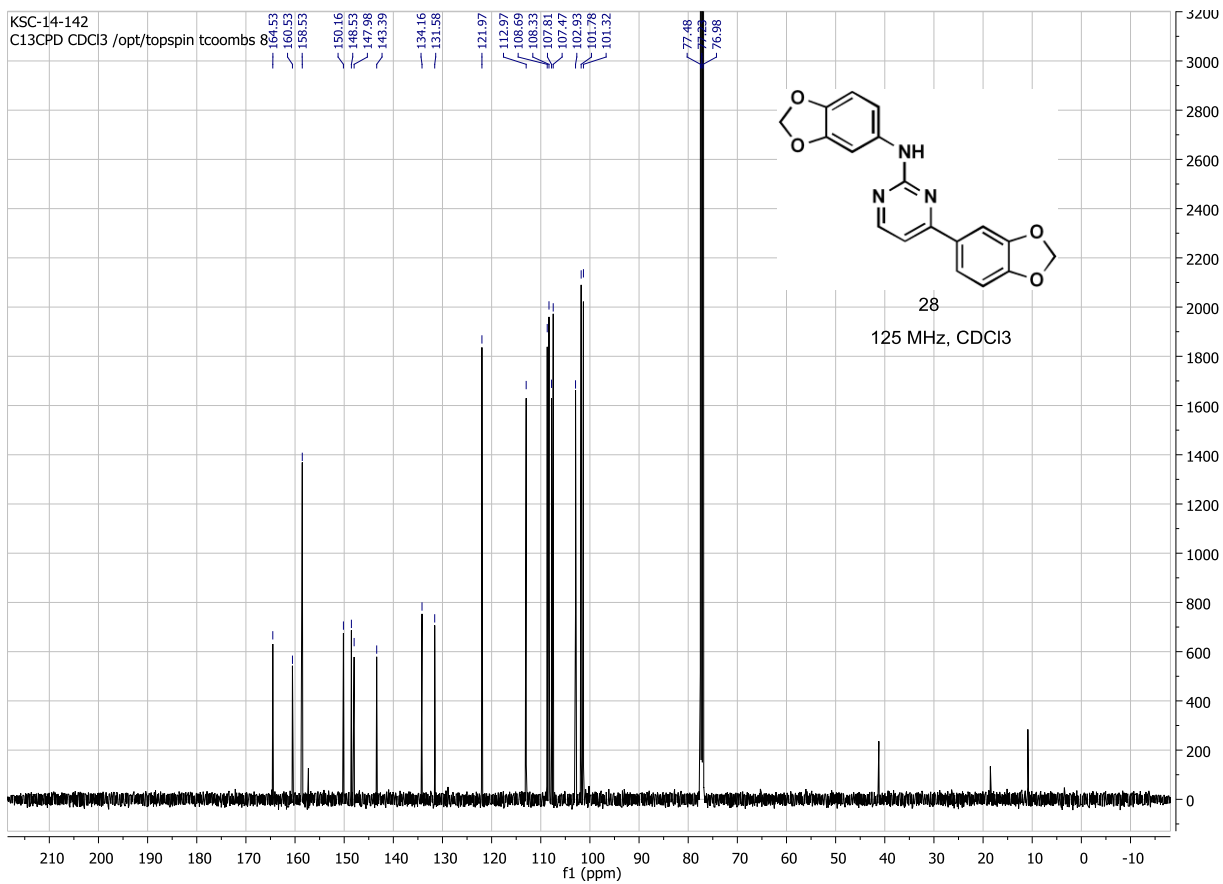

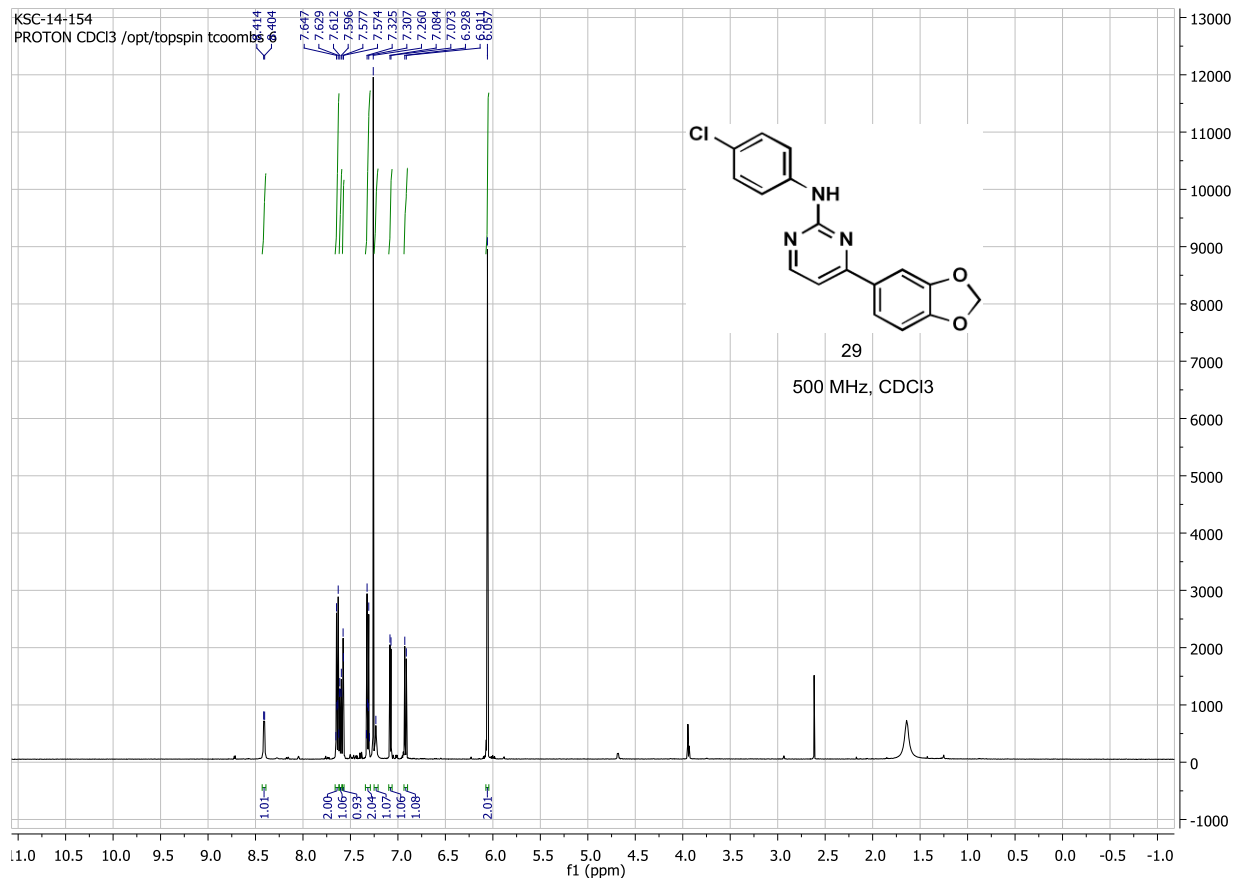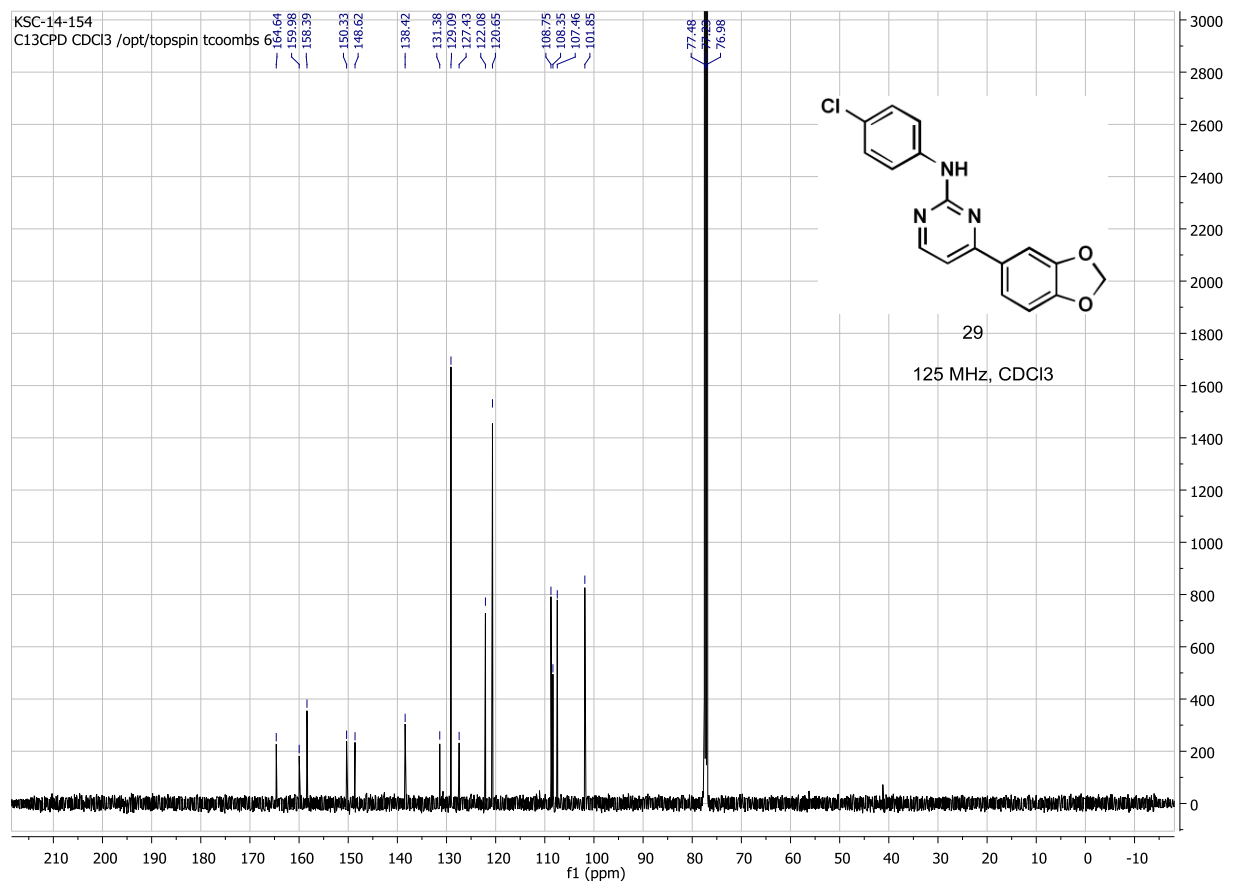

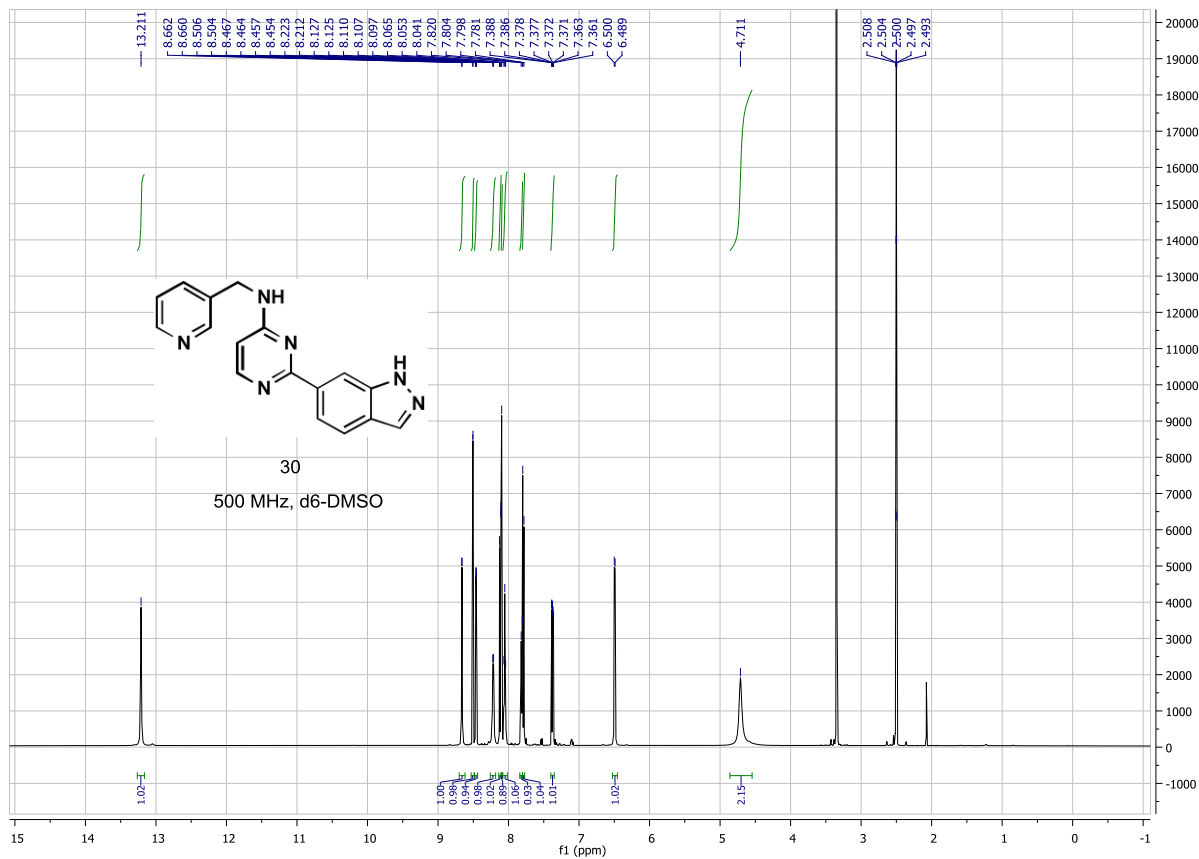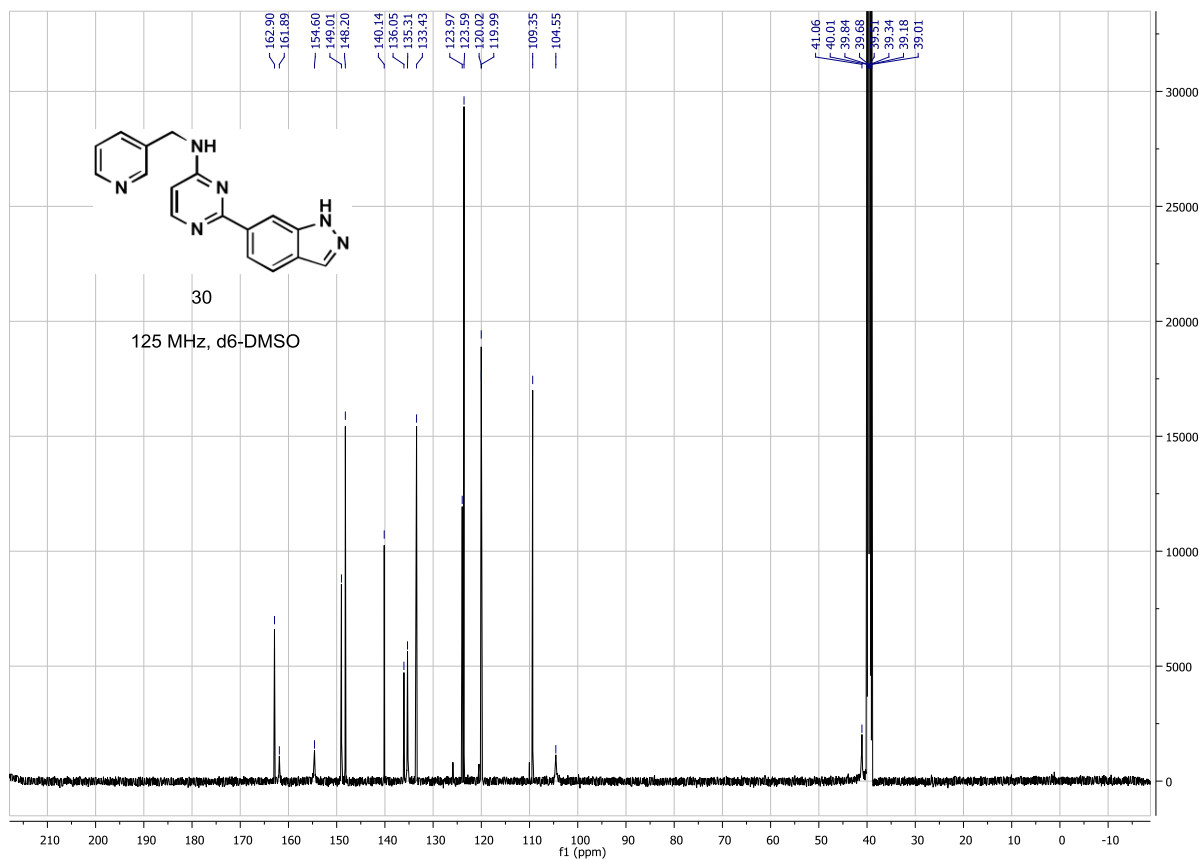

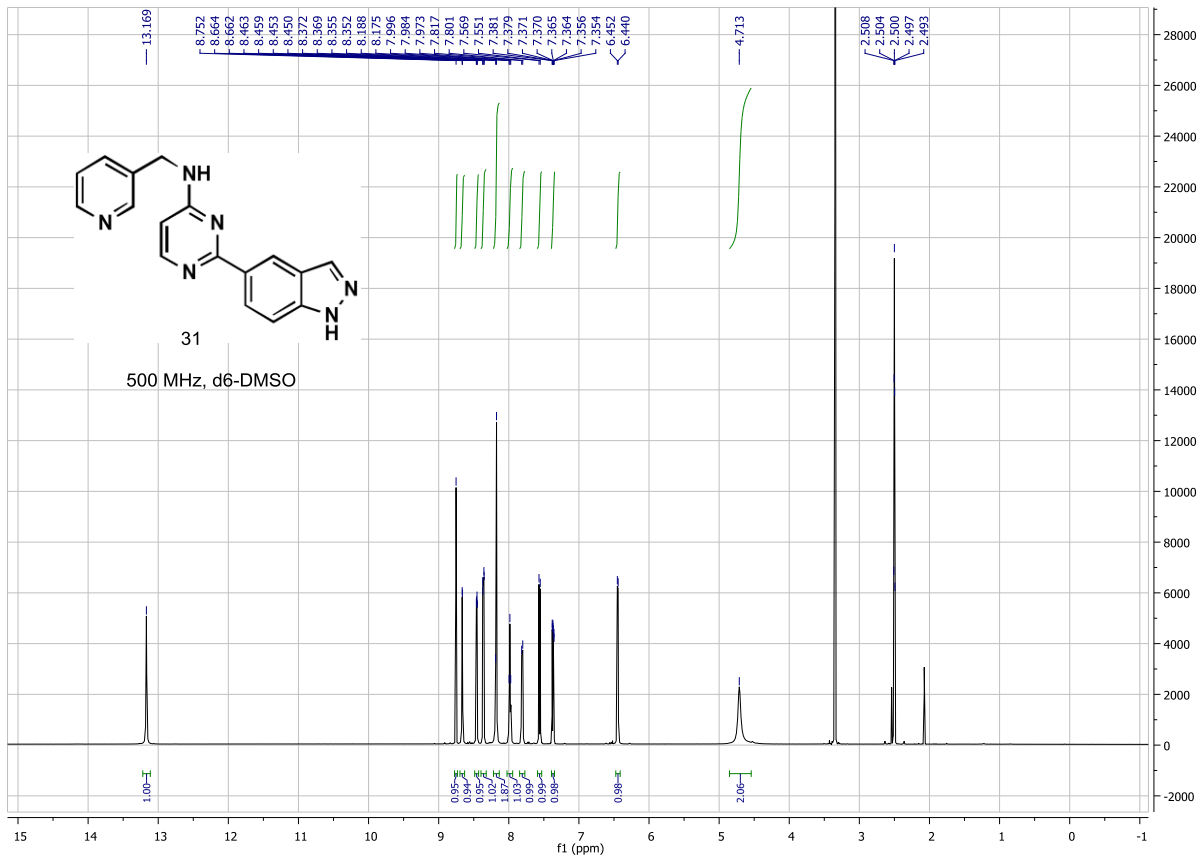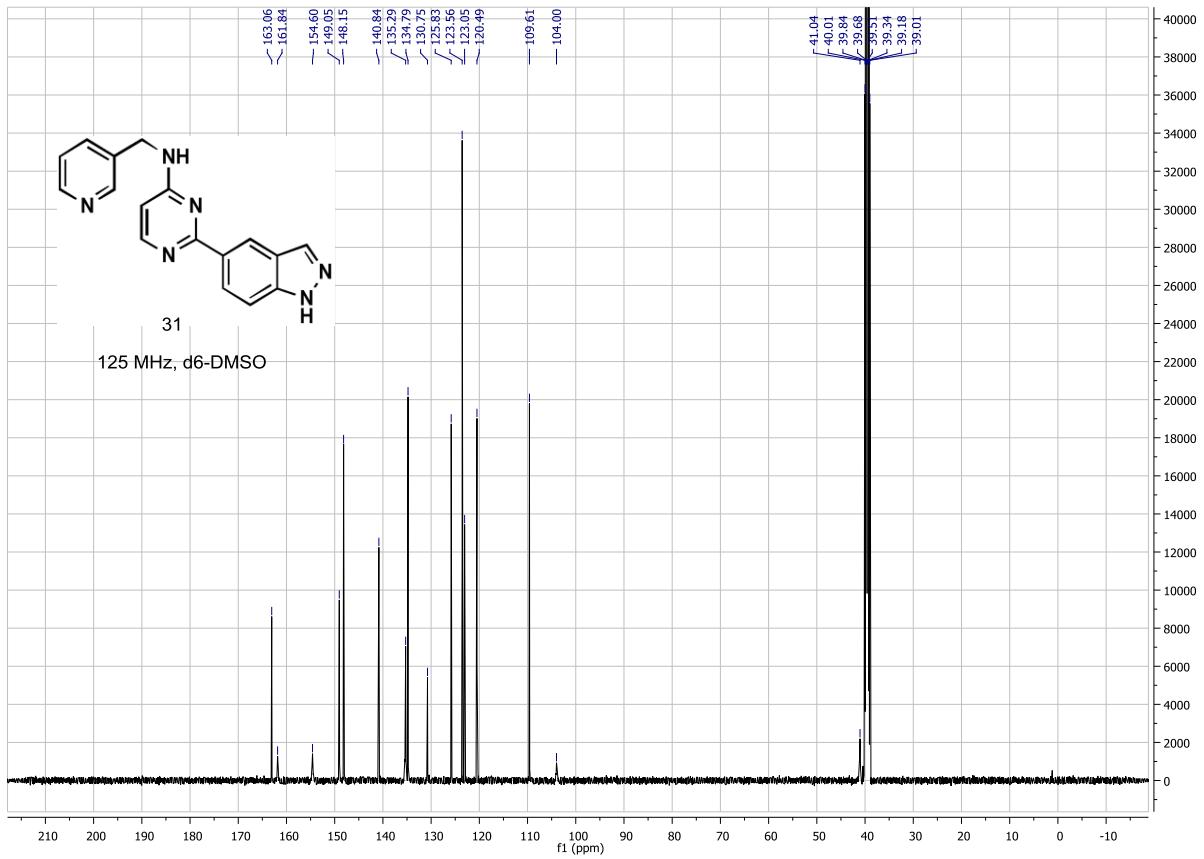



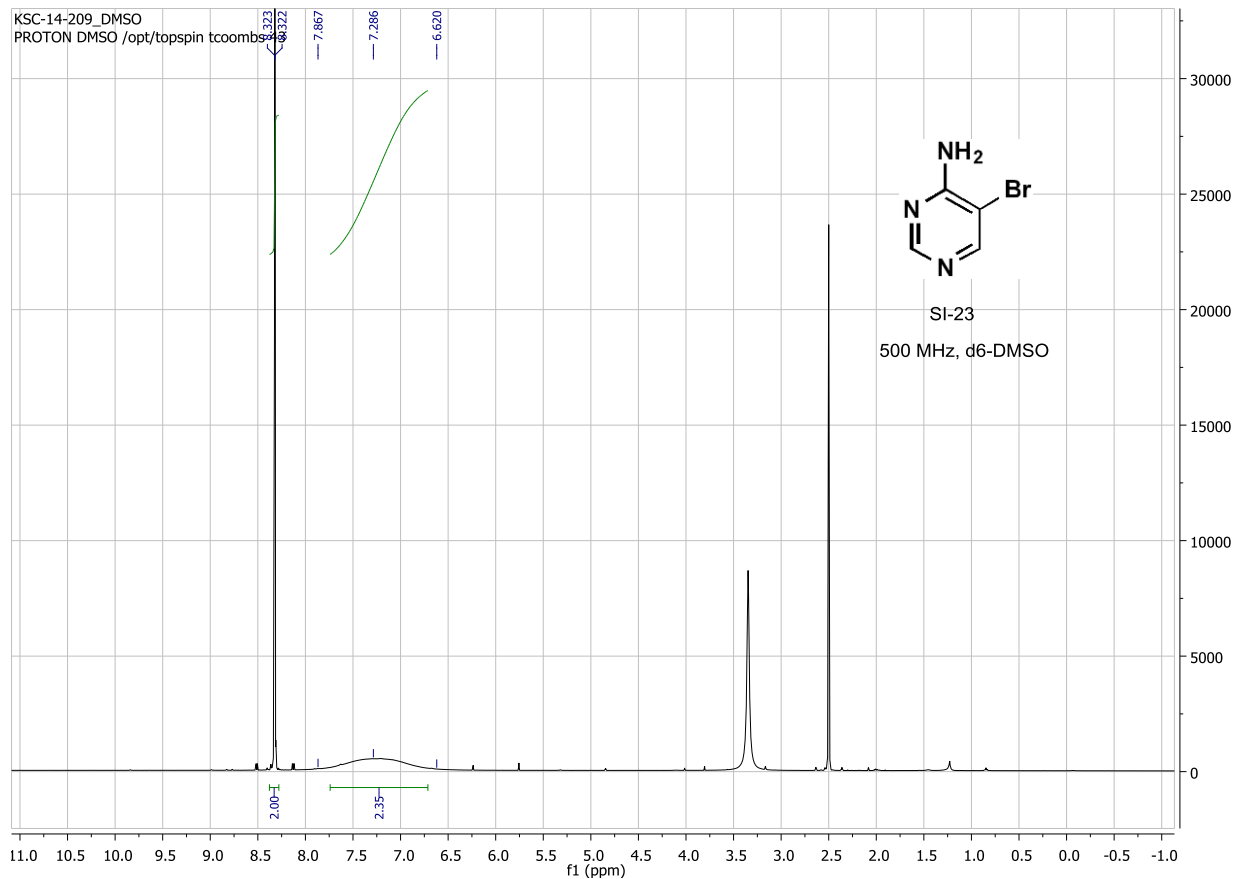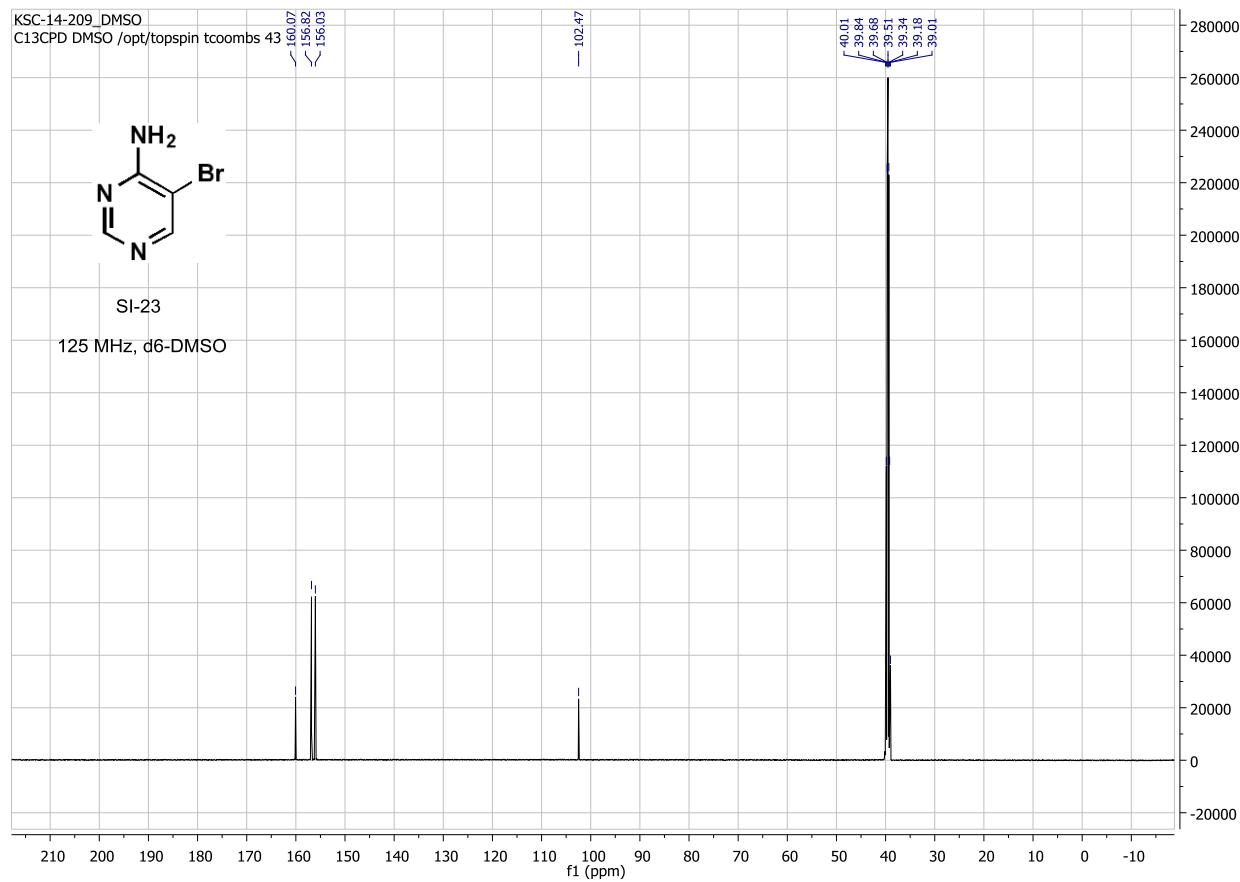

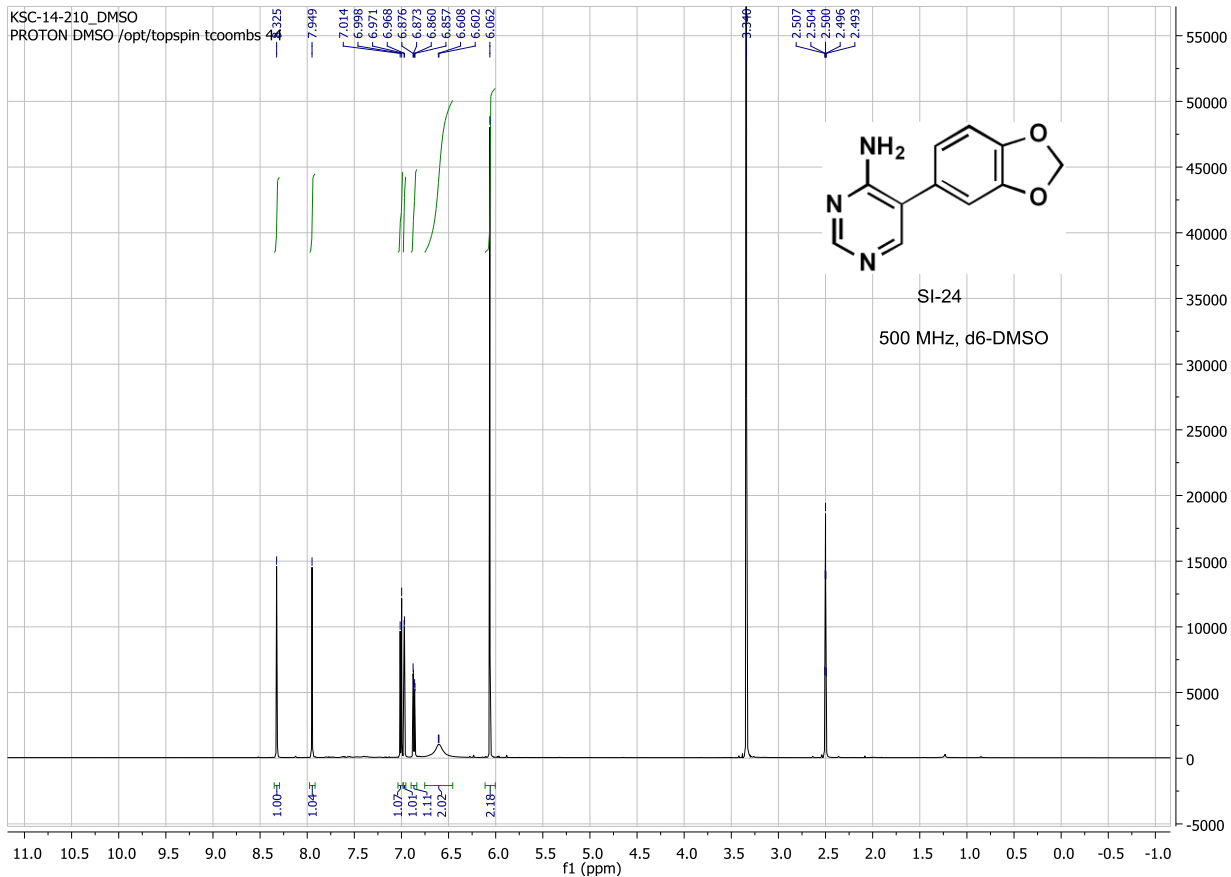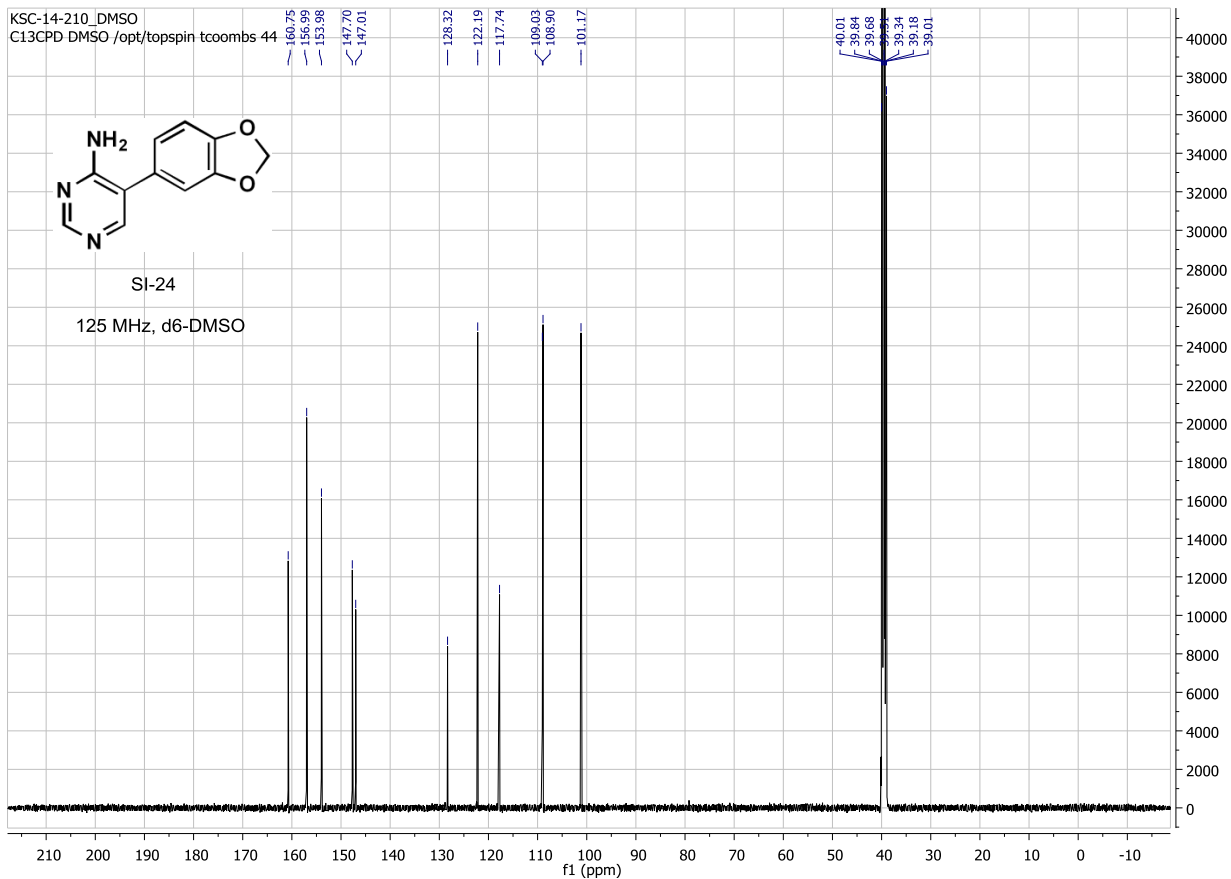

SI-B-96



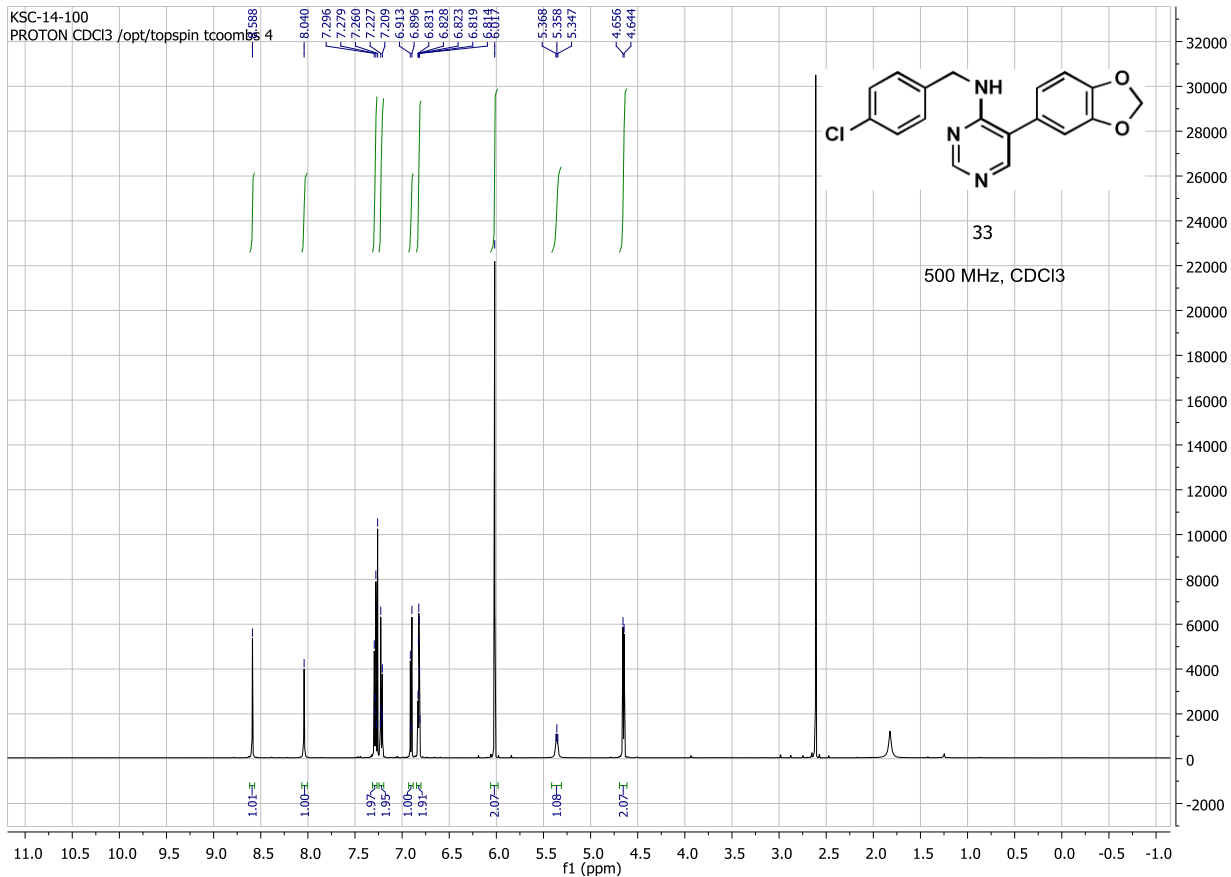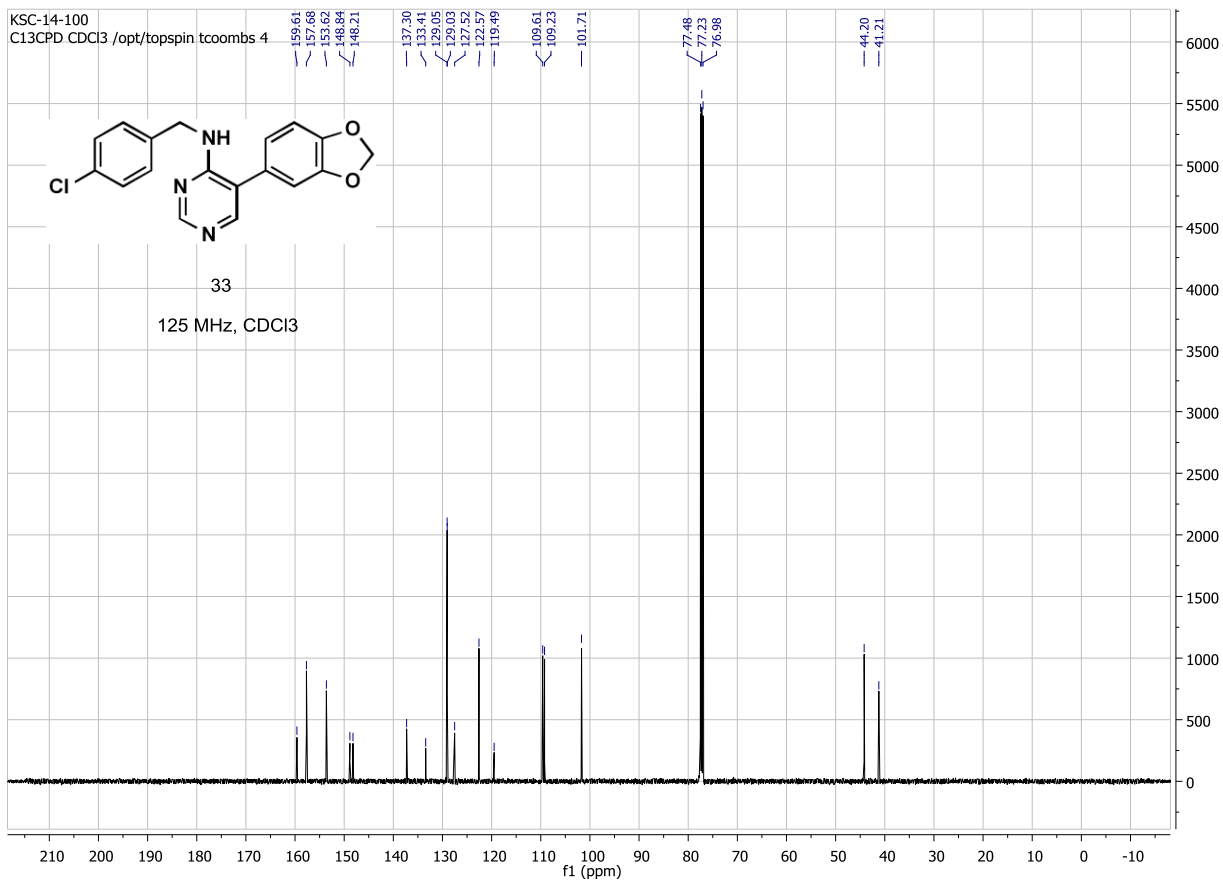

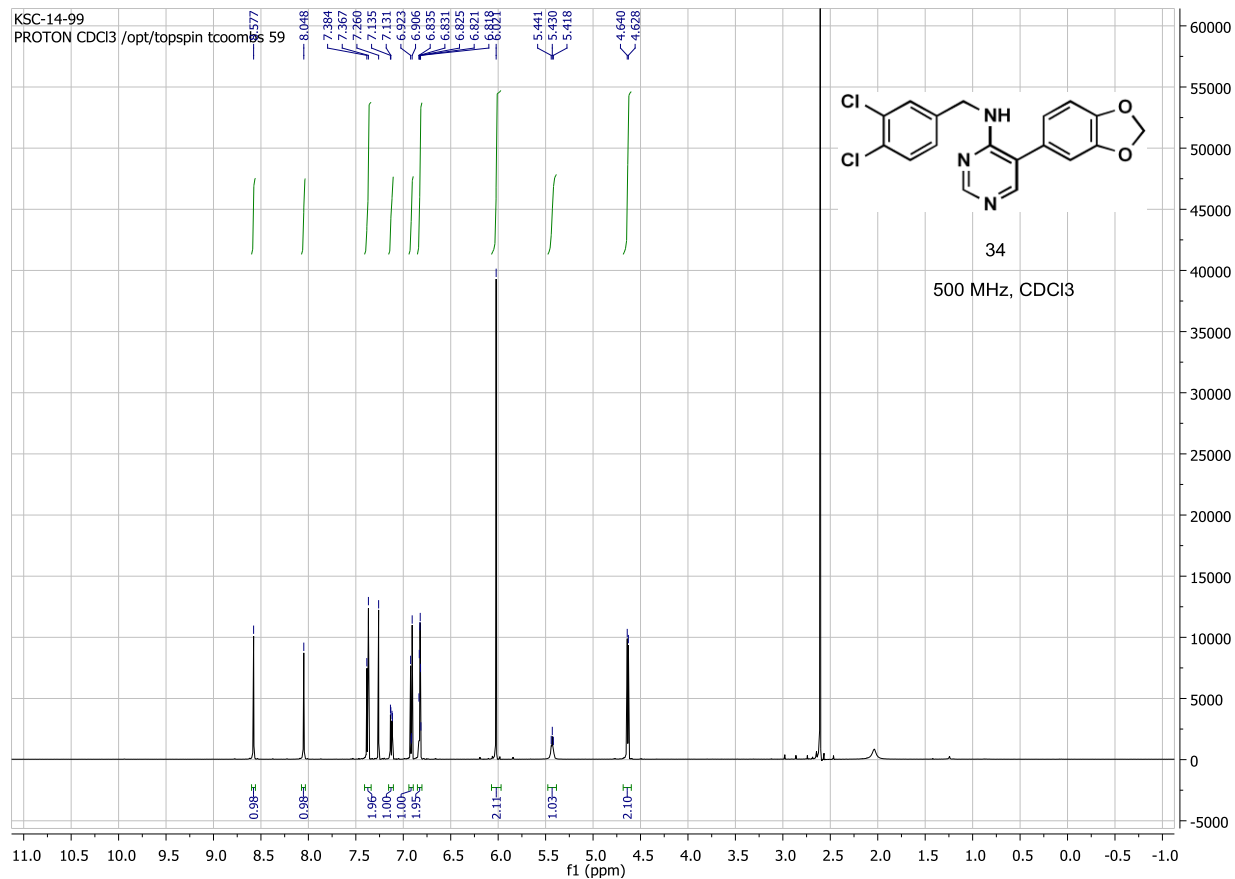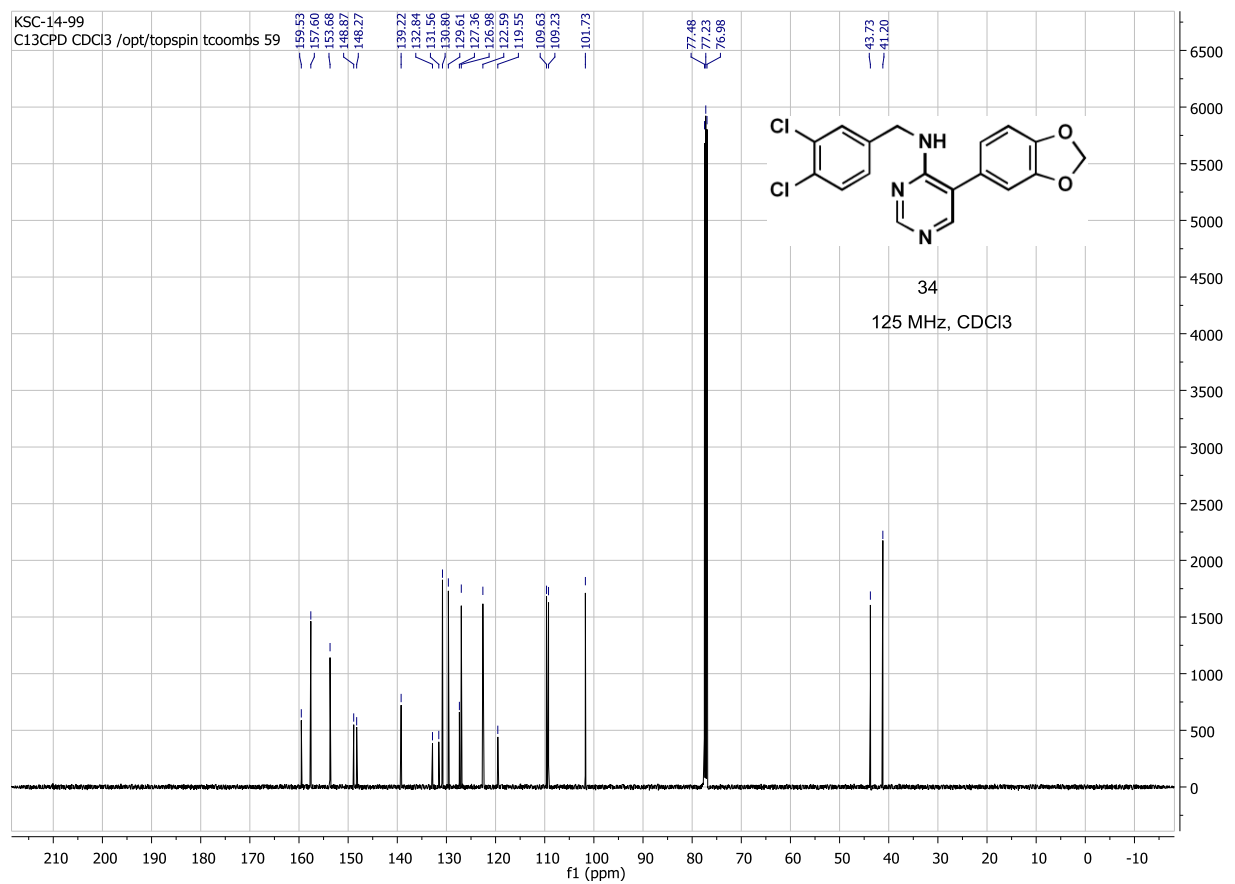

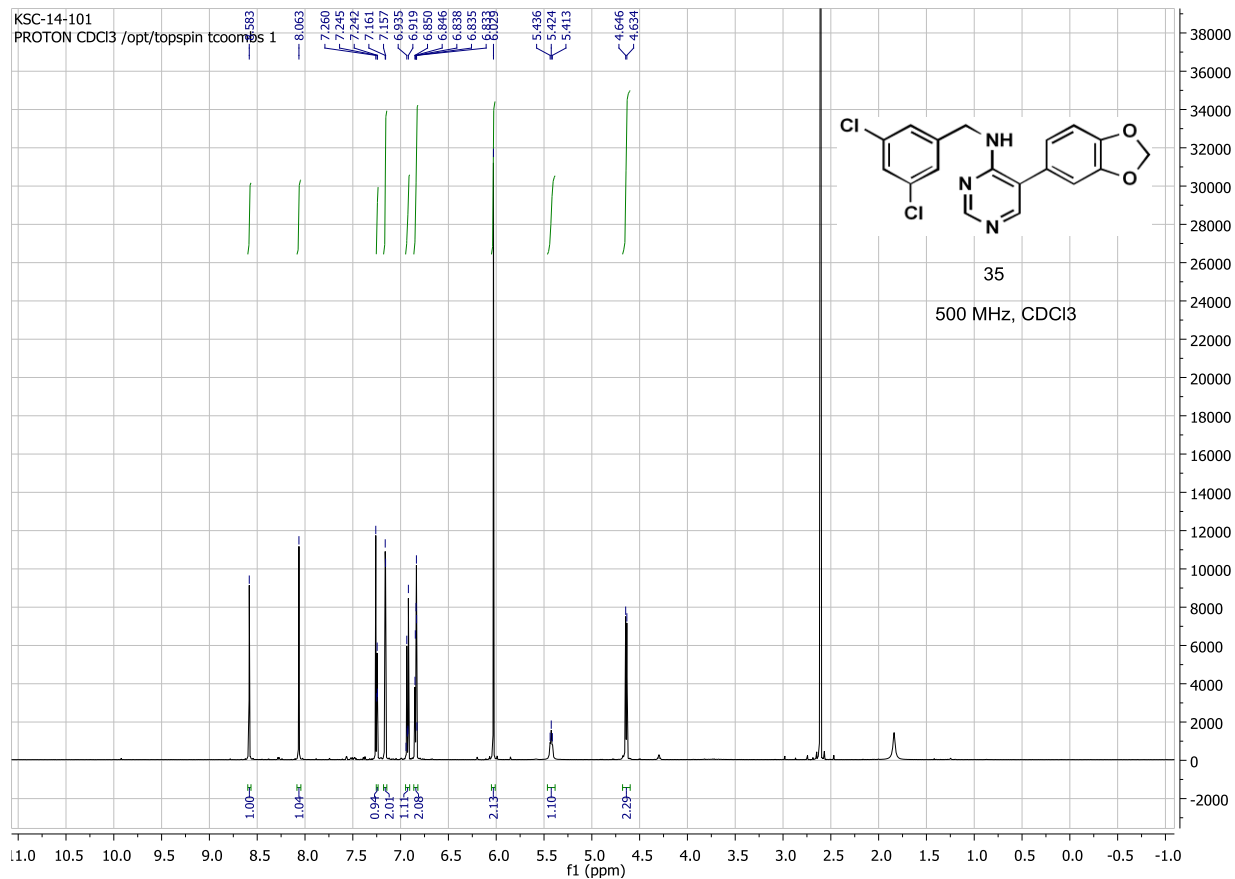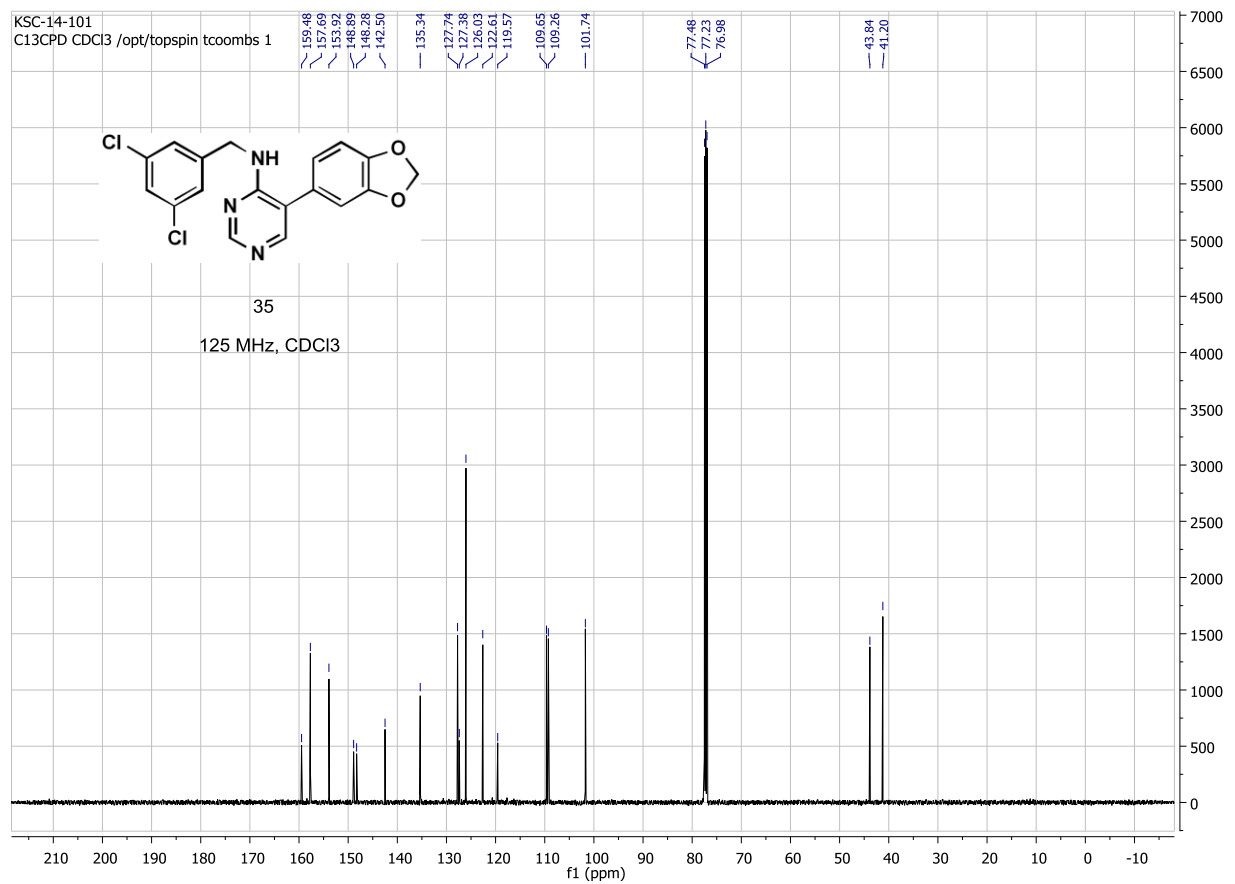

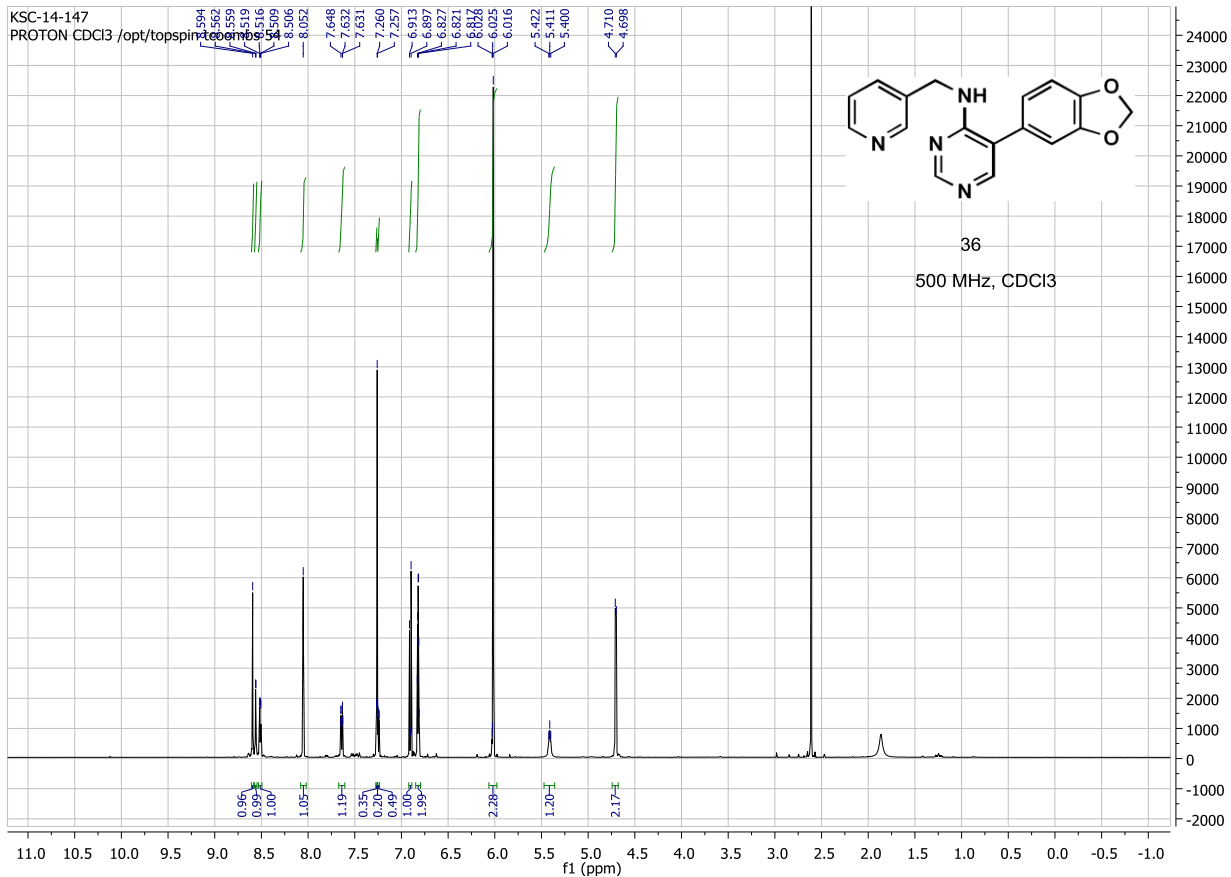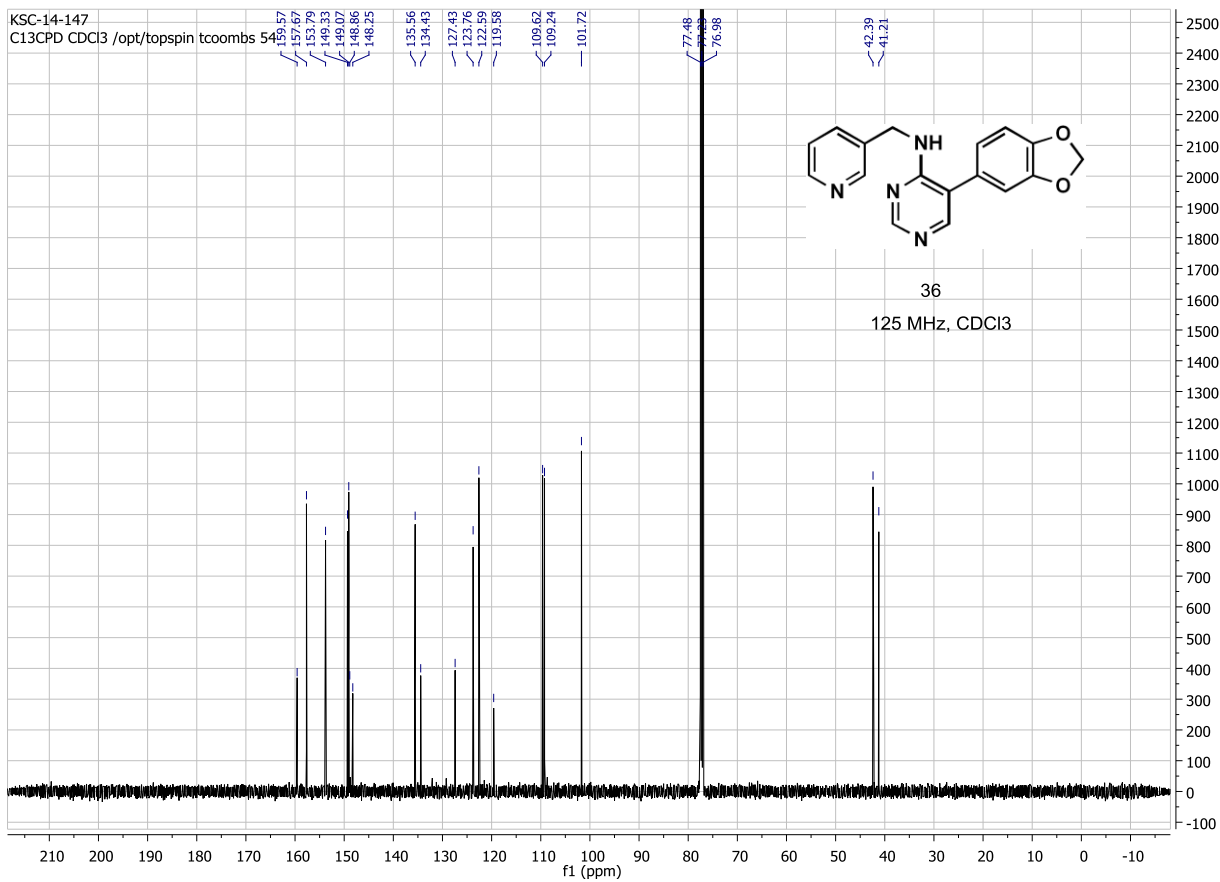

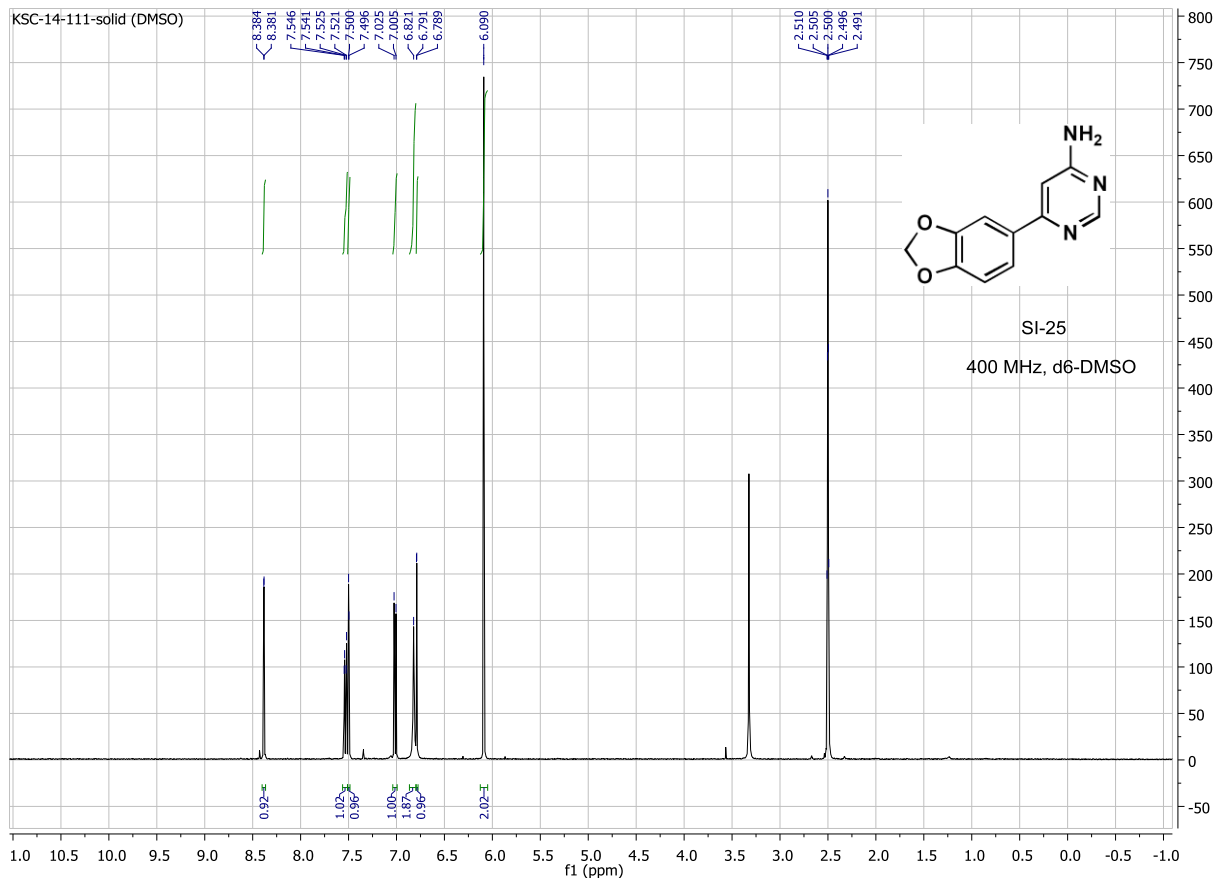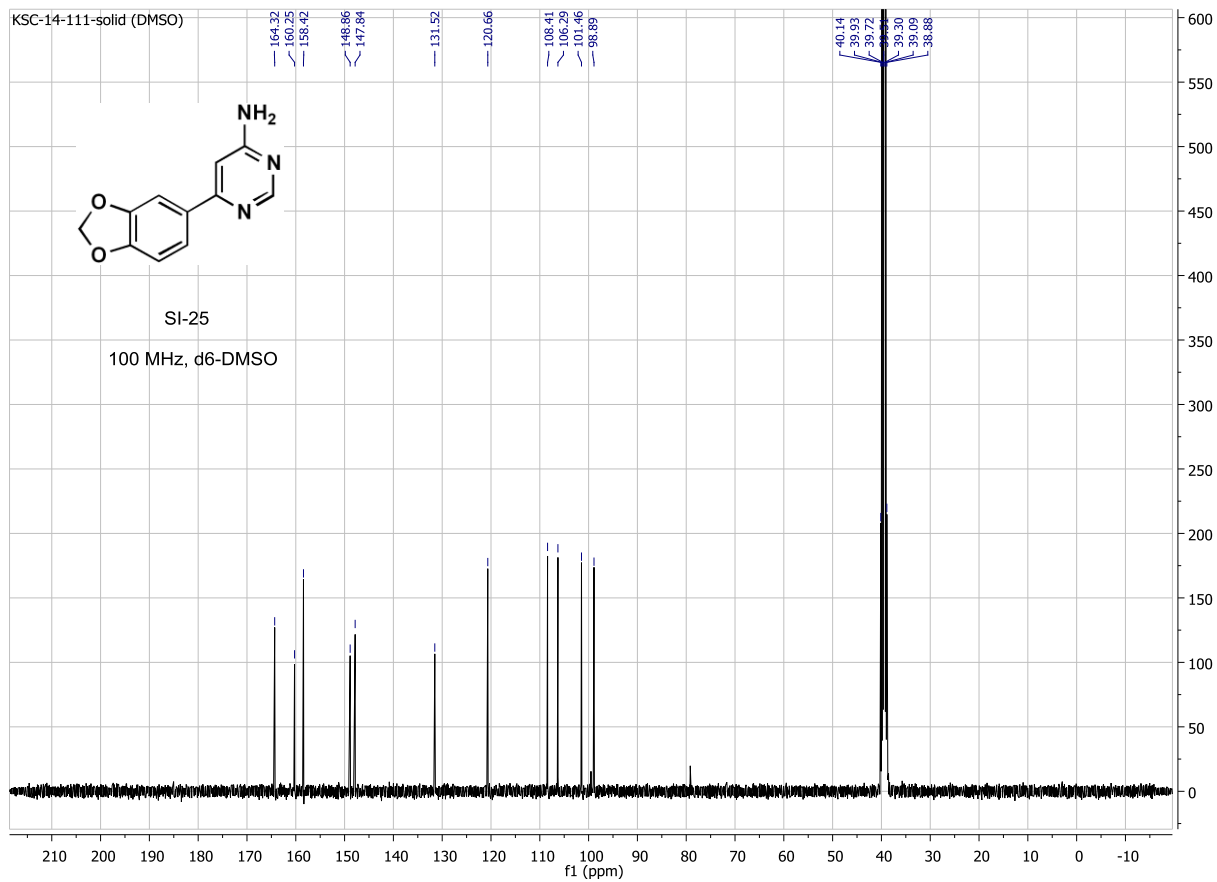

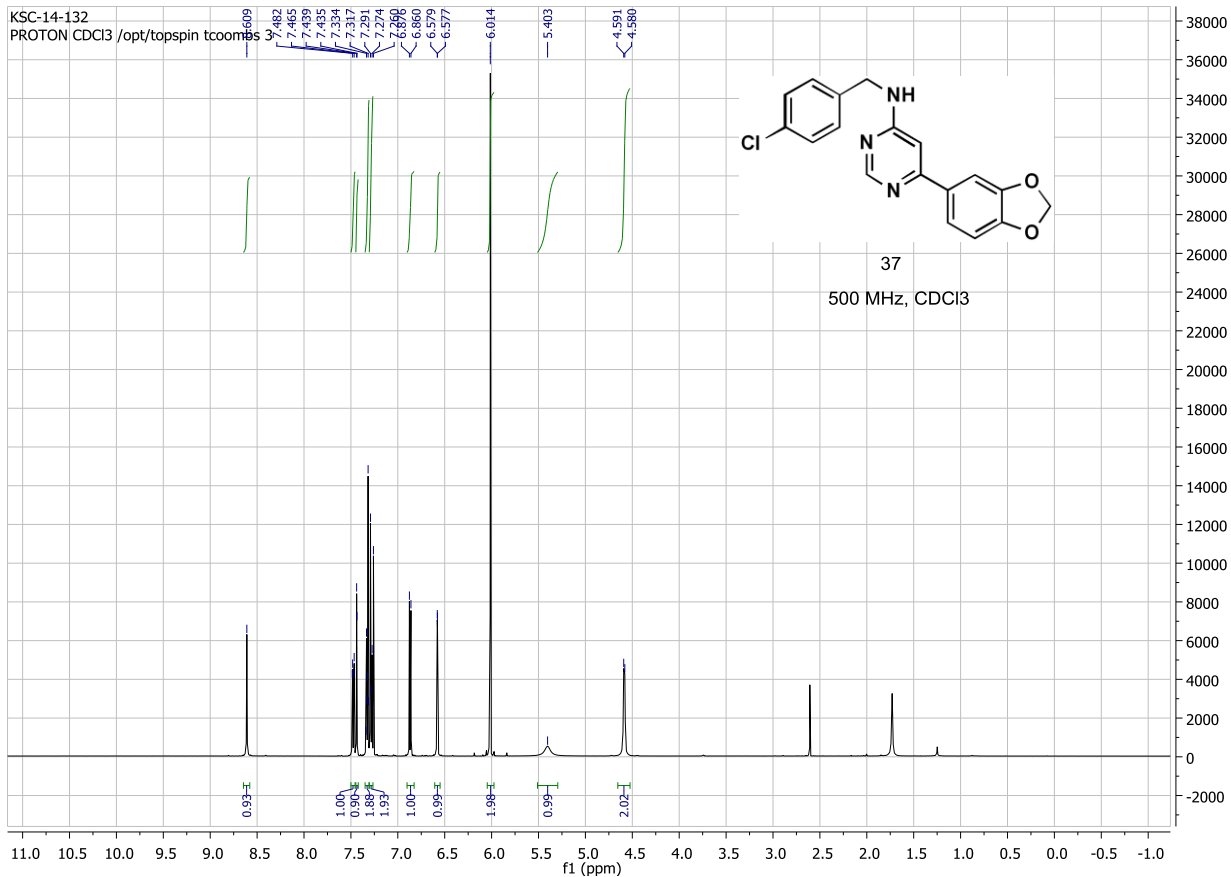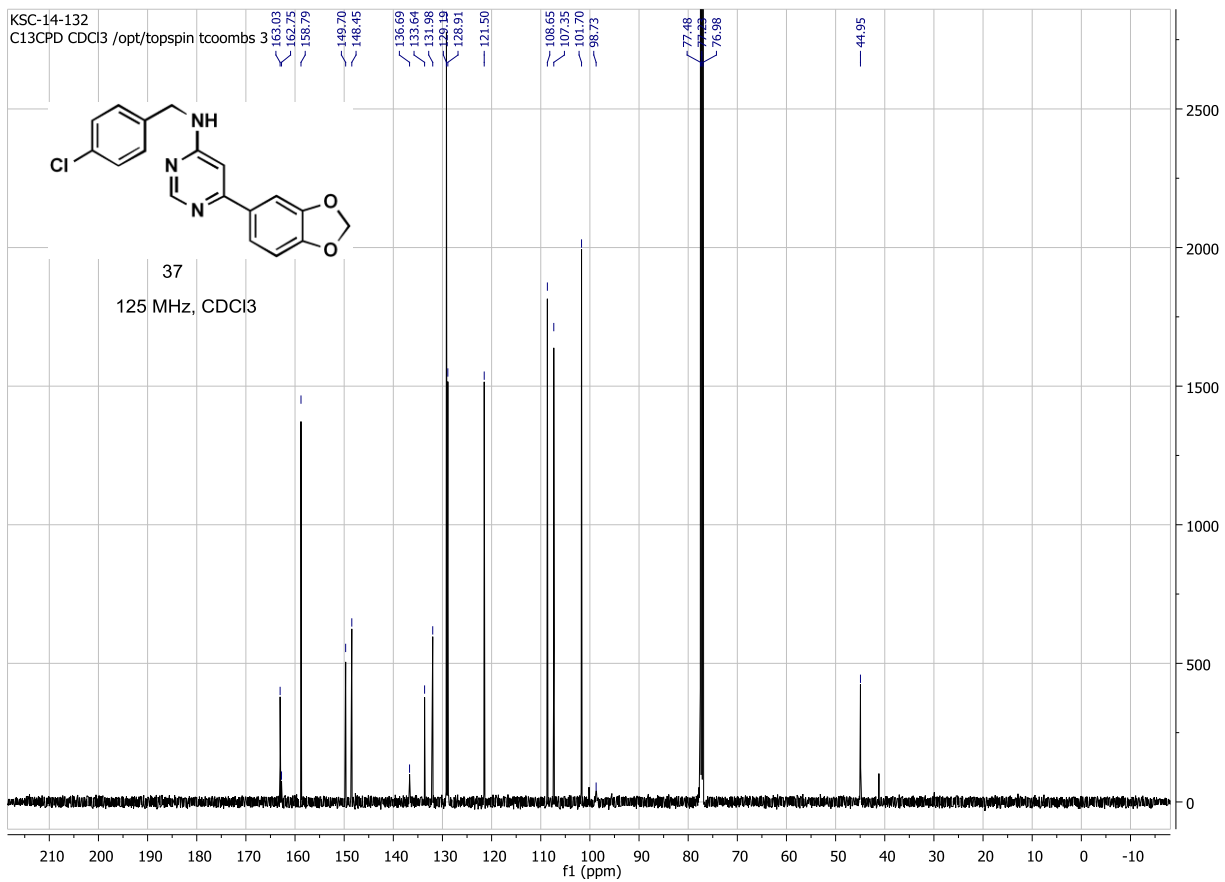

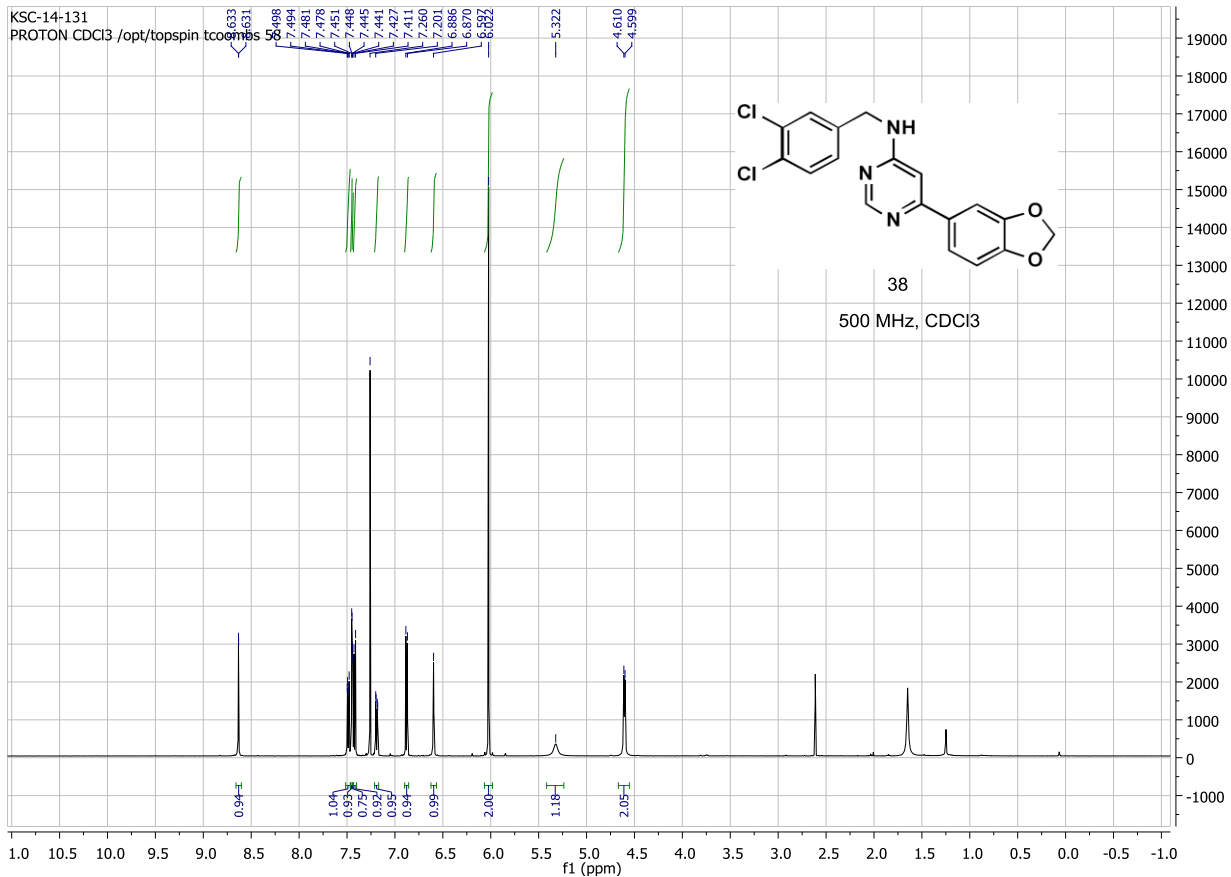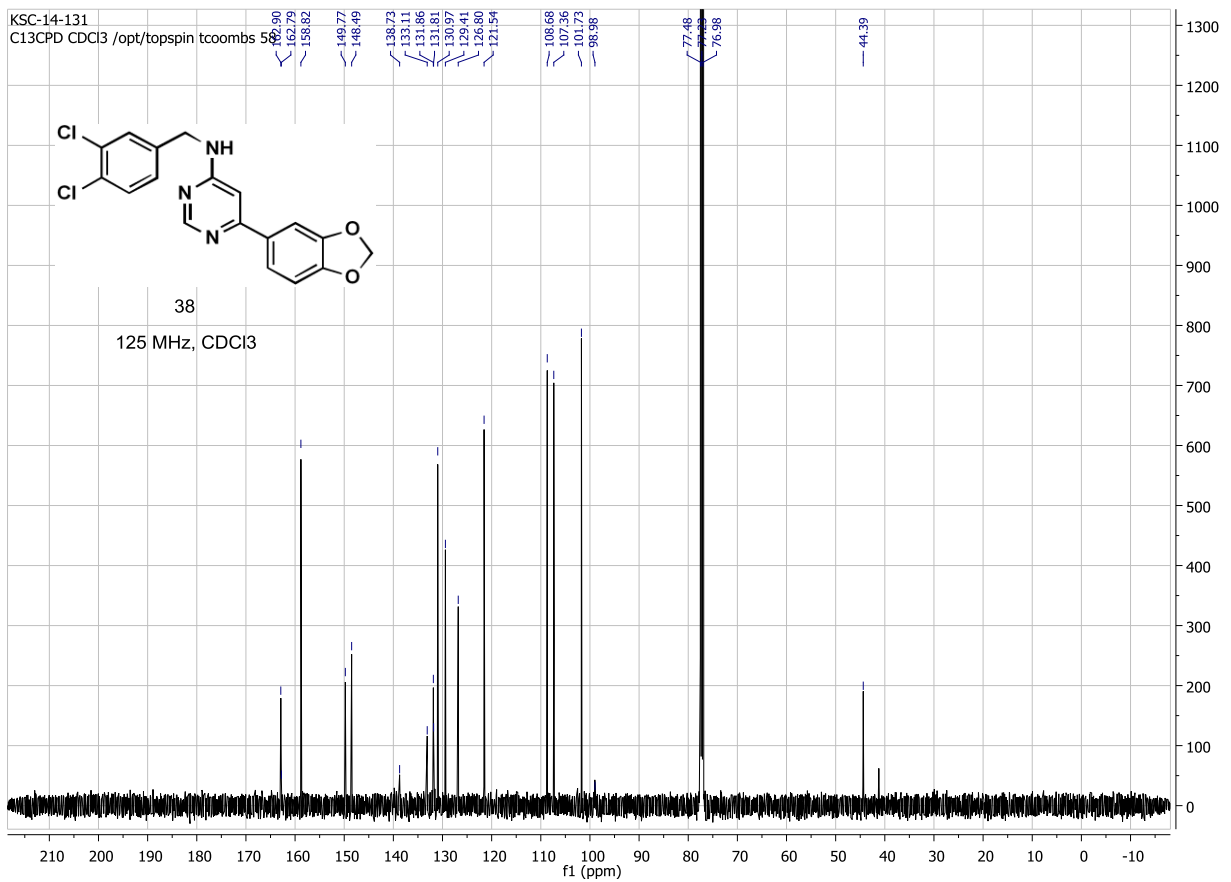

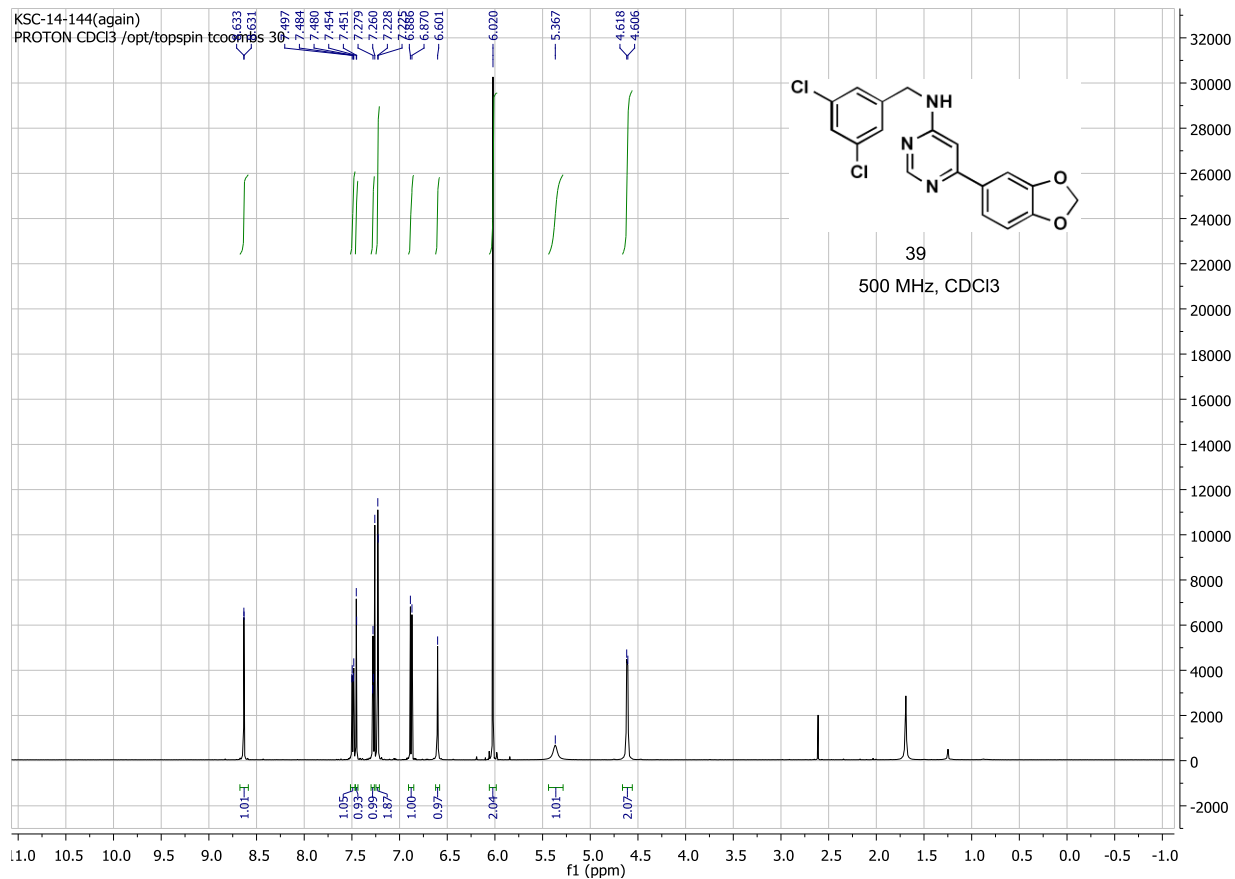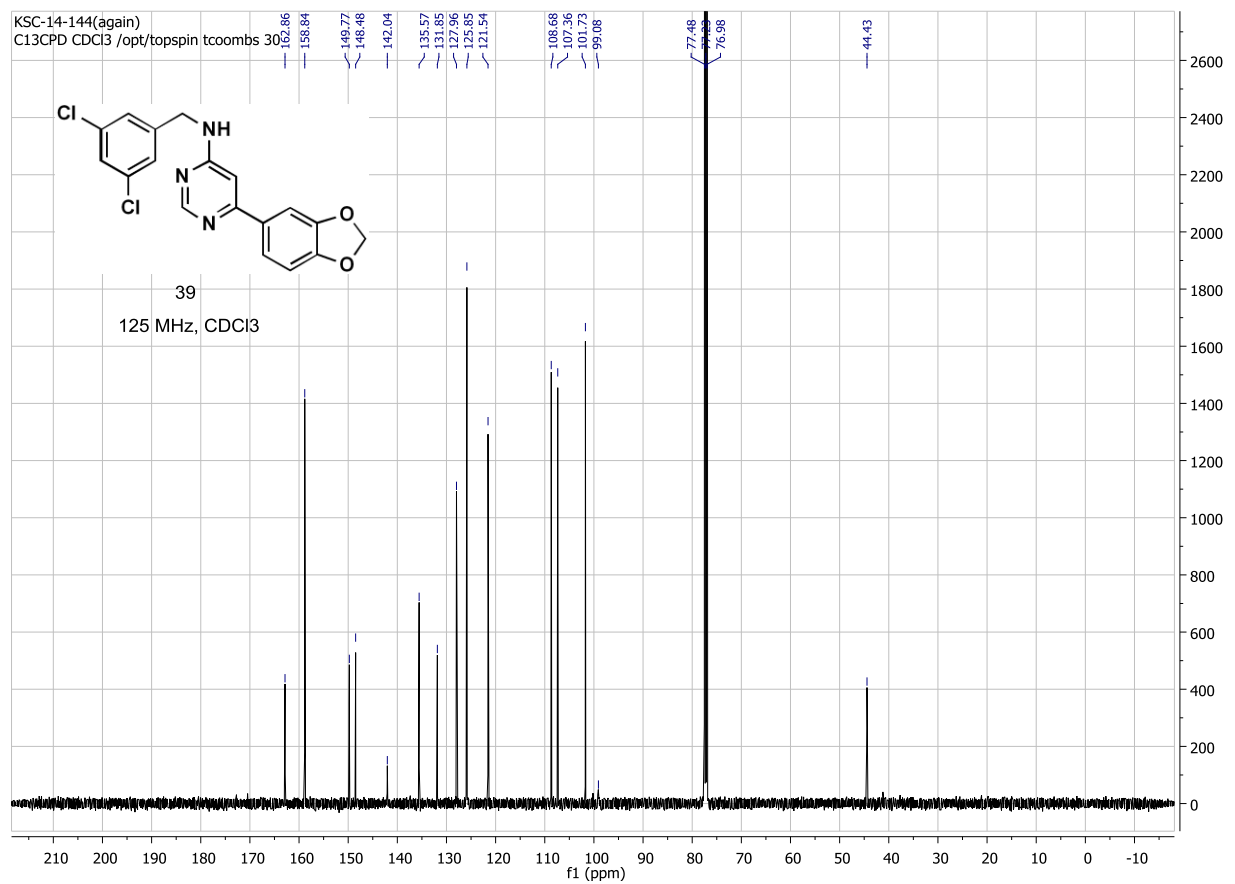



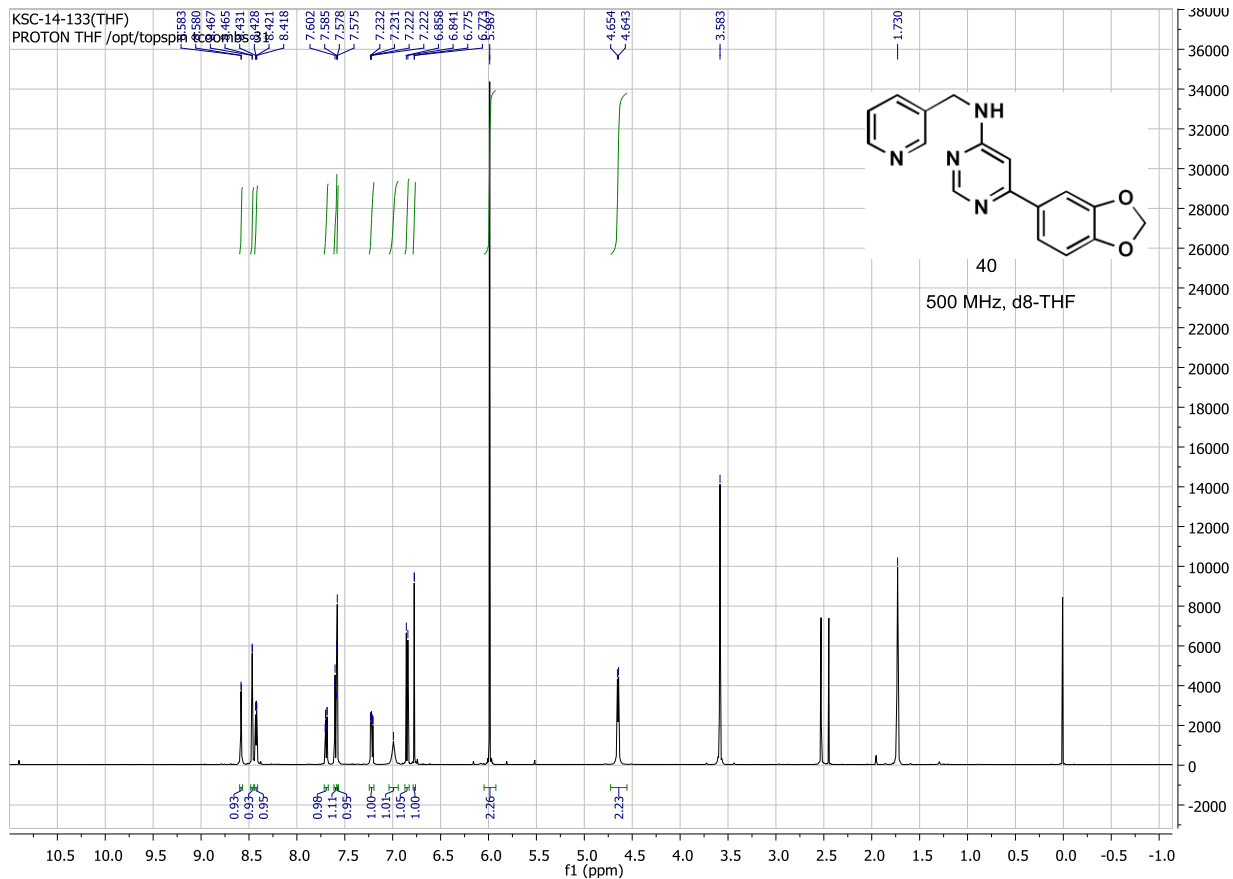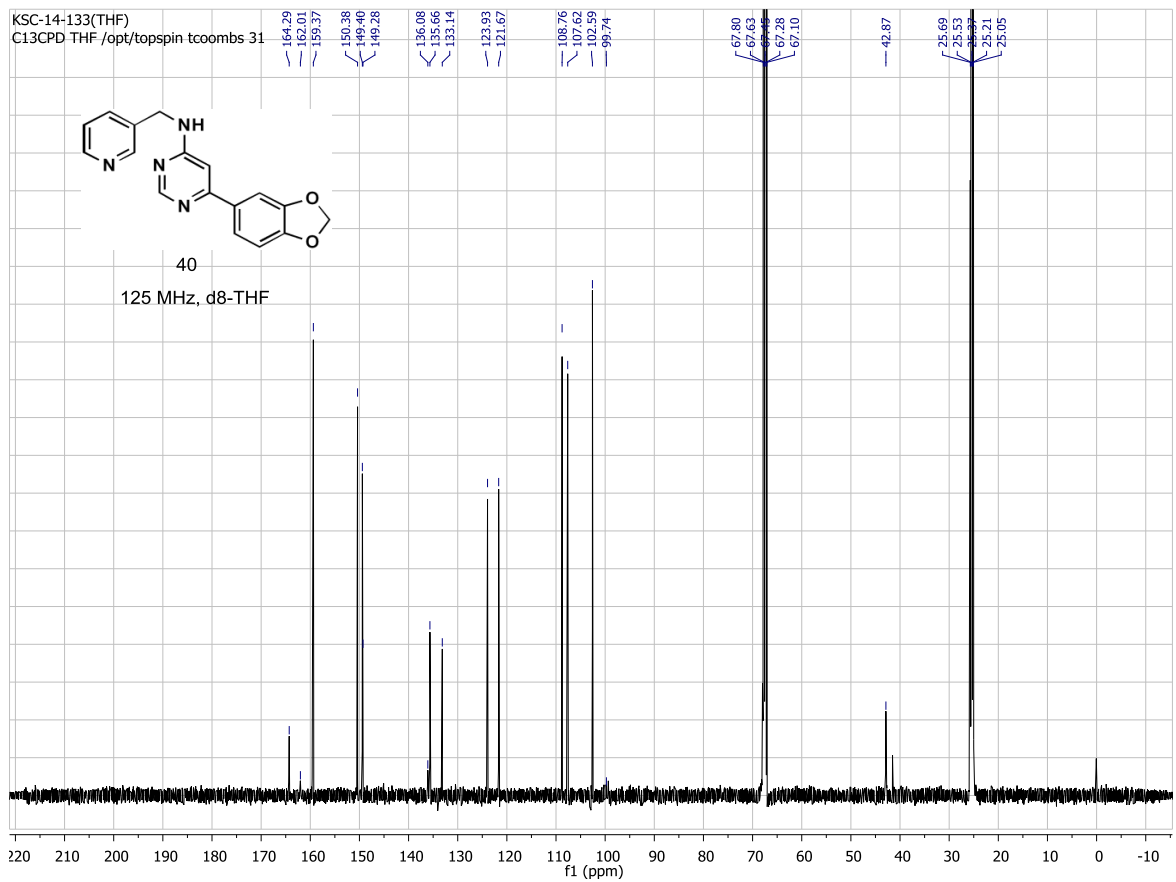

Supplement: NIHMS462904-supplement-02.pdf [file NIHMS462904-supplement-02.pdf]
